# Supplementary material for: The spatiotemporal patterns of major human admixture events during the European Holocene
Source: eLife. 2022 May 30;11:e77625. doi: 10.7554/eLife.77625 (PMC9293011; doi:10.7554/eLife.77625)
Supplement: Supplementary file 1. — (A) Information on ancient samples used in our study. (B) Estimated dates of admixture for population mixture events during the European Holocene. [file elife-77625-supp1.xlsx]

## Sheet: Supplementary File 1A
Supplementary File 1A: Meta-Information on ancient samples used in our study (from dataset, v44.3_1240K_public)
Individual_ID (Instance-ID)	Sex	Ind_ID_Population_label	Age (in BCE) (using 1950 convention)	Age range (in BCE)	Country	Latitude	Longitude	Number of non-missing markers (out of 1.2 million on autosomes)	Contamination	Group label (used in our analysis)	Split group labels (used in our analysis)	Pooled group labels (used in our analysis)
I0707	F	Turkey_N	6146	6225-6065calBCE(7272±34BP,Tubitak-0455)	Turkey	40.3037	29.57	990132	PASS	Anatolian_farmers
I0708	M	Turkey_N	6151	6224-6074calBCE(7285±30BP,PSUAMS-2103)	Turkey	40.3037	29.57	980130	PASS(Xcontam=0.008)	Anatolian_farmers
I0709	M	Turkey_N	6135	6223-6034calBCE(7255±30BP,PSUAMS-2952)	Turkey	40.3037	29.57	987745	PASS(Xcontam=0.008)	Anatolian_farmers
I0726	F	Turkey_N	6000	6400-5600BCE	Turkey	40.26	29.65	228543	PASS	Anatolian_farmers
I0736	F	Turkey_N	6350	6500-6200BCE	Turkey	40.3037	29.57	799433	PASS	Anatolian_farmers
I0744	M	Turkey_N	6320	6400-6239calBCE(7455±30BP,PSUAMS-2299)	Turkey	40.3037	29.57	884258	PASS(Xcontam=0.01)	Anatolian_farmers
I0745	M	Turkey_N	6293	6387-6111calBCE(7405±30BP,PSUAMS-2105)	Turkey	40.3037	29.57	996769	PASS(Xcontam=0.008)	Anatolian_farmers
I0746	M	Turkey_N	5978	6070-5888calBCE(7110±50BP,Poz-82177)	Turkey	40.3037	29.57	1003994	PASS(Xcontam=0.008)	Anatolian_farmers
I1096	M	Turkey_N	6350	6500-6200BCE	Turkey	40.3037	29.57	759115	PASS	Anatolian_farmers
I1097	M	Turkey_N	6332	6420-6245calBCE(7475±30BP,PSUAMS-2297)	Turkey	40.3037	29.57	755758	PASS(Xcontam=[0.005,0.013])	Anatolian_farmers
I1098	F	Turkey_N	6332	6419-6246calBCE(7475±25BP,PSUAMS-2947)	Turkey	40.3037	29.57	780873	PASS	Anatolian_farmers
I1099	M	Turkey_N	6350	6500-6200BCE	Turkey	40.3037	29.57	544031	PASS	Anatolian_farmers
I1100	F	Turkey_N	6350	6500-6200BCE	Turkey	40.3037	29.57	294382	PASS(mtcontam=[0.965,0.979])	Anatolian_farmers
I1101	M	Turkey_N	6350	6500-6200BCE	Turkey	40.3037	29.57	663312	PASS	Anatolian_farmers
I1102	M	Turkey_N	6350	6500-6200BCE	Turkey	40.3037	29.57	414820	PASS	Anatolian_farmers
I1103	M	Turkey_N	6350	6500-6200BCE	Turkey	40.3037	29.57	607546	PASS	Anatolian_farmers
ZBC_IPB001.B-C0101_Luk2-Pinarbasi	M	Turkey_Epipaleolithic	13461	13629-13308calBCE(12890±40BP,MAMS-30693)	Turkey	37.4833	33.0333	863964	PASS(literature)	Anatolian_hunter-gatherer
I1407	M	Armenia_C	3925	4350-3500BCE	Armenia	39.73	45.2	791878	PASS	Armenia_C		Iran_N_pooled
I1409	F	Armenia_C	4097	4230-3984calBCE(5260±30BP,Poz-81110)	Armenia	39.73	45.2	92184	PASS	Armenia_C		Iran_N_pooled
I1631	F	Armenia_C	4149	4311-4049calBCE(5323±30BP,OxA-19332)	Armenia	39.73	45.2	816520	PASS	Armenia_C		Iran_N_pooled
I1632	M	Armenia_C	4126	4236-3994calBCE(5285±29BP,OxA-18599)	Armenia	39.73	45.2	812657	PASS	Armenia_C		Iran_N_pooled
I1634	M	Armenia_C	4206	4330-4056calBCE(5366±31BP,OxA-19331)	Armenia	39.73	45.2	751435	PASS	Armenia_C		Iran_N_pooled
I1633	F	Armenia_EBA	2515	2621-2354calBCE(3990±35BP,Poz-22234)	Armenia	40.65	45.1167	828539	PASS(mtcontam=[0.953,0.976])	Armenia_EBA		Iran_N_pooled
I1635	M	Armenia_EBA	2526	2623-2461calBCE(4005±35BP,Poz-81102)	Armenia	40.65	45.1167	817935	PASS	Armenia_EBA		Iran_N_pooled
I1658	F	Armenia_EBA	3212	3350-3041calBCE(4492±29BP,OxA-31874)	Armenia	40.383	43.8737	814932	PASS	Armenia_EBA		Iran_N_pooled
I5068	M	Austria_EN_LBK	5138	5500-4775BCE	Austria	48.6632	16.5897	329072	PASS	Austria_EN_LBK		Neolithic_Europe_pooled
I5069	F	Austria_EN_LBK	5011	5205-4907calBCE(6090±25BP,PSUAMS-4326)	Austria	48.6632	16.5897	843684	PASS	Austria_EN_LBK		Neolithic_Europe_pooled
I5070	M	Austria_EN_LBK	5098	5209-4998calBCE(6140±25BP,PSUAMS-4224)	Austria	48.5798	16.4693	868481	PASS	Austria_EN_LBK		Neolithic_Europe_pooled
I5204	M	Austria_EN_LBK	5000	5500-4500BCE	Austria	48.5798	16.4693	850732	PASS	Austria_EN_LBK		Neolithic_Europe_pooled
I5205	F	Austria_EN_LBK	5000	5500-4500BCE	Austria	48.5798	16.4693	831792	PASS	Austria_EN_LBK		Neolithic_Europe_pooled
I5206	F	Austria_EN_LBK	5000	5500-4500BCE	Austria	48.5798	16.4693	811457	PASS	Austria_EN_LBK		Neolithic_Europe_pooled
I5207	M	Austria_EN_LBK	5000	5500-4500BCE	Austria	48.5798	16.4693	924723	PASS	Austria_EN_LBK		Neolithic_Europe_pooled
I5208	F	Austria_EN_LBK	5000	5500-4500BCE	Austria	48.5798	16.4693	899049	PASS	Austria_EN_LBK		Neolithic_Europe_pooled
I0781	F	Bulgaria_C	4454	4537-4367calBCE(5632±24BP,MAMS-28134)	Bulgaria	42.2322	24.2627	461034	PASS	Balkans_C
I0785	F	Bulgaria_C	4403	4451-4354calBCE(5578±23BP,MAMS-28135)	Bulgaria	42.2322	24.2627	76347	PASS	Balkans_C
I2423	F	Bulgaria_C	4431	4536-4354calBCE(5610±40BP,Poz-83493)	Bulgaria	43.0578	26.9836	499639	PASS	Balkans_C
I2424	F	Bulgaria_C	4338	4445-4253calBCE(5490±40BP,Poz-93494)	Bulgaria	43.0578	26.9836	652285	PASS	Balkans_C
I2425	F	Bulgaria_C	4525	4676-4407calBCE(5690±40BP,Poz-83662)	Bulgaria	43.0589	26.7672	213091	PASS	Balkans_C
I2427	F	Bulgaria_C	4376	4446-4331calBCE(5520±30BP,Beta-432805)	Bulgaria	43.0589	26.7672	661216	PASS	Balkans_C
I2430	M	Bulgaria_C	4498	4602-4403calBCE(5670±30BP,Beta-432806)	Bulgaria	43.0578	26.9836	617793	PASS	Balkans_C
I2431	M	Bulgaria_C	4674	4784-4552calBCE(5820±30BP,Beta-432807)	Bulgaria	43.0992	26.7194	738279	PASS(Xcontam=[0.005,0.011],damage.ss.half=0.048)	Balkans_C
I2526	F	Bulgaria_C	5343	5468-5225calBCE(6370±25BP,PSUAMS-2342)	Bulgaria	43.1395	25.6102	373136	PASS	Balkans_C
ANI152	M	Bulgaria_Varna_C	4525	4678-4371calBCE[unionoftwodates:4678-4458calBCE(5720±29BP,OxA13685);4580-4371calBCE(5662±27BP,MAMS-15095)]	Bulgaria	43.2131	27.8644	26224	PASS	Balkans_C
ANI159-ANI181	M	Bulgaria_Varna_C	4616	4714-4506calBCE(5766±36BP,OxA13848)	Bulgaria	43.2131	27.8644	419597	PASS	Balkans_C
ANI160	M	Bulgaria_Varna_C	4583	4684-4494calBCE(5735±31BP,OxA-24041)	Bulgaria	43.2131	27.8644	62189	PASS	Balkans_C
I2792	M	Croatia_Vucedol	2726	2872-2580calBCE(4130±35BP,Poz-90126)	Croatia	45.3356	19.0605	191104	PASS(mtcontam=[0.967,0.976])	Balkans_C
I4088	F	Romania_C_Bodrogkeresztur	4241	4332-4064calBCE(5380±25BP,PSUAMS-1832)	Romania	47.7467	22.395	699220	PASS(mtcontam=[0.933,0.95])	Balkans_C
I4089	M	Romania_C_Bodrogkeresztur	3686	3765-3640calBCE(4915±25BP,PSUAMS-1746)	Romania	47.7467	22.395	784776	PASS(Xcontam=[0.009,0.016])	Balkans_C
Bul6	M	Bulgaria_BeliBreyag_EBA	2500	3400-1600BCE	Bulgaria	42.4296	25.8984	370439	PASS	Balkans_EBA
Bul8	M	Bulgaria_BeliBreyag_EBA	2500	3400-1600BCE	Bulgaria	42.4296	25.8984	18337	PASS	Balkans_EBA
I2175	M	Bulgaria_EBA	3147	3335-2932calBCE(4445±35BP,Ly-5515)	Bulgaria	43.0578	26.9836	423781	PASS	Balkans_EBA
I2520	M	Bulgaria_EBA	3203	3336-3029calBCE(4470±25BP,PSUAMS-1814)	Bulgaria	43.1609	25.8834	795071	PASS(batch.flag)	Balkans_EBA
I3499	M	Croatia_LateC_EBA_Vucedol	2768	2885-2635calBCE(4176±28BP,BRAMS-1304)	Croatia	45.3388	18.6989	421376	PASS(substantial.popgen.outlier,mtcontam=[0.964,0.977],Xcontam=[0,0.01])	Balkans_EBA
I4175	F	Croatia_LateC_EBA_Vucedol	2850	3000-2700BCE	Croatia	45.3356	19.0605	56984	PASS	Balkans_EBA
I5071	F	Croatia_EN_Impressa	5632	5708-5566calBCE(6720±20BP,UCIAMS-174934)	Croatia	43.3514	16.4618	497606	PASS	Balkans_EN
I5072	M	Croatia_EN_Impressa	5595	5657-5558calBCE(6685±20BP,UCIAMS-174935)	Croatia	43.3514	16.4618	643045	PASS	Balkans_EN
I2532	M	Romania_EN	5664	5721-5623calBCE(6755±30BP,PSUAMS-1747)	Romania	45.466	27.01	708400	PASS	Balkans_EN
I2533	F	Romania_EN	5421	5480-5372calBCE(6470±30BP,PSUAMS-1748)	Romania	44.2667	23.9	766906	PASS(mtcontam=[0.96,0.979])	Balkans_EN
I0633	M	Serbia_EN	5474	5610-5376calBCE(6520±40BP,Poz-82186)	Serbia	44.9	19.75	632128	PASS(Xcontam=0.008,mtcontam=[0.945,0.964])	Balkans_EN
I0634	M	Serbia_EN	4610	4712-4502calBCE(5760±40BP,Poz-82185)	Serbia	44.9	19.75	888440	PASS(Xcontam=0.006)	Balkans_EN
I1131	M	Serbia_EN	4532	4653-4452calBCE(5700±30BP,Beta-432798)	Serbia	44.9	19.75	776289	PASS	Balkans_EN
I4918	F	Serbia_EN_Starcevo	5650	6000-5300BCE	Serbia	44.4864	21.0761	816992	PASS	Balkans_EN
I2163	M	Bulgaria_MLBA	1689	1866-1615calBCE(3400±30BP,Beta-432796)	Bulgaria	42.1329	25.4963	825494	PASS	Balkans_LBA
I4331	M	Croatia_MBA	1569	1618-1517calBCE(3305±20BP,PSUAMS-2257)	Croatia	43.194	17.344	725669	PASS	Balkans_MBA
I4332	F	Croatia_MBA	1558	1613-1508calBCE(3290±20BP,PSUAMS-2258)	Croatia	43.194	17.344	730118	PASS	Balkans_MBA
I3498	M	Croatia_MN_Sopot	5731	5834-5656calBCE(6850±40BP,Poz-90129)	Croatia	45.3388	18.6989	502718	PASS	Balkans_MN
I4168	F	Croatia_MN_Sopot	4638	4777-4538calBCE(5790±40BP,Poz-90128)	Croatia	45.3388	18.6989	197793	PASS	Balkans_MN
I5077	M	Croatia_MN_Sopot	5051	5208-4942calBCE(6110±25BP,PSUAMS-2691)	Croatia	45.551	18.7466	848742	PASS	Balkans_MN
I5078	M	Croatia_MN_Sopot	4621	4699-4545calBCE(5770±25BP,PSUAMS-2615)	Croatia	45.551	18.7466	857438	PASS	Balkans_MN
I1113	F	Bulgaria_MalakPreslavets_N	6026	6076-5928calBCE(7162±35BP,OxA-32532)	Bulgaria	43.98	26.4	236110	PASS	Balkans_N
I1295	M	Bulgaria_MalakPreslavets_N	5793	5885-5723calBCE(6914±34BP,OxA-32542)	Bulgaria	43.98	26.4	152930	PASS	Balkans_N
I1297	F	Bulgaria_MalakPreslavets_N	5684	5731-5631calBCE(6795±35BP,OxA-32547)	Bulgaria	43.98	26.4	118702	PASS	Balkans_N
I0706	M	Bulgaria_N	5949	6025-5847calBCE(7075±37BP,OxA-32777)	Bulgaria	43.1609	25.8834	254318	PASS	Balkans_N
I2521	M	Bulgaria_N	5553	5621-5481calBCE(6615±30BP,PSUAMS-1836)	Bulgaria	43.1609	25.8834	802956	PASS	Balkans_N
I0698_published	M	Bulgaria_N_published	5950	6000-5900BCE	Bulgaria	42.1	25.75	727428	PASS	Balkans_N
I0704_published	F	Bulgaria_N_published	5942	6059-5839calBCE(7070±50BP,Poz-81119)	Bulgaria	43.1609	25.8834	97292	PASS	Balkans_N
I1298_published	F	Bulgaria_N_published	5933	6057-5805calBCE(7060±50BP,Poz-81112)	Bulgaria	43.3743	23.7293	96851	PASS(mtcontam=0.98andfemale)	Balkans_N
I2529_published	M	Bulgaria_N_published	5660	5723-5571calBCE(6750±40BP,Poz-81117)	Bulgaria	42.1	25.75	629247	PASS	Balkans_N
I4167	M	Croatia_N_Starcevo	4685	4792-4552calBCE(5830±40BP,Poz-90127)	Croatia	45.3388	18.6989	59261	PASS	Balkans_N
I5079	F	Croatia_N_Starcevo	3471	3651-3110calBCE(4700±90BP,Beta-187421)	Croatia	45.4885	17.6413	812932	PASS	Balkans_N
I0676	M	Macedonia_N	5842	5979-5732calBCE(6960±50BP,Poz-82188)	NorthMacedonia	41.9	21.35	860846	PASS(Xcontam=0.006)	Balkans_N
KK1.SG	M	Georgia_Kotias.SG	7728	7940-7599BCE(8723±35BP)[R_combine:(8665±65BP,RTT-5246);(8745±40BP,OxA-28256)]	Georgia	42.28	43.28	1180629	PASS(literature)	CHG
SATP.SG	M	Georgia_Satsurblia.SG	11332	11461-11225calBCE(11415±50BP,OxA-34632)	Georgia	42.38	42.59	816136	PASS(literature)	CHG
I7949	M	Czech_BA_Veterov_1	1072	1192-1005calBCE(2890±20BP,PSUAMS-6927)	CzechRepublic	50.5481	13.7761	857331	PASS	Czech_BA_Veterov_1
I6677	M	Czech_Baalberge	3600	3800-3400BCE	CzechRepublic	50.5481	13.7761	873182	PASS	Czech_Baalberge		Neolithic_Europe_pooled
I4136	F	Czech_BellBeaker	2300	2800-1800BCE	CzechRepublic	50.118	14.258	244653	PASS	Czech_BellBeaker
I4145	M	Czech_BellBeaker	2139	2282-2032calBCE(3740±35BP,Poz-84460)	CzechRepublic	50.118	14.258	92728	PASS	Czech_BellBeaker
I4885	M	Czech_BellBeaker	2220	2291-2142calBCE(3790±20BP,PSUAMS-2843)	CzechRepublic	50.1217	14.457	816324	PASS(mtcontam=[0.955,0.976])	Czech_BellBeaker
I4886	M	Czech_BellBeaker	2138	2270-2039calBCE(3740±20BP,PSUAMS-2844)	CzechRepublic	50.1217	14.457	846480	PASS	Czech_BellBeaker
I4888	M	Czech_BellBeaker	2088	2195-2027calBCE(3700±20BP,PSUAMS-2846)	CzechRepublic	50.1217	14.457	833166	PASS	Czech_BellBeaker
I4889	M	Czech_BellBeaker	2181	2284-2056calBCE(3765±20BP,PSUAMS-2847)	CzechRepublic	50.1217	14.457	848054	PASS	Czech_BellBeaker
I4890	M	Czech_BellBeaker	2300	2800-1800BCE	CzechRepublic	50.1217	14.457	37650	PASS	Czech_BellBeaker
I4891	M	Czech_BellBeaker	2181	2284-2056calBCE(3765±20BP,PSUAMS-2848)	CzechRepublic	50.1217	14.457	841976	PASS	Czech_BellBeaker
I4895	M	Czech_BellBeaker	2156	2276-2042calBCE(3750±20BP,PSUAMS-2852)	CzechRepublic	50.0504	14.3667	814836	PASS	Czech_BellBeaker
I4896	F	Czech_BellBeaker	2213	2289-2141calBCE(3785±20BP,PSUAMS-2853)	CzechRepublic	50.0504	14.3667	806027	PASS	Czech_BellBeaker
I4945	F	Czech_BellBeaker	2227	2293-2143calBCE(3795±20BP,PSUAMS-2854)	CzechRepublic	50.1217	14.457	520595	PASS	Czech_BellBeaker
I4946	F	Czech_BellBeaker	2238	2336-2144calBCE(3805±20BP,PSUAMS-2801)	CzechRepublic	50.0504	14.3667	367621	PASS(damage.ds.half=0.038)	Czech_BellBeaker
I5514	M	Czech_BellBeaker	2205	2287-2140calBCE(3780±20BP,PSUAMS-2864)	CzechRepublic	50.0504	14.3667	861406	PASS	Czech_BellBeaker
I5666	M	Czech_BellBeaker	2300	2800-1800BCE	CzechRepublic	50.274	15.8139	285530	PASS	Czech_BellBeaker
I6468	F	Czech_BellBeaker	2200	2500-1900BCE	CzechRepublic	50.1667	14.3167	48724	PASS	Czech_BellBeaker
I6476	F	Czech_BellBeaker	2150	2500-1800BCE	CzechRepublic	50.5095	14.0445	24307	PASS	Czech_BellBeaker
I6480	M	Czech_BellBeaker	2200	2500-1900BCE	CzechRepublic	50.1667	14.3167	428162	PASS	Czech_BellBeaker
I7211	F	Czech_BellBeaker	2233	2296-2143calBCE(3800±20BP,PSUAMS-4345)	CzechRepublic	50.4103	14.0746	753333	PASS	Czech_BellBeaker
I7212	M	Czech_BellBeaker	2297	2454-2201calBCE(3840±25BP,PSUAMS-4346)	CzechRepublic	50.4103	14.0746	747056	PASS	Czech_BellBeaker
I7213	F	Czech_BellBeaker	2281	2440-2201calBCE(3835±20BP,PSUAMS-4347)	CzechRepublic	50.4103	14.0746	739544	PASS	Czech_BellBeaker
I7214	F	Czech_BellBeaker	2250	2500-2000BCE	CzechRepublic	50.4103	14.0746	752197	PASS	Czech_BellBeaker
I7249	M	Czech_BellBeaker	2061	2138-1973calBCE(3670±20BP,PSUAMS-4499)	CzechRepublic	50.19	14.158	779011	PASS	Czech_BellBeaker
I7250	F	Czech_BellBeaker	2250	2500-2000BCE	CzechRepublic	50.19	14.158	156642	PASS	Czech_BellBeaker
I7251	M	Czech_BellBeaker	2250	2500-2000BCE	CzechRepublic	50.19	14.158	756643	PASS	Czech_BellBeaker
I7269	M	Czech_BellBeaker	2250	2500-2000BCE	CzechRepublic	50.19	14.158	703041	PASS	Czech_BellBeaker
I7270	F	Czech_BellBeaker	2250	2500-2000BCE	CzechRepublic	50.19	14.158	41141	PASS	Czech_BellBeaker
I7275	M	Czech_BellBeaker	2250	2500-2000BCE	CzechRepublic	50.19	14.158	708042	PASS(Xcontam=[0.005,0.012])	Czech_BellBeaker
I7276	M	Czech_BellBeaker	2250	2500-2000BCE	CzechRepublic	50.19	14.158	765003	PASS	Czech_BellBeaker
I7278	M	Czech_BellBeaker	2383	2462-2298calBCE(3890±20BP,PSUAMS-4349)	CzechRepublic	50.19	14.158	795922	PASS(Xcontam=[0.005,0.011])	Czech_BellBeaker
I7281	F	Czech_BellBeaker	2244	2340-2146calBCE(3810±20BP,PSUAMS-4350)	CzechRepublic	50.045	14.3393	744708	PASS	Czech_BellBeaker
I7282	M	Czech_BellBeaker	2250	2500-2000BCE	CzechRepublic	50.4103	14.0746	785327	PASS(Xcontam=[0.005,0.01])	Czech_BellBeaker
I7286	M	Czech_BellBeaker	2271	2403-2199calBCE(3830±20BP,PSUAMS-4352)	CzechRepublic	50.4103	14.0746	799421	PASS	Czech_BellBeaker
I7287	M	Czech_BellBeaker	2250	2500-2000BCE	CzechRepublic	50.4103	14.0746	637279	PASS	Czech_BellBeaker
I7288	M	Czech_BellBeaker	2250	2500-2000BCE	CzechRepublic	50.4103	14.0746	91070	PASS	Czech_BellBeaker
I7290	F	Czech_BellBeaker	2250	2500-2000BCE	CzechRepublic	50.4103	14.0746	796476	PASS	Czech_BellBeaker
I6695	F	Czech_CordedWare	2625	2900-2350BCE	CzechRepublic	50.5481	13.7761	818786	PASS	Czech_CordedWare
I6696	M	Czech_CordedWare	2625	2900-2350BCE	CzechRepublic	50.5429	14.0659	850315	PASS	Czech_CordedWare
I7207	M	Czech_CordedWare	2420	2561-2306calBCE(3935±25BP,PSUAMS-3887)	CzechRepublic	50.4103	14.0746	789641	PASS	Czech_CordedWare
I7208	M	Czech_CordedWare	2374	2464-2290calBCE(3885±25BP,PSUAMS-3888)	CzechRepublic	50.4103	14.0746	811518	PASS	Czech_CordedWare
I7209	M	Czech_CordedWare	2319	2456-2204calBCE(3850±25BP,PSUAMS-4026)	CzechRepublic	50.4103	14.0746	869434	PASS	Czech_CordedWare
I7279	M	Czech_CordedWare	2250	2500-2000BCE	CzechRepublic	50.19	14.158	636343	PASS	Czech_CordedWare
I7280	M	Czech_CordedWare	2250	2500-2000BCE	CzechRepublic	50.19	14.158	780479	PASS	Czech_CordedWare
RISE568.SG	F	Czech_EarlySlav.SG	-750	600-900CE	CzechRepublic	50.19	14.158	60816	PASS(literature)	Czech_EarlySlav.SG
I4884	M	Czech_EBA	1808	1882-1742calBCE(3480±20BP,PSUAMS-2842)	CzechRepublic	50.1217	14.457	854624	PASS	Czech_EBA
I4892	F	Czech_EBA	1804	1881-1700calBCE(3475±20BP,PSUAMS-2849)	CzechRepublic	50.1217	14.457	808531	PASS	Czech_EBA
I7195	F	Czech_EBA	2300	2800-1800BCE	CzechRepublic	50.0504	14.3667	685817	PASS(extraction.negative.flag)	Czech_EBA
I7198	F	Czech_EBA	2076	2193-1977calBCE(3685±25BP,PSUAMS-3885)	CzechRepublic	50.0504	14.3667	767682	PASS(extraction.negative.flag)	Czech_EBA
I7200	F	Czech_EBA	2300	2800-1800BCE	CzechRepublic	50.0504	14.3667	735642	PASS(extraction.negative.flag)	Czech_EBA
I7201	F	Czech_EBA	2300	2800-1800BCE	CzechRepublic	50.0504	14.3667	689010	PASS(extraction.negative.flag)	Czech_EBA
I7203	M	Czech_EBA	2300	2800-1800BCE	CzechRepublic	50.0504	14.3667	75377	PASS(extraction.negative.flag)	Czech_EBA
I5037	M	Czech_EBA_Protounetice	2150	2300-2000BCE	CzechRepublic	48.8019	17.0233	19614	PASS	Czech_EBA_Protounetice
I5042	M	Czech_EBA_Protounetice	2150	2300-2000BCE	CzechRepublic	48.8019	17.0233	70530	PASS	Czech_EBA_Protounetice
I4130	F	Czech_EBA_Unetice	2300	2800-1800BCE	CzechRepublic	48.8019	17.0233	223780	PASS	Czech_EBA_Unetice
I4141	M	Czech_EBA_Unetice	2300	2800-1800BCE	CzechRepublic	48.8019	17.0233	292948	PASS	Czech_EBA_Unetice
kol6-ALL_DATA.SG	F	Czech_Megalithic.SG	4825	4929-4726calBCE(5950±25BP,UGAMS-9615)	CzechRepublic	50.0289	15.2012	777676	PASS(literature)	Czech_Megalithic.SG		Neolithic_Europe_pooled
I4893	M	Czech_N	4395	4446-4347calBCE(5550±20BP,PSUAMS-2850)	CzechRepublic	50.1217	14.457	836569	PASS	Czech_N		Neolithic_Europe_pooled
I4894	F	Czech_N	4421	4494-4361calBCE(5610±20BP,PSUAMS-2851)	CzechRepublic	50.1217	14.457	816890	PASS	Czech_N		Neolithic_Europe_pooled
RISE21.SG	M	Denmark_BA.SG	1351	1426-1272calBCE(3092±29BP,OxA-28047)	Denmark	55.55	12.209	26670	PASS(literature)	Denmark_BA.SG
RISE47.SG	M	Denmark_BA.SG	1430	1499-1322calBCE(3153±26BP,OxA-28258)	Denmark	56.97	9.552	102112	PASS(literature)	Denmark_BA.SG
RISE276.SG	M	Denmark_LBA.SG	662	789-546calBCE(2525±25BP,OxA-30485)	Denmark	55.914	11.565	91597	PASS(literature)	Denmark_LBA.SG
VK214.SG	F	Denmark_LN_BA.SG	1888	2011-1774calBCE(3553±26BP,AAR-23143)	Denmark	55.73	12.12	141507	PASS(literature)	Denmark_LN_BA.SG
RISE42.SG	M	Denmark_LN.SG	2071	2193-1971calBCE(3681±28BP,OxA-28225)	Denmark	55.657	12.148	18471	PASS(literature)	Denmark_LN.SG
RISE71.SG	F	Denmark_LN.SG	2090	2197-1983calBCE(3701±26BP,OxA-28269)	Denmark	56.676	10.034	198510	PASS(literature)	Denmark_LN.SG
RISE61.SG	M	Denmark_MN_B.SG	2619	2848-2492calBCE(4071±27BP,OxA-28296)	Denmark	55.703	11.855	287949	PASS(literature)	Denmark_MN_B.SG
Bon001.SG	M	Turkey_Boncuklu_N.SG	8082	8212-7952calBCE(Ba-120539)	Turkey	37.7519	32.8649	84559	PASS(literature)	Early_Anatolian_farmers
Bon002.SG	F	Turkey_Boncuklu_N.SG	8128	8279-7977calBCE(Wk-29763)	Turkey	37.7519	32.8649	1077088	PASS(literature)	Early_Anatolian_farmers
Bon004.SG	M	Turkey_Boncuklu_N.SG	8125	8300-7950BCE	Turkey	37.7519	32.8649	122039	PASS(literature)	Early_Anatolian_farmers
Bon005.SG	F	Turkey_Boncuklu_N.SG	8270	8300-8240calBCE(Wk-43898)	Turkey	37.7519	32.8649	21337	PASS(literature)	Early_Anatolian_farmers
ZHAG_BON004.A0101_Luk10	F	Turkey_Central_N	7950	8300-7600BCE	Turkey	37.75	32.8667	772944	PASS(literature)	Early_Anatolian_farmers
ZHAJ_BON034.A0101_Luk9	F	Turkey_Central_N	7950	8300-7600BCE	Turkey	37.75	32.8667	486511	PASS(literature)	Early_Anatolian_farmers
ZHJ_BON024.A0101_Luk84	F	Turkey_Central_N	8240	8269-8210calBCE(PKUAMS-120541)	Turkey	37.75	32.8667	529709	PASS(literature)	Early_Anatolian_farmers
ZKO_BON001.A0101_Luk7	M	Turkey_Central_N	7950	8300-7600BCE	Turkey	37.75	32.8667	592138	PASS(literature)	Early_Anatolian_farmers
ZMOJ_BON014.A0101_Luk21	M	Turkey_Central_N	7950	8300-7600BCE	Turkey	37.75	32.8667	529618	PASS(literature)	Early_Anatolian_farmers
UzOO77	F	Russia_EHG	5250	5500-5000BCE	Russia	62.046	35.364	533249	PASS(literature)	EHG		EHG_pooled
I0061	M	Russia_HG_Karelia	6500	7050-5950BCE	Russia	61.65	35.65	1025148	PASS(Xcontam=0.005)	EHG		EHG_pooled
I0211	M	Russia_HG_Karelia	6500	7050-5950BCE	Russia	61.65	35.65	146885	PASS	EHG		EHG_pooled
I0124	M	Russia_HG_Samara	5594	5660-5535calBCE(6680±30BP,Beta-392490)	Russia	53.6806	50.6753	477876	PASS	EHG		EHG_pooled
Popovo2	M	Russia_Popovo_HG	6250	7500-5000BCE	Russia	61.264	38.905	66188	PASS(literature)	EHG		EHG_pooled
Sidelkino.SG	F	Russia_Sidelkino_HG.SG	9506	9776-9235calBCE[unionoftwodates:9443-9235calBCE(9836±48BP,UBA-31465);9776-9317calBCE(9995±50BP,PSUAMS-6189)]	Russia	54.53	51.11	967604	PASS(literature)	EHG		EHG_pooled
I1763	M	Ukraine_Mesolithic	8131	8282-7960calBCE(8960±50BP,Poz-81127)	Ukraine	47.4342	35.2764	831221	PASS	EHG		EHG_pooled
I1819	M	Ukraine_Mesolithic	8708	9107-8556calBCE(9420±50BP,Poz-81128)	Ukraine	47.4342	35.2764	813114	PASS(mtcontam=[0.948,0.968])	EHG		EHG_pooled
I5876	M	Ukraine_Mesolithic	6882	7040-6699calBCE(7960±30BP,PSUAMS-2811)	Ukraine	48.9142	33.7649	475706	PASS	EHG		EHG_pooled
I1770	F	England_BellBeaker	2000	2400-1600BCE	GreatBritain	54.2019	-0.434355	483474	PASS	England_BellBeaker
I2418	F	England_BellBeaker	2287	2452-2200calBCE(3835±25BP,NZA-32788)	GreatBritain	51.16	-1.77	656573	PASS(damage.ds.half=0.042)	England_BellBeaker
I2443	F	England_BellBeaker	2141	2286-2028calBCE(3740±40BP,OxA-8868)	GreatBritain	51.7957	-1.31989	894847	PASS	England_BellBeaker
I2445	M	England_BellBeaker	2098	2200-1985calBCE(3709±27BP)[R_combine:(3650±35BP,Poz-83407);(3785±40BP,OxA-8806)]	GreatBritain	51.7957	-1.31989	854563	PASS	England_BellBeaker
I2447	M	England_BellBeaker	1988	2120-1898calBCE(3625±25BP,PSUAMS-2336)	GreatBritain	51.7957	-1.31989	913061	PASS(Xcontam=[0.006,0.016])	England_BellBeaker
I2450	F	England_BellBeaker	2298	2455-2200calBCE(3838±30BP)[R_combine:(3850±21BP);(3841±40BP,NZA-15865);(3834±45BP,NZA-15866)]	GreatBritain	51.68	-1.297	904314	PASS	England_BellBeaker
I2452	M	England_BellBeaker	2102	2199-2032calBCE(3715±23BP)[R_combine:(3735±35BP,Poz-83405);(3700±30BP,Beta-444979)]	GreatBritain	52.15	-0.38	913255	PASS	England_BellBeaker
I2453	M	England_BellBeaker	2172	2290-2038calBCE(3760±35BP,Poz-83404)	GreatBritain	52.67	-0.35	610725	PASS	England_BellBeaker
I2455	F	England_BellBeaker	1998	2128-1900calBCE(3631±28BP,OxA-24594)	GreatBritain	52.34	0.03	120698	PASS	England_BellBeaker
I3255	F	England_BellBeaker	2044	2139-1947calBCE(3661±31BP,SUERC-49482)	GreatBritain	52.1703	0.105604	861509	PASS	England_BellBeaker
I3256	M	England_BellBeaker	2113	2269-2027calBCE(3722±31BP)	GreatBritain	52.1703	0.105604	843389	PASS	England_BellBeaker
I4950	M	England_BellBeaker	2300	2800-1800BCE	GreatBritain	51.2899	-1.80723	777787	PASS	England_BellBeaker
I4951	M	England_BellBeaker	2300	2800-1800BCE	GreatBritain	51.24	-1.76	181249	PASS	England_BellBeaker
I5382	M	England_BellBeaker	2120	2282-1980calBCE(3725±40BP,OxA-8728)	GreatBritain	54.5228	-1.30813	321701	PASS	England_BellBeaker
I5512	F	England_BellBeaker	2300	2800-1800BCE	GreatBritain	51.24	-1.76	863895	PASS	England_BellBeaker
I5513	M	England_BellBeaker	2300	2800-1800BCE	GreatBritain	51.22	-1.77	816408	PASS	England_BellBeaker
I6679	M	England_BellBeaker	1986	2129-1889calBCE(3621±34BP,OxA-5553/4)	GreatBritain	55.31	-1.55333	186564	PASS	England_BellBeaker
I6775	M	England_BellBeaker	2200	2500-1900BCE	GreatBritain	51.1213	-3.07565	670798	PASS(Xcontam=[0.007,0.016])	England_BellBeaker
I6778	F	England_BellBeaker	2200	2500-1900BCE	GreatBritain	51.1471	-1.81253	580860	PASS	England_BellBeaker
I2421	M	England_C_EBA	1840	1935-1751calBCE(3524±28BP,OxA-26256)	GreatBritain	54.883	-1.452	393274	PASS	England_C_EBA
I2457	M	England_C_EBA	2106	2201-2029calBCE(3717±28BP,SUERC-69975)	GreatBritain	51.16	-1.77	718630	PASS	England_C_EBA
I2460	F	England_C_EBA	1925	2024-1782calBCE(3575±27BP,SUERC-53041)	GreatBritain	51.16	-1.77	23341	PASS	England_C_EBA
I2461	F	England_C_EBA	2025	2150-1900BCE	GreatBritain	51.13	-1.69	771469	PASS	England_C_EBA
I2463	F	England_C_EBA	1824	1930-1701calBCE(3505±35BP,SUERC-40721)	GreatBritain	51.33	1.36	234559	PASS	England_C_EBA
I2464	M	England_C_EBA	1665	1746-1544calBCE(3379±30BP,NZA-28700)	GreatBritain	51.15	-1.75	52649	PASS	England_C_EBA
I2566	M	England_C_EBA	2128	2267-2036calBCE(3734±25BP,NZA-32490)	GreatBritain	51.16	-1.77	485091	PASS	England_C_EBA
I2597	M	England_C_EBA	2130	2276-2033calBCE(3735±30BP,SUERC-34539)	GreatBritain	51.16	-1.77	824991	PASS	England_C_EBA
I2601	F	England_C_EBA	1858	1960-1747calBCE(3535±35BP,SUERC-40713)	GreatBritain	51.33	1.36	498474	PASS	England_C_EBA
I2602	M	England_C_EBA	1812	1892-1699calBCE(3490±30BP,SUERC-40290)	GreatBritain	51.33	1.36	641305	PASS	England_C_EBA
I2604	F	England_C_EBA	2123	2272-2032calBCE(3730±30BP,SUERC-26241)	GreatBritain	51.15	-1.36	760401	PASS	England_C_EBA
I2609	F	England_C_EBA	1898	2026-1769calBCE(3560±40BP,Poz-83423)	GreatBritain	54.979	-2.123	273312	PASS	England_C_EBA
I2610	F	England_C_EBA	1833	1939-1743calBCE(3515±35BP,Poz-83498)	GreatBritain	54.97	-1.73	78777	PASS(mtcontam=[0.95,0.975])	England_C_EBA
I2612	F	England_C_EBA	2343	2462-2206calBCE(3865±35BP,Poz-83492)	GreatBritain	54.883	-1.452	55173	PASS	England_C_EBA
I2618	M	England_C_EBA	2043	2137-1950calBCE(3660±28BP,OxA-26254)	GreatBritain	55.058	-2.147	643010	PASS	England_C_EBA
I5377	M	England_C_EBA	1808	1895-1693calBCE(3485±33BP,OxA-14731)	GreatBritain	51.4712	-0.266408	836940	PASS	England_C_EBA
I5441	M	England_C_EBA	1800	2000-1600BCE	GreatBritain	50.4261	-3.58054	215435	PASS	England_C_EBA
I6777	M	England_C_EBA	2100	2300-1900BCE	GreatBritain	51.1471	-1.81253	783327	PASS(Xcontam=[0.005,0.01])	England_C_EBA
I7569	F	England_C_EBA	1534	1615-1453calBCE(3266±30BP,SUERC-74472)	GreatBritain	52.6963	-0.34	55212	PASS(extraction.negative.flag)	England_C_EBA
I7570	M	England_C_EBA	1619	1736-1534calBCE(3347±30BP,SUERC-74471)	GreatBritain	52.6963	-0.34	776537	PASS(extraction.negative.flag,Xcontam=[0.006,0.012])	England_C_EBA
I7573	F	England_C_EBA	1570	1625-1507calBCE(3306±27BP,SUERC-44496)	GreatBritain	52.3106	0.386227	709969	PASS(extraction.negative.flag)	England_C_EBA
I7630	M	England_C_EBA	1784	1881-1689calBCE(3458±27BP,SUERC-72661,GU43493)	GreatBritain	53.7262	-0.529641	17171	PASS	England_C_EBA
I7635	F	England_C_EBA	2080	2196-1976calBCE(3690±28BP,BRAMS-1286)	GreatBritain	54.5228	-1.30813	482834	PASS	England_C_EBA
I7639	F	England_C_EBA	1847	2033-1635calBCE(3520±70BP,HAR-3880)	GreatBritain	52.2769	0.461902	59621	PASS(damage.ds.half=0.048)	England_C_EBA
I2598_published	M	England_C_EBA_published	2048	2139-1950calBCE(3664±30BP,NZA-32494)	GreatBritain	51.16	-1.77	85900	PASS	England_C_EBA_published
I7578	F	England_LBA	1130	1256-1013calBCE(2930±35BP,SUERC-25497)	GreatBritain	52.1224	-0.511365	775926	PASS(extraction.negative.flag)	England_LBA
I7628	M	England_LBA	1083	1212-983calBCE(2895±35BP,SUERC-25541)	GreatBritain	52.1224	-0.511365	409042	PASS	England_LBA
I2639	F	England_MBA	1480	1532-1435calBCE(3225±25BP,NZA-32497)	GreatBritain	51.16	-1.77	579584	PASS	England_MBA
I7568	F	England_MBA	1450	1600-1300BCE	GreatBritain	52.34	0.03	769990	PASS(extraction.negative.flag)	England_MBA
I7572	M	England_MBA	1430	1507-1306calBCE(3160±40BP,SUERC-28365)	GreatBritain	52.34	0.03	653485	PASS(extraction.negative.flag)	England_MBA
I7574	F	England_MBA	1321	1408-1226calBCE(3055±30BP,SUERC-38250)	GreatBritain	52.1784	0.122544	789405	PASS(extraction.negative.flag,mtcontam=[0.963,0.979])	England_MBA
I7577	M	England_MBA	1248	1386-1123calBCE(3005±35BP,SUERC-25499)	GreatBritain	52.1224	-0.511365	778782	PASS(extraction.negative.flag,Xcontam=[0.005,0.011])	England_MBA
I7626	F	England_MBA	1281	1399-1130calBCE(3025±35BP,SUERC-25533)	GreatBritain	52.1224	-0.511365	768487	PASS	England_MBA
I7627	F	England_MBA	1318	1412-1222calBCE(3055±35BP,SUERC-25538)	GreatBritain	52.1224	-0.511365	780131	PASS	England_MBA
I7640	M	England_MBA	1357	1434-1278calBCE(3100±30BP,SUERC-28349)	GreatBritain	52.1784	0.122544	801057	PASS	England_MBA
I0518	M	England_N	3230	3360-3100BCE	GreatBritain	52.2173	-0.940217	44718	PASS	England_N
I0519	M	England_N	3230	3360-3100BCE	GreatBritain	52.2173	-0.940217	87139	PASS	England_N
I0520	M	England_N	3230	3360-3100BCE	GreatBritain	52.2173	-0.940217	16895	PASS	England_N
I2605	F	England_N	3283	3628-2938calBCE[unionoftwodates:3628-3373calBCE(4710±35BP,Poz-83483);3370-2938calBCE(4500±60BP,BM-3173)]	GreatBritain	51.4928	-0.665402	609777	PASS	England_N
I2606	M	England_N	3115	3330-2900BCE	GreatBritain	51.4928	-0.665402	676373	PASS	England_N
I3005	F	England_N	3707	3781-3643calBCE(4934±35BP,OxA-34336)	GreatBritain	51.3247	-2.75325	652889	PASS(batch.flag,mtcontam=[0.954,0.968])	England_N
I5366	F	England_N	3566	3641-3384calBCE(4775±34BP,OxA-34470)	GreatBritain	50.8609	-0.399007	572989	PASS	England_N
I5374	M	England_N	2530	2663-2456calBCE(4008±39BP,OxA-16460)	GreatBritain	51.279	-2.74332	39969	PASS	England_N
I6746	F	England_N	3576	3697-3384calBCE(4809±45BP,UBA-30800)	GreatBritain	51.3247	-2.75325	605624	PASS	England_N
I6747	M	England_N	3578	3645-3526calBCE(4808±35BP,UB-29004)	GreatBritain	53.0798	-1.64094	841583	PASS	England_N
I6750	M	England_N	3700	3800-3600BCE	GreatBritain	51.0912	-1.72751	418242	PASS(damage.ds.half=0.043)	England_N
I6751	F	England_N	3700	3800-3600BCE	GreatBritain	51.0912	-1.72751	719644	PASS	England_N
I6753	M	England_N	3355	3730-2980BCE	GreatBritain	51.3216	0.372682	758295	PASS	England_N
I6757	M	England_N	3543	3642-3378calBCE(4766±48BP,UBA-32285)	GreatBritain	54.0817	-2.27362	821288	PASS	England_N
I6759	M	England_N	3577	3641-3526calBCE(4801±31BP)	GreatBritain	54.0744	-2.28728	774173	PASS(Xcontam=[0.008,0.015])	England_N
I6760	M	England_N	3831	3946-3710calBCE(5023±34BP,OxA-17173)	GreatBritain	51.8434	-1.85044	549556	PASS	England_N
I6761	F	England_N	3575	3650-3500BCE	GreatBritain	50.829	-0.112825	540029	PASS(mtcontam=[0.952,0.969])	England_N
I3040_all.SG	M	England_N_all.SG	3575	3650-3500BCE	GreatBritain	50.829	-0.112825	180801	PASS(literature)	England_N_all.SG
I5387_all.SG	M	England_N_all.SG	2900	3300-2500BCE	GreatBritain	51.2431	-1.51039	387141	PASS(literature)	England_N_all.SG
I6746_all.SG	F	England_N_all.SG	3576	3697-3384calBCE(4809±45BP,UBA-30800)	GreatBritain	51.3247	-2.75325	908673	PASS(literature)	England_N_all.SG
I6747_all.SG	M	England_N_all.SG	3578	3645-3526calBCE(4808±35BP,UB-29004)	GreatBritain	53.0798	-1.64094	1180398	PASS(literature)	England_N_all.SG
I6750_all.SG	M	England_N_all.SG	3700	3800-3600BCE	GreatBritain	51.0912	-1.72751	469508	PASS(literature)	England_N_all.SG
I6751_all.SG	F	England_N_all.SG	3700	3800-3600BCE	GreatBritain	51.0912	-1.72751	953729	PASS(literature)	England_N_all.SG
I6753_all.SG	M	England_N_all.SG	3355	3730-2980BCE	GreatBritain	51.3216	0.372682	936079	PASS(literature)	England_N_all.SG
I6755_all.SG	M	England_N_all.SG	3578	3644-3527calBCE(4808±32BP,OxA-13539)	GreatBritain	54.0744	-2.28728	504135	PASS(literature)	England_N_all.SG
I6760_all.SG	M	England_N_all.SG	3831	3946-3710calBCE(5023±34BP,OxA-17173)	GreatBritain	51.8434	-1.85044	752745	PASS(literature)	England_N_all.SG
I6762_all.SG	M	England_N_all.SG	3750	4000-3500BCE	GreatBritain	51.5611	-1.44592	632621	PASS(literature)	England_N_all.SG
I4949_published	M	England_N_published	3467	3624-3376calBCE(4715±20BP,PSUAMS-2513)	GreatBritain	51.445	-1.85261	76539	PASS	England_N_published
I3040.SG	M	England_N.SG	3575	3650-3500BCE	GreatBritain	50.829	-0.112825	137477	PASS(literature)	England_N.SG
I5374.SG	M	England_N.SG	2530	2663-2456calBCE(4008±39BP,OxA-16460)	GreatBritain	51.279	-2.74332	34646	PASS(literature)	England_N.SG
I5387.SG	M	England_N.SG	2900	3300-2500BCE	GreatBritain	51.2431	-1.51039	368346	PASS(literature)	England_N.SG
I6746.SG	F	England_N.SG	3576	3697-3384calBCE(4809±45BP,UBA-30800)	GreatBritain	51.3247	-2.75325	883038	PASS(literature)	England_N.SG
I6747.SG	M	England_N.SG	3578	3645-3526calBCE(4808±35BP,UB-29004)	GreatBritain	53.0798	-1.64094	887903	PASS(literature)	England_N.SG
I6750.SG	M	England_N.SG	3700	3800-3600BCE	GreatBritain	51.0912	-1.72751	466940	PASS(literature)	England_N.SG
I6751.SG	F	England_N.SG	3700	3800-3600BCE	GreatBritain	51.0912	-1.72751	940621	PASS(literature)	England_N.SG
I6753.SG	M	England_N.SG	3355	3730-2980BCE	GreatBritain	51.3216	0.372682	913658	PASS(literature)	England_N.SG
I6755.SG	M	England_N.SG	3578	3644-3527calBCE(4808±32BP,OxA-13539)	GreatBritain	54.0744	-2.28728	492542	PASS(literature)	England_N.SG
I6757.SG	M	England_N.SG	3543	3642-3378calBCE(4766±48BP,UBA-32285)	GreatBritain	54.0817	-2.27362	858108	PASS(literature)	England_N.SG
I6759.SG	M	England_N.SG	3577	3641-3526calBCE(4801±31BP)	GreatBritain	54.0744	-2.28728	817441	PASS(literature)	England_N.SG
I6760.SG	M	England_N.SG	3831	3946-3710calBCE(5023±34BP,OxA-17173)	GreatBritain	51.8434	-1.85044	727680	PASS(literature)	England_N.SG
I6761.SG	F	England_N.SG	3575	3650-3500BCE	GreatBritain	50.829	-0.112825	550153	PASS(literature)	England_N.SG
I6762.SG	M	England_N.SG	3750	4000-3500BCE	GreatBritain	51.5611	-1.44592	623029	PASS(literature)	England_N.SG
SB338B2_lib.SG	F	England_N.SG	3707	3781-3643calBCE(4934±35BP,OxA-34336)	GreatBritain	51.3247	-2.75325	617236	PASS(literature)	England_N.SG
SB379D2_lib.SG	M	England_N.SG	3583	3648-3528calBCE(4820±34BP,UBA-29003)	GreatBritain	53.0798	-1.64094	481183	PASS(literature)	England_N.SG
SB603A_lib.SG	F	England_N.SG	3566	3641-3384calBCE(4775±34BP,OxA-34470)	GreatBritain	50.8609	-0.399007	526217	PASS(literature)	England_N.SG
s19_0LS11_1.SG	M	Estonia_BA.SG	968	1103-845calBCE(2815±33BP,Hela-2361)	Estonia	59.4403	25.1349	196614	PASS(literature)	Estonia_BA.SG
s19_V14_2.SG	M	Estonia_BA.SG	1180	1274-1055calBCE(2966±29BP,SUERC-44064(GU29245)	Estonia	59.4972	25.5114	376317	PASS(literature)	Estonia_BA.SG
s19_V16_1.SG	M	Estonia_BA.SG	484	725-398calBCE(2399±27BP,UBA-24124)	Estonia	59.4306	24.9011	212488	PASS(literature)	Estonia_BA.SG
s19_V9_2.SG	M	Estonia_BA.SG	1122	1217-1016calBCE(2924±32BP,Hela-2365)	Estonia	59.4403	25.1349	390127	PASS(literature)	Estonia_BA.SG
s19_X02_1.SG	M	Estonia_BA.SG	987	1107-908calBCE(2834±28BP,SUERC-80017(GU47828)	Estonia	59.4564	24.9217	30950	PASS(literature)	Estonia_BA.SG
s19_X08_1.SG	M	Estonia_BA.SG	869	925-815calBCE(2733±26BP,SUERC-80021(GU47832)	Estonia	59.505	25.5281	269371	PASS(literature)	Estonia_BA.SG
s19_X10_1.SG	M	Estonia_BA.SG	1125	1218-1017calBCE(2926±28BP,SUERC-80026(GU47834)	Estonia	59.505	25.5281	204714	PASS(literature)	Estonia_BA.SG
s19_X11_1.SG	M	Estonia_BA.SG	956	1046-857calBCE(2805±26BP,SUERC-80010(GU47824)	Estonia	59.3992	27.0142	206954	PASS(literature)	Estonia_BA.SG
s19_X12_1.SG	M	Estonia_BA.SG	817	896-787calBCE(2652±26BP,SUERC-80011,GU-47825)	Estonia	59.3992	27.0142	22067	PASS(literature)	Estonia_BA.SG
s19_X14_1.SG	M	Estonia_BA.SG	630	773-478calBCE(2481±30BP,Hela-2061)	Estonia	59.4708	25.0972	273432	PASS(literature)	Estonia_BA.SG
s19_X15_2.SG	M	Estonia_BA.SG	1087	1206-1006calBCE(2899±28BP,SUERC-80016(GU47827)	Estonia	58.2186	26.1125	291522	PASS(literature)	Estonia_BA.SG
s19_X16_1.SG	M	Estonia_BA.SG	986	1107-909calBCE(2834±26BP,SUERC-80019(GU47830)	Estonia	59.4383	24.8853	17706	PASS(literature)	Estonia_BA.SG
s19_X17_2.SG	M	Estonia_BA.SG	869	927-812calBCE(2732±28BP,SUERC-80020(GU47831)	Estonia	59.4383	24.8853	326022	PASS(literature)	Estonia_BA.SG
s19_X20_1.SG	M	Estonia_BA.SG	837	900-799calBCE(2677±26BP,SUERC-80018,GU-47829)	Estonia	59.4308	24.9089	81187	PASS(literature)	Estonia_BA.SG
Kunila2	M	Estonia_CordedWare	2466	2575-2307calBCE(3960±40BP,Poz-10825)	Estonia	58.326	26.152	391940	PASS(literature)	Estonia_CordedWare
MA968.MA976.SG	M	Estonia_CordedWare.SG	2702	2872-2501calBCE(4110±40BP,Poz-10824)	Estonia	59.1	25.37	540176	PASS(literature.merge)	Estonia_CordedWare.SG
MA971.SG	M	Estonia_CordedWare.SG	2450	2850-2050BCE	Estonia	58.33	26.15	470945	PASS(literature)	Estonia_CordedWare.SG
MA973.SG	M	Estonia_CordedWare.SG	2466	2575-2307calBCE(3960±40BP,Poz-10825)	Estonia	58.33	26.15	882294	PASS(literature)	Estonia_CordedWare.SG
EKA1.SG	F	Estonia_CWC.SG	2245	2447-2136calBCE(3805±35BP,Poz-15499)	Estonia	58.3668	26.7345	915208	PASS(literature)	Estonia_CWC.SG
Kivisaare3	M	Estonia_EMN_Narva	4644	4776-4542calBCE(5796±37BP,UBA-25993)	Estonia	58.272	26.052	179342	PASS(literature)	Estonia_EMN_Narva
Veibri4	F	Estonia_EMN_Narva	4810	4895-4726calBCE(5940±22BP,KIA-48843)	Estonia	58.2017	26.465	544896	PASS(literature)	Estonia_EMN_Narva
Tamula1	F	Estonia_MN_CCC_1	3457	3621-3366calBCE(4680±40BP,Poz-15645)	Estonia	57.505	26.584	160654	PASS(literature)	Estonia_MN_CCC		EHG_pooled
Tamula3	M	Estonia_MN_CCC_2	3716	3796-3641calBCE(4940±40BP,Poz-10826)	Estonia	57.505	26.584	155136	PASS(literature)	Estonia_MN_CCC		EHG_pooled
MA974.SG	F	Estonia_N_CombCeramic.SG	3636	3785-3519calBCE(4860±60BP,CAMS-6266)	Estonia	59.45	28.08	53712	PASS(literature)	Estonia_N_CombCeramic.SG
MA975.SG	M	Estonia_N_CombCeramic.SG	3538	3646-3376calBCE(4770±60BP,CAMS-6265)	Estonia	59.45	28.08	109421	PASS(literature)	Estonia_N_CombCeramic.SG
mota.SG	M	Ethiopia_4500BP_published.SG	2520	2576-2465calBCE(3997±29BP,OxA-29631)	Ethiopia	6.79749	38.2079	1181617	PASS	Ethiopia_4500BP_published.SG
TU915(SX29)	M	France_Alsace_Lingolsheim_MN	4650	4800-4500BCE	France	48.5545	7.68175	344821	PASS	France_Alsace_Lingolsheim_MN		Neolithic_Europe_pooled
TU916(SX30)	F	France_Alsace_Lingolsheim_MN	4712	4789-4616calBCE(5842±22BP,BE-8575.1.1)	France	48.5545	7.68175	438991	PASS	France_Alsace_Lingolsheim_MN		Neolithic_Europe_pooled
I1381	M	France_BellBeaker	2300	2500-2100BCE	France	49.153	6.102	690979	PASS(Xcontam=[0.007,0.018])	France_BellBeaker
I1382	M	France_BellBeaker	2245	2447-2136calBCE(3805±35BP,GrA-4468)	France	49.153	6.102	607837	PASS	France_BellBeaker
I1390	M	France_BellBeaker	2381	2552-2209calBCE[unionoftwodates:2552-2238calBCE(3910±35BP,Poz-41227);2465-2209calBCE(3875±35BP,Poz-41226)]	France	47.65	7.45	449568	PASS	France_BellBeaker
I3874	F	France_BellBeaker	2115	2201-2035calBCE(3725±25BP,PSUAMS-1835)	France	44.476	6.369	652965	PASS	France_BellBeaker
I3875	M	France_BellBeaker	2035	2136-1946calBCE(3655±25BP,PSUAMS-1834)	France	44.476	6.369	792712	PASS	France_BellBeaker
I1391_published	F	France_BellBeaker_published	2229	2400-2058calBCE(3795±35BP,Poz-68164)	France	47.96	7.3	87166	PASS	France_BellBeaker_published
I2575_published	M	France_BellBeaker_published	2373	2471-2209calBCE(3895±40BP,GrA-22988)	France	43.9655	5.8126	27777	PASS(mtcontam=[0.96,0.975])	France_BellBeaker_published
PEN003	M	France_EN	5413	5479-5331calBCE(6450±40BP,GrA-32061)	France	43.81	7.51	679007	PASS(literature)	France_EN	France_EN_PEN_A	Neolithic_Europe_pooled
PEN001_real2	F	France_EN	5409	5477-5331calBCE(6440±40BP,GrA-26894)	France	43.81	7.51	685220	PASS(literature)	France_EN	France_EN_PEN_B	Neolithic_Europe_pooled
LBR001	M	France_EN_MN	4790	4898-4712calBCE(5920±35BP,LTL-18523A)	France	43.7	6.99	686531	PASS(literature)	France_EN_MN	France_ENMN_LBR_A	Neolithic_Europe_pooled
LBR002	M	France_EN_MN	5041	5209-4905calBCE(6104±45BP,LTL-8482A)	France	43.7	6.99	655494	PASS(literature)	France_EN_MN	France_ENMN_LBR_A	Neolithic_Europe_pooled
LBR003	F	France_EN_MN	4730	4842-4606calBCE(5864±45BP,LTL-12315A)	France	43.7	6.99	656928	PASS(literature)	France_EN_MN	France_ENMN_LBR_A	Neolithic_Europe_pooled
LBR004	F	France_EN_MN	4847	4984-4722calBCE(5964±45BP,LTL-12316A)	France	43.7	6.99	637381	PASS(literature)	France_EN_MN	France_ENMN_LBR_A	Neolithic_Europe_pooled
LBR005	M	France_EN_MN_o	5101	5216-4953calBCE(6151±45BP,LTL-13784A)	France	43.7	6.99	777790	PASS(literature)	France_EN_MN_o	France_ENMN_LBR_B
PEN001_real1	F	France_EN_o	5411	5478-5331calBCE(6445±40BP,GrA-26893)	France	43.81	7.51	923410	PASS(literature)	France_EN_o	France_EN_PEN_A
BIS130.SG	M	France_GrandEst_EBA.SG	1900	2000-1800BCE	France	48.0983	7.43701	115237	PASS(literature)	France_GrandEst_EBA.SG
BIS385.SG	F	France_GrandEst_EBA.SG	1900	2000-1800BCE	France	48.0983	7.43701	180605	PASS(literature)	France_GrandEst_EBA.SG
OBE3626-1.SG	M	France_GrandEst_EBA.SG	1824	1930-1701calBCE(3505±35BP,Poz-67563)	France	48.4623	7.48167	225156	PASS(literature)	France_GrandEst_EBA.SG
OBE3722.SG	F	France_GrandEst_EBA.SG	1800	1950-1650BCE	France	48.4623	7.48167	153139	PASS(literature)	France_GrandEst_EBA.SG
PSS4170.SG	M	France_GrandEst_EBA.SG	2080	2197-1975calBCE(3690±30BP,Beta-490471)	France	48.5185	3.59633	336030	PASS(literature)	France_GrandEst_EBA.SG
RIX15.SG	M	France_GrandEst_EBA.SG	1650	1700-1600BCE	France	47.7444	7.39683	143372	PASS(literature)	France_GrandEst_EBA.SG
RIX4.SG	F	France_GrandEst_EBA.SG	1714	1879-1613calBCE(3415±40BP,GrA-33880)	France	47.7444	7.39683	171061	PASS(literature)	France_GrandEst_EBA.SG
Schw432.SG	F	France_GrandEst_EN.SG	5081	5210-4952calBCE(6130±40BP,Poz-64773)	France	48.7556	7.59958	145728	PASS(literature)	France_GrandEst_EN.SG		Neolithic_Europe_pooled
Schw72-15.SG	M	France_GrandEst_EN.SG	5075	5250-4900BCE	France	48.7556	7.59958	214137	PASS(literature)	France_GrandEst_EN.SG		Neolithic_Europe_pooled
NIED.SG	F	France_GrandEst_LBA.SG	-125	950-800BCE	France	47.9848	7.39916	120950	PASS(literature)	France_GrandEst_LBA.SG
BERG02-2.SG	F	France_GrandEst_MN.SG	3917	4041-3802calBCE(5135±35BP,Poz-53879)	France	43.2182	2.4127	296452	PASS(literature)	France_GrandEst_MN.SG		Neolithic_Europe_pooled
BERG157-2.SG	F	France_GrandEst_MN.SG	4100	4300-3900BCE	France	43.2182	2.4127	286814	PASS(literature)	France_GrandEst_MN.SG		Neolithic_Europe_pooled
BERG157-7.SG	M	France_GrandEst_MN.SG	4162	4319-4050calBCE(5335±35BP,Poz-53888)	France	43.2182	2.4127	233629	PASS(literature)	France_GrandEst_MN.SG		Neolithic_Europe_pooled
BUCH2.SG	M	France_GrandEst_MN.SG	4300	4400-4200BCE	France	48.2357	4.11263	332588	PASS(literature)	France_GrandEst_MN.SG		Neolithic_Europe_pooled
PSS4693.SG	F	France_GrandEst_MN.SG	3446	3605-3349calBCE(4650±45BP,GrA-46284)	France	48.5185	3.59633	528368	PASS(literature)	France_GrandEst_MN.SG		Neolithic_Europe_pooled
ROS102.SG	M	France_GrandEst_MN.SG	4650	4800-4500BCE	France	48.4967	7.47052	147235	PASS(literature)	France_GrandEst_MN.SG		Neolithic_Europe_pooled
ROS45.SG	M	France_GrandEst_MN.SG	4694	4789-4607calBCE(5833±29BP,OxA-27814)	France	48.4967	7.47052	235951	PASS(literature)	France_GrandEst_MN.SG		Neolithic_Europe_pooled
ROS78.SG	M	France_GrandEst_MN.SG	4650	4800-4500BCE	France	48.4967	7.47052	352615	PASS(literature)	France_GrandEst_MN.SG		Neolithic_Europe_pooled
ROS82.SG	F	France_GrandEst_MN.SG	4669	4780-4552calBCE(5816±28BP,SUERC-46435)	France	48.4967	7.47052	100210	PASS(literature)	France_GrandEst_MN.SG		Neolithic_Europe_pooled
WET370.SG	M	France_GrandEst_MN.SG	3544	3641-3378calBCE(4764±45BP,LTL-18703A)	France	48.0578	7.3	175097	PASS(literature)	France_GrandEst_MN.SG		Neolithic_Europe_pooled
MDV248.SG	M	France_HautsDeFrance_EN.SG	5013	5206-4853calBCE(6090±30BP,SacA-5462)	France	49.419	4.00774	116327	PASS(literature)	France_HautsDeFrance_EN.SG
CBV95.SG	M	France_HautsDeFrance_LN.SG	2497	2575-2350calBCE(3970±30BP,GrA-32767)	France	49.3623	3.46272	153930	PASS(literature)	France_HautsDeFrance_LN.SG
BLP10.SG	M	France_HautsDeFrance_MN.SG	4115	4239-3985calBCE(5275±40BP,GrA-3117)	France	49.3925	3.73641	194801	PASS(literature)	France_HautsDeFrance_MN.SG		Neolithic_Europe_pooled
Es97-1.SG	M	France_HautsDeFrance_MN.SG	4550	4900-4200BCE	France	50.9178	1.7131	269224	PASS(literature)	France_HautsDeFrance_MN.SG		Neolithic_Europe_pooled
FLR001	M	France_MN	4464	4542-4367calBCE(5640±30BP,Beta-421634)	France	49.19	-0.38	513672	PASS(literature)	France_MN	France_MN_FLR
FLR002	M	France_MN	4022	4214-3958calBCE(5210±30BP,Beta-416654)	France	49.19	-0.38	521115	PASS(literature)	France_MN	France_MN_FLR
FLR003	M	France_MN	4426	4531-4356calBCE(5610±30BP,Beta-416656)	France	49.19	-0.38	693771	PASS(literature)	France_MN	France_MN_FLR
FLR004	M	France_MN	4562	4678-4458calBCE(5720±30BP,Beta-413158)	France	49.19	-0.38	731973	PASS(literature)	France_MN	France_MN_FLR
FLR005	M	France_MN	4351	4444-4262calBCE(5500±30BP,Beta-416661)	France	49.19	-0.38	613062	PASS(literature)	France_MN	France_MN_FLR
FLR007	M	France_MN	4376	4446-4331calBCE(5520±30BP,Beta-416662)	France	49.19	-0.38	739357	PASS(literature)	France_MN	France_MN_FLR
FLR010	M	France_MN	4395	4447-4346calBCE(5550±30BP,Beta-416659)	France	49.19	-0.38	313423	PASS(literature)	France_MN	France_MN_FLR
FLR013	F	France_MN	4406	4486-4350calBCE(5580±30BP,Beta-413162)	France	49.19	-0.38	357272	PASS(literature)	France_MN	France_MN_FLR
FLR014	M	France_MN	4476	4546-4368calBCE(5650±30BP,Beta-413164)	France	49.19	-0.38	373716	PASS(literature)	France_MN	France_MN_FLR
GRG003	M	France_MN	4500	5000-4000BCE	France	47.97	3.56	735617	PASS(literature)	France_MN	France_MN_GRG
GRG008	M	France_MN	4500	5000-4000BCE	France	47.97	3.56	661417	PASS(literature)	France_MN	France_MN_GRG
GRG015	F	France_MN	4500	5000-4000BCE	France	47.97	3.56	766960	PASS(literature)	France_MN	France_MN_GRG
GRG016	M	France_MN	4457	4542-4363calBCE(5635±35BP,Lyon-4680,SacA-9832)	France	47.97	3.56	649358	PASS(literature)	France_MN	France_MN_GRG
GRG018	F	France_MN	4643	4784-4537calBCE(5795±45BP,Lyon-5875,SacA-14823)	France	47.97	3.56	365011	PASS(literature)	France_MN	France_MN_GRG
GRG019	F	France_MN	4500	5000-4000BCE	France	47.97	3.56	748055	PASS(literature)	France_MN	France_MN_GRG
GRG021	M	France_MN	4500	5000-4000BCE	France	47.97	3.56	703952	PASS(literature)	France_MN	France_MN_GRG
GRG022	M	France_MN	4500	5000-4000BCE	France	47.97	3.56	679243	PASS(literature)	France_MN	France_MN_GRG
GRG023	M	France_MN	4500	5000-4000BCE	France	47.97	3.56	379035	PASS(literature)	France_MN	France_MN_GRG
GRG025	F	France_MN	4500	5000-4000BCE	France	47.97	3.56	677429	PASS(literature)	France_MN	France_MN_GRG
GRG027	M	France_MN	4740	4840-4615calBCE(5870±40BP,Lyon-4444,SacA-8627)	France	47.97	3.56	752706	PASS(literature)	France_MN	France_MN_GRG
GRG028	F	France_MN	4721	4836-4606calBCE(5855±40BP,Lyon-4446,SacA-8629)	France	47.97	3.56	603262	PASS(literature)	France_MN	France_MN_GRG
GRG032	F	France_MN	4138	4310-3994calBCE(5303±40BP,Ly-12933)	France	47.97	3.56	722083	PASS(literature)	France_MN	France_MN_GRG
GRG035	M	France_MN	4500	5000-4000BCE	France	47.97	3.56	579510	PASS(literature)	France_MN	France_MN_GRG
GRG041	M	France_MN	4500	5000-4000BCE	France	47.97	3.56	559579	PASS(literature)	France_MN	France_MN_GRG
GRG043	M	France_MN	4500	5000-4000BCE	France	47.97	3.56	675473	PASS(literature)	France_MN	France_MN_GRG
GRG047	M	France_MN	4500	5000-4000BCE	France	47.97	3.56	461739	PASS(literature)	France_MN	France_MN_GRG
GRG049	F	France_MN	4621	4781-4460calBCE(5773±58BP,Ly-12934)	France	47.97	3.56	82526	PASS(literature)	France_MN	France_MN_GRG
GRG050	F	France_MN	4500	5000-4000BCE	France	47.97	3.56	402990	PASS(literature)	France_MN	France_MN_GRG
GRG052	M	France_MN	4500	5000-4000BCE	France	47.97	3.56	594341	PASS(literature)	France_MN	France_MN_GRG
GRG056	F	France_MN	4500	5000-4000BCE	France	47.97	3.56	449092	PASS(literature)	France_MN	France_MN_GRG
GRG057	M	France_MN	4665	4786-4547calBCE(5815±45BP,Lyon-4449,SacA-8632)	France	47.97	3.56	525978	PASS(literature)	France_MN	France_MN_GRG
OBN002	F	France_MN	4750	5000-4500BCE	France	48.46	7.48	408444	PASS(literature)	France_MN	France_MN_OBN_A
OBN005	M	France_MN	4938	5023-4845calBCE(6044±25BP,LTL-18526A)	France	48.46	7.48	435817	PASS(literature)	France_MN	France_MN_OBN_A
OBN008	F	France_MN	4593	4686-4499calBCE(5743±30BP,SUERC-52378)	France	48.46	7.48	822877	PASS(literature)	France_MN	France_MN_OBN_A
OBN010	F	France_MN	4750	5000-4500BCE	France	48.46	7.48	608521	PASS(literature)	France_MN	France_MN_OBN_A
OBN004	M	France_MN	4578	4678-4496calBCE(5732±25BP,LTL-18525A)	France	48.46	7.48	503960	PASS(literature)	France_MN	France_MN_OBN_C
OBN006	M	France_MN	5076	5209-4954calBCE(6124±25BP,LTL-18527A)	France	48.46	7.48	526876	PASS(literature)	France_MN	France_MN_OBN_C
OBN007	M	France_MN	4427	4536-4349calBCE(5601±45BP,LTL-18528A)	France	48.46	7.48	546337	PASS(literature)	France_MN	France_MN_OBN_C
OBN009	F	France_MN	4448	4537-4364calBCE(5628±25BP,LTL-18529A)	France	48.46	7.48	660137	PASS(literature)	France_MN	France_MN_OBN_C
OBN011	M	France_MN	4599	4686-4504calBCE(5749±25BP,LTL-18531A)	France	48.46	7.48	555538	PASS(literature)	France_MN	France_MN_OBN_C
PRI001	M	France_MN	4268	4342-4077calBCE(5406±32BP,OxA-15063)	France	46.15	-0.48	584367	PASS(literature)	France_MN	France_MN_PRI
PRI005	U	France_MN	4200	4300-4100BCE	France	46.15	-0.48	55018	PASS(literature)	France_MN	France_MN_PRI
PRI006	F	France_MN	4200	4300-4100BCE	France	46.15	-0.48	369218	PASS(literature)	France_MN	France_MN_PRI
OBN001	F	France_MN_o	4659	4777-4548calBCE(5809±33BP,OxA-30277)	France	48.46	7.48	242080	PASS(literature)	France_MN_o	France_MN_OBN_B
OBN003	F	France_MN_o	4594	4691-4496calBCE(5744±33BP,OxA-30278)	France	48.46	7.48	586304	PASS(literature)	France_MN_o	France_MN_OBN_B
PER3023.SG	F	France_NouvelleAquitaine_Mesolithic.SG	7100	7200-7000BCE	France	45.77	0.33	149221	PASS(literature)	France_NouvelleAquitaine_Mesolithic.SG
PER503.SG	F	France_NouvelleAquitaine_Mesolithic.SG	7100	7200-7000BCE	France	45.77	0.33	277685	PASS(literature)	France_NouvelleAquitaine_Mesolithic.SG
EUG11.SG	M	France_Occitanie_EBA.SG	1932	2028-1782calBCE(3580±30BP,Beta-471249)	France	43.162	2.3116	152111	PASS(literature)	France_Occitanie_EBA.SG
PIR3037AB.SG	M	France_Occitanie_EBA.SG	2045	2196-1903calBCE(3663±43BP,Erl-12277)	France	43.2516	3.2202	65064	PASS(literature)	France_Occitanie_EBA.SG
PIR3116B.SG	M	France_Occitanie_EBA.SG	2220	2340-2064calBCE(3790±30BP,Ly-14877)	France	43.2516	3.2202	109358	PASS(literature)	France_Occitanie_EBA.SG
QUIN234.SG	F	France_Occitanie_EMBA.SG	1650	2100-1200BCE	France	43.2957	1.96175	138896	PASS(literature)	France_Occitanie_EMBA.SG
QUIN58.SG	M	France_Occitanie_EMBA.SG	1650	2100-1200BCE	France	43.2957	1.96175	111163	PASS(literature)	France_Occitanie_EMBA.SG
PEI10.SG	F	France_Occitanie_LN.SG	2786	2895-2671calBCE(4200±30BP,Ly-14876)	France	43.1355	2.2519	58943	PASS(literature)	France_Occitanie_LN.SG		Neolithic_Europe_pooled
PEI2.SG	F	France_Occitanie_LN.SG	2800	2950-2650BCE	France	43.1355	2.2519	215952	PASS(literature)	France_Occitanie_LN.SG		Neolithic_Europe_pooled
Pir6.SG	F	France_Occitanie_MBA.SG	1634	1744-1519calBCE(3356±43BP,Erl-12275)	France	43.2516	3.2202	88630	PASS(literature)	France_Occitanie_MBA.SG
CRE20D.SG	F	France_Occitanie_MN.SG	4300	4400-4200BCE	France	43.2051	3.1308	259197	PASS(literature)	France_Occitanie_MN.SG		Neolithic_Europe_pooled
Pir4.SG	F	France_Occitanie_MN.SG	4343	4448-4251calBCE(5494±49BP,Erl-13040)	France	43.2516	3.2202	86257	PASS(literature)	France_Occitanie_MN.SG		Neolithic_Europe_pooled
Rochedane	M	France_Rochedane	11077	11207-10955calBCE(11120±50BP,GrA-41739)	France	47.21	6.45	145462	PASS(manual.QC)	France_Rochedane
RISE471.SG	M	Germany_BA.SG	1593	1687-1517calBCE(3330±29BP,OxA-32104)	Germany	48.17	10.814	114375	PASS(literature)	Germany_BA.SG
I0108	F	Germany_BellBeaker	2449	2575-2297calBCE(3953±47BP,Erl-8710)	Germany	51.45	11.54	735474	PASS	Germany_BellBeaker
I0111	F	Germany_BellBeaker	2353	2474-2201calBCE(3881±50BP,Erl-8712)	Germany	51.45	11.54	540050	PASS	Germany_BellBeaker
I0112	F	Germany_BellBeaker	2274	2455-2141calBCE(3820±42BP,Erl-7038)	Germany	51.791	11.141	949947	PASS	Germany_BellBeaker
I0806	M	Germany_BellBeaker	2267	2433-2147calBCE(3824±25BP,MAMS-22820)	Germany	51.79	11.14	138919	PASS	Germany_BellBeaker
I1546	F	Germany_BellBeaker	2275	2500-2050BCE	Germany	51.82	10.91	149628	PASS	Germany_BellBeaker
I1549	F	Germany_BellBeaker	2275	2500-2050BCE	Germany	51.82	10.91	780302	PASS(mtcontam=[0.947,0.96])	Germany_BellBeaker
I3588	M	Germany_BellBeaker	2225	2300-2150BCE	Germany	48.8833	12.5332	419937	PASS	Germany_BellBeaker
I3589	M	Germany_BellBeaker	2225	2300-2150BCE	Germany	48.8833	12.5332	535720	PASS	Germany_BellBeaker
I3590	F	Germany_BellBeaker	2236	2341-2141calBCE(3802±26BP,BRAMS-1217)	Germany	48.8833	12.5332	422400	PASS	Germany_BellBeaker
I3594	F	Germany_BellBeaker	2225	2300-2150BCE	Germany	48.8833	12.5332	613980	PASS	Germany_BellBeaker
I3600	F	Germany_BellBeaker	2225	2300-2150BCE	Germany	48.8833	12.5332	288583	PASS	Germany_BellBeaker
I3601	F	Germany_BellBeaker	2225	2300-2150BCE	Germany	48.8833	12.5332	656910	PASS	Germany_BellBeaker
I4124	F	Germany_BellBeaker	2328	2459-2204calBCE(3855±35BP,Poz-84458)	Germany	48.33	10.895	204440	PASS	Germany_BellBeaker
I4134	M	Germany_BellBeaker	2300	2800-1800BCE	Germany	48.691	13.016	65655	PASS	Germany_BellBeaker
I4143	F	Germany_BellBeaker	2317	2456-2203calBCE(3848±34BP,Hd-19835)	Germany	48.663	12.707	115074	PASS(mtcontam=[0.957,0.976])	Germany_BellBeaker
I4144	M	Germany_BellBeaker	2461	2573-2310calBCE(3955±35BP,Poz-84553)	Germany	48.691	13.016	97061	PASS	Germany_BellBeaker
I5014	F	Germany_BellBeaker	2250	2500-2000BCE	Germany	48.711	11.453	106588	PASS	Germany_BellBeaker
I5023	F	Germany_BellBeaker	2250	2500-2000BCE	Germany	48.691	13.016	527557	PASS	Germany_BellBeaker
I5519	M	Germany_BellBeaker	2250	2500-2000BCE	Germany	48.33	10.895	726140	PASS	Germany_BellBeaker
I5520	F	Germany_BellBeaker	2300	2800-1800BCE	Germany	48.33	10.895	270271	PASS(damage.ds.half=0.039)	Germany_BellBeaker
I5521	F	Germany_BellBeaker	2300	2800-1800BCE	Germany	48.33	10.895	673566	PASS	Germany_BellBeaker
I5523	F	Germany_BellBeaker	2300	2800-1800BCE	Germany	48.663	12.707	531015	PASS	Germany_BellBeaker
I5524	F	Germany_BellBeaker	2300	2800-1800BCE	Germany	48.663	12.707	574583	PASS(damage.ds.half=0.038)	Germany_BellBeaker
I5525	F	Germany_BellBeaker	2300	2800-1800BCE	Germany	48.663	12.707	777278	PASS(damage.ds.half=0.032)	Germany_BellBeaker
I5527	F	Germany_BellBeaker	2300	2800-1800BCE	Germany	48.711	11.453	23318	PASS	Germany_BellBeaker
I5529	M	Germany_BellBeaker	2300	2800-1800BCE	Germany	48.691	13.016	451116	PASS	Germany_BellBeaker
I5531	F	Germany_BellBeaker	2300	2800-1800BCE	Germany	48.7059	11.3254	610570	PASS	Germany_BellBeaker
I5658	F	Germany_BellBeaker	2250	2500-2000BCE	Germany	48.841	12.75	284502	PASS	Germany_BellBeaker
I5659	M	Germany_BellBeaker	2250	2500-2000BCE	Germany	48.841	12.75	114336	PASS	Germany_BellBeaker
I5833	M	Germany_BellBeaker	2250	2500-2000BCE	Germany	48.841	12.75	680513	PASS	Germany_BellBeaker
I5834	F	Germany_BellBeaker	2250	2500-2000BCE	Germany	48.841	12.75	605212	PASS	Germany_BellBeaker
I5836	F	Germany_BellBeaker	2300	2800-1800BCE	Germany	49.6529	8.32768	415551	PASS	Germany_BellBeaker
I6482	F	Germany_BellBeaker	2300	2800-1800BCE	Germany	48.7059	11.3254	16896	PASS(mtcontam=[0.946,0.976])	Germany_BellBeaker
I6590	F	Germany_BellBeaker	2250	2500-2000BCE	Germany	48.841	12.75	823913	PASS	Germany_BellBeaker
I6591	F	Germany_BellBeaker	2250	2500-2000BCE	Germany	48.841	12.75	815600	PASS	Germany_BellBeaker
I6624	F	Germany_BellBeaker	2250	2500-2000BCE	Germany	48.841	12.75	624057	PASS	Germany_BellBeaker
I0060_published	F	Germany_BellBeaker_published	2264	2404-2146calBCE(3822±25BP,MAMS-22819)	Germany	51.45	11.54	114800	PASS	Germany_BellBeaker_published
I3602_published	F	Germany_BellBeaker_published	2225	2300-2150BCE	Germany	48.8833	12.5332	85941	PASS(popgen.possibly.odd.position)	Germany_BellBeaker_published
I3604_published	M	Germany_BellBeaker_published	2250	2500-2000BCE	Germany	48.6639	13.0736	30589	PASS	Germany_BellBeaker_published
I4249_published	F	Germany_BellBeaker_published	2236	2341-2141calBCE(3802±26BP,BRAMS1217)	Germany	48.841	12.75	32814	PASS	Germany_BellBeaker_published
I4250_published	F	Germany_BellBeaker_published	2270	2441-2147calBCE(3825±26BP,BRAMS1219)	Germany	48.841	12.75	29790	PASS(literature)	Germany_BellBeaker_published
I5655_published	F	Germany_BellBeaker_published	2250	2500-2000BCE	Germany	48.841	12.75	26021	PASS(literature)	Germany_BellBeaker_published
I5661_published	M	Germany_BellBeaker_published	2250	2500-2000BCE	Germany	48.841	12.75	90529	PASS(literature)	Germany_BellBeaker_published
I5663_published	M	Germany_BellBeaker_published	2250	2500-2000BCE	Germany	48.841	12.75	23224	PASS(literature)	Germany_BellBeaker_published
I0059	F	Germany_BenzigerodeHeimburg_LN	2229	2343-2137calBCE(3796±30BP,MAMS-21486)	Germany	51.82	10.91	725307	PASS	Germany_BenzigerodeHeimburg_LN
I0171	F	Germany_BenzigerodeHeimburg_LN	2168	2288-2039calBCE(3758±33BP,KIA-27952)	Germany	51.82	10.91	140559	PASS	Germany_BenzigerodeHeimburg_LN
I1593	M	Germany_Blatterhohle_MN	3577	3644-3528calBCE(4810±23BP)[R_combine:(4615±30,KIA-28845,Bla16);(5055±35,KIA-37508,Bla27)]	Germany	51.3583	7.55111	566895	PASS(mtmatchmax=0.954-0.991)	Germany_Blatterhohle_MN
I1594	M	Germany_Blatterhohle_MN	3190	3338-3024calBCE(4465±30BP,KIA-28846)	Germany	51.3583	7.55111	107579	PASS	Germany_Blatterhohle_MN
I0049	F	Germany_CordedWare	2345	2463-2206calBCE(3867±35BP,MAMS-21489)	Germany	51.42	11.68	514322	PASS	Germany_CordedWare
I0103	F	Germany_CordedWare	2522	2617-2461calBCE(4000±31BP,MAMS-21488)	Germany	51.42	11.68	1049840	PASS(mtmatchmax=0.974-0.981)	Germany_CordedWare
I0104	M	Germany_CordedWare	2408	2563-2295calBCE(3927±37BP,MAMS-21487)	Germany	51.42	11.68	962767	PASS(Xcontam=0.002)	Germany_CordedWare
I0106	F	Germany_CordedWare	2347	2461-2208calBCE(3867±32BP,MAMS-21490)	Germany	51.42	11.68	222103	PASS	Germany_CordedWare
I1532	M	Germany_CordedWare	2275	2500-2050BCE	Germany	51.42	11.68	464060	PASS	Germany_CordedWare
I1534	M	Germany_CordedWare	2275	2500-2050BCE	Germany	51.42	11.68	164095	PASS	Germany_CordedWare
I1536	M	Germany_CordedWare	2275	2500-2050BCE	Germany	51.42	11.68	114655	PASS	Germany_CordedWare
I1538	M	Germany_CordedWare	2275	2500-2050BCE	Germany	51.42	11.68	135269	PASS	Germany_CordedWare
I1539	F	Germany_CordedWare	2470	2630-2287calBCE(3967±57BP,Erl-7779)	Germany	51.42	11.68	138220	PASS	Germany_CordedWare
I1542	M	Germany_CordedWare	2275	2500-2050BCE	Germany	51.42	11.68	76340	PASS	Germany_CordedWare
I1544	M	Germany_CordedWare	2275	2500-2050BCE	Germany	51.42	11.68	114655	PASS	Germany_CordedWare
ALT_3_d	F	Germany_CordedWare_Tauber	2500	2600-2400BCE	Germany	49.4683	9.74407	18450	PASS(literature)	Germany_CordedWare_Tauber
ALT_4_d	M	Germany_CordedWare_Tauber	2503	2573-2356calBCE(3970±24BP,MAMS-18885)	Germany	49.4683	9.74407	83065	PASS(literature)	Germany_CordedWare_Tauber
RISE434.SG	M	Germany_CordedWare.SG	2753	2880-2629calBCE(4161±34BP,UBA-27946)	Germany	48.932	12.259	109337	PASS(literature)	Germany_CordedWare.SG
RISE435.SG	F	Germany_CordedWare.SG	2677	2865-2497calBCE(4094±33BP,UBA-27947)	Germany	48.932	12.259	49066	PASS(literature)	Germany_CordedWare.SG
RISE436.SG	M	Germany_CordedWare.SG	2721	2869-2579calBCE(4124±31BP,UBA-27948)	Germany	48.932	12.259	62088	PASS(literature)	Germany_CordedWare.SG
RISE446.SG	M	Germany_CordedWare.SG	2536	2662-2460calBCE(4015±38BP,UBA-27950)	Germany	50.009	10.18	184657	PASS(literature)	Germany_CordedWare.SG
I0115	F	Germany_EBA_Unetice	1865	1959-1751calBCE(3540±31BP,MAMS-21494)	Germany	51.42	11.68	352282	PASS(mtcontam=[0.965,0.978])	Germany_EBA_Unetice
I0116	M	Germany_EBA_Unetice	2028	2137-1936calBCE(3650±32BP,MAMS-21495)	Germany	51.42	11.68	629665	PASS(mtcontam=[0.959,0.971])	Germany_EBA_Unetice
I0117	F	Germany_EBA_Unetice	2142	2276-2037calBCE(3743±25BP,MAMS-21496)	Germany	51.42	11.68	843093	PASS(mtmatchmax=0.976-0.983)	Germany_EBA_Unetice
I0164	F	Germany_EBA_Unetice	1956	2027-1890calBCE(3599±25BP,MAMS-21497)	Germany	51.793	11.143	834837	PASS(mtcontam=[0.956,0.978])	Germany_EBA_Unetice
I0803	F	Germany_EBA_Unetice	2027	2135-1941calBCE(3650±26BP,MAMS-22822)	Germany	51.1677	11.8475	213212	PASS	Germany_EBA_Unetice
I0804	M	Germany_EBA_Unetice	2060	2139-1959calBCE(3671±26BP,MAMS-22821)	Germany	51.1677	11.8475	61524	PASS	Germany_EBA_Unetice
I0047_published	F	Germany_EBA_Unetice_published	1973	2116-1888calBCE(3612±30BP,MAMS-21481)	Germany	51.8958	11.0467	806227	PASS(literature)	Germany_EBA_Unetice_published
HBS002	M	Germany_EN_LBK	5025	5250-4800BCE	Germany	51.9	11.05	63346	PASS(literature)	Germany_EN_LBK		Neolithic_Europe_pooled
HBS004	M	Germany_EN_LBK	5025	5250-4800BCE	Germany	51.9	11.05	107847	PASS(literature)	Germany_EN_LBK		Neolithic_Europe_pooled
HBS005	M	Germany_EN_LBK	5025	5250-4800BCE	Germany	51.9	11.05	73231	PASS(literature)	Germany_EN_LBK		Neolithic_Europe_pooled
HBS006	U	Germany_EN_LBK	5025	5250-4800BCE	Germany	51.9	11.05	258224	PASS(literature)	Germany_EN_LBK		Neolithic_Europe_pooled
HBS007	M	Germany_EN_LBK	5025	5250-4800BCE	Germany	51.9	11.05	133986	PASS(literature)	Germany_EN_LBK		Neolithic_Europe_pooled
HBS008	M	Germany_EN_LBK	5025	5250-4800BCE	Germany	51.9	11.05	116519	PASS(literature)	Germany_EN_LBK		Neolithic_Europe_pooled
HBS009	M	Germany_EN_LBK	5025	5250-4800BCE	Germany	51.9	11.05	262385	PASS(literature)	Germany_EN_LBK		Neolithic_Europe_pooled
I0018	F	Germany_EN_LBK	5218	5307-5071calBCE(6246±30BP,MAMS-24635)	Germany	48.78	9.18	910144	PASS	Germany_EN_LBK		Neolithic_Europe_pooled
I0022	F	Germany_EN_LBK	5175	5500-4850BCE	Germany	48.78	9.18	368546	PASS	Germany_EN_LBK		Neolithic_Europe_pooled
I0025	F	Germany_EN_LBK	5175	5500-4850BCE	Germany	48.78	9.18	836923	PASS	Germany_EN_LBK		Neolithic_Europe_pooled
I0026	F	Germany_EN_LBK	5175	5500-4850BCE	Germany	48.78	9.18	893563	PASS	Germany_EN_LBK		Neolithic_Europe_pooled
I0054	F	Germany_EN_LBK	5124	5216-5009calBCE(6180±34BP,MAMS-21485)	Germany	51.66	11.53	978534	PASS(mtmatchmax=0.968-0.989)	Germany_EN_LBK		Neolithic_Europe_pooled
I0100	F	Germany_EN_LBK	4994	5205-4850calBCE(6080±32BP,KIA-40341)	Germany	51.8958	11.0467	982315	PASS	Germany_EN_LBK		Neolithic_Europe_pooled
I0795	M	Germany_EN_LBK	5121	5215-5030calBCE(6174±29BP,MAMS-22823)	Germany	51.2831	11.65	104752	PASS	Germany_EN_LBK		Neolithic_Europe_pooled
I0797	M	Germany_EN_LBK	5175	5500-4850BCE	Germany	51.2831	11.65	94125	PASS	Germany_EN_LBK		Neolithic_Europe_pooled
I2014	M	Germany_EN_LBK	4996	5204-4852calBCE(6081±30BP,KIA-40344)	Germany	51.8958	11.0467	19344	PASS	Germany_EN_LBK		Neolithic_Europe_pooled
I2022	F	Germany_EN_LBK	5175	5500-4850BCE	Germany	51.8958	11.0467	20626	PASS	Germany_EN_LBK		Neolithic_Europe_pooled
SCH001	F	Germany_EN_LBK	5100	5200-5000BCE	Germany	49.39	8.57	61754	PASS(literature)	Germany_EN_LBK		Neolithic_Europe_pooled
SCH004	M	Germany_EN_LBK	5100	5200-5000BCE	Germany	49.39	8.57	17613	PASS(literature)	Germany_EN_LBK		Neolithic_Europe_pooled
SCH007	F	Germany_EN_LBK	5100	5200-5000BCE	Germany	49.39	8.57	117801	PASS(literature)	Germany_EN_LBK		Neolithic_Europe_pooled
SCH009	F	Germany_EN_LBK	5100	5200-5000BCE	Germany	49.39	8.57	232901	PASS(literature)	Germany_EN_LBK		Neolithic_Europe_pooled
SCH010	F	Germany_EN_LBK	5100	5200-5000BCE	Germany	49.39	8.57	283866	PASS(literature)	Germany_EN_LBK		Neolithic_Europe_pooled
SCH011	M	Germany_EN_LBK	5100	5200-5000BCE	Germany	49.39	8.57	29594	PASS(literature)	Germany_EN_LBK		Neolithic_Europe_pooled
SCH014	F	Germany_EN_LBK	5100	5200-5000BCE	Germany	49.39	8.57	327196	PASS(literature)	Germany_EN_LBK		Neolithic_Europe_pooled
SCH015	F	Germany_EN_LBK	5100	5200-5000BCE	Germany	49.39	8.57	29746	PASS(literature)	Germany_EN_LBK		Neolithic_Europe_pooled
SCH016	M	Germany_EN_LBK	5141	5298-5041calBCE(6202±36BP,OxA-23206)	Germany	49.39	8.57	281029	PASS(literature)	Germany_EN_LBK		Neolithic_Europe_pooled
SCH018	U	Germany_EN_LBK	5095	5212-4959calBCE(6141±37BP,OxA-23211)	Germany	49.39	8.57	34457	PASS(literature)	Germany_EN_LBK		Neolithic_Europe_pooled
SMH004	F	Germany_EN_LBK	5166	5299-5061calBCE(6222±25BP,MAMS-36741)	Germany	48.78	9.18	287138	PASS(literature)	Germany_EN_LBK		Neolithic_Europe_pooled
XN164	M	Germany_EN_LBK	5160	5299-5059calBCE(6219±25BP,MAMS-36728)	Germany	48.78	9.18	364692	PASS(literature)	Germany_EN_LBK		Neolithic_Europe_pooled
XN165	M	Germany_EN_LBK	5149	5296-5056calBCE(6213±24BP,MAMS-36725)	Germany	48.78	9.18	445351	PASS(literature)	Germany_EN_LBK		Neolithic_Europe_pooled
XN166	F	Germany_EN_LBK	5150	5300-5000BCE	Germany	48.78	9.18	323920	PASS(literature)	Germany_EN_LBK		Neolithic_Europe_pooled
XN167	M	Germany_EN_LBK	5226	5310-5072calBCE(6250±30BP,MAMS-36743)	Germany	48.78	9.18	410530	PASS(literature)	Germany_EN_LBK		Neolithic_Europe_pooled
XN168	M	Germany_EN_LBK	5143	5293-5055calBCE(6209±24BP,MAMS-36734)	Germany	48.78	9.18	268060	PASS(literature)	Germany_EN_LBK		Neolithic_Europe_pooled
XN169	F	Germany_EN_LBK	5131	5282-5046calBCE(6195±25BP,MAMS-36726)	Germany	48.78	9.18	368674	PASS(literature)	Germany_EN_LBK		Neolithic_Europe_pooled
XN170	M	Germany_EN_LBK	5074	5209-4951calBCE(6123±26BP,MAMS-36730)	Germany	48.78	9.18	326280	PASS(literature)	Germany_EN_LBK		Neolithic_Europe_pooled
XN171	M	Germany_EN_LBK	5156	5298-5057calBCE(6217±25BP,MAMS-36729)	Germany	48.78	9.18	456208	PASS(literature)	Germany_EN_LBK		Neolithic_Europe_pooled
XN172	F	Germany_EN_LBK	5151	5297-5056calBCE(6214±25BP,MAMS-36732)	Germany	48.78	9.18	389680	PASS(literature)	Germany_EN_LBK		Neolithic_Europe_pooled
XN173	M	Germany_EN_LBK	5110	5210-5007calBCE(6155±31BP,MAMS-25933)	Germany	48.78	9.18	147749	PASS(literature)	Germany_EN_LBK		Neolithic_Europe_pooled
XN174	M	Germany_EN_LBK	4948	5215-4681calBCE[unionofthreedates:5215-4840calBCE(6100±70BP,Hd-8031);4993-4709calBCE(5950±60BP,Hd-7974);4936-4681calBCE(5910±50BP,Hd-7935)]	Germany	48.78	9.18	237140	PASS(literature)	Germany_EN_LBK		Neolithic_Europe_pooled
XN175	F	Germany_EN_LBK	5142	5292-5055calBCE(6208±24BP,MAMS-36740)	Germany	48.78	9.18	321266	PASS(literature)	Germany_EN_LBK		Neolithic_Europe_pooled
XN178	F	Germany_EN_LBK	5150	5300-5000BCE	Germany	48.78	9.18	41455	PASS(literature)	Germany_EN_LBK		Neolithic_Europe_pooled
XN180	M	Germany_EN_LBK	5118	5214-5011calBCE(6169±33BP,MAMS-36745)	Germany	48.78	9.18	182870	PASS(literature)	Germany_EN_LBK		Neolithic_Europe_pooled
XN182	F	Germany_EN_LBK	5126	5305-4946calBCE[unionoftwodates:5305-5034calBCE(6210±45BP,Hd-7979);5211-4946calBCE(6130±45BP,Hd-7977)]	Germany	48.78	9.18	114826	PASS(literature)	Germany_EN_LBK		Neolithic_Europe_pooled
XN183	F	Germany_EN_LBK	5202	5304-5068calBCE(6236±25BP,MAMS-36736)	Germany	48.78	9.18	109371	PASS(literature)	Germany_EN_LBK		Neolithic_Europe_pooled
XN188	F	Germany_EN_LBK	5180	5302-5063calBCE(6228±25BP,MAMS-36735)	Germany	48.78	9.18	220191	PASS(literature)	Germany_EN_LBK		Neolithic_Europe_pooled
XN191	M	Germany_EN_LBK	5249	5316-5081calBCE(6267±30BP,MAMS-25931)	Germany	48.78	9.18	20283	PASS(literature)	Germany_EN_LBK		Neolithic_Europe_pooled
XN205	F	Germany_EN_LBK	5150	5300-5000BCE	Germany	48.78	9.18	67101	PASS(literature)	Germany_EN_LBK		Neolithic_Europe_pooled
XN206	U	Germany_EN_LBK	5136	5288-5051calBCE(6202±25BP,MAMS-36738)	Germany	48.78	9.18	27573	PASS(literature)	Germany_EN_LBK		Neolithic_Europe_pooled
XN207	F	Germany_EN_LBK	5150	5300-5000BCE	Germany	48.78	9.18	156614	PASS(literature)	Germany_EN_LBK		Neolithic_Europe_pooled
XN211	F	Germany_EN_LBK	5118	5212-5031calBCE(6165±25BP,MAMS-36733)	Germany	48.78	9.18	64250	PASS(literature)	Germany_EN_LBK		Neolithic_Europe_pooled
XN215	M	Germany_EN_LBK	5060	5208-4945calBCE(6115±25BP,MAMS-36727)	Germany	48.78	9.18	31646	PASS(literature)	Germany_EN_LBK		Neolithic_Europe_pooled
XN224	F	Germany_EN_LBK	5141	5293-5053calBCE(6207±25BP,MAMS-36744)	Germany	48.78	9.18	30038	PASS(literature)	Germany_EN_LBK		Neolithic_Europe_pooled
XN225	M	Germany_EN_LBK	5150	5300-5000BCE	Germany	48.78	9.18	120828	PASS(literature)	Germany_EN_LBK		Neolithic_Europe_pooled
I0046_published	F	Germany_EN_LBK_published	5091	5211-4957calBCE(6136±34BP,MAMS-21479)	Germany	51.8958	11.0467	950914	PASS(literature)	Germany_EN_LBK_published
I0048_published	M	Germany_EN_LBK_published	5107	5210-5003calBCE(6153±33BP,MAMS-21482)	Germany	51.8958	11.0467	489640	PASS(literature)	Germany_EN_LBK_published
I0057_published	F	Germany_EN_LBK_published	5120	5215-5011calBCE(6173±34BP,MAMS-21483)	Germany	51.8958	11.0467	392874	PASS(literature)	Germany_EN_LBK_published
I0659_published	M	Germany_EN_LBK_published	5081	5210-4952calBCE(6130±40BP,KIA-40350)	Germany	51.8958	11.0467	648193	PASS(literature)	Germany_EN_LBK_published
I0821_published	M	Germany_EN_LBK_published	4988	5205-4847calBCE(6076±34BP,KIA-40348)	Germany	51.8958	11.0467	629014	PASS(literature)	Germany_EN_LBK_published
I1550_published	F	Germany_EN_LBK_published	5175	5500-4850BCE	Germany	51.8958	11.0467	616873	PASS(literature)	Germany_EN_LBK_published
I2008_published	F	Germany_EN_LBK_published	5091	5211-4957calBCE(6137±35BP,KIA-40342)	Germany	51.8958	11.0467	121860	PASS(literature)	Germany_EN_LBK_published
I2017_published	F	Germany_EN_LBK_published	5175	5500-4850BCE	Germany	51.8958	11.0467	55588	PASS(literature)	Germany_EN_LBK_published
I2021_published	M	Germany_EN_LBK_published	5175	5500-4850BCE	Germany	51.8958	11.0467	35761	PASS(literature)	Germany_EN_LBK_published
I2026_published	M	Germany_EN_LBK_published	5175	5500-4850BCE	Germany	51.8958	11.0467	141883	PASS(literature)	Germany_EN_LBK_published
I2029_published	F	Germany_EN_LBK_published	5150	5299-5049calBCE(6211±32BP,KIA-40349)	Germany	51.8958	11.0467	246281	PASS(literature)	Germany_EN_LBK_published
I2030_published	F	Germany_EN_LBK_published	5175	5500-4850BCE	Germany	51.8958	11.0467	532623	PASS(literature)	Germany_EN_LBK_published
I2032_published	F	Germany_EN_LBK_published	5175	5500-4850BCE	Germany	51.8958	11.0467	285045	PASS(literature)	Germany_EN_LBK_published
I2036_published	F	Germany_EN_LBK_published	5175	5500-4850BCE	Germany	51.8958	11.0467	468627	PASS(literature)	Germany_EN_LBK_published
I2037_published	M	Germany_EN_LBK_published	5100	5210-4998calBCE(6144±32BP,KIA-40343)	Germany	51.8958	11.0467	206907	PASS(literature,X-contam=0.075.and.XcontamZ=1)	Germany_EN_LBK_published
I2038_published	F	Germany_EN_LBK_published	5175	5350-5000BCE	Germany	51.8958	11.0467	299173	PASS(literature)	Germany_EN_LBK_published
Stuttgart_published.DG	F	Germany_EN_LBK_Stuttgart_published.DG	5218	5307-5071calBCE(6246±30BP,MAMS-24635)	Germany	48.78	9.18	1130723	PASS(SGDP,FullyPublic)	Germany_EN_LBK_Stuttgart_published.DG		Neolithic_Europe_pooled
I0099_published	M	Germany_LBA_Halberstadt_published	1074	1202-940calBCE(2889±30BP,MAMS-21484)	Germany	51.8958	11.0467	959437	PASS	Germany_LBA_Halberstadt_published
AMP_1_d	M	Germany_Lech_BellBeaker	2406	2473-2303calBCE(3924±23BP,MAMS-18887)	Germany	48.2589	10.8734	89359	PASS(literature)	Germany_Lech_BellBeaker
HUGO_168_d	F	Germany_Lech_BellBeaker	2217	2291-2140calBCE(3788±23BP,MAMS-18913)	Germany	48.3285	10.8982	329286	PASS(literature)	Germany_Lech_BellBeaker
HUGO_169Sk1_d	M	Germany_Lech_BellBeaker	2435	2566-2310calBCE(3942±25BP,MAMS-18914)	Germany	48.3285	10.8982	63888	PASS(literature)	Germany_Lech_BellBeaker
HUGO_171_d	F	Germany_Lech_BellBeaker	2253	2397-2146calBCE(3815±25BP,MAMS-18917)	Germany	48.3285	10.8982	19691	PASS(literature)	Germany_Lech_BellBeaker
HUGO_180Sk1_d	M	Germany_Lech_BellBeaker	2339	2457-2209calBCE(3860±25BP,MAMS-18918)	Germany	48.3285	10.8982	78861	PASS(literature)	Germany_Lech_BellBeaker
HUGO_190_d	F	Germany_Lech_BellBeaker	2153	2275-2041calBCE(3748±19BP,MAMS-18921)	Germany	48.3285	10.8982	98394	PASS(literature)	Germany_Lech_BellBeaker
UNTA58_68Sk2_d	F	Germany_Lech_BellBeaker	2397	2468-2305calBCE(3910±20BP,MAMS-18935)	Germany	48.3161	10.892	184317	PASS(literature)	Germany_Lech_BellBeaker
WEHR_1192SkA	M	Germany_Lech_BellBeaker	2243	2339-2147calBCE(3810±19BP,MAMS-18922)	Germany	48.2528	10.8088	968607	PASS(Xcontam=[0.007,0.011])	Germany_Lech_BellBeaker
AITI_119	M	Germany_Lech_EBA	1797	1883-1695calBCE(3470±27BP,MAMS-21594)	Germany	48.2228	10.845	548554	PASS(Xcontam=[0.007,0.024])	Germany_Lech_EBA
AITI_2	M	Germany_Lech_EBA	1803	1885-1696calBCE(3477±28BP,MAMS-21562)	Germany	48.2228	10.845	769657	PASS(Xcontam=[0.005,0.011])	Germany_Lech_EBA
AITI_36	M	Germany_Lech_EBA	1886	2011-1773calBCE(3552±27BP,MAMS-21568)	Germany	48.2228	10.845	21373	PASS(literature)	Germany_Lech_EBA
AITI_40	M	Germany_Lech_EBA	1796	1883-1693calBCE(3469±28BP,MAMS-21570)	Germany	48.2228	10.845	205188	PASS(literature)	Germany_Lech_EBA
AITI_43	M	Germany_Lech_EBA	1810	1888-1700calBCE(3486±27BP,MAMS-21571)	Germany	48.2228	10.845	883256	PASS	Germany_Lech_EBA
AITI_50	M	Germany_Lech_EBA	1823	1926-1742calBCE(3505±33BP,MAMS-21572)	Germany	48.2228	10.845	327708	PASS(literature)	Germany_Lech_EBA
AITI_65adult_d	F	Germany_Lech_EBA	1778	1885-1642calBCE(3456±34BP,MAMS-21578)	Germany	48.2228	10.845	71686	PASS(literature)	Germany_Lech_EBA
AITI_66_d	F	Germany_Lech_EBA	1811	1917-1694calBCE(3489±34BP,MAMS-21580)	Germany	48.2228	10.845	177695	PASS(literature)	Germany_Lech_EBA
AITI_72	M	Germany_Lech_EBA	1826	1931-1742calBCE(3508±34BP,MAMS-21583)	Germany	48.2228	10.845	721397	PASS	Germany_Lech_EBA
AITI_77B_d	F	Germany_Lech_EBA	1793	1890-1688calBCE(3469±35BP,MAMS-21585)	Germany	48.2228	10.845	25692	PASS(literature)	Germany_Lech_EBA
AITI_78	M	Germany_Lech_EBA	1798	1891-1690calBCE(3474±34BP,MAMS-21586)	Germany	48.2228	10.845	679165	PASS	Germany_Lech_EBA
AITI_92_d	F	Germany_Lech_EBA	1811	1890-1700calBCE(3489±28BP,MAMS-21590)	Germany	48.2228	10.845	84699	PASS(literature)	Germany_Lech_EBA
AITI_95_d	F	Germany_Lech_EBA	1721	1872-1624calBCE(3422±28BP,MAMS-21591)	Germany	48.2228	10.845	137139	PASS(literature)	Germany_Lech_EBA
AITI_98	M	Germany_Lech_EBA	1655	1742-1544calBCE(3370±27BP,MAMS-21592)	Germany	48.2228	10.845	336848	PASS(literature)	Germany_Lech_EBA
OBKR_117_d	M	Germany_Lech_EBA	1933	2022-1831calBCE(3581±23BP,MAMS-18911)	Germany	48.2666	10.8786	71370	PASS(literature)	Germany_Lech_EBA
OBKR_2_d	F	Germany_Lech_EBA	1956	2026-1890calBCE(3599±22BP,MAMS-18888)	Germany	48.2666	10.8786	31480	PASS(literature)	Germany_Lech_EBA
OBKR_50_d	F	Germany_Lech_EBA	1985	2114-1899calBCE(3623±23BP,MAMS-18895)	Germany	48.2666	10.8786	137205	PASS(literature)	Germany_Lech_EBA
OBKR_66_d	F	Germany_Lech_EBA	1968	2029-1897calBCE(3609±22BP,MAMS-18896)	Germany	48.2666	10.8786	25780	PASS(literature)	Germany_Lech_EBA
OBKR_67_d	M	Germany_Lech_EBA	1956	2026-1890calBCE(3599±22BP,MAMS-18897)	Germany	48.2666	10.8786	38319	PASS(literature)	Germany_Lech_EBA
OBKR_80	M	Germany_Lech_EBA	2050	2136-1955calBCE(3664±24BP,MAMS-18901)	Germany	48.2666	10.8786	742188	PASS(Xcontam=[0.005,0.01])	Germany_Lech_EBA
OBKR_93_d	F	Germany_Lech_EBA	1983	2112-1897calBCE(3621±23BP,MAMS-18908)	Germany	48.2666	10.8786	19236	PASS(literature)	Germany_Lech_EBA
OBKR_9A_d	F	Germany_Lech_EBA	1952	2026-1888calBCE(3596±22BP,MAMS-18891)	Germany	48.2666	10.8786	73105	PASS(literature)	Germany_Lech_EBA
POST_28	M	Germany_Lech_EBA	1967	2027-1898calBCE(3608±20BP,MAMS-18960)	Germany	48.2957	10.891	490352	PASS(literature)	Germany_Lech_EBA
POST_35_d	F	Germany_Lech_EBA	1982	2035-1899calBCE(3621±20BP,MAMS-18962)	Germany	48.2957	10.891	196889	PASS(literature)	Germany_Lech_EBA
POST_99_d	F	Germany_Lech_EBA	2012	2133-1931calBCE(3641±25BP,MAMS-18969)	Germany	48.2957	10.891	432280	PASS(literature)	Germany_Lech_EBA
UNTA58_153	M	Germany_Lech_EBA	1889	2008-1775calBCE(3553±24BP,MAMS-18943)	Germany	48.3161	10.892	202316	PASS(literature)	Germany_Lech_EBA
UNTA85_1412	M	Germany_Lech_EBA	1960	2028-1891calBCE(3602±25BP,MAMS-18951)	Germany	48.3197	10.8915	308221	PASS(Xcontam=[0.006,0.053])	Germany_Lech_EBA
WEHR_1192SkB_d	F	Germany_Lech_EBA	1835	1926-1769calBCE(3523±18BP,MAMS-18923)	Germany	48.2528	10.8088	25921	PASS(literature)	Germany_Lech_EBA
WEHR_1586_d	F	Germany_Lech_EBA	1885	1952-1776calBCE(3550±19BP,MAMS-18932)	Germany	48.2528	10.8088	383175	PASS(literature)	Germany_Lech_EBA
OTTM_142_d	F	Germany_Lech_MBA	1577	1687-1502calBCE(3309±37BP,MAMS-21554)	Germany	48.2252	10.8498	56011	PASS(literature)	Germany_Lech_MBA
OTTM_151ind1_d	F	Germany_Lech_MBA	1652	1746-1536calBCE(3370±38BP,MAMS-21555)	Germany	48.2252	10.8498	42180	PASS(literature)	Germany_Lech_MBA
OTTM_151ind2_d	F	Germany_Lech_MBA	1557	1617-1504calBCE(3288±27BP,MAMS-21556)	Germany	48.2252	10.8498	222578	PASS(literature)	Germany_Lech_MBA
OTTM_154	M	Germany_Lech_MBA	1759	1943-1543calBCE(3449±72BP,MAMS-21558)	Germany	48.2252	10.8498	41813	PASS(literature)	Germany_Lech_MBA
OTTM_156	M	Germany_Lech_MBA	1498	1606-1434calBCE(3241±28BP,MAMS-21559)	Germany	48.2252	10.8498	138644	PASS(literature)	Germany_Lech_MBA
OTTM_165_d	F	Germany_Lech_MBA	1622	1736-1535calBCE(3349±29BP,MAMS-21561)	Germany	48.2252	10.8498	17852	PASS(literature)	Germany_Lech_MBA
OTTM_87_d	F	Germany_Lech_MBA	1590	1687-1509calBCE(3324±34BP,MAMS-21544)	Germany	48.2252	10.8498	65490	PASS(literature)	Germany_Lech_MBA
I0118	F	Germany_LN_Alberstedt	2375	2469-2238calBCE(3892±32BP,MAMS-21492)	Germany	51.45	11.63	1048626	PASS	Germany_LN_Alberstedt
I0550	F	Germany_LN_Karsdorf	2519	2572-2467calBCE(3993±21BP,MAMS-23344)	Germany	51.2831	11.65	161187	PASS	Germany_LN_Karsdorf
I0559	M	Germany_MN_Baalberge	3580	3646-3528calBCE(4815±26BP,MAMS-22818)	Germany	51.792	11.142	175263	PASS	Germany_MN_Baalberge		Neolithic_Europe_pooled
I0560	F	Germany_MN_Baalberge	3521	3637-3376calBCE(4745±52BP,Erl-7856)	Germany	51.792	11.142	375978	PASS	Germany_MN_Baalberge		Neolithic_Europe_pooled
I0807	M	Germany_MN_Baalberge	3849	3977-3659calBCE(5061±62BP,Erl-7784)	Germany	51.42	11.68	91637	PASS	Germany_MN_Baalberge		Neolithic_Europe_pooled
I0172	M	Germany_MN_Esperstedt	3205	3363-3029calBCE(4502±48BP,Erl-8699)	Germany	51.42	11.68	1035229	PASS(Xcontam=0.007,mtmatchmax=0.966-0.989)	Germany_MN_Esperstedt		Neolithic_Europe_pooled
I0551	M	Germany_MN_Salzmuende	3213	3400-3025BCE	Germany	51.5331	11.8331	102382	PASS	Germany_MN_Salzmuende		Neolithic_Europe_pooled
I0800	F	Germany_MN_Salzmuende	3214	3348-3097calBCE(4498±27BP,KIA-31459)	Germany	51.5331	11.8331	23827	PASS	Germany_MN_Salzmuende		Neolithic_Europe_pooled
I0802	M	Germany_MN_Salzmuende	3213	3400-3025BCE	Germany	51.5331	11.8331	20614	PASS	Germany_MN_Salzmuende		Neolithic_Europe_pooled
I0166	F	Germany_N_published	4450	4600-4300BCE	Germany	51.8958	11.0467	116036	PASS	Germany_N_published		Neolithic_Europe_pooled
MX259	M	Germany_SouthernGermany_Anselfingen_EBA	2296	2453-2202calBCE(3840±24BP,MAMS-23398)	Germany	47.8541	8.77374	288392	PASS	Germany_SouthernGermany_Anselfingen_EBA
MX252	M	Germany_SouthernGermany_Singen_EBA	1858	1945-1772calBCE(3537±22BP,MAMS-21973)	Germany	47.7671	8.87224	418300	PASS	Germany_SouthernGermany_Singen_EBA
MX254	M	Germany_SouthernGermany_Singen_EBA	1950	2250-1650BCE	Germany	47.7671	8.87224	623155	PASS	Germany_SouthernGermany_Singen_EBA
MX256	F	Germany_SouthernGermany_Singen_EBA	2013	2135-1901calBCE(3641±29BP,MAMS-21971)	Germany	47.7671	8.87224	53894	PASS	Germany_SouthernGermany_Singen_EBA
MX257	M	Germany_SouthernGermany_Singen_EBA	1792	1880-1694calBCE(3463±21BP,BE-9212.1.1)	Germany	47.7671	8.87224	406564	PASS	Germany_SouthernGermany_Singen_EBA
MX258	M	Germany_SouthernGermany_Singen_EBA	1967	2029-1895calBCE(3608±23BP,BE-9207.1.1)	Germany	47.7671	8.87224	191001	PASS	Germany_SouthernGermany_Singen_EBA
MX270	M	Germany_SouthernGermany_Singen_EBA	1950	2250-1650BCE	Germany	47.7671	8.87224	300174	PASS	Germany_SouthernGermany_Singen_EBA
MX277	F	Germany_SouthernGermany_Singen_EBA	1841	1936-1751calBCE(3526±23BP,BE-9211.1.1)	Germany	47.7671	8.87224	391683	PASS	Germany_SouthernGermany_Singen_EBA
MX279	M	Germany_SouthernGermany_Singen_EBA	1808	1882-1742calBCE(3480±20BP,BE-9213.1.1)	Germany	47.7671	8.87224	339879	PASS	Germany_SouthernGermany_Singen_EBA
MX280	F	Germany_SouthernGermany_Singen_EBA	1981	2111-1897calBCE(3620±22BP,MAMS-21975)	Germany	47.7671	8.87224	580172	PASS	Germany_SouthernGermany_Singen_EBA
MX288	M	Germany_SouthernGermany_Singen_EBA	2101	2201-1985calBCE(3712±29BP,MAMS-21968)	Germany	47.7671	8.87224	615162	PASS	Germany_SouthernGermany_Singen_EBA
I10940	M	Gibraltar_EBA	1650	1900-1400BCE	Gibraltar	36.132	-5.34377	32841	PASS(damage.ds.half=0.032)	Gibraltar_EBA
I10941	M	Gibraltar_EBA	1650	1900-1400BCE	Gibraltar	36.132	-5.34377	438556	PASS	Gibraltar_EBA
I10942	F	Gibraltar_EN	5000	5500-4500BCE	Gibraltar	36.132	-5.34377	366907	PASS	Gibraltar_EN		Neolithic_Europe_pooled
GoyetQ-2	M	Belgium_UP_Magdalenian	13127	13305-12976calBCE(12650±50BP,GrA-46168)	Belgium	50.446	5.008	422402	PASS(manual.QC)	GoyetQ2
AV1	F	Hungary_Avar_5	-590	549-640calCE(1487±26BP)	Hungary	46.2833	17.85	802843	PASS(literature)	Hungary_Avar
CO1.SG	F	Hungary_Baden_LateCA.SG	3069	3320-2922calBCE(4421±27BP,MAMS-14825)	Hungary	47.167	19.833	704865	PASS	Hungary_Baden_LateCA.SG		Neolithic_Europe_pooled
I1908	F	Hungary_C_Balaton_Lasinja	4100	4300-3900BCE	Hungary	46.7099	17.2394	542798	PASS	Hungary_C_Balaton_Lasinja
I1909	F	Hungary_C_Balaton_Lasinja	4136	4239-4046calBCE(5300±23BP,MAMS-14132)	Hungary	45.993	18.5813	486998	PASS	Hungary_C_Balaton_Lasinja
I2394	M	Hungary_C_Balaton_Lasinja	4281	4341-4176calBCE(5418±29BP,MAMS-14828)	Hungary	47.1026	17.913	58242	PASS	Hungary_C_Balaton_Lasinja
I4189	F	Hungary_C_Balaton_Lasinja	4100	4300-3900BCE	Hungary	46.2045	18.7299	764910	PASS	Hungary_C_Balaton_Lasinja
I2353	M	Hungary_EarlyC_Tiszapolgar	4250	4500-4000BCE	Hungary	47.4592	20.5128	270298	PASS	Hungary_EarlyC_Tiszapolgar		Neolithic_Europe_pooled
I2354	M	Hungary_EarlyC_Tiszapolgar	4250	4500-4000BCE	Hungary	47.4592	20.5128	352528	PASS	Hungary_EarlyC_Tiszapolgar		Neolithic_Europe_pooled
I2395	M	Hungary_EarlyC_Tiszapolgar	4250	4500-4000BCE	Hungary	47.4592	20.5128	119952	PASS	Hungary_EarlyC_Tiszapolgar		Neolithic_Europe_pooled
I2793_published	M	Hungary_EarlyC_Tiszapolgar_Bodrogkeresztur_published	4323	4442-4250calBCE(5480±35BP,Poz-83629)	Hungary	47.1916	20.4023	850019	PASS(X-contam=0.005)	Hungary_EarlyC_Tiszapolgar_Bodrogkeresztur_published
I2364	M	Hungary_EBA_BellBeaker	2270	2403-2153calBCE(3829±21BP)[R_combine:(3779±28BP,DeA-6748);(3883±29BP,DeA-7215)]	Hungary	47.5992	19.0546	767419	PASS	Hungary_EBA_BellBeaker
I2365	M	Hungary_EBA_BellBeaker	2349	2459-2209calBCE(3865±22BP)[R_combine:(3858±32BP,DeA-6762);(3871±29BP,DeA-7220)]	Hungary	47.5992	19.0546	922704	PASS(mtmatchmax=0.959-0.989)	Hungary_EBA_BellBeaker
I2741	M	Hungary_EBA_BellBeaker	2295	2456-2150calBCE(3835±35BP,Poz-83641)	Hungary	47.3832	19.0203	871912	PASS	Hungary_EBA_BellBeaker
I2786	M	Hungary_EBA_BellBeaker	2320	2457-2204calBCE(3850±35BP,Poz-83639)	Hungary	47.3832	19.0203	795354	PASS(mtcontam=[0.938,0.956])	Hungary_EBA_BellBeaker
I2787	M	Hungary_EBA_BellBeaker	2304	2456-2200calBCE(3840±35BP,Poz-83640)	Hungary	47.3832	19.0203	669314	PASS	Hungary_EBA_BellBeaker
I3528	M	Hungary_EBA_BellBeaker	2414	2562-2299calBCE(3931±31BP,DeA-11507)	Hungary	47.6209	19.0449	224817	PASS	Hungary_EBA_BellBeaker
I3529	F	Hungary_EBA_BellBeaker	2350	2500-2200BCE	Hungary	47.6209	19.0449	560151	PASS	Hungary_EBA_BellBeaker
I4131	F	Hungary_EBA_BellBeaker	2355	2464-2209calBCE(3874±33BP,DeA-2877)	Hungary	47.5992	19.0546	129598	PASS	Hungary_EBA_BellBeaker
I4178	M	Hungary_EBA_BellBeaker	2350	2500-2200BCE	Hungary	47.3832	19.0203	587361	PASS(mtcontam=[0.918,0.96])	Hungary_EBA_BellBeaker
I7044	M	Hungary_EBA_BellBeaker	2350	2900-1800BCE	Hungary	47.43	19.052	783765	PASS(Xcontam=[0.006,0.011])	Hungary_EBA_BellBeaker
I7045	F	Hungary_EBA_BellBeaker	2281	2440-2201calBCE(3835±20BP,PSUAMS-4040)	Hungary	47.43	19.052	755038	PASS	Hungary_EBA_BellBeaker
I1502	F	Hungary_EBA_Mako	2076	2195-1973calBCE(3686±28BP,OxA-23799)	Hungary	47.167	20.833	795741	PASS	Hungary_EBA_Mako
BR1.SG	F	Hungary_EBA_Mako_published.SG	2076	2195-1973calBCE(3686±28BP,OxA-23799)	Hungary	47.167	20.833	578445	PASS	Hungary_EBA_Mako_published.SG
I7040	F	Hungary_EBA_Protonagyrev	2350	2900-1800BCE	Hungary	47.43	19.052	143092	PASS	Hungary_EBA_Protonagyrev
I7043	M	Hungary_EBA_Protonagyrev	2061	2138-1973calBCE(3670±20BP,PSUAMS-4036)	Hungary	47.43	19.052	801297	PASS	Hungary_EBA_Protonagyrev
I1507	M	Hungary_EN_HG_Koros	5711	5788-5640calBCE(6835±34BP,OxA-23757)	Hungary	47.93	21.2	800965	PASS	Hungary_EN_HG_Koros
I2794	F	Hungary_EN_Koros	5614	5713-5536calBCE(6700±40BP,Poz-83628)	Hungary	47.1916	20.4023	986747	PASS	Hungary_EN_Koros
I0174	M	Hungary_EN_Starcevo_1	5608	5712-5531calBCE(6695±40BP,MAMS-11939)	Hungary	46.2086	18.7	227966	PASS	Hungary_EN_Starcevo
I1876	M	Hungary_EN_Starcevo_1	5591	5656-5536calBCE(6677±27BP,MAMS-11928)	Hungary	46.2086	18.7	212907	PASS	Hungary_EN_Starcevo
I1880	M	Hungary_EN_Starcevo_2	5650	5800-5500BCE	Hungary	45.993	18.5813	810907	PASS(literature,X-contam=0.006;mtcontam=0.96)	Hungary_EN_Starcevo
I2783	M	Hungary_Hunyadihalom_MCHA	4060	4228-3962calBCE(5230±40BP,Poz-83638)	Hungary	46.3348	19.0539	648306	PASS	Hungary_Hunyadihalom_MCHA		Neolithic_Europe_pooled
KO1_published.SG	M	Hungary_EN_HG_Koros_published.SG	5711	5788-5640calBCE(6835±34BP,OxA-23757)	Hungary	47.5592	20.7212	796242	PASS(Xcontam=0.007)	Hungary_Koros		WHG_pooled
I4971	M	Hungary_EN_HG_Koros	5649	5737-5538calBCE(6740±60BP,deb-11804)	Hungary	47.5592	20.7212	393703	PASS	Hungary_Koros
I1497	F	Hungary_LateC_Baden	3069	3320-2922calBCE(4421±27BP,MAMS-14825)	Hungary	47.167	19.833	813947	PASS	Hungary_LateC_Baden		Neolithic_Europe_pooled
I2369	M	Hungary_LateC_Baden	3236	3370-3101calBCE(4545±35BP,Poz-83634)	Hungary	47.6209	19.0449	758484	PASS	Hungary_LateC_Baden		Neolithic_Europe_pooled
I2370	F	Hungary_LateC_Baden	3172	3345-2937calBCE(4460±40BP,Poz-88230)	Hungary	47.3188	19.1669	852351	PASS	Hungary_LateC_Baden		Neolithic_Europe_pooled
I2371	M	Hungary_LateC_Baden	3219	3361-3099calBCE(4520±35BP,Poz-83635)	Hungary	47.3188	19.1669	546806	PASS	Hungary_LateC_Baden		Neolithic_Europe_pooled
I2752	M	Hungary_LateC_Baden	3225	3600-2850BCE	Hungary	46.7847	17.7317	520804	PASS	Hungary_LateC_Baden		Neolithic_Europe_pooled
I2753	M	Hungary_LateC_Baden	3135	3333-2928calBCE(4440±35BP,Poz-88231)	Hungary	46.7847	17.7317	867336	PASS(batch.flag,Xcontam=[0.006,0.013])	Hungary_LateC_Baden		Neolithic_Europe_pooled
I2754	M	Hungary_LateC_Baden	3190	3338-3024calBCE(4465±30BP,Poz-83637)	Hungary	46.7847	17.7317	321304	PASS	Hungary_LateC_Baden		Neolithic_Europe_pooled
I2755	M	Hungary_LateC_Baden	3225	3600-2850BCE	Hungary	46.7847	17.7317	42687	PASS	Hungary_LateC_Baden		Neolithic_Europe_pooled
I2763	F	Hungary_LateC_Baden	3222	3363-3101calBCE(4528±31BP,DeA-14662)	Hungary	46.6658	17.2708	29086	PASS	Hungary_LateC_Baden		Neolithic_Europe_pooled
I2785	F	Hungary_LateC_Baden	3225	3600-2850BCE	Hungary	47.685	19.9184	572729	PASS	Hungary_LateC_Baden		Neolithic_Europe_pooled
I2366_published	M	Hungary_LateC_Baden_published	3168	3340-2937calBCE(4455±35BP,Poz-88227)	Hungary	47.6209	19.0449	798237	PASS(X-contam=0.007;mtcontam=0.96)	Hungary_LateC_Baden_published
I2367_published	M	Hungary_LateC_Baden_published	3135	3333-2928calBCE(4440±35BP,Poz-88228)	Hungary	47.6209	19.0449	836355	PASS(X-contam=0.008)	Hungary_LateC_Baden_published
I5116	F	Hungary_LateC_EBA_Baden_Yamnaya	3150	3300-3000BCE	Hungary	47.8099	20.8893	16043	PASS	Hungary_LateC_EBA_Baden_Yamnaya
I5118	M	Hungary_LateC_EBA_Baden_Yamnaya	3150	3300-3000BCE	Hungary	47.8099	20.8893	690337	PASS	Hungary_LateC_EBA_Baden_Yamnaya
I5119	F	Hungary_LateC_EBA_Baden_Yamnaya	3147	3330-3013calBCE(4445±20BP,PSUAMS-4034)	Hungary	47.8099	20.8893	687360	PASS(damage.ds.half=0.034)	Hungary_LateC_EBA_Baden_Yamnaya
I2788	M	Hungary_LateC_Protoboleraz	3735	3910-3644calBCE(4960±40BP,VERA-5402)	Hungary	47.1891	20.0048	822177	PASS	Hungary_LateC_Protoboleraz		Neolithic_Europe_pooled
I2789	M	Hungary_LateC_Protoboleraz	3700	3800-3600BCE	Hungary	47.1891	20.0048	564162	PASS	Hungary_LateC_Protoboleraz		Neolithic_Europe_pooled
I2790_published	F	Hungary_LateC_Protoboleraz_published	3675	3768-3543calBCE(4890±35BP,Poz-82205)	Hungary	47.1891	20.0048	943394	PASS	Hungary_LateC_Protoboleraz_published
I2791_published	M	Hungary_LateC_Protoboleraz_published	3573	3649-3516calBCE(4800±40BP,Poz-82206)	Hungary	47.1891	20.0048	832892	PASS(X-contam=0.013)	Hungary_LateC_Protoboleraz_published
I1504	M	Hungary_LBA_Kyjatice	908	987-833calBCE(2769±24BP,OxA-27859)	Hungary	47.7251	20.0862	687165	PASS	Hungary_LBA_Kyjatice
BR2.SG	M	Hungary_LBA_Kyjatice.SG	908	987-833calBCE(2769±24BP,OxA-27859)	Hungary	47.7251	20.0862	1182644	PASS	Hungary_LBA_Kyjatice.SG
I1495	M	Hungary_LN_Lengyel	4417	4496-4353calBCE(5598±32BP,MAMS-14819)	Hungary	47.167	19.833	829966	PASS	Hungary_LN_Lengyel
I1899	M	Hungary_LN_Lengyel	4600	4900-4300BCE	Hungary	47.1026	17.913	321589	PASS	Hungary_LN_Lengyel
I1900	M	Hungary_LN_Lengyel	4736	4797-4619calBCE(5861±26BP,MAMS-14827)	Hungary	47.1026	17.913	60886	PASS	Hungary_LN_Lengyel
I1901	M	Hungary_LN_Lengyel	4600	4900-4300BCE	Hungary	47.1026	17.913	486293	PASS	Hungary_LN_Lengyel
I1906	M	Hungary_LN_Lengyel	4600	4900-4300BCE	Hungary	47.5106	18.6169	448340	PASS	Hungary_LN_Lengyel
I2352	M	Hungary_LN_Lengyel	4600	4900-4300BCE	Hungary	47.1026	17.913	114712	PASS(mtcontam=[0.962,0.976])	Hungary_LN_Lengyel
I1902_published	M	Hungary_LN_Lengyel_published	4600	4900-4300BCE	Hungary	47.0194	17.9624	170342	PASS(mtcontam=0.96)	Hungary_LN_Lengyel_published
I1905_published	M	Hungary_LN_Lengyel_published	4714	4834-4556calBCE(5850±40BP,Poz-82582)	Hungary	47.5106	18.6169	384045	PASS(mtcontam=0.98)	Hungary_LN_Lengyel_published
I1890	M	Hungary_LN_Sopot	4925	5100-4750BCE	Hungary	46.4159	18.9197	101919	PASS	Hungary_LN_Sopot		Neolithic_Europe_pooled
I1891	F	Hungary_LN_Sopot	4963	5203-4841calBCE(6060±40BP,Poz-83633)	Hungary	46.4159	18.9197	411794	PASS	Hungary_LN_Sopot		Neolithic_Europe_pooled
I1893	M	Hungary_LN_Sopot	4945	5034-4846calBCE(6049±29BP,MAMS-14817)	Hungary	46.2045	18.7299	59294	PASS	Hungary_LN_Sopot		Neolithic_Europe_pooled
I4184	F	Hungary_LN_Sopot	4804	4932-4714calBCE(5930±40BP,Beta-310040)	Hungary	46.0254	18.3251	425704	PASS	Hungary_LN_Sopot		Neolithic_Europe_pooled
I4185	M	Hungary_LN_Sopot	4923	5026-4837calBCE(6032±32BP,MAMS-14814)	Hungary	46.2045	18.7299	38275	PASS	Hungary_LN_Sopot		Neolithic_Europe_pooled
I0449	M	Hungary_LN_Tisza	4750	5000-4500BCE	Hungary	46.3559	20.2782	955623	PASS(Xcontam=0.007)	Hungary_LN_Tisza		Neolithic_Europe_pooled
I2358	F	Hungary_LN_Tisza	4750	5000-4500BCE	Hungary	47.4592	20.5128	362236	PASS	Hungary_LN_Tisza		Neolithic_Europe_pooled
I2387	M	Hungary_LN_Tisza	4750	5000-4500BCE	Hungary	46.3941	20.245	68780	PASS(damage.ds.half=0.045)	Hungary_LN_Tisza		Neolithic_Europe_pooled
I2746	M	Hungary_LN_Tisza	4750	5000-4500BCE	Hungary	46.9396	21.2091	104785	PASS	Hungary_LN_Tisza		Neolithic_Europe_pooled
I0447_published	F	Hungary_LN_Tisza_published	4750	5000-4500BCE	Hungary	46.3559	20.2782	66240	PASS(damage.ds.half=0.046,mtcontam=[0.934,0.958])	Hungary_LN_Tisza_published
RISE349.SG	F	Hungary_Maros_EBA.SG	1943	2034-1780calBCE(3588±34BP,OxA-30987)	Hungary	46.356	20.985	92396	PASS(literature)	Hungary_Maros_EBA.SG
RISE371.SG	F	Hungary_Maros_EBA.SG	2032	2137-1939calBCE(3653±32BP,OxA-30988)	Hungary	46.22	20.199	51763	PASS(literature)	Hungary_Maros_EBA.SG
RISE373.SG	F	Hungary_Maros_EBA.SG	1801	1887-1694calBCE(3476±30BP,OxA-31104)	Hungary	46.22	20.199	250888	PASS(literature)	Hungary_Maros_EBA.SG
RISE374.SG	M	Hungary_Maros_EBA.SG	1693	1872-1565calBCE(3402±34BP,OxA-30989)	Hungary	46.22	20.199	143488	PASS(literature)	Hungary_Maros_EBA.SG
RISE247.SG	M	Hungary_MBA_Vatya.SG	1657	1743-1544calBCE(3372±29BP,OxA-29769)	Hungary	47.327	18.962	233887	PASS(literature)	Hungary_MBA_Vatya.SG
RISE254.SG	M	Hungary_MBA_Vatya.SG	1998	2130-1898calBCE(3631±29BP,OxA-29842)	Hungary	47.327	18.962	42379	PASS(literature)	Hungary_MBA_Vatya.SG
RISE480.SG	F	Hungary_MBA_Vatya.SG	1600	1700-1500BCE	Hungary	47.341	18.896	153887	PASS(literature)	Hungary_MBA_Vatya.SG
RISE483.SG	F	Hungary_MBA_Vatya.SG	1750	2000-1500BCE	Hungary	47.341	18.896	130881	PASS(literature)	Hungary_MBA_Vatya.SG
RISE484.SG	F	Hungary_MBA_Vatya.SG	1750	2000-1500BCE	Hungary	47.341	18.896	163477	PASS(literature)	Hungary_MBA_Vatya.SG
I7042	M	Hungary_MN	4136	4239-4046calBCE(5300±25BP,PSUAMS-4035)	Hungary	47.43	19.052	783888	PASS	Hungary_MN		Neolithic_Europe_pooled
I2355	F	Hungary_MN_ALBK_Szakalhat	5100	5300-4900BCE	Hungary	47.4592	20.5128	270240	PASS	Hungary_MN_ALBK_Szakalhat		Neolithic_Europe_pooled
I2357	F	Hungary_MN_ALBK_Szakalhat	5100	5300-4900BCE	Hungary	47.4592	20.5128	180744	PASS	Hungary_MN_ALBK_Szakalhat		Neolithic_Europe_pooled
I1498	F	Hungary_MN_ALPc	5144	5297-5048calBCE(6207±30BP,OxA-27858)	Hungary	47.5247	21.5856	810430	PASS	Hungary_MN_ALPc		Neolithic_Europe_pooled
I1500	M	Hungary_MN_ALPc	5108	5301-4940calBCE(6164±64BP,OxA-23763)	Hungary	47.167	20.833	830691	PASS	Hungary_MN_ALPc		Neolithic_Europe_pooled
I1505	F	Hungary_MN_ALPc	5107	5210-5003calBCE(6153±33BP,OxA-28020)	Hungary	47.88	21.19	769987	PASS	Hungary_MN_ALPc		Neolithic_Europe_pooled
I1506	F	Hungary_MN_ALPc	5196	5306-5064calBCE(6237±32BP,OxA-27861)	Hungary	47.88	21.19	704606	PASS	Hungary_MN_ALPc		Neolithic_Europe_pooled
I3535	M	Hungary_MN_ALPc	5118	5217-4997calBCE(6170±40BP,Poz-83632)	Hungary	47.8576	21.4324	265599	PASS	Hungary_MN_ALPc		Neolithic_Europe_pooled
I4188	M	Hungary_MN_ALPc	5100	5300-4900BCE	Hungary	47.8651	21.1253	290631	PASS	Hungary_MN_ALPc		Neolithic_Europe_pooled
I1499	F	Hungary_MN_ALPc_Bukk	5127	5286-5015calBCE(6185±34BP,OxA-27732)	Hungary	48.52	21.168	817728	PASS	Hungary_MN_ALPc_Bukk		Neolithic_Europe_pooled
NE3.SG	F	Hungary_MN_ALPc_Bukk.SG	5127	5286-5015calBCE(6185±34BP,OxA-27732)	Hungary	48.52	21.168	106388	PASS	Hungary_MN_ALPc_Bukk.SG		Neolithic_Europe_pooled
I4186	F	Hungary_MN_ALPc_Esztar	5100	5300-4900BCE	Hungary	47.4776	21.503	61032	PASS	Hungary_MN_ALPc_Esztar		Neolithic_Europe_pooled
I4187	M	Hungary_MN_ALPc_Esztar	5100	5300-4900BCE	Hungary	47.4804	21.5019	47926	PASS	Hungary_MN_ALPc_Esztar		Neolithic_Europe_pooled
I2384_published	M	Hungary_MN_ALPc_published	5164	5305-5046calBCE(6220±40BP,Poz-83631)	Hungary	47.8576	21.4324	683331	PASS(X-contam=0.013;mtcontam=0.95)	Hungary_MN_ALPc_published		Neolithic_Europe_pooled
NE2.SG	F	Hungary_MN_ALPc_published.SG	5144	5297-5048calBCE(6207±30BP,OxA-27858)	Hungary	47.5247	21.5856	168694	PASS	Hungary_MN_ALPc_published.SG		Neolithic_Europe_pooled
I2743	M	Hungary_MN_ALPc_Szakalhat	5100	5300-4900BCE	Hungary	47.1788	19.8605	252605	PASS(mtcontam=0.871)	Hungary_MN_ALPc_Szakalhat		Neolithic_Europe_pooled
I2744	M	Hungary_MN_ALPc_Szakalhat	5100	5300-4900BCE	Hungary	47.1788	19.8605	298345	PASS	Hungary_MN_ALPc_Szakalhat		Neolithic_Europe_pooled
I2745	F	Hungary_MN_ALPc_Szakalhat	5100	5300-4900BCE	Hungary	47.1788	19.8605	197563	PASS	Hungary_MN_ALPc_Szakalhat		Neolithic_Europe_pooled
I2380	F	Hungary_MN_ALPc_Szatmar	5400	5500-5300BCE	Hungary	47.7813	20.5826	740659	PASS	Hungary_MN_ALPc_Szatmar
I2382	M	Hungary_MN_ALPc_Szatmar	5400	5500-5300BCE	Hungary	47.7813	20.5826	49621	PASS	Hungary_MN_ALPc_Szatmar
I2375	M	Hungary_MN_ALPc_Tiszadob	5100	5300-4900BCE	Hungary	48.0036	21.1765	120796	PASS	Hungary_MN_ALPc_Tiszadob		Neolithic_Europe_pooled
I2376	M	Hungary_MN_ALPc_Tiszadob	5100	5300-4900BCE	Hungary	48.0036	21.1765	386187	PASS(mtcontam=[0.855,0.932],Xcontam=[0,0.014])	Hungary_MN_ALPc_Tiszadob		Neolithic_Europe_pooled
I2377	M	Hungary_MN_ALPc_Tiszadob	5051	5210-4935calBCE(6110±40BP,Poz-83630)	Hungary	48.0036	21.1765	649593	PASS	Hungary_MN_ALPc_Tiszadob		Neolithic_Europe_pooled
I2378	M	Hungary_MN_ALPc_Tiszadob	5100	5300-4900BCE	Hungary	47.8607	21.0006	105512	PASS	Hungary_MN_ALPc_Tiszadob		Neolithic_Europe_pooled
I2379	M	Hungary_MN_ALPc_Tiszadob	5034	5209-4855calBCE(6100±40BP,Poz-88115)	Hungary	47.8607	21.0006	618281	PASS	Hungary_MN_ALPc_Tiszadob		Neolithic_Europe_pooled
I4199	F	Hungary_MN_ALPc_Tiszadob	5100	5300-4900BCE	Hungary	48.0036	21.1765	269420	PASS	Hungary_MN_ALPc_Tiszadob		Neolithic_Europe_pooled
NE4.SG	F	Hungary_MN_ALPc.SG	5107	5210-5003calBCE(6153±33BP,OxA-28020)	Hungary	47.8465	21.1494	84128	PASS	Hungary_MN_ALPc.SG		Neolithic_Europe_pooled
NE5.SG	M	Hungary_MN_ALPc.SG	5108	5301-4940calBCE(6164±64BP,OxA-23763)	Hungary	47.167	20.833	679518	PASS(Xcontam=0.008)	Hungary_MN_ALPc.SG		Neolithic_Europe_pooled
I0176	F	Hungary_MN_LBK	5052	5209-4939calBCE(6110±30BP,Beta-310038)	Hungary	46.4	18.74	69444	PASS	Hungary_MN_LBK		Neolithic_Europe_pooled
I1496	M	Hungary_MN_LBK	5090	5211-4958calBCE(6135±33BP,MAMS-14821)	Hungary	47.167	19.833	812201	PASS(mtcontam=[0.963,0.976])	Hungary_MN_LBK		Neolithic_Europe_pooled
I1882	M	Hungary_MN_LBK	5100	5300-4900BCE	Hungary	47.5016	18.9105	176572	PASS	Hungary_MN_LBK		Neolithic_Europe_pooled
I1904	M	Hungary_MN_LBK	5060	5209-4941calBCE(6115±35BP,Poz-82584)	Hungary	46.2049	18.7004	804922	PASS	Hungary_MN_LBK		Neolithic_Europe_pooled
I3536	F	Hungary_MN_LBK	5100	5300-4900BCE	Hungary	47.6387	17.3645	32582	PASS	Hungary_MN_LBK		Neolithic_Europe_pooled
I4196	F	Hungary_MN_LBK	5100	5300-4900BCE	Hungary	47.5016	18.9105	638509	PASS	Hungary_MN_LBK		Neolithic_Europe_pooled
I2739_published	M	Hungary_MN_LBK_published	5208	5307-5069calBCE(6244±34BP,SUERC-51459)	Hungary	46.2086	18.7	749828	PASS(X-contam=0.008)	Hungary_MN_LBK_published
NE6.SG	M	Hungary_MN_LBK_published.SG	5090	5211-4958calBCE(6135±33BP,MAMS-14821)	Hungary	47.167	19.833	767477	PASS(Xcontam=0.006)	Hungary_MN_LBK_published.SG
NE1.SG	F	Hungary_MN_LBK.SG	5196	5306-5064calBCE(6237±32BP,OxA-27861)	Hungary	47.8465	21.1494	1152433	PASS(literature)	Hungary_MN_LBK.SG		Neolithic_Europe_pooled
I1887	M	Hungary_MN_Vinca	5200	5400-5000BCE	Hungary	45.5853	18.3077	379728	PASS	Hungary_MN_Vinca		Neolithic_Europe_pooled
I1894	F	Hungary_MN_Vinca	5200	5400-5000BCE	Hungary	45.5853	18.3077	15436	PASS	Hungary_MN_Vinca		Neolithic_Europe_pooled
I1896	M	Hungary_MN_Vinca	5240	5317-5074calBCE(6264±34BP,OxA-29050)	Hungary	45.5969	18.2825	245617	PASS	Hungary_MN_Vinca		Neolithic_Europe_pooled
I1895_published	F	Hungary_MN_Vinca_published	5245	5318-5077calBCE(6267±33BP,MAMS-14809)	Hungary	45.5969	18.2825	673444	PASS	Hungary_MN_Vinca_published
I1661	F	Iran_C_SehGabi	4589	4700-4461calBCE(5740±40BP,Poz-81104)	Iran	34.5	47.96	837023	PASS	Iran_C_SehGabi		Iran_N_pooled
I1662	M	Iran_C_SehGabi	4727	4836-4610calBCE(5860±40BP,Poz-81105)	Iran	34.5	47.96	607598	PASS	Iran_C_SehGabi		Iran_N_pooled
I1665	F	Iran_C_SehGabi	3869	3957-3792calBCE(5070±30BP,Poz-81106)	Iran	34.5	47.96	730012	PASS	Iran_C_SehGabi		Iran_N_pooled
I1674	M	Iran_C_SehGabi	3881	3978-3798calBCE(5105±35BP,Poz-81108)	Iran	34.5	47.96	624951	PASS	Iran_C_SehGabi		Iran_N_pooled
I2337	M	Iran_C_TepeHissar	3572	3640-3518calBCE(4780±30BP,PSUAMS-1919)	Iran	36.1544	54.3836	521911	PASS	Iran_C_TepeHissar		Iran_N_pooled
I2512	M	Iran_C_TepeHissar	2888	2917-2786calBCE(4265±25BP,PSUAMS-1914)	Iran	36.1544	54.3836	243409	PASS	Iran_C_TepeHissar		Iran_N_pooled
I2514	M	Iran_C_TepeHissar	2397	2471-2299calBCE(3915±25BP,PSUAMS-1918)	Iran	36.1544	54.3836	745066	PASS(batch.flag,mtcontam=[0.909,0.95])	Iran_C_TepeHissar		Iran_N_pooled
I2922	F	Iran_C_TepeHissar	2093	2198-1985calBCE(3705±25BP,PSUAMS-2227)	Iran	36.1544	54.3836	279888	PASS	Iran_C_TepeHissar		Iran_N_pooled
I2923	M	Iran_C_TepeHissar	2757	2879-2632calBCE(4160±25BP,PSUAMS-1915)	Iran	36.1544	54.3836	576483	PASS	Iran_C_TepeHissar		Iran_N_pooled
I2924	F	Iran_C_TepeHissar	2765	2882-2636calBCE(4170±25BP,PSUAMS-2262)	Iran	36.1544	54.3836	601080	PASS(damage.ds.half=0.048)	Iran_C_TepeHissar		Iran_N_pooled
I2925	F	Iran_C_TepeHissar	2765	2882-2636calBCE(4170±25BP,PSUAMS-1913)	Iran	36.1544	54.3836	664720	PASS	Iran_C_TepeHissar		Iran_N_pooled
I2927	M	Iran_C_TepeHissar	2497	2575-2350calBCE(3970±30BP,PSUAMS-1916)	Iran	36.1544	54.3836	404589	PASS	Iran_C_TepeHissar		Iran_N_pooled
I2928	F	Iran_C_TepeHissar	2675	2857-2501calBCE(4095±25BP,PSUAMS-1917)	Iran	36.1544	54.3836	205957	PASS	Iran_C_TepeHissar		Iran_N_pooled
I2921_published	F	Iran_C_TepeHissar_published	3583	3648-3528calBCE(4820±30BP,PSUAMS-1912)	Iran	36.1544	54.3836	180658	PASS	Iran_C_TepeHissar_published
I2328	M	Iran_HajjiFiruz_C	5950	6020-5889calBCE(7075±30BP,PSUAMS-2345)	Iran	36.9944	45.4744	16500	PASS	Iran_HajjiFiruz_C		Iran_N_pooled
I4349	M	Iran_HajjiFiruz_C	5797	5891-5720calBCE(6915±40BP,PSUAMS-2126)	Iran	36.9944	45.4744	916581	PASS(Xcontam=[0.007,0.02])	Iran_HajjiFiruz_C		Iran_N_pooled
I4351	F	Iran_HajjiFiruz_C	5970	6065-5889calBCE(7100±45BP,PSUAMS-2151)	Iran	36.9944	45.4744	745071	PASS	Iran_HajjiFiruz_C		Iran_N_pooled
I1955	F	Iran_GanjDareh_Historic	-1561	1480-1640calCE(330±30BP,Beta-432801)	Iran	34.45	48.116	783840	PASS	Iran_N		Iran_N_pooled
I1290	F	Iran_GanjDareh_N	7856	8170-7606calBCE(8780±50BP,Poz-81100)	Iran	34.45	48.116	838740	PASS(mtmatchmax=0.975-0.998)	Iran_N		Iran_N_pooled
I1945	M	Iran_GanjDareh_N	7850	8000-7700BCE	Iran	34.45	48.116	247405	PASS(Xcontam=[0,0],mtmatchmax=0.933-0.926)	Iran_N		Iran_N_pooled
I1947	M	Iran_GanjDareh_N	8042	8211-7827calBCE(8860±30BP,Beta-432800)	Iran	34.45	48.116	934570	PASS	Iran_N		Iran_N_pooled
I1954	M	Iran_GanjDareh_N	8212	8295-7976calBCE(9000±40BP,Beta-436170)	Iran	34.45	48.116	938523	PASS(mtmatchmax=0.975-0.977)	Iran_N		Iran_N_pooled
I7527	F	Iran_GanjDareh_N	7950	8200-7700BCE	Iran	34.45	48.116	99468	PASS	Iran_N		Iran_N_pooled
I2312_all_published_d	M	Iran_Mesolithic_BeltCave_all_published	10000	12000-8000BCE	Iran	35.591	53.501	30722	PASS	Iran_N		Iran_N_pooled
I1293_all_d	M	Iran_Mesolithic_HotuIIIb	8850	9100-8600BCE	Iran	35.591	53.501	38917	PASS	Iran_N		Iran_N_pooled
AH1.SG	F	Iran_TepeAbdulHosein_N.SG	7975	8250-7700BCE	Iran	34.1883	48.3689	806625	PASS(literature)	Iran_N		Iran_N_pooled
AH2.SG	M	Iran_TepeAbdulHosein_N.SG	7971	8202-7752calBCE(8833±41BP,MAMS-25472)	Iran	34.1883	48.3689	593295	PASS(literature)	Iran_N		Iran_N_pooled
AH4.SG	F	Iran_TepeAbdulHosein_N.SG	7968	8201-7751calBCE(8832±41BP,MAMS-25473)	Iran	34.1883	48.3689	697107	PASS(literature)	Iran_N		Iran_N_pooled
WC1.SG	M	Iran_Wezmeh_N.SG	7264	7461-7076calBCE(8240±56BP,UBA-25840)	Iran	34.6129	47.1057	1180203	PASS(literature)	Iran_N		Iran_N_pooled
rath1.SG	M	Ireland_EBA.SG	1947	2031-1830calBCE(3591±29BP,UBA-8707)	Ireland	55.2921	-6.19168	1181857	PASS(literature)	Ireland_EBA.SG
rath2.SG	M	Ireland_EBA.SG	1869	2026-1700calBCE(3539±54BP,UBA-8705)	Ireland	55.2921	-6.19168	946668	PASS(literature)	Ireland_EBA.SG
rath3.SG	M	Ireland_EBA.SG	1630	1736-1539calBCE(3354±28BP,UBA-8706)	Ireland	55.2921	-6.19168	673050	PASS(literature)	Ireland_EBA.SG
ASH3.SG	M	Ireland_EN_MN.SG	3659	3764-3534calBCE(4876±34BP,UBA-38310)	Ireland	52.9311	-8.18743	823501	PASS(literature)	Ireland_EN_MN.SG
PB357.SG	F	Ireland_EN_MN.SG	3595	3654-3528BCE(4835±28BP)[R_combine:(4762±37BP,UBA-38307;);(4917±40BP,UBA-39192)]	Ireland	52.9855	-9.11145	988628	PASS(literature)	Ireland_EN_MN.SG
PN02.SG	M	Ireland_EN_MN.SG	3596	3706-3521calBCE(4834±45BP,UBA-38313)	Ireland	53.0487	-9.14005	823724	PASS(literature)	Ireland_EN_MN.SG
PN112.SG	M	Ireland_EN_MN.SG	3608	3704-3529calBCE(4845±29BP,OxA-25949)	Ireland	53.0487	-9.14005	675143	PASS(literature)	Ireland_EN_MN.SG
PN13.SG	M	Ireland_EN_MN.SG	3622	3708-3529calBCE(4854±33BP,UBA-39199)	Ireland	53.0487	-9.14005	606212	PASS(literature)	Ireland_EN_MN.SG
PN04.SG	M	Ireland_EN.SG	3792	3946-3653calBCE(4999±48BP,UBA-38312)	Ireland	53.0487	-9.14005	816435	PASS(literature)	Ireland_EN.SG		Neolithic_Europe_pooled
PN05.SG	M	Ireland_EN.SG	3779	3944-3651calBCE(4992±40BP,UBA-38308)	Ireland	53.0487	-9.14005	755606	PASS(literature)	Ireland_EN.SG		Neolithic_Europe_pooled
PN107.SG	M	Ireland_EN.SG	3755	3932-3653calBCE(4983±30BP,OxA-26052)	Ireland	53.0487	-9.14005	871080	PASS(literature)	Ireland_EN.SG		Neolithic_Europe_pooled
PN10_PN113.SG	F	Ireland_EN.SG	3796	3945-3656calBCE(5004±31BP,OxA-25950)	Ireland	53.0487	-9.14005	992511	PASS(literature)	Ireland_EN.SG		Neolithic_Europe_pooled
CAK530.SG	F	Ireland_LN.SG	2761	2884-2631calBCE(4170±32BP,OxA-35325)	Ireland	54.0586	-8.38206	735132	PASS(literature)	Ireland_LN.SG		Neolithic_Europe_pooled
CAK531.SG	M	Ireland_LN.SG	2751	2883-2625calBCE(4160±38BP,UBA-38306)	Ireland	54.0586	-8.38206	692748	PASS(literature)	Ireland_LN.SG		Neolithic_Europe_pooled
CAK532.SG	M	Ireland_LN.SG	2942	3013-2890calBCE(4321±30BP,OxA-35326)	Ireland	54.0586	-8.38206	1014376	PASS(literature)	Ireland_LN.SG		Neolithic_Europe_pooled
CAK533.SG	F	Ireland_LN.SG	2976	3087-2902calBCE(4360±31BP,OxA-35327)	Ireland	54.0586	-8.38206	931713	PASS(literature)	Ireland_LN.SG		Neolithic_Europe_pooled
CAK68.SG	M	Ireland_LN.SG	2553	2834-2466calBCE(4031±37BP,UBA-30808)	Ireland	54.0586	-8.38206	884941	PASS(literature)	Ireland_LN.SG		Neolithic_Europe_pooled
car004-ALL_DATA.SG	M	Ireland_Megalithic.SG	3567	3638-3386calBCE(4770±30BP,Beta-468275)	Ireland	54.251	-8.519	21252	PASS(literature)	Ireland_Megalithic.SG
prs002-ALL_DATA.SG	F	Ireland_Megalithic.SG	3715	3785-3649calBCE(4950±30BP,Beta-446171)	Ireland	54.2469	-8.55609	1119566	PASS(literature)	Ireland_Megalithic.SG
prs003-ALL_DATA.SG	M	Ireland_Megalithic.SG	3693	3769-3642calBCE(4920±30BP,Beta-468277)	Ireland	54.2469	-8.55609	86268	PASS(literature)	Ireland_Megalithic.SG
prs006-ALL_DATA.SG	F	Ireland_Megalithic.SG	3530	3633-3378calBCE(4740±30BP,Beta-446177)	Ireland	54.2469	-8.55609	141557	PASS(literature)	Ireland_Megalithic.SG
prs009-ALL_DATA.SG	M	Ireland_Megalithic.SG	3315	3519-3111calBCE[unionoftwodates:3519-3370calBCE(4670±30BP,Beta-446174);3500-3111calBCE(4590±30BP,Beta-446175)]	Ireland	54.2469	-8.55609	1122257	PASS(literature)	Ireland_Megalithic.SG
prs010-ALL_DATA.SG	M	Ireland_Megalithic.SG	3572	3640-3518calBCE(4780±30BP,Beta-446176)	Ireland	54.2469	-8.55609	94201	PASS(literature)	Ireland_Megalithic.SG
prs012-ALL_DATA.SG	M	Ireland_Megalithic.SG	3700	3771-3645calBCE(4930±30BP,Beta-446178)	Ireland	54.2469	-8.55609	122942	PASS(literature)	Ireland_Megalithic.SG
prs013-ALL_DATA.SG	M	Ireland_Megalithic.SG	3453	3605-3370calBCE(4690±30BP,Beta-446179)	Ireland	54.2469	-8.55609	1145014	PASS(literature)	Ireland_Megalithic.SG
prs016-ALL_DATA.SG	M	Ireland_Megalithic.SG	3589	3651-3528calBCE(4830±30BP,Beta-446180)	Ireland	54.2469	-8.55609	1161741	PASS(literature)	Ireland_Megalithic.SG
prs018-ALL_DATA.SG	M	Ireland_Megalithic.SG	3693	3769-3642calBCE(4920±30BP,Beta-446182)	Ireland	54.2469	-8.55609	61315	PASS(literature)	Ireland_Megalithic.SG
KGH6.SG	M	Ireland_Mesolithic.SG	4708	4797-4602calBCE(5844±35BP,UBA-40235)	Ireland	52.5985	-8.32836	728600	PASS(literature)	Ireland_Mesolithic.SG
SRA62.SG	M	Ireland_Mesolithic.SG	4051	4226-3961calBCE(5227±36BP,UB-15772)	Ireland	54.297	-8.33599	1181198	PASS(literature)	Ireland_Mesolithic.SG
ANN1.SG	M	Ireland_MN.SG	3455	3637-3191calBCE(4670±70BP,GrA-1703)	Ireland	52.6764	-8.45533	831026	PASS(literature)	Ireland_MN.SG
ANN2.SG	M	Ireland_MN.SG	3571	3707-3378calBCE(4810±60BP,GrA-1707)	Ireland	52.6764	-8.45533	342270	PASS(literature)	Ireland_MN.SG
ARD2.SG	M	Ireland_MN.SG	3451	3599-3366calBCE(4675±35BP,GrN-9708)	Ireland	52.935	-8.15417	954039	PASS(literature)	Ireland_MN.SG
ASH1.SG	M	Ireland_MN.SG	3551	3640-3380calBCE(4765±40BP,GrN-11036)	Ireland	52.9311	-8.18743	678192	PASS(literature)	Ireland_MN.SG
BG72.SG	M	Ireland_MN.SG	3517	3633-3377calBCE(4735±35BP,GrN-11362)	Ireland	52.8074	-6.82331	863198	PASS(literature)	Ireland_MN.SG
CH448.SG	M	Ireland_MN.SG	3567	3646-3383calBCE(4790±41BP,UBA-35070)	Ireland	54.0548	-7.02675	887525	PASS(literature)	Ireland_MN.SG
GNM1007.SG	M	Ireland_MN.SG	3338	3513-3103calBCE(4588±40BP,UBA-38829)	Ireland	53.9697	-9.632	667912	PASS(literature)	Ireland_MN.SG
GNM1076.SG	M	Ireland_MN.SG	3185	3366-2935calBCE(4488±62BP,UBA-37807)	Ireland	53.9697	-9.632	754674	PASS(literature)	Ireland_MN.SG
MB6.SG	M	Ireland_MN.SG	3242	3494-3036calBCE(4548±51BP,UBA-35071)	Ireland	54.3638	-5.48603	808952	PASS(literature)	Ireland_MN.SG
NG10.SG	M	Ireland_MN.SG	3201	3339-3028calBCE(4473±29BP,OxA-36079)	Ireland	53.6948	-6.4757	1182144	PASS(literature)	Ireland_MN.SG
NGZ1.SG	F	Ireland_MN.SG	3074	3322-2921calBCE(4421±30BP,OxA-36080)	Ireland	53.6953	-6.4751	499030	PASS(literature)	Ireland_MN.SG
PB1327.SG	M	Ireland_MN.SG	3457	3626-3356calBCE(4667±54BP,UBA-39195)	Ireland	52.9855	-9.11145	607658	PASS(literature)	Ireland_MN.SG
PB1794.SG	F	Ireland_MN.SG	3536	3642-3377calBCE(4764±54BP,UBA-39197)	Ireland	52.9855	-9.11145	478295	PASS(literature)	Ireland_MN.SG
PB186.SG	M	Ireland_MN.SG	3443	3516-3359calBCE(4638±36BP,UBA-35072)	Ireland	52.9855	-9.11145	947579	PASS(literature)	Ireland_MN.SG
PB2031.SG	M	Ireland_MN.SG	3481	3628-3373calBCE(4712±35BP,UBA-38304)	Ireland	52.9855	-9.11145	785199	PASS(literature)	Ireland_MN.SG
PB443.SG	M	Ireland_MN.SG	3524	3634-3378calBCE(4739±35BP,UBA-38303)	Ireland	52.9855	-9.11145	1037112	PASS(literature)	Ireland_MN.SG
PB581.SG	M	Ireland_MN.SG	3463	3625-3363calBCE(4679±48BP,UBA-38316)	Ireland	52.9855	-9.11145	956758	PASS(literature)	Ireland_MN.SG
PB672.SG	M	Ireland_MN.SG	3492	3628-3376BCE(4722±27BP)[R_combine:(4765±32BP,UBA-35067;);(4636±45BP,UBA-39193)]	Ireland	52.9855	-9.11145	1018260	PASS(literature)	Ireland_MN.SG
PB675.SG	M	Ireland_MN.SG	3221	3362-3102BCE(4527±27BP)[R_combine:(4394±35BP,UBA-35064;);(4707±42BP,UBA-39194)]	Ireland	52.9855	-9.11145	1182115	PASS(literature)	Ireland_MN.SG
PB754.SG	F	Ireland_MN.SG	3425	3523-3193calBCE(4622±41BP,UBA-39196)	Ireland	52.9855	-9.11145	441981	PASS(literature)	Ireland_MN.SG
PB768.SG	M	Ireland_MN.SG	3525	3639-3376calBCE(4751±55BP,UBA-38309)	Ireland	52.9855	-9.11145	772594	PASS(literature)	Ireland_MN.SG
PN03.SG	M	Ireland_MN.SG	3510	3633-3376calBCE(4732±43BP,UBA-38317)	Ireland	53.0487	-9.14005	794455	PASS(literature)	Ireland_MN.SG
PN06.SG	M	Ireland_MN.SG	3509	3633-3376calBCE(4731±42BP,UBA-38311)	Ireland	53.0487	-9.14005	778828	PASS(literature)	Ireland_MN.SG
PN07.SG	M	Ireland_MN.SG	3460	3623-3371calBCE(4697±32BP,UBA-35065)	Ireland	53.0487	-9.14005	795320	PASS(literature)	Ireland_MN.SG
PN12.SG	M	Ireland_MN.SG	3433	3523-3341calBCE(4629±41BP,UBA-39198)	Ireland	53.0487	-9.14005	673264	PASS(literature)	Ireland_MN.SG
PN16.SG	F	Ireland_MN.SG	3492	3630-3374calBCE(4719±38BP,UBA-39202)	Ireland	53.0487	-9.14005	439893	PASS(literature)	Ireland_MN.SG
bally.SG	F	Ireland_N.SG	3181	3346-3014calBCE(4465±38BP,UBA-7059)	Ireland	54.5422	-5.95667	1150887	PASS(literature)	Ireland_N.SG		Neolithic_Europe_pooled
CAK534.SG	M	Ireland_N.SG	2850	3100-2600BCE	Ireland	54.0586	-8.38206	46508	PASS(literature)	Ireland_N.SG		Neolithic_Europe_pooled
I2534	F	Romania_IronGates_Mesolithic	5720	5810-5630calBCE(6829±47BP,PSUAMS-2334)	Romania	44.0272	25.3925	418429	PASS	Iron_Gates		WHG_pooled
I4582	F	Romania_IronGates_Mesolithic	6668	7026-6470calBCE(7812±69BP)[R_combineaftermarinecalibration:(8305±50BP,OxA-31598);(8300±40BP,PSUAMS-1749);(8335±45BP,PSUAMS-1904)]	Romania	44.517	22.722	930179	PASS	Iron_Gates		WHG_pooled
I5408	M	Romania_IronGates_Mesolithic	6754	7022-6485calBCE(8277±34BP,MAMS-28615)	Romania	44.517	22.722	528139	PASS	Iron_Gates		WHG_pooled
I5411	M	Romania_IronGates_Mesolithic	6650	7000-6300BCE	Romania	44.6261	22.6058	716414	PASS	Iron_Gates		WHG_pooled
I4660	F	Serbia_IronGates_Mesolithic	7763	7940-7585calBCE(8676±58BP,PSUAMS-2296)	Serbia	44.5337	22.0503	77342	PASS(mtmatchmax=0.978-0.98)	Iron_Gates		WHG_pooled
I4870	M	Serbia_IronGates_Mesolithic	6790	7045-6535calBCE(7870±78BP,PSUAMS-2295)	Serbia	44.5337	22.0503	619637	PASS	Iron_Gates		WHG_pooled
I4871	F	Serbia_IronGates_Mesolithic	6500	7100-5900BCE	Serbia	44.5337	22.0503	507099	PASS(mtcontam=[0.945,0.963])	Iron_Gates		WHG_pooled
I4872	F	Serbia_IronGates_Mesolithic	6500	7100-5900BCE	Serbia	44.5337	22.0503	335500	PASS	Iron_Gates		WHG_pooled
I4873	F	Serbia_IronGates_Mesolithic	5917	6012-5806calBCE(7035±40BP,OxA-16544)	Serbia	44.5337	22.0503	803852	PASS	Iron_Gates		WHG_pooled
I4874	F	Serbia_IronGates_Mesolithic	6549	6640-6471calBCE(7725±40BP,OxA-20702)	Serbia	44.5337	22.0503	801500	PASS	Iron_Gates		WHG_pooled
I4875	F	Serbia_IronGates_Mesolithic	6508	6615-6400calBCE(7643±63BP,PSUAMS-2380)	Serbia	44.5337	22.0503	815491	PASS	Iron_Gates		WHG_pooled
I4876	F	Serbia_IronGates_Mesolithic	6505	6635-6375calBCE(7625±71BP,PSUAMS-2381)	Serbia	44.5337	22.0503	802136	PASS	Iron_Gates		WHG_pooled
I4877	F	Serbia_IronGates_Mesolithic	6555	6645-6465calBCE(7728±51BP,PSUAMS-2382)	Serbia	44.5337	22.0503	817983	PASS	Iron_Gates		WHG_pooled
I4878	M	Serbia_IronGates_Mesolithic	5853	5995-5710calBCE(6955±76BP,PSUAMS-2383)	Serbia	44.5337	22.0503	816301	PASS	Iron_Gates		WHG_pooled
I4880	M	Serbia_IronGates_Mesolithic	5863	6000-5725calBCE(6979±75BP,PSUAMS-2384)	Serbia	44.5337	22.0503	827165	PASS	Iron_Gates		WHG_pooled
I4915	M	Serbia_IronGates_Mesolithic	6165	6340-5990calBCE(7260±76BP,PSUAMS-2360)	Serbia	44.6403	22.3033	834938	PASS	Iron_Gates		WHG_pooled
I4916	M	Serbia_IronGates_Mesolithic	6813	7035-6590calBCE(7874±72BP,PSUAMS-2369)	Serbia	44.6403	22.3033	804977	PASS(mtcontam=[0.959,0.977])	Iron_Gates		WHG_pooled
I4917	F	Serbia_IronGates_Mesolithic	6108	6220-5995calBCE(7209±57BP,PSUAMS-2374)	Serbia	44.6403	22.3033	789618	PASS(mtcontam=[0.957,0.973])	Iron_Gates		WHG_pooled
I5233	F	Serbia_IronGates_Mesolithic	6051	6224-5878calBCE(7158±85BP,AA-57770)	Serbia	44.5959	22.0106	824280	PASS	Iron_Gates		WHG_pooled
I5234	F	Serbia_IronGates_Mesolithic	7550	9300-5800BCE	Serbia	44.5959	22.0106	708929	PASS	Iron_Gates		WHG_pooled
I5235	M	Serbia_IronGates_Mesolithic	8885	9221-8548calBCE(9480±110BP,AA-57771)	Serbia	44.5959	22.0106	838984	PASS	Iron_Gates		WHG_pooled
I5236	M	Serbia_IronGates_Mesolithic	8088	8291-7826calBCE(8943±77BP,BM-1146)	Serbia	44.5959	22.0106	840166	PASS	Iron_Gates		WHG_pooled
I5237	M	Serbia_IronGates_Mesolithic	7550	9300-5800BCE	Serbia	44.5959	22.0106	842513	PASS(Xcontam=[0.005,0.017])	Iron_Gates		WHG_pooled
I5238	F	Serbia_IronGates_Mesolithic	8043	8265-7820calBCE(8907±66BP,PSUAMS-2407)	Serbia	44.5959	22.0106	823422	PASS	Iron_Gates		WHG_pooled
I5239	F	Serbia_IronGates_Mesolithic	8383	8535-8230calBCE(9105±62BP,PSUAMS-2375)	Serbia	44.5959	22.0106	809534	PASS	Iron_Gates		WHG_pooled
I5240	M	Serbia_IronGates_Mesolithic	8855	9140-8570calBCE(9469±70BP,PSUAMS-2377)	Serbia	44.5959	22.0106	826331	PASS	Iron_Gates		WHG_pooled
I5242	F	Serbia_IronGates_Mesolithic	8580	8805-8355calBCE(9363±64BP,PSUAMS-2408)	Serbia	44.5959	22.0106	836819	PASS	Iron_Gates		WHG_pooled
I5244	F	Serbia_IronGates_Mesolithic	8835	9115-8555calBCE(9424±55BP,PSUAMS-2376)	Serbia	44.5959	22.0106	809448	PASS	Iron_Gates		WHG_pooled
I5401	M	Serbia_IronGates_Mesolithic	6888	7076-6699calBCE(8016±58BP,OxA-13613)	Serbia	44.6403	22.3033	469437	PASS	Iron_Gates		WHG_pooled
I5402	M	Serbia_IronGates_Mesolithic	6206	6361-6050calBCE(7315±63BP,OxA-16942)	Serbia	44.6403	22.3033	823880	PASS	Iron_Gates		WHG_pooled
I5407	F	Serbia_IronGates_Mesolithic	6050	6300-5800BCE	Serbia	44.5529	22.0276	850240	PASS	Iron_Gates		WHG_pooled
I5771	M	Serbia_IronGates_Mesolithic	6375	6500-6250BCE	Serbia	44.5337	22.0503	231969	PASS	Iron_Gates		WHG_pooled
I5772	M	Serbia_IronGates_Mesolithic	6500	7100-5900BCE	Serbia	44.5337	22.0503	446446	PASS	Iron_Gates		WHG_pooled
R22.SG	F	Italy_C_BA.SG	1918	2015-1826calBCE(3570±20BP,UCIAMS-198885)	Italy	40.8101	8.44221	643408	PASS(literature)	Italy_C_BA.SG		Neolithic_Europe_pooled
R27.SG	M	Italy_C_BA.SG	2200	3500-900BCE	Italy	40.8101	8.44221	614784	PASS(literature)	Italy_C_BA.SG		Neolithic_Europe_pooled
R29.SG	M	Italy_C_BA.SG	2200	3500-900BCE	Italy	40.8101	8.44221	530891	PASS(literature)	Italy_C_BA.SG		Neolithic_Europe_pooled
R1014.SG	M	Italy_C.SG	5124	5214-5044calBCE(6180±25BP,UCIAMS-213631)	Italy	41.367	13.2914	578736	PASS(literature)	Italy_C.SG		Neolithic_Europe_pooled
R4.SG	M	Italy_C.SG	2891	2906-2880calBCE(4260±15BP,UCIAMS-198576)	Italy	41.96	13.54	1145669	PASS(literature)	Italy_C.SG		Neolithic_Europe_pooled
R5.SG	F	Italy_C.SG	2882	2905-2786calBCE(4245±15BP,UCIAMS-198577)	Italy	41.96	13.54	928940	PASS(literature)	Italy_C.SG		Neolithic_Europe_pooled
R11.SG	M	Italy_Mesolithic.SG	9918	9999-9801calBCE(10200±30BP,UCIAMS-198583)	Italy	41.96	13.54	750119	PASS(literature)	Italy_Mesolithic.SG
R15.SG	M	Italy_Mesolithic.SG	7136	7312-7062calBCE(8155±20BP,UCIAMS-198584)	Italy	41.96	13.54	1126562	PASS(literature)	Italy_Mesolithic.SG
R7.SG	M	Italy_Mesolithic.SG	8756	9107-8634calBCE(9465±25BP,UCIAMS-198579)	Italy	41.96	13.54	1129613	PASS(literature)	Italy_Mesolithic.SG
R10.SG	F	Italy_N.SG	5678	5721-5634calBCE(6780±20BP,UCIAMS-198582)	Italy	41.96	13.54	875305	PASS(literature)	Italy_N.SG		Neolithic_Europe_pooled
R16.SG	F	Italy_N.SG	5252	5309-5126calBCE(6255±20BP,UCIAMS-198585)	Italy	43.7224	13.0339	506075	PASS(literature)	Italy_N.SG		Neolithic_Europe_pooled
R17.SG	M	Italy_N.SG	5266	5323-5216calBCE(6310±20BP,UCIAMS-198883)	Italy	43.7224	13.0339	534016	PASS(literature)	Italy_N.SG		Neolithic_Europe_pooled
R18.SG	F	Italy_N.SG	5321	5461-5221calBCE(6355±25BP,UCIAMS-198884)	Italy	43.7224	13.0339	557331	PASS(literature)	Italy_N.SG		Neolithic_Europe_pooled
R2.SG	F	Italy_N.SG	6031	6068-5993calBCE(7165±20BP,UCIAMS-198574)	Italy	41.96	13.54	1119222	PASS(literature)	Italy_N.SG		Neolithic_Europe_pooled
R3.SG	F	Italy_N.SG	5766	5831-5723calBCE(6890±20BP,UCIAMS-198575)	Italy	41.96	13.54	1126622	PASS(literature)	Italy_N.SG		Neolithic_Europe_pooled
R8.SG	F	Italy_N.SG	5758	5830-5718calBCE(6880±20BP,UCIAMS-198580)	Italy	41.96	13.54	504952	PASS(literature)	Italy_N.SG		Neolithic_Europe_pooled
R9.SG	M	Italy_N.SG	5531	5611-5479calBCE(6585±20BP,UCIAMS-198581)	Italy	41.96	13.54	1153527	PASS(literature)	Italy_N.SG		Neolithic_Europe_pooled
I1979	F	Italy_North_BellBeaker_1	2065	2200-1930BCE	Italy	44.8	10.3333	375725	PASS	Italy_North_BellBeaker
I2477	F	Italy_North_BellBeaker_2	2065	2200-1930BCE	Italy	44.8	10.3333	782739	PASS	Italy_North_BellBeaker
I2478	M	Italy_North_BellBeaker_3	2056	2196-1939calBCE(3671±40BP,LTL-5035A)	Italy	44.78	10.29	622069	PASS(mtcontam=[0.96,0.974])	Italy_North_BellBeaker
RISE487.SG	M	Italy_North_Remedello_C.SG	3257	3485-3103calBCE(4557±28BP,OxA-X-2621)	Italy	45.26	10.379	233950	PASS(literature)	Italy_North_Remedello_C.SG		Neolithic_Europe_pooled
RISE486.SG	M	Italy_North_Remedello_EBA.SG	1952	2136-1771calBCE(3595±55BP,ETH-12913)	Italy	45.26	10.379	199113	PASS(literature)	Italy_North_Remedello_EBA.SG
ORC001	F	Italy_Sardinia_BA_Nuragic	1213	1368-1123calBCE(2987±23BP,MAMS-38280)	Italy	39.6672	9.42611	784034	PASS(literature)	Italy_Sardinia_BA_Nuragic
ORC003	M	Italy_Sardinia_BA_Nuragic	1231	1374-1126calBCE(2996±24BP,MAMS-38282)	Italy	39.6672	9.42611	846534	PASS	Italy_Sardinia_BA_Nuragic
ORC004	M	Italy_Sardinia_BA_Nuragic	1276	1386-1135calBCE(3020±23BP,MAMS-38283)	Italy	39.6672	9.42611	497759	PASS(literature)	Italy_Sardinia_BA_Nuragic
ORC005	F	Italy_Sardinia_BA_Nuragic	1190	1261-1124calBCE(2974±17BP,MAMS-38284)	Italy	39.6672	9.42611	805914	PASS(literature)	Italy_Sardinia_BA_Nuragic
ORC006	M	Italy_Sardinia_BA_Nuragic	1173	1263-1057calBCE(2961±23BP,MAMS-38285)	Italy	39.6672	9.42611	786743	PASS	Italy_Sardinia_BA_Nuragic
ORC007	M	Italy_Sardinia_BA_Nuragic	1223	1371-1125calBCE(2992±23BP,MAMS-38286)	Italy	39.6672	9.42611	843047	PASS	Italy_Sardinia_BA_Nuragic
ORC008	M	Italy_Sardinia_BA_Nuragic	1073	1198-991calBCE(2890±24BP,MAMS-38287)	Italy	39.6672	9.42611	821009	PASS(literature)	Italy_Sardinia_BA_Nuragic
ORC009	F	Italy_Sardinia_BA_Nuragic	1112	1211-1016calBCE(2917±24BP,MAMS-38288)	Italy	39.6672	9.42611	822916	PASS(literature)	Italy_Sardinia_BA_Nuragic
SUA003	M	Italy_Sardinia_BA_Nuragic	1162	1260-1054calBCE(2953±27BP,MAMS-28656)	Italy	39.87	9.2356	191401	PASS(literature)	Italy_Sardinia_BA_Nuragic
SUA006	F	Italy_Sardinia_BA_Nuragic	1178	1265-1112calBCE(2965±21BP,MAMS-39539)	Italy	39.87	9.2356	332445	PASS(literature)	Italy_Sardinia_BA_Nuragic
FIL004	F	Italy_Sardinia_C	3205	3338-3029calBCE(4472±25BP,MAMS-38276)	Italy	40.2781	8.76917	118115	PASS(literature)	Italy_Sardinia_C
I15941	M	Italy_Sardinia_C	2246	2343-2144calBCE(3810±25BP,PSUAMS-6693)	Italy	40.6267	8.32306	732994	PASS(mtcontam=[0.939,0.972])	Italy_Sardinia_C
I15942	M	Italy_Sardinia_C	2347	2459-2209calBCE(3865±25BP,PSUAMS-6694)	Italy	40.6267	8.32306	579426	PASS(Xcontam=[0.008,0.023])	Italy_Sardinia_C
I16164	M	Italy_Sardinia_C	2465	2571-2343calBCE(3955±30BP,PSUAMS-6695)	Italy	40.4106	8.63972	494513	PASS(damage.ss.half=0.096)	Italy_Sardinia_C
I16169	F	Italy_Sardinia_C	2227	2334-2140calBCE(3795±25BP,PSUAMS-6934)	Italy	40.6267	8.32306	441615	PASS	Italy_Sardinia_C
SID006	M	Italy_Sardinia_C	2713	2866-2577calBCE(4117±28BP,MAMS-39533)	Italy	40.624	8.63669	118397	PASS(literature)	Italy_Sardinia_C
I14675	M	Italy_Sardinia_C_MonteClaro	2071	2191-1973calBCE(3680±25BP,PSUAMS-6689)	Italy	40.7897	8.59139	798110	PASS	Italy_Sardinia_C_MonteClaro
I14677	M	Italy_Sardinia_C_MonteClaro	2379	2464-2294calBCE(3890±25BP,PSUAMS-6691)	Italy	40.7897	8.59139	795681	PASS	Italy_Sardinia_C_MonteClaro
I14678	M	Italy_Sardinia_C_MonteClaro	2297	2454-2201calBCE(3840±25BP,PSUAMS-6692)	Italy	40.7897	8.59139	817303	PASS	Italy_Sardinia_C_MonteClaro
I14676_published	M	Italy_Sardinia_C_MonteClaro_published	2103	2200-2030calBCE(3715±25BP,PSUAMS-6690)	Italy	40.7897	8.59139	817559	PASS	Italy_Sardinia_C_MonteClaro_published
I3743	M	Italy_Sardinia_EBA	2035	2136-1946calBCE(3655±25BP,PSUAMS-2076)	Italy	39.8666	9.23335	771199	PASS	Italy_Sardinia_EBA
ISB001	M	Italy_Sardinia_EBA	1785	1882-1690calBCE(3460±29BP,MAMS-28658)	Italy	39.87	9.2356	801484	PASS	Italy_Sardinia_EBA
LON001	F	Italy_Sardinia_EBA	1825	1921-1746calBCE(3509±28BP,MAMS-28657)	Italy	39.87	9.2356	752924	PASS(literature)	Italy_Sardinia_EBA
PJU002	F	Italy_Sardinia_EBA	2195	2292-2051calBCE(3774±29BP,MAMS-39528)	Italy	40.0667	8.60056	144729	PASS(literature)	Italy_Sardinia_EBA
S1249	M	Italy_Sardinia_EBA	1700	1800-1600BCE	Italy	39.8667	9.23333	108514	PASS(literature)	Italy_Sardinia_EBA
S1250	M	Italy_Sardinia_EBA	1700	1800-1600BCE	Italy	39.8667	9.23333	43116	PASS(literature)	Italy_Sardinia_EBA
S1252	M	Italy_Sardinia_EBA	1700	1800-1600BCE	Italy	39.8667	9.23333	370319	PASS(literature)	Italy_Sardinia_EBA
S1253	M	Italy_Sardinia_EBA	1700	1800-1600BCE	Italy	39.8667	9.23333	33521	PASS(literature)	Italy_Sardinia_EBA
SUA002	M	Italy_Sardinia_EBA	2126	2274-2032calBCE(3732±30BP,MAMS-28655)	Italy	39.87	9.2356	701703	PASS	Italy_Sardinia_EBA
SUA005	F	Italy_Sardinia_EBA	2220	2292-2141calBCE(3790±22BP,MAMS-39538)	Italy	39.87	9.2356	37869	PASS(literature)	Italy_Sardinia_EBA
SUA007	M	Italy_Sardinia_EBA	1954	2026-1888calBCE(3597±22BP,MAMS-39540)	Italy	39.87	9.2356	223470	PASS(literature)	Italy_Sardinia_EBA
SUC001	F	Italy_Sardinia_EBA	2070	2141-1975calBCE(3677±21BP,MAMS-38294)	Italy	40.8103	8.44418	743884	PASS(literature)	Italy_Sardinia_EBA
SUC003	M	Italy_Sardinia_EBA	2013	2131-1941calBCE(3643±20BP,MAMS-38296)	Italy	40.8103	8.44418	741940	PASS	Italy_Sardinia_EBA
SUC004	F	Italy_Sardinia_EBA	2235	2296-2144calBCE(3802±19BP,MAMS-38297)	Italy	40.8103	8.44418	774813	PASS(literature)	Italy_Sardinia_EBA
SUC005	M	Italy_Sardinia_EBA	2196	2288-2136calBCE(3774±20BP,MAMS-38298)	Italy	40.8103	8.44418	791969	PASS	Italy_Sardinia_EBA
SUC006	M	Italy_Sardinia_EBA	2397	2468-2306calBCE(3909±19BP,MAMS-38299)	Italy	40.8103	8.44418	623168	PASS(literature)	Italy_Sardinia_EBA
SUC007	M	Italy_Sardinia_EBA	2371	2462-2290calBCE(3880±22BP,MAMS-38300)	Italy	40.8103	8.44418	715979	PASS	Italy_Sardinia_EBA
SUC009	M	Italy_Sardinia_EBA	1717	1867-1631calBCE(3421±20BP,MAMS-38302)	Italy	40.8103	8.44418	768042	PASS	Italy_Sardinia_EBA
ISC001	M	Italy_Sardinia_EBA_Nuragic	2225	2297-2139calBCE(3794±25BP,MAMS-38277)	Italy	40.6634	8.53865	838421	PASS	Italy_Sardinia_EBA_Nuragic
I16163	F	Italy_Sardinia_IA_2	626	757-423calBCE(2465±20BP,PSUAMS-6682)	Italy	40.6267	8.32306	557631	PASS	Italy_Sardinia_IA_2
SEC001	M	Italy_Sardinia_LateC	2287	2452-2200calBCE(3835±25BP,MAMS-38289)	Italy	40.7862	8.59581	846588	PASS	Italy_Sardinia_LateC
SEC002	M	Italy_Sardinia_LateC	2402	2470-2306calBCE(3917±19BP,MAMS-38290)	Italy	40.7862	8.59581	921909	PASS(literature)	Italy_Sardinia_LateC
SEC004	F	Italy_Sardinia_LateC	2387	2463-2299calBCE(3894±19BP,MAMS-38291)	Italy	40.7862	8.59581	623082	PASS(literature)	Italy_Sardinia_LateC
SEC005	F	Italy_Sardinia_LateC	2398	2469-2306calBCE(3912±20BP,MAMS-38292)	Italy	40.7862	8.59581	816153	PASS(literature)	Italy_Sardinia_LateC
SEC006	F	Italy_Sardinia_LateC	2381	2461-2297calBCE(3888±19BP,MAMS-38293)	Italy	40.7862	8.59581	783537	PASS(literature)	Italy_Sardinia_LateC
I10364	M	Italy_Sardinia_LBA	973	1150-800BCE	Italy	40.55	8.31	665860	PASS	Italy_Sardinia_LBA
I10552	F	Italy_Sardinia_LBA	1284	1386-1212calBCE(3025±20BP,PSUAMS-4875)	Italy	39.6833	9.43333	833541	PASS	Italy_Sardinia_LBA
I10553	M	Italy_Sardinia_LBA	1160	1255-1055calBCE(2950±20BP,PSUAMS-4876)	Italy	39.6833	9.43333	812020	PASS	Italy_Sardinia_LBA
I10554	F	Italy_Sardinia_LBA	1172	1261-1059calBCE(2960±20BP,PSUAMS-4877)	Italy	39.6833	9.43333	793270	PASS	Italy_Sardinia_LBA
I3642	M	Italy_Sardinia_LBA	1044	1121-936calBCE(2870±20BP,PSUAMS-2387)	Italy	40.5467	8.32156	121351	PASS(damage.ds.half=0.042,mtcontam=[0.955,0.969])	Italy_Sardinia_LBA
I3741	F	Italy_Sardinia_LBA	1138	1221-1021calBCE(2935±25BP,PSUAMS-2118)	Italy	39.6833	9.43333	702441	PASS	Italy_Sardinia_LBA
I10502_published	M	Italy_Sardinia_LBA_published	1201	1369-1117calBCE(2980±25BP,PSUAMS-6688)	Italy	39.8509	9.37724	42589	PASS	Italy_Sardinia_LBA
I16161	F	Italy_Sardinia_MBA	1484	1534-1438calBCE(3230±25BP,PSUAMS-6681)	Italy	40.6267	8.32306	698398	PASS	Italy_Sardinia_MBA
I16170	M	Italy_Sardinia_MBA	1387	1491-1301calBCE(3125±25BP,PSUAMS-6696)	Italy	40.6267	8.32306	569841	PASS(mtcontam=[0.93,0.966])	Italy_Sardinia_MBA
I15943	F	Italy_Sardinia_N	3773	3936-3657calBCE(4995±25BP,PSUAMS-6932)	Italy	40.6267	8.32306	135240	PASS	Italy_Sardinia_N		Neolithic_Europe_pooled
I15945	F	Italy_Sardinia_N	3875	3967-3798calBCE(5095±30BP,PSUAMS-6936)	Italy	40.6267	8.32306	173534	PASS	Italy_Sardinia_N		Neolithic_Europe_pooled
I15946	M	Italy_Sardinia_N	4018	4158-3958calBCE(5205±30BP,PSUAMS-6699)	Italy	40.6267	8.32306	464563	PASS	Italy_Sardinia_N		Neolithic_Europe_pooled
I16165	F	Italy_Sardinia_N	3721	3787-3652calBCE(4960±25BP,PSUAMS-6924)	Italy	40.4106	8.63972	514515	PASS	Italy_Sardinia_N		Neolithic_Europe_pooled
I16166	M	Italy_Sardinia_N	3796	3941-3658calBCE(5005±25BP,PSUAMS-6925)	Italy	40.4106	8.63972	122036	PASS	Italy_Sardinia_N		Neolithic_Europe_pooled
I16168	M	Italy_Sardinia_N	3857	3949-3714calBCE(5035±25BP,PSUAMS-6926)	Italy	40.6267	8.32306	423015	PASS(mtcontam=[0.949,0.973])	Italy_Sardinia_N		Neolithic_Europe_pooled
I16183	F	Italy_Sardinia_N	3214	3346-3098calBCE(4500±25BP,PSUAMS-6935)	Italy	40.6267	8.32306	177431	PASS	Italy_Sardinia_N		Neolithic_Europe_pooled
LON003	M	Italy_Sardinia_N	4324	4442-4252calBCE(5481±32BP,MAMS-39524)	Italy	39.87	9.2356	395464	PASS(literature)	Italy_Sardinia_N		Neolithic_Europe_pooled
NOE001	M	Italy_Sardinia_N	4140	4246-4001calBCE(5307±32BP,MAMS-39526)	Italy	40.6661	8.59315	39975	PASS(literature)	Italy_Sardinia_N		Neolithic_Europe_pooled
NOE002	M	Italy_Sardinia_N	4182	4325-4053calBCE(5352±32BP,MAMS-39527)	Italy	40.6661	8.59315	64255	PASS(literature)	Italy_Sardinia_N		Neolithic_Europe_pooled
SID005	M	Italy_Sardinia_N	4145	4310-4047calBCE(5316±31BP,MAMS-39532)	Italy	40.624	8.63669	122495	PASS(literature)	Italy_Sardinia_N		Neolithic_Europe_pooled
SUC008	F	Italy_Sardinia_N	3867	3947-3779calBCE(5042±21BP,MAMS-38301)	Italy	40.8103	8.44418	783436	PASS(literature)	Italy_Sardinia_N		Neolithic_Europe_pooled
I4936_published	F	Italy_Sicily_BellBeaker_published	2200	2500-1900BCE	Italy	37.735	12.9619	23600	PASS	Italy_Sicily_BellBeaker_published
I11442	M	Italy_Sicily_EBA	2170	2276-2060BCE(3758±15BP)[R_combine:(3750±20BP,PSUAMS-4547);(3765±20BP,PSUAMS-4620)]	Italy	37.908	13.478	751906	PASS	Italy_Sicily_EBA
I3122	F	Italy_Sicily_EBA	2123	2272-2032calBCE(3730±30BP,PSUAMS-1985)	Italy	37.908	13.478	883315	PASS	Italy_Sicily_EBA
I3123	M	Italy_Sicily_EBA	2171	2287-2041calBCE(3760±30BP,PSUAMS-3892)	Italy	37.908	13.478	898425	PASS	Italy_Sicily_EBA
I3124	M	Italy_Sicily_EBA	1874	1949-1774calBCE(3545±20BP,PSUAMS-4317)	Italy	37.908	13.478	896134	PASS	Italy_Sicily_EBA
I7774_d	F	Italy_Sicily_EBA	1925	2200-1650BCE	Italy	36.8831	14.5712	23687	PASS	Italy_Sicily_EBA
I7796	M	Italy_Sicily_EBA	1781	1880-1689calBCE(3455±25BP,PSUAMS-6465)	Italy	36.8831	14.5712	162478	PASS	Italy_Sicily_EBA
I7800	F	Italy_Sicily_EBA	1995	2127-1900calBCE(3630±25BP,PSUAMS-6466)	Italy	36.8831	14.5712	46095	PASS(mtcontam=[0.932,0.96])	Italy_Sicily_EBA
I7805	F	Italy_Sicily_EBA	1910	2017-1778calBCE(3565±25BP,PSUAMS-6467)	Italy	36.8831	14.5712	53518	PASS(mtcontam=[0.91,0.977])	Italy_Sicily_EBA
I7807	F	Italy_Sicily_EBA	2088	2195-2027calBCE(3700±20BP,PSUAMS-6468)	Italy	36.8831	14.5712	182892	PASS	Italy_Sicily_EBA
I10371	F	Italy_Sicily_LBA	1150	1400-900BCE	Italy	37.68	12.789	36983	PASS(batch.flag)	Italy_Sicily_LBA
I10372	F	Italy_Sicily_LBA	1248	1377-1130calBCE(3005±20BP,PSUAMS-5891)	Italy	37.68	12.789	778202	PASS(batch.flag)	Italy_Sicily_LBA
I3876	M	Italy_Sicily_LBA	978	1107-901calBCE(2825±30BP,PSUAMS-1986)	Italy	37.68	12.789	756867	PASS	Italy_Sicily_LBA
I3878	F	Italy_Sicily_LBA	1266	1382-1134calBCE(3015±20BP,PSUAMS-3995)	Italy	37.68	12.789	836718	PASS	Italy_Sicily_LBA
I4062	F	Italy_Sicily_MN	4865	4984-4784calBCE(5980±30BP,PSUAMS-1950)	Italy	37.724	12.916	912717	PASS	Italy_Sicily_MN
I4063	F	Italy_Sicily_MN	4882	4987-4794calBCE(5995±30BP,PSUAMS-2263)	Italy	37.724	12.916	1038409	PASS	Italy_Sicily_MN
I4064	M	Italy_Sicily_MN	4768	4841-4711calBCE(5900±30BP,PSUAMS-2266)	Italy	37.724	12.916	786261	PASS(batch.flag)	Italy_Sicily_MN
I4065	F	Italy_Sicily_MN	4865	4988-4735calBCE(5980±35BP,PSUAMS-1951)	Italy	37.724	12.916	895042	PASS	Italy_Sicily_MN
DA231.SG	F	Kazakhstan_Andronovo.SG	1489	1610-1416calBCE(3225±43BP,UBA-33602)	Kazakhstan	52.4908	76.8394	390029	PASS(literature)	Kazakhstan_Andronovo.SG
Damgaard2018Yamnaya.SG	M	Kazakhstan_EBA_Yamnaya.SG	2940	3016-2885calBCE(4315±34BP,UBA-32667)	Kazakhstan	49.1342	75.8518	1182098	PASS(literature)	Kazakhstan_EBA_Yamnaya.SG		Pooled_early_Steppe_pastoralists
I11526	M	Kyrgyzstan_Aygirdjal_BA	2129	2204-2038calBCE(3735±20BP,PSUAMS-4607)	Kyrgyzstan	41.4315	75.8855	540241	PASS	Kyrgyzstan_Aygirdjal_BA		Iran_N_pooled
I11527	M	Kyrgyzstan_Aygirdjal_BA	1993	2122-1926calBCE(3630±20BP,PSUAMS-4750)	Kyrgyzstan	41.4315	75.8855	779712	PASS	Kyrgyzstan_Aygirdjal_BA		Iran_N_pooled
Kivutkalns153	M	Latvia_BA	683	796-549calBCE(2542±29BP,Hela-3744)	Latvia	56.852	24.272	250890	PASS(literature)	Latvia_BA
Kivutkalns164	M	Latvia_BA	473	719-393calBCE(2385±30BP,Hela-3739)	Latvia	56.852	24.272	96665	PASS(literature)	Latvia_BA
Kivutkalns194	M	Latvia_BA	348	407-228calBCE(2298±28BP,Hela-3737)	Latvia	56.852	24.272	134448	PASS(literature)	Latvia_BA
Kivutkalns19	M	Latvia_BA	483	720-401calBCE(2403±24BP,Hela-3746)	Latvia	56.852	24.272	928866	PASS(literature)	Latvia_BA
Kivutkalns207	F	Latvia_BA	650	787-541calBCE(2511±30BP,Hela-3743)	Latvia	56.852	24.272	926899	PASS(literature)	Latvia_BA
Kivutkalns209	M	Latvia_BA	660	804-516calBCE[unionoftwodates:778-516(2497±30BP,Hela-3741);804-551calBCE(2556±30BP,Hela-3742)]	Latvia	56.852	24.272	833675	PASS(literature)	Latvia_BA
Kivutkalns215	F	Latvia_BA	609	758-418calBCE(2462±27BP,Hela-3745)	Latvia	56.852	24.272	860087	PASS(literature)	Latvia_BA
Kivutkalns222	M	Latvia_BA	523	745-404calBCE(2423±26BP,Hela-3736)	Latvia	56.852	24.272	660810	PASS(literature)	Latvia_BA
Kivutkalns25	M	Latvia_BA	687	799-549calBCE(2545±30BP,Hela-3738)	Latvia	56.852	24.272	703010	PASS(literature)	Latvia_BA
Kivutkalns42	F	Latvia_BA	747	809-570calBCE(2573±30BP,Hela-3740)	Latvia	56.852	24.272	591185	PASS(literature)	Latvia_BA
I4432	M	Latvia_HG	6008	6072-5920calBCE(7140±40BP,PSUAMS-2230)	Latvia	56.2833	25.1333	746654	PASS	Latvia_HG
I4434	M	Latvia_HG	5491	5611-5382calBCE(6530±35BP,PSUAMS-2231)	Latvia	56.2833	25.1333	745524	PASS	Latvia_HG
I4438	M	Latvia_HG	5298	5375-5216calBCE(6335±35BP,PSUAMS-2235)	Latvia	56.2833	25.1333	757881	PASS	Latvia_HG
I4439	M	Latvia_HG	5696	5769-5628calBCE(6815±40BP,PSUAMS-2236)	Latvia	56.2833	25.1333	758805	PASS	Latvia_HG
I4440	M	Latvia_HG	5124	5216-5016calBCE(6180±30BP,PSUAMS-2264)	Latvia	56.2833	25.1333	735842	PASS	Latvia_HG
I4441	M	Latvia_HG	4768	4841-4711calBCE(5900±30BP,PSUAMS-2265)	Latvia	56.2833	25.1333	747334	PASS	Latvia_HG
I4550	M	Latvia_HG	6539	6633-6470calBCE(7715±25BP,PSUAMS-2835)	Latvia	56.2833	25.1333	777349	PASS	Latvia_HG
I4551	M	Latvia_HG	5720	5788-5663calBCE(6845±25BP,PSUAMS-2836)	Latvia	56.2833	25.1333	708525	PASS	Latvia_HG
I4552	F	Latvia_HG	5419	5477-5374calBCE(6460±25BP,PSUAMS-2837)	Latvia	56.2833	25.1333	744989	PASS	Latvia_HG
I4553	M	Latvia_HG	5420	5480-5375calBCE(6470±25BP,PSUAMS-2838)	Latvia	56.2833	25.1333	513811	PASS	Latvia_HG
I4595	F	Latvia_HG	5687	5729-5638calBCE(6800±25BP,PSUAMS-2683)	Latvia	56.2833	25.1333	784978	PASS	Latvia_HG
I4596	M	Latvia_HG	6020	6069-5984calBCE(7150±25BP,PSUAMS-2839)	Latvia	56.2833	25.1333	826812	PASS	Latvia_HG
I4626	M	Latvia_HG	5727	5838-5631calBCE(6840±55BP,Hela-1212)	Latvia	56.2833	25.1333	379869	PASS	Latvia_HG
I4628	M	Latvia_HG	5083	5304-4848calBCE(6145±80BP,Ua-19883)	Latvia	56.2833	25.1333	717447	PASS	Latvia_HG
I4630	M	Latvia_HG	7268	7471-7073calBCE(8240±70BP)	Latvia	56.2833	25.1333	765342	PASS	Latvia_HG
I4632	F	Latvia_HG	6366	6465-6242calBCE(7525±60BP,LuS-8220)	Latvia	56.2833	25.1333	785920	PASS	Latvia_HG
Latvia_HG2.SG	M	Latvia_HG.SG	5727	5838-5631calBCE(6840±55BP,Hela-1212)	Latvia	56.2833	25.1333	1132063	PASS(literature)	Latvia_HG.SG
I4629	F	Latvia_LN_CordedWare	2892	3091-2671calBCE(4280±60BP,Ua-19811)	Latvia	56.2833	25.1333	251797	PASS(mtcontam=[0.89,0.951])	Latvia_LN_CordedWare
Latvia_LN1.SG	F	Latvia_LN_CordedWare.SG	2892	3091-2671calBCE(4280±60BP,Ua-19811)	Latvia	56.2833	25.1333	205689	PASS(literature)	Latvia_LN_CordedWare.SG
I4437	F	Latvia_MN	4214	4330-4057calBCE(5370±30BP,PSUAMS-2234)	Latvia	56.2833	25.1333	732248	PASS	Latvia_MN		EHG_pooled
I4627	M	Latvia_MN	4121	4311-3978calBCE(5280±55BP,Ua-3639)	Latvia	56.2833	25.1333	686273	PASS	Latvia_MN		EHG_pooled
Latvia_MN2.SG	F	Latvia_MN_Comb_Ware.SG	4093	4387-3799calBCE[unionofthreedates:4230-3799calBCE(5180±65BP,Ua-19813);4387-3818calBCE(5290±105BP);4230-3799calBCE(5180±65BP)]	Latvia	56.2833	25.1333	758978	PASS(literature)	Latvia_MN_Comb_Ware.SG		EHG_pooled
I1069_published	M	Israel_Natufian_published	10750	12000-9500BCE	Israel	32.65	35.067	27137	PASS	Levant_HG
I1690_published	M	Israel_Natufian_published	10750	12000-9500BCE	Israel	32.65	35.067	29883	PASS	Levant_HG
I0867	M	Israel_PPNB	6750	7300-6200BCE	Israel	31.79	35.168	752549	PASS(Xcontam=0.015)	Levant_N
I1710	M	Jordan_PPNB	7615	7741-7522calBCE(8580±60BP,Poz-81098)	Jordan	31.988	35.976	127351	PASS	Levant_N
I1699	F	Jordan_PPNC	6750	6800-6700BCE	Jordan	31.988	35.976	292851	PASS(mtcontam=[0.958,0.976])	Levant_N
Turlojiske1932	F	Lithuania_BA	1086	1257-924calBCE(2895±55BP,OxA-5931)	Lithuania	54.362	23.333	82988	PASS(literature)	Lithuania_BA
Turlojiske1	M	Lithuania_BA	869	928-810calBCE(2730±30BP,Poz-66904)	Lithuania	54.362	23.333	129183	PASS(literature)	Lithuania_BA
Turlojiske3	M	Lithuania_BA	896	1015-797calBCE(2736±60BP,Vs-1188)	Lithuania	54.362	23.333	484441	PASS(literature)	Lithuania_BA
Turlojiske5	M	Lithuania_BA	1350	2100-600BCE	Lithuania	54.362	23.333	60338	PASS(literature)	Lithuania_BA
Donkalnis6	F	Lithuania_EMN_Narva	4619	4718-4503calBCE(5770±40BP,Poz-61574)	Lithuania	55.808	22.422	945839	PASS(literature)	Lithuania_EMN_Narva
Donkalnis7	M	Lithuania_EMN_Narva	5160	5374-4939calBCE(6220±90BP,Poz-61576)	Lithuania	55.808	22.422	467765	PASS(literature)	Lithuania_EMN_Narva
Kretuonas1	F	Lithuania_EMN_Narva	4173	4453-3818calBCE(5350±130BP,OxA-5935)	Lithuania	55.26	26.098	298198	PASS(literature)	Lithuania_EMN_Narva
Kretuonas2	M	Lithuania_EMN_Narva	4200	5500-2900BCE	Lithuania	55.26	26.098	653282	PASS(literature)	Lithuania_EMN_Narva
Kretuonas4	F	Lithuania_EMN_Narva	4200	5500-2900BCE	Lithuania	55.26	26.098	1006360	PASS(literature)	Lithuania_EMN_Narva
Spiginas1	M	Lithuania_EMN_Narva	4313	4442-4243calBCE(5470±40BP,Poz-61572)	Lithuania	55.768	22.417	998529	PASS(literature)	Lithuania_EMN_Narva
RISE598.SG	M	Lithuania_LBA.SG	703	906-477calBCE(2590±75BP,Ua-16681)	Lithuania	54.358	23.302	18404	PASS(literature)	Lithuania_LBA.SG
Gyvakarai1_10bp	M	Lithuania_LN	2545	2620-2470calBCE	Lithuania	55.918	24.913	1137323	PASS(literature)	Lithuania_LN
Plinkaigalis241	F	Lithuania_LN	2578	2861-2356calBCE(4030±55BP,OxA-5928)	Lithuania	55.41	23.647	191452	PASS(literature)	Lithuania_LN
Plinkaigalis242	F	Lithuania_LN	2892	3264-2625calBCE(4280±75BP,OxA-5936)	Lithuania	55.41	23.647	871731	PASS(literature)	Lithuania_LN
Donkalnis4	M	Lithuania_Mesolithic	5873	5991-5736calBCE(6995±65BP,OxA-5924)	Lithuania	55.808	24.422	22321	PASS(literature)	Lithuania_Mesolithic		WHG_pooled
Spiginas4	F	Lithuania_Mesolithic	6326	6442-6227calBCE(7470±60BP,Gin-5571)	Lithuania	55.768	22.417	670952	PASS(literature)	Lithuania_Mesolithic		WHG_pooled
I4070	M	Netherlands_BA	1753	1880-1627calBCE(3440±40BP,GrA-17225)	Netherlands	52.7336	5.09618	697834	PASS	Netherlands_BA
I4071	F	Netherlands_BA	1767	1883-1634calBCE(3450±40BP,GrA-17226)	Netherlands	52.7336	5.09618	774001	PASS	Netherlands_BA
I4068	M	Netherlands_BellBeaker	2035	2134-1950calBCE(3655±20BP,PSUAMS-2318)	Netherlands	52.7336	5.09618	469691	PASS	Netherlands_BellBeaker
I4069	M	Netherlands_BellBeaker	2016	2192-1887calBCE(3640±50BP,GrA-6477)	Netherlands	52.7336	5.09618	721500	PASS(mtcontam=[0.953,0.975])	Netherlands_BellBeaker
I4073	M	Netherlands_BellBeaker	2042	2197-1897calBCE(3660±50BP,GrA-15598)	Netherlands	52.7336	5.09618	761432	PASS	Netherlands_BellBeaker
I4074	M	Netherlands_BellBeaker	2080	2281-1899calBCE(3690±60BP,GrA-15597)	Netherlands	52.7336	5.09618	780740	PASS	Netherlands_BellBeaker
I4075	F	Netherlands_BellBeaker	2000	2127-1933calBCE(3635±20BP,PSUAMS-2337)	Netherlands	52.7336	5.09618	770037	PASS	Netherlands_BellBeaker
I4076	F	Netherlands_BellBeaker	1813	1883-1747calBCE(3490±20BP,PSUAMS-2319)	Netherlands	52.7336	5.09618	436123	PASS	Netherlands_BellBeaker
I5748	M	Netherlands_BellBeaker	2433	2579-2211calBCE(3945±55BP,GrN-6650C)	Netherlands	52.7336	5.09618	636009	PASS	Netherlands_BellBeaker
I5750	M	Netherlands_BellBeaker	2100	2600-1600BCE	Netherlands	52.7336	5.09618	641693	PASS	Netherlands_BellBeaker
I4067_published	F	Netherlands_BellBeaker_published	1820	1958-1646calBCE(3500±50BP,GrA-15602)	Netherlands	52.7336	5.09618	28937	PASS	Netherlands_BellBeaker_published
VK531.SG	M	Norway_LN_BA.SG	2397	2559-2290calBCE(3918±36BP,UBA-36964)	Norway	69.47	18	872318	PASS(literature)	Norway_LN_BA.SG
Hum1.SG	F	Norway_Mesolithic.SG	7414	7502-7325calBCE(8703±27BP)[R_combine:TRa-954,TUa-1257,TRa-952,TUa-2106,TRa-951,TRa-953,TUa-2107)]	Norway	58.064	7.7437	405551	PASS(literature)	Norway_Mesolithic.SG		EHG_pooled
Hum2.SG	M	Norway_Mesolithic.SG	7414	7502-7325calBCE(8703±27BP)[R_combine:TRa-954,TUa-1257,TRa-952,TUa-2106,TRa-951,TRa-953,TUa-2107)]	Norway	58.064	7.7437	1115169	PASS(literature)	Norway_Mesolithic.SG		EHG_pooled
Steigen.SG	M	Norway_N_HG.SG	3907	4000-3814calBCE	Norway	67.81	14.681	859653	PASS(literature)	Norway_N_HG.SG		EHG_pooled
I4253	M	Poland_BellBeaker	2316	2454-2205calBCE(3850±20BP,PSUAMS-2339)	Poland	50.649	20.656	452974	PASS(damage.ds.half=0.043)	Poland_BellBeaker
I6534	M	Poland_BellBeaker	2287	2455-2147calBCE(3830±35BP,Poz-75936)	Poland	50.09	18.1	72026	PASS	Poland_BellBeaker
I6538	F	Poland_BellBeaker	1873	2015-1751calBCE(3545±35BP,Poz-86950)	Poland	50.91	16.79	25860	PASS	Poland_BellBeaker
I6582	F	Poland_BellBeaker	2221	2395-2051calBCE(3790±35BP,Poz-75951)	Poland	50.09	18.1	791514	PASS	Poland_BellBeaker
I6583	F	Poland_BellBeaker	2188	2291-2047calBCE(3770±30BP,Poz-65207)	Poland	50.96	17.02	828828	PASS(mtcontam=[0.949,0.973])	Poland_BellBeaker
I4251_published	M	Poland_BellBeaker_published	2269	2437-2147calBCE(3825±25BP,PSUAMS-2321)	Poland	50.649	20.656	80714	PASS(literature)	Poland_BellBeaker_published
I4252_published	M	Poland_BellBeaker_published	2205	2287-2140calBCE(3780±20BP,PSUAMS-2338)	Poland	50.649	20.656	30131	PASS(literature)	Poland_BellBeaker_published
N25.SG	F	Poland_BKG.SG	4300	4600-4000BCE	Poland	52.61	18.8	1055361	PASS(literature)	Poland_BKG.SG
N26.SG	M	Poland_BKG.SG	4227	4335-4058calBCE(5380±35BP,Poz-77330)	Poland	50.67	21.38	1049737	PASS(literature)	Poland_BKG.SG
N27.SG	M	Poland_BKG.SG	4300	4600-4000BCE	Poland	52.61	18.8	1003248	PASS(literature)	Poland_BKG.SG
N28.SG	M	Poland_BKG.SG	4124	4251-3996calBCE	Poland	52.61	18.8	984960	PASS(literature)	Poland_BKG.SG
N31.SG	F	Poland_BKG.SG	4180	4327-4051calBCE(5350±40BP,Poz-77356)	Poland	52.61	18.8	969046	PASS(literature)	Poland_BKG.SG
N36.SG	F	Poland_BKG.SG	4300	4600-4000BCE	Poland	50.67	21.38	976414	PASS(literature)	Poland_BKG.SG
I6531	M	Poland_ChopiceVeseleCulture	2163	2288-2037calBCE(3755±35BP,Poz-86947)	Poland	50.23	18.22	793534	PASS	Poland_ChopiceVeseleCulture
I6537	M	Poland_ChopiceVeseleCulture	2180	2293-2039calBCE(3765±35BP,Poz-54136)	Poland	50.11	18.21	533101	PASS	Poland_ChopiceVeseleCulture
RISE431.SG	M	Poland_CordedWare_ProtoUnetice.SG	2175	2286-2044calBCE(3762±27BP,OxA-27967)	Poland	52.143	16.538	122135	PASS(literature)	Poland_CordedWare_ProtoUnetice.SG
N47.SG	M	Poland_CWC_1.SG	2425	2600-2250BCE	Poland	52.62	18.96	1074445	PASS(literature)	Poland_CWC.SG
N49.SG	M	Poland_CWC_1.SG	2425	2600-2250BCE	Poland	52.62	18.96	1045306	PASS(literature)	Poland_CWC.SG
N44.SG	F	Poland_CWC_3.SG	2450	2571-2305calBCE(3950±35BP,Poz-77329)	Poland	52.62	18.96	1017645	PASS(literature)	Poland_CWC.SG
N45.SG	F	Poland_CWC_3.SG	2425	2600-2250BCE	Poland	52.62	18.96	1050046	PASS(literature)	Poland_CWC.SG
RISE1.SG	M	Poland_CWC_3.SG	2713	2866-2577calBCE(4117±28BP,UBA-16633)	Poland	52.29	17.54	17097	PASS(literature)	Poland_CWC.SG
poz44.SG	F	Poland_CWC.SG	2713	2866-2577calBCE(4117±28BP,UBA-16633)	Poland	52.3	17.55	67336	PASS(literature)	Poland_CWC.SG
poz81.SG	M	Poland_CWC.SG	2752	2881-2627calBCE(4160±35BP,Poz-36250)	Poland	52.3	17.55	773809	PASS(literature)	Poland_CWC.SG
I6579	F	Poland_EBA	2205	2340-2042calBCE(3780±35BP,Poz-75954)	Poland	51.04	17.07	788610	PASS	Poland_EBA
RISE109.SG	F	Poland_EBA_Unetice.SG	1871	1959-1770calBCE(3544±26BP,UB-16557)	Poland	50.98	17.068	205999	PASS(literature)	Poland_EBA_Unetice.SG
RISE139.SG	M	Poland_EBA_Unetice.SG	2020	2137-1926calBCE(3645±33BP,Ua-44034)	Poland	50.796	17.094	26821	PASS(literature)	Poland_EBA_Unetice.SG
RISE145.SG	F	Poland_EBA_Unetice.SG	2065	2191-1956calBCE(3677±31BP,UB-16564)	Poland	50.913	17.177	27376	PASS(literature)	Poland_EBA_Unetice.SG
RISE150.SG	F	Poland_EBA_Unetice.SG	1794	1886-1691calBCE(3469±31BP,Ua-42401)	Poland	50.918	16.957	635649	PASS(literature)	Poland_EBA_Unetice.SG
RISE154.SG	F	Poland_EBA_Unetice.SG	1836	1930-1751calBCE(3522±24BP,Uba-16555)	Poland	50.948	16.943	165439	PASS(literature)	Poland_EBA_Unetice.SG
N17.SG	M	Poland_EBA.SG	1900	2020-1774calBCE(3560±30BP,Poz-77332)	Poland	52.66	18.88	1074631	PASS(literature)	Poland_EBA.SG
N38.SG	F	Poland_GAC.SG	3009	3307-2899calBCE(4380±40BP,Poz-77333)	Poland	52.61	18.9	1022642	PASS(literature)	Poland_GAC.SG
I2403	M	Poland_Globular_Amphora	2717	2868-2577calBCE(4120±30BP,Beta-430712)	Poland	52.85	17.8833	290049	PASS	Poland_Globular_Amphora		Neolithic_Europe_pooled
I2433	F	Poland_Globular_Amphora	3000	3100-2900BCE	Poland	52.85	17.8833	528330	PASS	Poland_Globular_Amphora		Neolithic_Europe_pooled
I2434	F	Poland_Globular_Amphora	3100	3400-2800BCE	Poland	52.85	17.8833	112399	PASS	Poland_Globular_Amphora		Neolithic_Europe_pooled
I2440	M	Poland_Globular_Amphora	3000	3100-2900BCE	Poland	52.85	17.8833	189493	PASS	Poland_Globular_Amphora		Neolithic_Europe_pooled
I2441	M	Poland_Globular_Amphora	3100	3400-2800BCE	Poland	52.85	17.8833	510373	PASS	Poland_Globular_Amphora		Neolithic_Europe_pooled
I2405_published	M	Poland_Globular_Amphora_published	3182	3337-3021calBCE(4460±30BP,Beta-430713)	Poland	52.85	17.8833	91505	PASS	Poland_Globular_Amphora_published
RISE1159.SG	F	Poland_Koszyce_GAC.SG	2774	2884-2671calBCE(4180±22BP)	Poland	48.7	21.2	1068129	PASS(literature)	Poland_Koszyce_GAC.SG		Neolithic_Europe_pooled
RISE1161.SG	F	Poland_Koszyce_GAC.SG	2835	2915-2698calBCE(4239±33BP)	Poland	48.7	21.2	813323	PASS(literature)	Poland_Koszyce_GAC.SG		Neolithic_Europe_pooled
RISE1163.SG	M	Poland_Koszyce_GAC.SG	2786	2891-2674calBCE(4196±25BP)	Poland	48.7	21.2	1147530	PASS(literature)	Poland_Koszyce_GAC.SG		Neolithic_Europe_pooled
RISE1165.SG	M	Poland_Koszyce_GAC.SG	2804	2906-2675calBCE(4220±34BP)	Poland	48.7	21.2	1025600	PASS(literature)	Poland_Koszyce_GAC.SG		Neolithic_Europe_pooled
RISE1166.SG	F	Poland_Koszyce_GAC.SG	2954	3072-2888calBCE(4330±34BP)	Poland	48.7	21.2	1079562	PASS(literature)	Poland_Koszyce_GAC.SG		Neolithic_Europe_pooled
RISE1170.SG	F	Poland_Koszyce_GAC.SG	2804	2900-2696calBCE(4213±26BP)	Poland	48.7	21.2	1112811	PASS(literature)	Poland_Koszyce_GAC.SG		Neolithic_Europe_pooled
RISE1246.SG	F	Poland_Ksiaznice_GAC.SG	2771	2895-2632calBCE(4190±40BP)	Poland	50.2	21.4	417705	PASS(literature)	Poland_Ksiaznice_GAC.SG		Neolithic_Europe_pooled
RISE1248.SG	F	Poland_Ksiaznice_GAC.SG	3275	2950-2600BCE	Poland	50.2	21.4	604561	PASS(literature)	Poland_Ksiaznice_GAC.SG		Neolithic_Europe_pooled
RISE1249.SG	F	Poland_Ksiaznice_GAC.SG	2787	2905-2636calBCE(4210±40BP)	Poland	50.2	21.4	710701	PASS(literature)	Poland_Ksiaznice_GAC.SG		Neolithic_Europe_pooled
RISE1252.SG	M	Poland_Mierzanowice_GAC.SG	2775	3100-2450BCE	Poland	50.8	21.5	386250	PASS(literature)	Poland_Mierzanowice_GAC.SG		Neolithic_Europe_pooled
RISE1241.SG	M	Poland_Sandomierz_GAC.SG	2823	2901-2701calBCE(4222±23BP)	Poland	50.6	21.7	654308	PASS(literature)	Poland_Sandomierz_GAC.SG		Neolithic_Europe_pooled
RISE1250.SG	M	Poland_Sandomierz_GAC.SG	2800	2950-2650BCE	Poland	50.6	21.7	433954	PASS(literature)	Poland_Sandomierz_GAC.SG		Neolithic_Europe_pooled
pcw260.SG	F	Poland_Southeast_BellBeaker.SG	2287	2455-2147calBCE(3830±35BP,Poz-34734)	Poland	50.3561	20.5714	728247	PASS	Poland_Southeast_BellBeaker.SG
pcw270.SG	F	Poland_Southeast_BellBeaker.SG	2300	2500-2100BCE	Poland	50.3561	20.5714	75556	PASS	Poland_Southeast_BellBeaker.SG
pcw280.SG	F	Poland_Southeast_BellBeaker.SG	2300	2500-2100BCE	Poland	50.3561	20.5714	247599	PASS	Poland_Southeast_BellBeaker.SG
pcw191.SG	F	Poland_Southeast_CordedWare_MC.SG	2287	2455-2147calBCE(3830±35BP,Poz-55335)	Poland	49.9336	22.8189	85583	PASS	Poland_Southeast_CordedWare_MC.SG
pcw040.SG	M	Poland_Southeast_CordedWare.SG	2450	2571-2305calBCE(3950±35BP,Poz-90777)	Poland	49.9161	22.8608	802299	PASS	Poland_Southeast_CordedWare.SG
pcw061.SG	F	Poland_Southeast_CordedWare.SG	2371	2469-2211calBCE(3890±35BP,Poz-90780)	Poland	49.9161	22.8608	243844	PASS	Poland_Southeast_CordedWare.SG
pcw070.SG	M	Poland_Southeast_CordedWare.SG	2371	2469-2211calBCE(3890±35BP,Poz-90875)	Poland	49.9161	22.8608	399274	PASS	Poland_Southeast_CordedWare.SG
pcw110.SG	M	Poland_Southeast_CordedWare.SG	2350	2500-2200BCE	Poland	50.0119	22.5942	39387	PASS	Poland_Southeast_CordedWare.SG
pcw160.SG	M	Poland_Southeast_CordedWare.SG	2349	2463-2208calBCE(3870±35BP,Poz-54043)	Poland	50.0444	22.5714	28469	PASS	Poland_Southeast_CordedWare.SG
pcw211.SG	F	Poland_Southeast_CordedWare.SG	2350	2500-2200BCE	Poland	49.9572	22.6603	326042	PASS	Poland_Southeast_CordedWare.SG
pcw212.SG	F	Poland_Southeast_CordedWare.SG	2510	2617-2351calBCE(3985±35BP,Poz-90881)	Poland	49.9572	22.6603	58246	PASS	Poland_Southeast_CordedWare.SG
pcw250.SG	M	Poland_Southeast_CordedWare.SG	2350	2500-2200BCE	Poland	50.1044	20.0114	59881	PASS	Poland_Southeast_CordedWare.SG
pcw350.SG	M	Poland_Southeast_CordedWare.SG	2343	2462-2206calBCE(3865±35BP,Poz-90898)	Poland	50.4561	23.6619	126034	PASS	Poland_Southeast_CordedWare.SG
pcw361.SG	M	Poland_Southeast_CordedWare.SG	2350	2500-2200BCE	Poland	50.4561	23.6619	823631	PASS	Poland_Southeast_CordedWare.SG
pcw362.SG	M	Poland_Southeast_CordedWare.SG	2355	2465-2209calBCE(3875±35BP,Poz-90899)	Poland	50.4561	23.6619	1019347	PASS	Poland_Southeast_CordedWare.SG
pcw420.SG	M	Poland_Southeast_CordedWare.SG	2350	2500-2200BCE	Poland	50.1853	20.2992	36306	PASS	Poland_Southeast_CordedWare.SG
pcw430.SG	M	Poland_Southeast_CordedWare.SG	2350	2500-2200BCE	Poland	50.1236	19.9931	78185	PASS	Poland_Southeast_CordedWare.SG
N18.SG	F	Poland_TRB.SG	3509	3632-3376calBCE(4730±35BP,Poz-71316)	Poland	52.62	18.96	974168	PASS(literature)	Poland_TRB.SG		Neolithic_Europe_pooled
N20.SG	M	Poland_TRB.SG	3517	3633-3377calBCE(4735±35BP,Poz-71315)	Poland	52.62	18.96	735974	PASS(literature)	Poland_TRB.SG		Neolithic_Europe_pooled
RISE1254.SG	M	Poland_Wilczyce_GAC.SG	2775	3100-2450BCE	Poland	51.1	17.1	397812	PASS(literature)	Poland_Wilczyce_GAC.SG
I0839	F	Portugal_C	2314	2456-2203calBCE(3847±29BP,OxA-28859)	Portugal	39.5	-8.61667	88798	PASS	Portugal_C		Neolithic_Europe_pooled
I0840	F	Portugal_C	2293	2454-2153calBCE(3836±29BP,OxA-28857)	Portugal	39.5	-8.61667	133290	PASS	Portugal_C		Neolithic_Europe_pooled
I11592	M	Portugal_C	2700	2800-2600BCE	Portugal	39.0833	9.26667	586451	PASS(batch.flag,Xcontam=[0.007,0.021])	Portugal_C		Neolithic_Europe_pooled
I11599	M	Portugal_C	3100	3350-2850BCE	Portugal	39.1108	-8.66358	440043	PASS	Portugal_C		Neolithic_Europe_pooled
I11601	F	Portugal_C	3100	3350-2850BCE	Portugal	39.1108	-8.66358	140275	PASS	Portugal_C		Neolithic_Europe_pooled
I11604	M	Portugal_C	2800	3100-2500BCE	Portugal	39.2333	-9.3	60874	PASS	Portugal_C		Neolithic_Europe_pooled
I11605	M	Portugal_C	2800	3100-2500BCE	Portugal	39.2333	-9.3	527631	PASS	Portugal_C		Neolithic_Europe_pooled
I11614	F	Portugal_C	2700	2800-2600BCE	Portugal	39.0833	9.26667	583737	PASS	Portugal_C		Neolithic_Europe_pooled
I1970	M	Portugal_C	2685	2876-2491calBCE(4100±60BP,GrN-10972)	Portugal	38.875	-9.075	206310	PASS	Portugal_C		Neolithic_Europe_pooled
I3432	F	Portugal_C	2974	3081-2907calBCE(4365±25BP,PSUAMS-1882)	Portugal	38.387	-7.55	558517	PASS	Portugal_C		Neolithic_Europe_pooled
I5076	F	Portugal_C	3196	3336-3026calBCE(4465±25BP,PSUAMS-3902)	Portugal	37.1968	-8.58855	806951	PASS	Portugal_C		Neolithic_Europe_pooled
I5428	M	Portugal_C	3215	3352-3101calBCE(4510±25BP,PSUAMS-8227)	Portugal	39.6241	-9.04719	407842	PASS	Portugal_C		Neolithic_Europe_pooled
I5429	M	Portugal_C	2916	3010-2886calBCE(4310±20BP,PSUAMS-2692)	Portugal	38.387	-7.55	899025	PASS	Portugal_C		Neolithic_Europe_pooled
I6601	M	Portugal_C	2700	2800-2600BCE	Portugal	39.09	-9.29	398824	PASS	Portugal_C		Neolithic_Europe_pooled
CabecoArruda117B.SG	M	Portugal_C.SG	3100	3350-2850BCE	Portugal	39.1108	-8.66358	388073	PASS(literature)	Portugal_C.SG
CabecoArruda122A.SG	M	Portugal_C.SG	3100	3350-2850BCE	Portugal	39.1108	-8.66358	966588	PASS(literature)	Portugal_C.SG
I7691	M	Portugal_EBA	1950	2200-1700BCE	Portugal	39.6686	-8.1303	83535	PASS	Portugal_EBA
I7692	F	Portugal_EBA	1950	2200-1700BCE	Portugal	39.6686	-8.1303	58448	PASS	Portugal_EBA
I7687	M	Portugal_LBA	950	1200-700BCE	Portugal	40.0869	-8.5166	27578	PASS	Portugal_LBA
I7688	F	Portugal_LBA	950	1200-700BCE	Portugal	40.0869	-8.5166	21027	PASS	Portugal_LBA
I4229	M	Portugal_LN_C	2208	2287-2141calBCE(3782±17BP)[R_combine:(3775±25BP,PSUAMS-1750);(3783±29BP,OxA-33490);(3790±30BP,OxA-33491)]	Portugal	38.745	-9.21522	875453	PASS	Portugal_LN_C
CovaMoura364.SG	M	Portugal_LN_C.SG	2250	2500-2000BCE	Portugal	38.745	-9.21522	666359	PASS(literature)	Portugal_LN_C.SG		Neolithic_Europe_pooled
CovaMoura9B.SG	F	Portugal_LN_C.SG	2250	2500-2000BCE	Portugal	38.745	-9.21522	1069564	PASS(literature)	Portugal_LN_C.SG		Neolithic_Europe_pooled
DolmenAnsiao96B.SG	M	Portugal_LN_C.SG	3500	3700-3300BCE	Portugal	39.9167	-8.43333	995212	PASS(literature)	Portugal_LN_C.SG		Neolithic_Europe_pooled
I8045	F	Portugal_MBA	1500	1700-1300BCE	Portugal	38.1988	-8.71	32990	PASS	Portugal_MBA
MonteGato104.SG	M	Portugal_MBA.SG	1596	1728-1520BCE(3334±26BP)[R_combine:(3260±50BP,Sac-2573);(3360±30BP,Beta-318379)]	Portugal	37.9447	-7.59889	739513	PASS(literature)	Portugal_MBA.SG
TV32032extra.SG	M	Portugal_MBA.SG	1600	1800-1400BCE	Portugal	37.199	-8.58798	664207	PASS(literature)	Portugal_MBA.SG
TV3831.SG	M	Portugal_MBA.SG	1600	1800-1400BCE	Portugal	37.199	-8.58798	725249	PASS(literature)	Portugal_MBA.SG
ValeOuro10207.SG	F	Portugal_MBA.SG	1600	1800-1400BCE	Portugal	38.05	-8.1	254645	PASS(literature)	Portugal_MBA.SG
LD270.SG	U	Portugal_MN.SG	2430	2566-2305calBCE(3940±30BP,Beta-441387)	Portugal	41.7083	-6.92778	855937	PASS(literature)	Portugal_MN.SG
LU339.SG	U	Portugal_MN.SG	2899	3008-2783calBCE(4280±30BP,Beta-441386)	Portugal	41.7083	-6.92778	1124350	PASS(literature)	Portugal_MN.SG
LugarCanto41.SG	F	Portugal_MN.SG	4000	4500-3500BCE	Portugal	39.414	-8.822	759210	PASS(literature)	Portugal_MN.SG
LugarCanto42.SG	F	Portugal_MN.SG	4000	4500-3500BCE	Portugal	39.414	-8.822	1089508	PASS(literature)	Portugal_MN.SG
LugarCanto44.SG	F	Portugal_MN.SG	4000	4500-3500BCE	Portugal	39.414	-8.822	998856	PASS(literature)	Portugal_MN.SG
LugarCanto45.SG	M	Portugal_MN.SG	4000	4500-3500BCE	Portugal	39.414	-8.822	87819	PASS(literature)	Portugal_MN.SG
I4081_published	M	Romania_IronGates_Mesolithic_published	7411	7581-7191calBCE(8369±73BP,OxA-31595)	Romania	44.517	22.722	311701	PASS	Romania_IronGates_Mesolithic_published
I4607	M	Romania_IronGates_Mesolithic_published	6977	7446-6643calBCE(8047±122BP,OxA-4380)	Romania	44.6261	22.6058	321541	PASS	Romania_IronGates_Mesolithic_published
I4655_published	M	Romania_IronGates_Mesolithic_published	6814	7059-6571calBCE(7904±93BP,OxA-8581)	Romania	44.6261	22.6058	59405	PASS(literature)	Romania_IronGates_Mesolithic_published
M95.SG	M	Romania_IronGates_Mesolithic.SG	6864	7125-6603calBCE(8380±80BP,OxA-8583)	Romania	44.6261	22.6058	733033	PASS(literature)	Romania_IronGates_Mesolithic.SG
M96.SG	M	Romania_IronGates_Mesolithic.SG	6875	7250-6500BCE	Romania	44.6261	22.6058	1075084	PASS(literature)	Romania_IronGates_Mesolithic.SG
OC.SG	M	Romania_IronGates_Mesolithic.SG	6754	7022-6485calBCE(8277±34BP,MAMS-28615)	Romania	44.517	22.722	950046	PASS(literature)	Romania_IronGates_Mesolithic.SG
I10564	F	Russia_Afanasievo	2900	3300-2500BCE	Russia	54.3566	90.9192	339219	PASS(mtcontam=[0.945,0.972])	Russia_Afanasievo		Pooled_early_Steppe_pastoralists
I10565	F	Russia_Afanasievo	2776	2889-2668calBCE(4186±27BP,OxA-31221)	Russia	54.3566	90.9192	735620	PASS	Russia_Afanasievo		Pooled_early_Steppe_pastoralists
I11112	M	Russia_Afanasievo	2900	3050-2750BCE	Russia	53.8739	91.4697	599959	PASS(Xcontam=[0.006,0.02],damage.ss.half=0.046,mtcontam=[0.954,0.979])	Russia_Afanasievo		Pooled_early_Steppe_pastoralists
I11752	F	Russia_Afanasievo	2700	2900-2500BCE	Russia	51.312	83.0636	697749	PASS	Russia_Afanasievo		Pooled_early_Steppe_pastoralists
I1829	F	Russia_Afanasievo	2929	3011-2890calBCE(4320±21BP)[R_combine:(4270±25BP,PSUAMS-2109);(4409±34BP,UBA-29307)]	Russia	50.5542	86.5901	291825	PASS	Russia_Afanasievo		Pooled_early_Steppe_pastoralists
I2071	M	Russia_Afanasievo	2990	3088-2919calBCE(4389±18BP)[R_combine:(4260±35BP,Poz-83510);(4423±29BP,OxA-31219);(4442±29BP,OxA-31220)]	Russia	51.5	85.97	509531	PASS(damage.ds.half=0.033)	Russia_Afanasievo		Pooled_early_Steppe_pastoralists
I3387	M	Russia_Afanasievo	2775	2950-2600BCE	Russia	54.3566	90.9192	944165	PASS	Russia_Afanasievo		Pooled_early_Steppe_pastoralists
I3950	M	Russia_Afanasievo	2757	2879-2632calBCE(4160±25BP,PSUAMS-1955)	Russia	48.8327	83.9097	768534	PASS(mtcontam=[0.953,0.976])	Russia_Afanasievo		Pooled_early_Steppe_pastoralists
I3952	M	Russia_Afanasievo	2717	2868-2577calBCE(4120±30BP,PSUAMS-1957)	Russia	48.8327	83.9097	917159	PASS	Russia_Afanasievo		Pooled_early_Steppe_pastoralists
I3954	F	Russia_Afanasievo	2740	2874-2586calBCE(4140±25BP,PSUAMS-2293)	Russia	48.8327	83.9097	810871	PASS	Russia_Afanasievo		Pooled_early_Steppe_pastoralists
I5269	M	Russia_Afanasievo	2952	3016-2897calBCE(4335±25BP,PSUAMS-2350)	Russia	50.7581	85.5602	837461	PASS	Russia_Afanasievo		Pooled_early_Steppe_pastoralists
I5272	F	Russia_Afanasievo	2911	3006-2885calBCE(4305±20BP,PSUAMS-2351)	Russia	50.7565	85.5609	657546	PASS	Russia_Afanasievo		Pooled_early_Steppe_pastoralists
I5273	M	Russia_Afanasievo	2922	3011-2885calBCE(4310±25BP,PSUAMS-2352)	Russia	50.7536	85.5567	831605	PASS	Russia_Afanasievo		Pooled_early_Steppe_pastoralists
I5277	M	Russia_Afanasievo	3002	3092-2923BCE(4398±15BP)[R_combine:(4375±20BP,PSUAMS-2353);(4420±20BP,PSUAMS-2368)]	Russia	50.7565	85.5609	818967	PASS	Russia_Afanasievo		Pooled_early_Steppe_pastoralists
I5278	M	Russia_Afanasievo	2978	3082-2910calBCE(4370±25BP,PSUAMS-2354)	Russia	50.7536	85.5567	378345	PASS	Russia_Afanasievo		Pooled_early_Steppe_pastoralists
I5279	M	Russia_Afanasievo	2941	3011-2897calBCE(4330±20BP,PSUAMS-2355)	Russia	50.7536	85.5567	819809	PASS	Russia_Afanasievo		Pooled_early_Steppe_pastoralists
I6711	M	Russia_Afanasievo	2800	2950-2650BCE	Russia	54.3566	90.9192	220203	PASS	Russia_Afanasievo		Pooled_early_Steppe_pastoralists
I6713	F	Russia_Afanasievo	2500	3000-2000BCE	Russia	54.3566	90.9192	616129	PASS(damage.ds.half=0.039)	Russia_Afanasievo		Pooled_early_Steppe_pastoralists
I6715	F	Russia_Afanasievo	2900	3300-2500BCE	Russia	48.8327	83.9097	708932	PASS	Russia_Afanasievo		Pooled_early_Steppe_pastoralists
I3388_published	F	Russia_Afanasievo_published	2650	2700-2600BCE	Russia	48.8327	83.9097	702290	PASS	Russia_Afanasievo_published
RISE507.508.merge.SG	F	Russia_Afanasievo.SG	3127	3331-2922calBCE[unionoftwodates:3322-2922calBCE(4423±29BP,OxA-31219);3331-2933calBCE(4442±29BP,OxA-31220)]	Russia	51.498	85.97	415366	PASS(literature)	Russia_Afanasievo.SG
RISE509.SG	F	Russia_Afanasievo.SG	2776	2889-2668calBCE(4186±27BP,OxA-31221)	Russia	54.3566	90.9192	678474	PASS(literature)	Russia_Afanasievo.SG
RISE510.SG	F	Russia_Afanasievo.SG	2581	2848-2465calBCE(4040±45BP,OxA-31222)	Russia	54.3566	90.9192	239996	PASS(literature)	Russia_Afanasievo.SG
RISE500.SG	F	Russia_Andronovo.SG	1600	1700-1500BCE	Russia	53.456	85.447	871809	PASS(literature)	Russia_Andronovo.SG
RISE503.SG	F	Russia_Andronovo.SG	1597	1731-1510calBCE(3328±38BP,OxA-31445)	Russia	53.456	85.447	653791	PASS(literature)	Russia_Andronovo.SG
RISE505.SG	F	Russia_Andronovo.SG	1678	1862-1612calBCE(3391±27BP,OxA-31216)	Russia	53.456	85.447	1122100	PASS(literature)	Russia_Andronovo.SG
RK1001	M	Russia_Caucasus_EBA_Yamnaya	2767	2881-2639calBCE(4171±22BP,MAMS-29816)	Russia	45.5372	41.1165	609235	PASS(literature)	Russia_Caucasus_EBA_Yamnaya		Pooled_early_Steppe_pastoralists
RK1007	F	Russia_Caucasus_EBA_Yamnaya	3155	3331-3013calBCE(4447±22BP,MAMS-29818)	Russia	45.5372	41.1165	184096	PASS(literature)	Russia_Caucasus_EBA_Yamnaya		Pooled_early_Steppe_pastoralists
ZO2002	F	Russia_Caucasus_EBA_Yamnaya	2900	3300-2500BCE	Russia	45.659	42.6067	514467	PASS(literature)	Russia_Caucasus_EBA_Yamnaya		Pooled_early_Steppe_pastoralists
I2056	M	Russia_Caucasus_Eneolithic	4516	4607-4450calBCE(5687±30BP,OxA-43741)	Russia	44.4513	40.1029	698137	PASS	Russia_Caucasus_Eneolithic		Iran_N_pooled
SA6010	M	Russia_Caucasus_Eneolithic	3450	3550-3350BCE	Russia	45.7257	43.9869	372212	PASS(literature)	Russia_Caucasus_Eneolithic		Iran_N_pooled
MK5004	M	Russia_Caucasus_LateMaikop	3200	3400-3000BCE	Russia	43.9054	43.5219	811228	PASS(literature)	Russia_Caucasus_LateMaikop		Iran_N_pooled
MK5008	M	Russia_Caucasus_LateMaikop	3237	3369-3103calBCE(4544±25BP,MAMS-29810)	Russia	43.9054	43.5219	38545	PASS(literature)	Russia_Caucasus_LateMaikop		Iran_N_pooled
OSS001	F	Russia_Caucasus_Maikop	3632	3704-3535calBCE(4857±23BP,MAMS-29813)	Russia	43.0844	44.6327	382799	PASS(literature)	Russia_Caucasus_Maikop		EHG_pooled
I6266	M	Russia_Caucasus_Maikop_Novosvobodnaya	3435	3504-3348calBCE(4615±25BP,PSUAMS-3881)	Russia	44.385	40.3946	498628	PASS	Russia_Caucasus_Maikop_Novosvobodnaya		Iran_N_pooled
I6267	F	Russia_Caucasus_Maikop_Novosvobodnaya	3460	3637-3196calBCE(4675±70BP,OxA-5058)	Russia	44.385	40.3946	172630	PASS(literature)	Russia_Caucasus_Maikop_Novosvobodnaya		Iran_N_pooled
I6268	M	Russia_Caucasus_Maikop_Novosvobodnaya	3600	3766-3382calBCE(4835±60BP,OxA-5059)	Russia	44.385	40.3946	336886	PASS	Russia_Caucasus_Maikop_Novosvobodnaya		Iran_N_pooled
I6272	M	Russia_Caucasus_Maikop_Novosvobodnaya	3131	3337-2925calBCE[unionoftwodates:3337-3021calBCE(4460±30BP,PSUAMS-3905);3308-2925calBCE(4420±20BP,PSUAMS-4251)]	Russia	44.385	40.3946	396795	PASS	Russia_Caucasus_Maikop_Novosvobodnaya		Iran_N_pooled
I0061.SG	M	Russia_HG_Karelia.SG	6500	7050-5950BCE	Russia	61.65	35.65	999485	PASS(shotgun)	Russia_HG_Karelia.SG
RISE240.SG	F	Russia_Kalmykia_EBA_Yamnaya.SG	2755	2879-2631calBCE(4160±30BP,GrA-45038)	Russia	46.58	43.678	206474	PASS(literature)	Russia_Kalmykia_EBA_Yamnaya.SG
RISE546.SG	M	Russia_Kalmykia_EBA_Yamnaya.SG	2900	3300-2500BCE	Russia	46.539	43.699	164552	PASS(literature)	Russia_Kalmykia_EBA_Yamnaya.SG
RISE548.SG	M	Russia_Kalmykia_EBA_Yamnaya.SG	2900	3300-2500BCE	Russia	46.539	43.699	717431	PASS(literature)	Russia_Kalmykia_EBA_Yamnaya.SG
RISE550.SG	M	Russia_Kalmykia_EBA_Yamnaya.SG	2966	3335-2634calBCE(4312±94BP,IGAN-2880)	Russia	46.556	43.676	467373	PASS(literature)	Russia_Kalmykia_EBA_Yamnaya.SG
RISE552.SG	M	Russia_Kalmykia_EBA_Yamnaya.SG	2432	2846-2144calBCE(3940±90BP,IGAN-4079)	Russia	46.615	43.334	945230	PASS(literature)	Russia_Kalmykia_EBA_Yamnaya.SG
I0122	M	Russia_Khvalynsk_Eneolithic	4838	4936-4730calBCE(5960±25BP,PSUAMS-4031)	Russia	52.3534	48.0784	569453	PASS	Russia_Khvalynsk_Eneolithic		EHG_pooled
I0433	M	Russia_Khvalynsk_Eneolithic	4611	4697-4539calBCE(5760±25BP,PSUAMS-4032)	Russia	52.3534	48.0784	431545	PASS(mtcontam=[0.961,0.977])	Russia_Khvalynsk_Eneolithic		EHG_pooled
I0434	M	Russia_Khvalynsk_Eneolithic	4975	5198-4853calBCE(6070±25BP,PSUAMS-4033)	Russia	52.3534	48.0784	61851	PASS	Russia_Khvalynsk_Eneolithic		EHG_pooled
Kostenki14	M	Russia_Kostenki14	36102	37426-34726calBCE(33250±500BP,OxA-X-2395-15)	Russia	51.23	39.3	1095867	PASS	Russia_Kostenki14
SA6002	F	Russia_LateMaikop	3176	3332-3021calBCE(4454±23BP,MAMS-31139)	Russia	45.05	39.91	726411	PASS(literature)	Russia_LateMaikop
MA1.SG	M	Russia_MA1_HG.SG	22370	22621-22171calBCE(20240±60BP,UCIAMS-79666)	Russia	52.9	103.5	820035	PASS(literature)	Russia_MA1_HG.SG
I0126	M	Russia_MBA_Poltavka	2660	2867-2475calBCE(4081±54BP,AA-53803)	Russia	53.31	51.15	333925	PASS	Russia_MBA_Poltavka
I0374	M	Russia_MBA_Poltavka	2400	2800-2000BCE	Russia	49.9667	44.6667	869065	PASS(Xcontam=0.004)	Russia_MBA_Poltavka
I0440	M	Russia_MBA_Poltavka	2770	2887-2636calBCE(4180±30BP,Beta-392492)	Russia	53.38	50.39	1027134	PASS(Xcontam=0.003,damage.ds.half=0.04-0.049)	Russia_MBA_Poltavka
I6294	M	Russia_MBA_Poltavka	2759	2877-2635calBCE(4160±20BP,PSUAMS-2956)	Russia	53.5898	50.5713	684101	PASS(damage.ds.half=0.039)	Russia_MBA_Poltavka
I8745	M	Russia_MBA_Poltavka	2350	2500-2200BCE	Russia	49.9667	44.6667	596425	PASS(damage.ds.half=0.043)	Russia_MBA_Poltavka
I0371_published	M	Russia_MBA_Poltavka_published	2728	2871-2581calBCE(4130±30BP,Beta-392488)	Russia	53.5898	50.5713	599577	PASS(X-contam=0.017)	Russia_MBA_Poltavka_published
I7670	M	Russia_MLBA_Potapovka	2008	2129-1940calBCE(3640±20BP,PSUAMS-4274)	Russia	53.5898	50.5713	497335	PASS(damage.ds.half=0.033)	Russia_MLBA_Potapovka
I0937	F	Russia_MLBA_Sintashta	1875	2050-1700BCE	Russia	52.8167	60.4667	85607	PASS(damage.ds.half=0.03-0.034)	Russia_MLBA_Sintashta
I0938	F	Russia_MLBA_Sintashta	1875	2050-1700BCE	Russia	52.8167	60.4667	108935	PASS(damage.ds.half=0.037-0.048)	Russia_MLBA_Sintashta
I0939	F	Russia_MLBA_Sintashta	1875	2050-1700BCE	Russia	52.8167	60.4667	494646	PASS	Russia_MLBA_Sintashta
I0942	M	Russia_MLBA_Sintashta	1875	2050-1700BCE	Russia	52.8167	60.4667	149118	PASS(damage.ds.half=0.041-0.043)	Russia_MLBA_Sintashta
I0943	F	Russia_MLBA_Sintashta	1875	2050-1700BCE	Russia	52.8167	60.4667	704696	PASS(damage.ds.half=0.042-0.046)	Russia_MLBA_Sintashta
I0982	F	Russia_MLBA_Sintashta	1875	2050-1700BCE	Russia	52.8167	60.4667	74303	PASS(damage.ds.half=0.038)	Russia_MLBA_Sintashta
I0984	M	Russia_MLBA_Sintashta	1920	2024-1779calBCE(3572±29BP,OxA-12530)	Russia	52.8167	60.4667	684687	PASS	Russia_MLBA_Sintashta
I0986	M	Russia_MLBA_Sintashta	1875	2050-1700BCE	Russia	52.8167	60.4667	130945	PASS	Russia_MLBA_Sintashta
I0989	M	Russia_MLBA_Sintashta	1875	2050-1700BCE	Russia	52.8167	60.4667	222411	PASS(damage.ds.half=0.045-0.049)	Russia_MLBA_Sintashta
I1003	M	Russia_MLBA_Sintashta	1875	2050-1700BCE	Russia	52.8167	60.4667	62743	PASS	Russia_MLBA_Sintashta
I1006	M	Russia_MLBA_Sintashta	1875	2050-1700BCE	Russia	52.8167	60.4667	79292	PASS	Russia_MLBA_Sintashta
I1008	M	Russia_MLBA_Sintashta	1875	2050-1700BCE	Russia	52.8167	60.4667	309789	PASS	Russia_MLBA_Sintashta
I1011	M	Russia_MLBA_Sintashta	1875	2050-1700BCE	Russia	52.8167	60.4667	873259	PASS	Russia_MLBA_Sintashta
I1013	F	Russia_MLBA_Sintashta	1875	2050-1700BCE	Russia	52.8167	60.4667	53300	PASS	Russia_MLBA_Sintashta
I1018	M	Russia_MLBA_Sintashta	1875	2050-1700BCE	Russia	52.8167	60.4667	334635	PASS	Russia_MLBA_Sintashta
I1019	M	Russia_MLBA_Sintashta	1875	2050-1700BCE	Russia	52.8167	60.4667	392870	PASS(damage.ds.half=0.048)	Russia_MLBA_Sintashta
I1022	F	Russia_MLBA_Sintashta	1875	2050-1700BCE	Russia	52.8167	60.4667	217559	PASS	Russia_MLBA_Sintashta
I1024	F	Russia_MLBA_Sintashta	1875	2050-1700BCE	Russia	52.8167	60.4667	475329	PASS(damage.ds.half=0.048-0.079)	Russia_MLBA_Sintashta
I1027	M	Russia_MLBA_Sintashta	1883	2008-1773calBCE(3550±25BP,PSUAMS-1954)	Russia	52.8167	60.4667	993163	PASS(Xcontam=0.006)	Russia_MLBA_Sintashta
I1029	F	Russia_MLBA_Sintashta	1880	2012-1772calBCE(3549±29BP,OxA-12531)	Russia	52.8167	60.4667	580668	PASS	Russia_MLBA_Sintashta
I1053	M	Russia_MLBA_Sintashta	1835	1928-1751calBCE(3520±25BP,PSUAMS-2064)	Russia	52.8167	60.4667	866643	PASS	Russia_MLBA_Sintashta
I1060	F	Russia_MLBA_Sintashta	1875	2050-1700BCE	Russia	52.8167	60.4667	159289	PASS(damage.ds.half=0.045)	Russia_MLBA_Sintashta
I1061	F	Russia_MLBA_Sintashta	1875	2050-1700BCE	Russia	52.8167	60.4667	222862	PASS	Russia_MLBA_Sintashta
I1062	F	Russia_MLBA_Sintashta	1875	2050-1700BCE	Russia	52.8167	60.4667	170444	PASS	Russia_MLBA_Sintashta
I1063	F	Russia_MLBA_Sintashta	1875	2050-1700BCE	Russia	52.8167	60.4667	496245	PASS	Russia_MLBA_Sintashta
I1064	M	Russia_MLBA_Sintashta	1789	1879-1693calBCE(3460±20BP,PSUAMS-2102)	Russia	52.8167	60.4667	840565	PASS(Xcontam=[0.006,0.014])	Russia_MLBA_Sintashta
I1065	M	Russia_MLBA_Sintashta	1875	2050-1700BCE	Russia	52.8167	60.4667	171414	PASS	Russia_MLBA_Sintashta
I1082	M	Russia_MLBA_Sintashta	1875	2050-1700BCE	Russia	52.8167	60.4667	294473	PASS	Russia_MLBA_Sintashta
I1084	M	Russia_MLBA_Sintashta	1875	2050-1700BCE	Russia	52.8167	60.4667	267279	PASS	Russia_MLBA_Sintashta
I1086	M	Russia_MLBA_Sintashta	1875	2050-1700BCE	Russia	52.8167	60.4667	464685	PASS	Russia_MLBA_Sintashta
I1088	F	Russia_MLBA_Sintashta	1875	2050-1700BCE	Russia	52.8167	60.4667	257140	PASS	Russia_MLBA_Sintashta
I1089	F	Russia_MLBA_Sintashta	1875	2050-1700BCE	Russia	52.8167	60.4667	830007	PASS	Russia_MLBA_Sintashta
I1090	F	Russia_MLBA_Sintashta	1875	2050-1700BCE	Russia	52.8167	60.4667	488227	PASS	Russia_MLBA_Sintashta
I7480	F	Russia_MLBA_Sintashta	1875	2050-1700BCE	Russia	52.8167	60.4667	859417	PASS	Russia_MLBA_Sintashta
I1012_published	M	Russia_MLBA_Sintashta_published	1875	2050-1700BCE	Russia	52.8167	60.4667	292528	PASS(literature)	Russia_MLBA_Sintashta_published
RISE386.SG	M	Russia_MLBA_Sintashta.SG	2197	2335-2041calBCE(3775±34BP,OxA-30991)	Russia	52.453	55.16	309690	PASS(literature)	Russia_MLBA_Sintashta.SG
RISE394.SG	F	Russia_MLBA_Sintashta.SG	1853	1953-1748calBCE(3532±34BP,OxA-30993)	Russia	52.453	55.16	325196	PASS(literature)	Russia_MLBA_Sintashta.SG
RISE395.SG	F	Russia_MLBA_Sintashta.SG	1865	2008-1750calBCE(3540±33BP,OxA-30996)	Russia	52.637	59.536	857114	PASS(literature)	Russia_MLBA_Sintashta.SG
BU2001	M	Russia_North_Caucasus	2725	2866-2582calBCE(4125±19BP,HD-29619)	Russia	44.0236	42.8185	308405	PASS(literature)	Russia_North_Caucasus
GW1001	M	Russia_North_Caucasus	2768	2883-2638calBCE(4174±24BP,MAMS-29807)	Russia	44.0319	43.13	531046	PASS(literature)	Russia_North_Caucasus
LYG001	M	Russia_North_Caucasus	2720	2866-2580calBCE(4122±23BP,MAMS-29825)	Russia	44.0534	43.2103	552955	PASS(literature)	Russia_North_Caucasus
MK5009	M	Russia_North_Caucasus	2755	2879-2631calBCE(4160±30BP,MAMS-110549)	Russia	43.9054	43.5219	427531	PASS(literature)	Russia_North_Caucasus
PG2002	F	Russia_North_Caucasus	2411	2476-2303calBCE(3929±22BP,MAMS-29815)	Russia	43.8227	43.3503	272729	PASS(literature)	Russia_North_Caucasus
RK1003	F	Russia_North_Caucasus	2814	2899-2701calBCE(4218±24BP,MAMS-29817)	Russia	45.5372	41.1165	170332	PASS(literature)	Russia_North_Caucasus
KBD001	M	Russia_North_Caucasus_MBA	2080	2197-1975calBCE(3690±30BP,UGAMS-13455)	Russia	43.8263	42.7162	926219	PASS(literature)	Russia_North_Caucasus_MBA
KDC001	M	Russia_North_Caucasus_MBA	1888	1950-1778BCE(3551±17BP)[R_combine:(3548±23BP,MAMS-110560);(3554±23BP,MAMS-110561)]	Russia	43.354	43.7219	729183	PASS(literature)	Russia_North_Caucasus_MBA
KDC002	F	Russia_North_Caucasus_MBA	1800	1900-1700BCE	Russia	43.354	43.7219	659735	PASS(literature)	Russia_North_Caucasus_MBA
I0944	F	Russia_Petrovka	1870	2026-1701calBCE(3540±52BP,AA-90949)	Russia	53.876	59.076	61601	PASS	Russia_Petrovka
I0945	F	Russia_Petrovka	1950	2200-1700BCE	Russia	53.876	59.076	199936	PASS(mtmatchmax=1-0.978)	Russia_Petrovka
I0946	F	Russia_Petrovka	1936	2133-1751calBCE(3584±55BP,AA-90948)	Russia	53.876	59.076	91812	PASS(mtmatchmax=0.99-0.977)	Russia_Petrovka
I0246	M	Russia_Potapovka	2188	2468-1925calBCE(3760±100BP,AA-12568)	Russia	52.9128	50.9906	176641	PASS	Russia_Potapovka
I0418	F	Russia_Potapovka	1934	2131-1767calBCE(3583±52BP,AA-53802)	Russia	52.9128	50.9906	133342	PASS	Russia_Potapovka
I0357	F	Russia_Samara_EBA_Yamnaya	2992	3093-2911calBCE(4380±30BP,Beta-392489)	Russia	53.64	50.655	523435	PASS	Russia_Samara_EBA_Yamnaya		Pooled_early_Steppe_pastoralists
I0370	M	Russia_Samara_EBA_Yamnaya	2900	3300-2500BCE	Russia	51.27	58.18	695086	PASS	Russia_Samara_EBA_Yamnaya		Pooled_early_Steppe_pastoralists
I0429	M	Russia_Samara_EBA_Yamnaya	3124	3339-2916calBCE(4432±66BP,AA-47804)	Russia	53.64	50.655	603212	PASS	Russia_Samara_EBA_Yamnaya		Pooled_early_Steppe_pastoralists
I0438	M	Russia_Samara_EBA_Yamnaya	2835	3020-2631calBCE(4254±61BP,AA-47807)	Russia	53.38	50.38	567478	PASS	Russia_Samara_EBA_Yamnaya		Pooled_early_Steppe_pastoralists
I0439	M	Russia_Samara_EBA_Yamnaya	3071	3322-2921calBCE(4420±30BP,Beta-392491)	Russia	53.64	50.655	268426	PASS	Russia_Samara_EBA_Yamnaya		Pooled_early_Steppe_pastoralists
I0441	F	Russia_Samara_EBA_Yamnaya	2802	3010-2623calBCE(4234±60BP,AA-47805)	Russia	52.3	52.05	101678	PASS	Russia_Samara_EBA_Yamnaya		Pooled_early_Steppe_pastoralists
I0443	M	Russia_Samara_EBA_Yamnaya	2900	3300-2500BCE	Russia	53.64	50.655	995838	PASS(Xcontam=0.003)	Russia_Samara_EBA_Yamnaya		Pooled_early_Steppe_pastoralists
I0444	M	Russia_Samara_EBA_Yamnaya	3053	3335-2883calBCE(4370±75BP,AA-12570)	Russia	53.1812	51.2225	539947	PASS(Xcontam=0.015)	Russia_Samara_EBA_Yamnaya		Pooled_early_Steppe_pastoralists
I7489	F	Russia_Samara_EBA_Yamnaya	3097	3326-2926calBCE(4430±25BP,PSUAMS-5790)	Russia	52.9128	50.9906	656704	PASS	Russia_Samara_EBA_Yamnaya		Pooled_early_Steppe_pastoralists
I0231_published	M	Russia_Samara_EBA_Yamnaya_published2	2894	2911-2881BCE(4270±17BP)[R_combine:(4260±30BP,Beta-392487);(4275±20BP,PSUAMS-4279)]	Russia	52.7109	49.4669	1103245	PASS(Xcontam=0.01)	Russia_Samara_EBA_Yamnaya		Pooled_early_Steppe_pastoralists
I0232	M	Russia_Srubnaya	1525	1850-1200BCE	Russia	48.1	54.44	1112239	PASS	Russia_Srubnaya
I0234	F	Russia_Srubnaya	1725	1850-1600BCE	Russia	53.14	50.01	451400	PASS	Russia_Srubnaya
I0235	F	Russia_Srubnaya	1725	1850-1600BCE	Russia	53.14	50.01	404082	PASS	Russia_Srubnaya
I0358	F	Russia_Srubnaya	1769	1921-1619calBCE(3455±56BP,AA-47808)	Russia	53.03	50.39	406361	PASS	Russia_Srubnaya
I0359	F	Russia_Srubnaya	1525	1850-1200BCE	Russia	53.03	50.39	866715	PASS	Russia_Srubnaya
I0361	M	Russia_Srubnaya	1525	1850-1200BCE	Russia	53.03	50.39	550931	PASS	Russia_Srubnaya
I0422	F	Russia_Srubnaya	1525	1850-1200BCE	Russia	52.54	50.5	876789	PASS	Russia_Srubnaya
I0423	M	Russia_Srubnaya	1525	1850-1200BCE	Russia	52.54	50.5	412140	PASS	Russia_Srubnaya
I0424	M	Russia_Srubnaya	1725	1850-1600BCE	Russia	53.12	48.37	619183	PASS(Xcontam=[0.006,0.05])	Russia_Srubnaya
I0430	M	Russia_Srubnaya	1725	1850-1600BCE	Russia	53.08	50.36	978891	PASS	Russia_Srubnaya
I0431	F	Russia_Srubnaya	1725	1850-1600BCE	Russia	53.08	50.36	253515	PASS(damage.ds.half=0.039-0.05)	Russia_Srubnaya
kzb001.SG	F	Russia_Srubnaya_Alakul.SG	1640	1740-1539calBCE(3360±30BP,Beta-451578)	Russia	54.07	55.544	200323	PASS(literature)	Russia_Srubnaya_Alakul.SG
kzb002.SG	M	Russia_Srubnaya_Alakul.SG	1754	1879-1632calBCE(3440±30BP,Beta-451579)	Russia	54.07	55.544	1107285	PASS(literature)	Russia_Srubnaya_Alakul.SG
kzb003.SG	M	Russia_Srubnaya_Alakul.SG	1703	1870-1619calBCE(3410±30BP,Beta-451577)	Russia	54.07	55.544	143688	PASS(literature)	Russia_Srubnaya_Alakul.SG
kzb004.SG	F	Russia_Srubnaya_Alakul.SG	1711	1872-1620calBCE(3415±31BP,Ua-56444)	Russia	54.07	55.544	22010	PASS(literature)	Russia_Srubnaya_Alakul.SG
kzb006.SG	F	Russia_Srubnaya_Alakul.SG	1698	1868-1618calBCE(3407±30BP,Ua-56446)	Russia	54.07	55.544	779532	PASS(literature)	Russia_Srubnaya_Alakul.SG
kzb007.SG	M	Russia_Srubnaya_Alakul.SG	1722	1873-1623calBCE(3422±30BP,Ua-56447)	Russia	54.07	55.544	1072298	PASS(literature)	Russia_Srubnaya_Alakul.SG
kzb008.SG	M	Russia_Srubnaya_Alakul.SG	1804	1887-1696calBCE(3479±30BP,Ua-56448)	Russia	54.07	55.544	824064	PASS(literature)	Russia_Srubnaya_Alakul.SG
kzb009.SG	F	Russia_Srubnaya_Alakul.SG	1690	1866-1616calBCE(3401±29BP,Ua-56449)	Russia	54.07	55.544	618190	PASS(literature)	Russia_Srubnaya_Alakul.SG
mur001.SG	F	Russia_Srubnaya_Alakul.SG	1640	1740-1539calBCE(3360±30BP,Beta-497470)	Russia	52.583	56.847	76857	PASS(literature)	Russia_Srubnaya_Alakul.SG
mur002.SG	M	Russia_Srubnaya_Alakul.SG	1583	1680-1509calBCE(3320±30BP,Beta-497471)	Russia	52.583	56.847	39234	PASS(literature)	Russia_Srubnaya_Alakul.SG
mur003.SG	M	Russia_Srubnaya_Alakul.SG	1771	1881-1642calBCE(3450±30BP,Beta-451574)	Russia	52.583	56.847	1075122	PASS(literature)	Russia_Srubnaya_Alakul.SG
mur004.SG	F	Russia_Srubnaya_Alakul.SG	1805	1888-1696calBCE(3480±30BP,Beta-451573)	Russia	52.583	56.847	833938	PASS(literature)	Russia_Srubnaya_Alakul.SG
AY2003	F	Russia_Steppe_Maikop	3502	3630-3376calBCE(4726±31BP,OxA-16147)	Russia	45.6883	43.2646	745293	PASS(literature)	Russia_Steppe_Maikop		EHG_pooled
SA6001	F	Russia_Steppe_Maikop	3447	3520-3371calBCE(4673±28BP,MAMS-31143)	Russia	45.7257	43.9869	743648	PASS(literature)	Russia_Steppe_Maikop		EHG_pooled
SA6004	M	Russia_Steppe_Maikop	3209	3359-3034calBCE(4500±40BP,GIN-12401)	Russia	45.7257	43.9869	775252	PASS(literature)	Russia_Steppe_Maikop		EHG_pooled
Ust_Ishim_published.DG	M	Russia_Ust_Ishim_HG_published.DG	42416	43980-40954calBCE(41400±953BP)[R_combine:(41400±1300BP,OxA-25516);(41400±1400BP,OxA-30190)]	Russia	57.7	71.1	1147829	PASS(literature)	Russia_Ust_Ishim_HG_published.DG
I5367	F	Scotland_BellBeaker	2362	2466-2209calBCE(3879±32BP,OxA-14722)	GreatBritain	56.6809	-6.45982	750069	PASS	Scotland_BellBeaker
I5385	F	Scotland_BellBeaker	2280	2454-2146calBCE(3827±33BP,SUERC-71005)	GreatBritain	58.3648	-3.40351	543435	PASS	Scotland_BellBeaker
I2567	M	Scotland_C_EBA	2054	2276-1831calBCE[unionoftwodates:2134-1831calBCE(3615±40BP,SUERC-4072);2276-1985calBCE(3725±35BP,SUERC-4083)]	GreatBritain	55.97	-2.444	589224	PASS	Scotland_C_EBA
I2981	F	Scotland_C_EBA	1761	1880-1635BCE(3444±32BP)[R_combine:(3320±50BP,AA-51418);(3520±40BP,AA-43651)]	GreatBritain	59.281	-2.425	788384	PASS	Scotland_C_EBA
I3132	M	Scotland_C_EBA	1977	2126-1886calBCE(3614±33BP,SUERC-69070)	GreatBritain	57.721	-3.3881	773258	PASS(Xcontam=[0.008,0.014])	Scotland_C_EBA
I5515	M	Scotland_C_EBA	1932	2112-1774calBCE(3581±40BP,SRR-292)	GreatBritain	56.062	-3.41918	169789	PASS	Scotland_C_EBA
I5516	M	Scotland_C_EBA	1691	1872-1547calBCE(3400±35BP,SUERC-2869)	GreatBritain	56.1927	-4.0577	246356	PASS	Scotland_C_EBA
I2569_published	M	Scotland_C_EBA_published	2028	2140-1901calBCE(3650±40BP,SUERC-5318)	GreatBritain	55.99	-2.537	23665	PASS(literature)	Scotland_C_EBA_published
I2859	M	Scotland_LBA	860	912-808calBCE(2714±29BP,SUERC-68714)	GreatBritain	57.72	-3.388	810185	PASS(damage.ds.half=0.038)	Scotland_LBA
I2860	M	Scotland_LBA	874	969-812calBCE(2738±29BP,SUERC-68715)	GreatBritain	57.721	-3.3881	830544	PASS(damage.ds.half=0.043)	Scotland_LBA
I2861	F	Scotland_LBA	893	983-826calBCE(2757±29BP,SUERC-68716)	GreatBritain	57.721	-3.3881	615178	PASS	Scotland_LBA
I3130	F	Scotland_LBA	894	984-826calBCE(2758±29BP,SUERC-68713)	GreatBritain	57.72	-3.388	811519	PASS	Scotland_LBA
I2656_published_d	M	Scotland_LBA_published	1131	1283-940calBCE(2930±50BP,GU-2762)	GreatBritain	55.97	-2.896	15271	PASS(literature)	Scotland_LBA_published
I2573	F	Scotland_MBA	1411	1502-1302calBCE(3144±37BP,OxA-16486)	GreatBritain	55.98	-2.896	611500	PASS	Scotland_MBA
I2653	M	Scotland_MBA	1274	1389-1131calBCE(3019±26BP,SUERC-75916)	GreatBritain	55.98	-2.896	574585	PASS	Scotland_MBA
I2654	F	Scotland_MBA	1337	1419-1261calBCE(3074±29BP,SUERC-75917)	GreatBritain	55.98	-2.896	518165	PASS	Scotland_MBA
I2655	M	Scotland_MBA	1361	1445-1268calBCE(3105±35BP,SUERC-9172)	GreatBritain	58.23	-6.935	835188	PASS	Scotland_MBA
bal004.SG	F	Scotland_Megalithic.SG	3236	3368-3103calBCE(4543±24BP,MAMS-21254)	GreatBritain	57.756	-3.909	769163	PASS(literature)	Scotland_Megalithic.SG		Neolithic_Europe_pooled
lai001.SG	M	Scotland_Megalithic.SG	3228	3367-3102calBCE(4537±34BP,SUERC-45833)	GreatBritain	59.053	-2.853	124044	PASS(literature)	Scotland_Megalithic.SG		Neolithic_Europe_pooled
mid001.SG	M	Scotland_Megalithic.SG	3223	3364-3102calBCE(4531±28BP,SUERC-46401)	GreatBritain	59.157	-3.099	210400	PASS(literature)	Scotland_Megalithic.SG		Neolithic_Europe_pooled
mid002.SG	M	Scotland_Megalithic.SG	3460	3623-3372calBCE(4700±30BP,SUERC-46400)	GreatBritain	59.157	-3.099	202766	PASS(literature)	Scotland_Megalithic.SG		Neolithic_Europe_pooled
I2630	M	Scotland_N	2521	2618-2461calBCE(3999±32BP,SUERC-68632)	GreatBritain	58.74	-2.916	932048	PASS	Scotland_N
I2631	M	Scotland_N	3007	3263-2905calBCE(4384±36BP,SUERC-68633)	GreatBritain	59.23	-2.568	869547	PASS	Scotland_N
I2633	F	Scotland_N	3689	3768-3638calBCE(4911±32BP,SUERC-68634)	GreatBritain	58.53	-3.603	724631	PASS(batch.flag,mtcontam=[0.961,0.978])	Scotland_N
I2634	M	Scotland_N	3617	3707-3528calBCE(4851±34BP,SUERC-68638)	GreatBritain	58.54	-3.598	477633	PASS(mtcontam=0.737-0.993)	Scotland_N
I2635	M	Scotland_N	3573	3647-3517calBCE(4796±37BP,SUERC-68639)	GreatBritain	58.53	-3.603	761604	PASS(batch.flag)	Scotland_N
I2636	F	Scotland_N	3447	3516-3365calBCE(4651±33BP,SUERC-68640)	GreatBritain	59.35	-2.873	848224	PASS	Scotland_N
I2637	M	Scotland_N	3425	3510-3340calBCE(4697±33BP,SUERC-68641)	GreatBritain	59.35	-2.873	843761	PASS	Scotland_N
I2650	M	Scotland_N	3430	3500-3360calBCE(4754±36BP,SUERC-68642)	GreatBritain	59.35	-2.873	770497	PASS	Scotland_N
I2651	F	Scotland_N	3210	3330-3090calBCE(4525±36BP,SUERC-68643)	GreatBritain	59.35	-2.873	768079	PASS	Scotland_N
I2657	M	Scotland_N	3864	3955-3773calBCE(5052±30BP,SUERC-68701)	GreatBritain	56.42	-5.472	146338	PASS	Scotland_N
I2659	F	Scotland_N	3687	3766-3640calBCE(4914±27BP,SUERC-68702)	GreatBritain	56.41	-5.471	792497	PASS	Scotland_N
I2932	M	Scotland_N	2483	2572-2348calBCE(3962±29BP,SUERC-68721)	GreatBritain	58.74	-2.916	786582	PASS	Scotland_N
I2933	M	Scotland_N	2927	3011-2884calBCE(4309±29BP,SUERC-68722)	GreatBritain	58.74	-2.916	736264	PASS	Scotland_N
I2934	F	Scotland_N	3188	3340-3023calBCE(4466±33BP,SUERC-69071)	GreatBritain	58.74	-2.916	745801	PASS	Scotland_N
I2935	M	Scotland_N	3165	3336-2939calBCE(4451±29BP,SUERC-68723)	GreatBritain	58.74	-2.916	805005	PASS	Scotland_N
I2977	M	Scotland_N	2893	3010-2708calBCE(4275±33BP,SUERC-69072)	GreatBritain	58.74	-2.916	784516	PASS	Scotland_N
I2978	M	Scotland_N	3190	3336-3024calBCE(4464±29BP,SUERC-68725)	GreatBritain	58.74	-2.916	801316	PASS	Scotland_N
I2979	M	Scotland_N	3154	3334-2935calBCE(4447±29BP,SUERC-68726)	GreatBritain	58.74	-2.916	799002	PASS	Scotland_N
I2980	F	Scotland_N	3223	3364-3101calBCE(4530±33BP,SUERC-69073)	GreatBritain	59.3101	-2.94071	802432	PASS	Scotland_N
I2988	F	Scotland_N	3447	3516-3362calBCE(4645±29BP,SUERC-68711)	GreatBritain	55.4	-5.2	795840	PASS	Scotland_N
I3085	F	Scotland_N	3199	3340-3027calBCE(4471±29BP,SUERC-68724)	GreatBritain	58.74	-2.916	726028	PASS	Scotland_N
I3133	M	Scotland_N	3496	3627-3377calBCE(4725±20BP,PSUAMS-2154)	GreatBritain	56.4033	-5.47806	800141	PASS	Scotland_N
I3134	M	Scotland_N	3511	3630-3377calBCE(4730±25BP,PSUAMS-2155)	GreatBritain	56.4033	-5.47806	807346	PASS	Scotland_N
I3136	F	Scotland_N	3447	3516-3370calBCE(4665±30BP,PSUAMS-2069)	GreatBritain	56.4033	-5.47806	791804	PASS	Scotland_N
I3138	F	Scotland_N	3048	3312-2920calBCE(4415±25BP,PSUAMS-2156)	GreatBritain	56.4033	-5.47806	813553	PASS	Scotland_N
I5370	F	Scotland_N	3650	4000-3300BCE	GreatBritain	56.4146	-5.46918	49903	PASS	Scotland_N
I5371	F	Scotland_N	3650	4000-3300BCE	GreatBritain	56.4146	-5.46918	329232	PASS(mtcontam=[0.963,0.976])	Scotland_N
I6764	F	Scotland_N	3150	3800-2500BCE	GreatBritain	57.9073	-3.99683	314329	PASS(mtcontam=[0.946,0.963])	Scotland_N
I6766	F	Scotland_N	3150	3800-2500BCE	GreatBritain	57.9073	-3.99683	687791	PASS	Scotland_N
I7554	M	Scotland_N	3232	3368-3102calBCE(4541±32BP,SUERC-73433)	GreatBritain	58.9863	-3.249	789511	PASS	Scotland_N
I2629_published	M	Scotland_N_published	2850	3350-2350BCE	GreatBritain	58.74	-2.916	22180	PASS(literature,damage.ss.half=0.049)	Scotland_N_published
I2796_published	M	Scotland_N_published	3621	3706-3536calBCE(4856±33BP,SUERC-69074)	GreatBritain	59.3101	-2.94071	37910	PASS	Scotland_N_published
I3137_published	M	Scotland_N_published	3500	3800-3200BCE	GreatBritain	56.4033	-5.47806	86073	PASS(literature)	Scotland_N_published
I6764.SG	F	Scotland_N.SG	3150	3800-2500BCE	GreatBritain	57.9073	-3.99683	344213	PASS(literature)	Scotland_N.SG
I6766.SG	F	Scotland_N.SG	3150	3800-2500BCE	GreatBritain	57.9073	-3.99683	744205	PASS(literature)	Scotland_N.SG
SB527A_lib.SG	F	Scotland_N.SG	3650	4000-3300BCE	GreatBritain	56.4146	-5.46918	39687	PASS(literature)	Scotland_N.SG
SB528A_lib.SG	F	Scotland_N.SG	3650	4000-3300BCE	GreatBritain	56.4146	-5.46918	269212	PASS(literature)	Scotland_N.SG
I5405	F	Serbia_IronGates_N	5734	5836-5632calBCE(6829±53BP,AA-58320)	Serbia	44.5529	22.0276	206255	PASS	Serbia_IronGates_N
I4665_published	F	Serbia_IronGates_N_published	6056	6205-5907calBCE(7155±54BP,OxA-25210)	Serbia	44.5529	22.0276	22611	PASS(literature)	Serbia_IronGates_N_published
I4666_published	M	Serbia_IronGates_N_published	6067	6222-5912calBCE(7179±73BP,OxA-25211)	Serbia	44.5529	22.0276	38986	PASS(literature)	Serbia_IronGates_N_published
I4383	F	Sicily_EBA	2100	2600-1400BCE	Italy	37.8724	13.9346	15325	PASS	Sicily_EBA
ATP9.SG	F	Spain_BA.SG	1678	1863-1564calBCE(3390±30BP,Beta-386395)	Spain	42.3525	-3.51833	430551	PASS	Spain_BA.SG		Spain_BA_merged
COV20126.SG	M	Spain_BA.SG	1682	1751-1615calBCE(3395±26BP,MAMS-28613)	Spain	37.4061	-4.41639	133226	PASS(literature)	Spain_BA.SG		Spain_BA_merged
esp005.SG	M	Spain_BA.SG	1450	1600-1300BCE	Spain	42.3229	-2.41212	943381	PASS(literature)	Spain_BA.SG		Spain_BA_merged
pir001.SG	M	Spain_BA.SG	1775	2100-1450BCE	Spain	37.4378	-4.19832	164144	PASS(literature)	Spain_BA.SG		Spain_BA_merged
I0257	M	Spain_C	2489	2573-2348calBCE(3965±29BP,MAMS-25937)	Spain	41.4919	2.13889	107954	PASS(mtcontam=[0.945,0.977])	Spain_C		Neolithic_Europe_pooled
I0258	F	Spain_C	2550	2850-2250BCE	Spain	41.4919	2.13889	62877	PASS	Spain_C		Neolithic_Europe_pooled
I0260	F	Spain_C	2550	2850-2250BCE	Spain	41.4919	2.13889	51816	PASS	Spain_C		Neolithic_Europe_pooled
I0261	M	Spain_C	2550	2850-2250BCE	Spain	41.4919	2.13889	52264	PASS	Spain_C		Neolithic_Europe_pooled
I0262	F	Spain_C	2550	2850-2250BCE	Spain	41.4919	2.13889	92174	PASS	Spain_C		Neolithic_Europe_pooled
I0263	F	Spain_C	2550	2850-2250BCE	Spain	41.4919	2.13889	31569	PASS	Spain_C		Neolithic_Europe_pooled
I0453	M	Spain_C	2289	2456-2146calBCE(3830±40BP,Beta-261524)	Spain	38.1	-1.85	42882	PASS	Spain_C		Neolithic_Europe_pooled
I0455	M	Spain_C	2787	2905-2636calBCE(4210±40BP,Beta-261529)	Spain	38.1	-1.85	46870	PASS	Spain_C		Neolithic_Europe_pooled
I0457	M	Spain_C	2550	3000-2100BCE	Spain	38.1	-1.85	19814	PASS	Spain_C		Neolithic_Europe_pooled
I0459	F	Spain_C	2400	2600-2200BCE	Spain	42.4	-3.75	527866	PASS	Spain_C		Neolithic_Europe_pooled
I0460	M	Spain_C	2337	2460-2206calBCE(3860±30BP,UGA-15905)	Spain	42.4	-3.75	344361	PASS	Spain_C		Neolithic_Europe_pooled
I0823	F	Spain_C	2550	2850-2250BCE	Spain	41.4919	2.13889	60463	PASS	Spain_C		Neolithic_Europe_pooled
I0825	M	Spain_C	2396	2471-2296calBCE(3915±29BP,MAMS-25939)	Spain	41.4919	2.13889	42018	PASS	Spain_C		Neolithic_Europe_pooled
I0826	M	Spain_C	2572	2835-2473calBCE(4051±28BP,MAMS-25940)	Spain	41.4919	2.13889	112957	PASS	Spain_C		Neolithic_Europe_pooled
I1271	F	Spain_C	2600	2900-2300BCE	Spain	42.3333	-3.5	231359	PASS	Spain_C		Neolithic_Europe_pooled
I1272	F	Spain_C	2645	2857-2492calBCE(4080±30BP,Beta-416456)	Spain	42.3333	-3.5	578928	PASS	Spain_C		Neolithic_Europe_pooled
I1276	F	Spain_C	2600	2900-2300BCE	Spain	42.3333	-3.5	113480	PASS	Spain_C		Neolithic_Europe_pooled
I1277	M	Spain_C	2453	2570-2342calBCE(3950±30BP,Beta-416457)	Spain	42.3333	-3.5	553616	PASS	Spain_C		Neolithic_Europe_pooled
I1280	F	Spain_C	2600	2900-2300BCE	Spain	42.3333	-3.5	202133	PASS	Spain_C		Neolithic_Europe_pooled
I1281	F	Spain_C	2703	2867-2573calBCE(4110±30BP,Beta-416458)	Spain	42.3333	-3.5	623901	PASS	Spain_C		Neolithic_Europe_pooled
I1282	M	Spain_C	2600	2900-2300BCE	Spain	42.3333	-3.5	68114	PASS(damage.ds.half=0.042)	Spain_C		Neolithic_Europe_pooled
I1284	M	Spain_C	2600	2900-2300BCE	Spain	42.3333	-3.5	123157	PASS	Spain_C		Neolithic_Europe_pooled
I1300	F	Spain_C	2600	2900-2300BCE	Spain	42.3333	-3.5	779093	PASS	Spain_C		Neolithic_Europe_pooled
I1303	M	Spain_C	2600	2900-2300BCE	Spain	42.3333	-3.5	457683	PASS	Spain_C		Neolithic_Europe_pooled
I1553	F	Spain_C	2550	2850-2250BCE	Spain	41.4919	2.13889	37205	PASS	Spain_C		Neolithic_Europe_pooled
I1838	F	Spain_C	3176	3356-2936calBCE(4470±50BP,Poz-83429)	Spain	42.63	-2.7	828755	PASS	Spain_C		Neolithic_Europe_pooled
I1842	M	Spain_C	2900	3000-2800BCE	Spain	42.63	-2.7	458333	PASS(damage.ds.half=0.049)	Spain_C		Neolithic_Europe_pooled
I1843	F	Spain_C	2954	3015-2901BCE(4340±22BP)[R_combine:(4390±30BP,Beta-301225);(4290±30BP,Beta-301226)]	Spain	42.57	-2.57	642557	PASS(damage.ds.half=0.048)	Spain_C		Neolithic_Europe_pooled
I1845	M	Spain_C	2875	3100-2650BCE	Spain	42.57	-2.57	410700	PASS(mtcontam=[0.939,0.968])	Spain_C		Neolithic_Europe_pooled
I1846	F	Spain_C	2875	3100-2650BCE	Spain	42.57	-2.57	650008	PASS	Spain_C		Neolithic_Europe_pooled
I1975	M	Spain_C	2977	3092-2893calBCE(4350±40BP,Beta-288937)	Spain	42.57	-2.55	105261	PASS(mtcontam=[0.937,0.964])	Spain_C		Neolithic_Europe_pooled
I1976	M	Spain_C	2477	2571-2347calBCE(3960±30BP,Beta-299306)	Spain	42.57	-2.62	138607	PASS	Spain_C		Neolithic_Europe_pooled
I1978	F	Spain_C	2875	3100-2650BCE	Spain	42.57	-2.57	846972	PASS	Spain_C		Neolithic_Europe_pooled
I1981	F	Spain_C	2941	3013-2889calBCE(4320±30BP,Beta-301223)	Spain	42.57	-2.57	117327	PASS	Spain_C		Neolithic_Europe_pooled
I2467	M	Spain_C	2377	2474-2209calBCE(3900±40BP,Beta-299300)	Spain	42.57	-2.62	125873	PASS	Spain_C		Neolithic_Europe_pooled
I2473	M	Spain_C	2861	2916-2704calBCE(4250±30BP,Beta-299305)	Spain	42.57	-2.62	153734	PASS	Spain_C		Neolithic_Europe_pooled
I3269	M	Spain_C	2900	3000-2800BCE	Spain	42.63	-2.7	669669	PASS(damage.ds.half=0.042)	Spain_C		Neolithic_Europe_pooled
I3270	F	Spain_C	2900	3000-2800BCE	Spain	42.63	-2.7	276804	PASS	Spain_C		Neolithic_Europe_pooled
I3271	F	Spain_C	2900	3000-2800BCE	Spain	42.63	-2.7	320283	PASS	Spain_C		Neolithic_Europe_pooled
I3272	M	Spain_C	3009	3307-2899calBCE(4380±40BP,Beta-288933)	Spain	42.57	-2.55	180360	PASS	Spain_C		Neolithic_Europe_pooled
I3277	F	Spain_C	3000	3150-2850BCE	Spain	42.57	-2.57	115023	PASS	Spain_C		Neolithic_Europe_pooled
I4247	F	Spain_C	2352	2462-2209calBCE(3870±30BP,PSUAMS-2120)	Spain	40.426	-3.535	188194	PASS	Spain_C		Neolithic_Europe_pooled
I4565	M	Spain_C	2965	3022-2907calBCE(4355±20BP,PSUAMS-2866)	Spain	41.2916	1.0638	680128	PASS(damage.ds.half=0.049)	Spain_C		Neolithic_Europe_pooled
I5838	M	Spain_C	2600	2900-2300BCE	Spain	42.3333	-3.5	712753	PASS	Spain_C		Neolithic_Europe_pooled
I6475	F	Spain_C	2250	2500-2000BCE	Spain	40.4903	-3.37389	51993	PASS	Spain_C		Neolithic_Europe_pooled
I6543	M	Spain_C	2150	2600-1700BCE	Spain	40.439	-3.501	105188	PASS	Spain_C		Neolithic_Europe_pooled
I6584	F	Spain_C	2250	2500-2000BCE	Spain	40.22	-3.76	164666	PASS	Spain_C		Neolithic_Europe_pooled
I6587	M	Spain_C	2250	2500-2000BCE	Spain	40.22	-3.76	136719	PASS	Spain_C		Neolithic_Europe_pooled
I6604	M	Spain_C	1997	2130-1896calBCE(3630±30BP,Ua-35012)	Spain	40.439	-3.501	199505	PASS	Spain_C		Neolithic_Europe_pooled
I6609	F	Spain_C	2150	2600-1700BCE	Spain	40.439	-3.501	264115	PASS	Spain_C		Neolithic_Europe_pooled
I6612	F	Spain_C	2150	2600-1700BCE	Spain	40.439	-3.501	47806	PASS	Spain_C		Neolithic_Europe_pooled
I6617	M	Spain_C	2600	2900-2300BCE	Spain	40.22	-3.76	374793	PASS	Spain_C		Neolithic_Europe_pooled
I6622	M	Spain_C	2150	2600-1700BCE	Spain	40.439	-3.501	52550	PASS(mtmatchmax=0.957-0.999)	Spain_C		Neolithic_Europe_pooled
I6628	F	Spain_C	2600	2900-2300BCE	Spain	40.22	-3.76	112781	PASS	Spain_C		Neolithic_Europe_pooled
I6629	M	Spain_C	2600	2900-2300BCE	Spain	40.22	-3.76	34797	PASS	Spain_C		Neolithic_Europe_pooled
I6630	F	Spain_C	2600	2900-2300BCE	Spain	40.22	-3.76	47746	PASS	Spain_C		Neolithic_Europe_pooled
I7587	M	Spain_C	2700	2900-2500BCE	Spain	37.24	-4.24	52839	PASS	Spain_C		Neolithic_Europe_pooled
I8048	M	Spain_C	2100	2200-2000BCE	Spain	37.005	-3.8947	83801	PASS	Spain_C		Neolithic_Europe_pooled
I8131	F	Spain_C	2509	2576-2356calBCE(3980±30BP,Beta-504712)	Spain	38.9777	-0.16037	107716	PASS	Spain_C		Neolithic_Europe_pooled
I8148	M	Spain_C	2700	2900-2500BCE	Spain	37.24	-4.24	22030	PASS	Spain_C		Neolithic_Europe_pooled
I8149	F	Spain_C	2700	2900-2500BCE	Spain	37.24	-4.24	76324	PASS(mtcontam=[0.943,0.973])	Spain_C		Neolithic_Europe_pooled
I8153	M	Spain_C	2700	2900-2500BCE	Spain	37.24	-4.24	22871	PASS	Spain_C		Neolithic_Europe_pooled
I8154	F	Spain_C	2700	2900-2500BCE	Spain	37.24	-4.24	89872	PASS	Spain_C		Neolithic_Europe_pooled
I8156	M	Spain_C	2700	2900-2500BCE	Spain	37.24	-4.24	30912	PASS	Spain_C		Neolithic_Europe_pooled
I8158	M	Spain_C	2700	2900-2500BCE	Spain	37.24	-4.24	44833	PASS	Spain_C		Neolithic_Europe_pooled
I8197	F	Spain_C	2700	2900-2500BCE	Spain	37.24	-4.24	843473	PASS	Spain_C		Neolithic_Europe_pooled
I8198	F	Spain_C	2700	2900-2500BCE	Spain	37.24	-4.24	673223	PASS	Spain_C		Neolithic_Europe_pooled
I8199	M	Spain_C	2700	2900-2500BCE	Spain	37.24	-4.24	844129	PASS	Spain_C		Neolithic_Europe_pooled
I8364	M	Spain_C	2638	2706-2569BCE	Spain	37.24	-4.24	807822	PASS(Xcontam=[0.006,0.012])	Spain_C		Neolithic_Europe_pooled
I8365	M	Spain_C	2638	2706-2569BCE	Spain	37.24	-4.24	886223	PASS	Spain_C		Neolithic_Europe_pooled
I8569	M	Spain_C	2742	2872-2626calBCE(4141±21BP,MAMS-18651)	Spain	40.3028	0.2797	607128	PASS	Spain_C		Neolithic_Europe_pooled
I0581_published_d	M	Spain_C_published	2796	2900-2675calBCE(4210±30BP,Beta-416455)	Spain	42.3333	-3.5	159361	PASS(literature)	Spain_C_published
I3276_published	M	Spain_C_published	3005	3096-2913calBCE(4390±30BP,Beta-301225)	Spain	42.57	-2.57	726934	PASS	Spain_C_published
I6542_published	M	Spain_C_published	2150	2600-1700BCE	Spain	40.439	-3.501	162147	PASS(literature)	Spain_C_published
I6596_published	M	Spain_C_published	2600	2900-2300BCE	Spain	40.22	-3.76	38024	PASS	Spain_C_published
I6608_published	M	Spain_C_published	1890	2025-1752calBCE(3555±40BP,Ua-35022)	Spain	40.439	-3.501	114220	PASS(literature)	Spain_C_published
I8140_published_d	F	Spain_C_published	1945	2121-1777calBCE(3590±40BP,Beta-230003)	Spain	37.1366	-3.5483	23654	PASS	Spain_C_published
atp016.SG	F	Spain_C.SG	3021	3265-2913calBCE(4400±30BP,Beta-368289)	Spain	42.3527	-3.51832	1150106	PASS(literature)	Spain_C.SG		Neolithic_Europe_pooled
atp12-1420.SG	M	Spain_C.SG	2918	3011-2881calBCE(4300±30BP,Beta-368295)	Spain	42.3527	-3.51832	1044624	PASS(literature)	Spain_C.SG		Neolithic_Europe_pooled
ATP17.SG	M	Spain_C.SG	2899	3008-2783calBCE(4280±30BP,Beta-368290)	Spain	42.3525	-3.51833	38517	PASS	Spain_C.SG		Neolithic_Europe_pooled
ATP20.SG	F	Spain_C.SG	2188	2291-2047calBCE(3770±30BP,Beta-368293)	Spain	42.3525	-3.51833	19084	PASS	Spain_C.SG		Neolithic_Europe_pooled
por002.SG	M	Spain_C.SG	3161	3336-2937calBCE(4450±30BP,Beta-424645)	Spain	42.3527	-3.51832	597223	PASS(literature)	Spain_C.SG		Neolithic_Europe_pooled
por004.SG	M	Spain_C.SG	3005	3096-2913calBCE(4390±30BP,Beta-424647)	Spain	42.3527	-3.51832	129402	PASS(literature)	Spain_C.SG		Neolithic_Europe_pooled
I12809	M	Spain_EBA	1825	1880-1770BCE	Spain	38.5781	-2.8417	53575	PASS	Spain_EBA
I12855	M	Spain_EBA	1825	1880-1770BCE	Spain	38.5781	-2.8417	24254	PASS	Spain_EBA
I1310	F	Spain_EBA	1700	2000-1400BCE	Spain	41.5373	2.1329	414591	PASS	Spain_EBA
I1312_d	M	Spain_EBA	1700	2000-1400BCE	Spain	41.5373	2.1329	157827	PASS	Spain_EBA
I1313_d	F	Spain_EBA	1700	2000-1400BCE	Spain	41.5373	2.1329	306462	PASS	Spain_EBA
I1836	M	Spain_EBA	1577	1684-1503calBCE(3310±35BP,Poz-83482)	Spain	41.223	1.7742	289553	PASS(mtcontam=[0.945,0.97])	Spain_EBA
I1840	M	Spain_EBA	1525	1613-1450calBCE(3260±30BP,Beta-299302)	Spain	42.57	-2.62	661465	PASS(damage.ds.half=0.048)	Spain_EBA
I1977	F	Spain_EBA	1525	1613-1450calBCE(3260±30BP,Beta-299312)	Spain	42.57	-2.62	116699	PASS	Spain_EBA
I2471	F	Spain_EBA	1550	1620-1462calBCE(3280±30BP,Beta-299311)	Spain	42.57	-2.62	197794	PASS	Spain_EBA
I3484	M	Spain_EBA	2124	2343-1905calBCE(3720±70BP,Rome-1687)	Spain	38.5781	-2.8417	69982	PASS	Spain_EBA
I3485	F	Spain_EBA	2100	2300-1900BCE	Spain	38.5781	-2.8417	460505	PASS	Spain_EBA
I3486	M	Spain_EBA	1625	1750-1500BCE	Spain	38.6314	-0.8615	45898	PASS	Spain_EBA
I3487	M	Spain_EBA	1653	1739-1546calBCE(3365±20BP,PSUAMS-2161)	Spain	38.6314	-0.8615	87652	PASS	Spain_EBA
I3488	M	Spain_EBA	1625	1750-1500BCE	Spain	38.6314	-0.8615	81914	PASS	Spain_EBA
I3490	F	Spain_EBA	1500	1850-1150BCE	Spain	41.7412	-3.8744	212012	PASS	Spain_EBA
I3491	F	Spain_EBA	1500	1850-1150BCE	Spain	41.6565	-4.6695	90484	PASS	Spain_EBA
I3492	M	Spain_EBA	1500	1850-1150BCE	Spain	40.8586	-5.3518	137831	PASS	Spain_EBA
I3494	M	Spain_EBA	1831	1928-1747calBCE(3515±30BP,CNA-1661.1.1)	Spain	38.8494	-0.87138	698862	PASS(Xcontam=[0.005,0.015])	Spain_EBA
I3756	M	Spain_EBA	1910	2017-1778calBCE(3565±25BP,PSUAMS-2077)	Spain	38.5781	-2.8417	604170	PASS	Spain_EBA
I3997	M	Spain_EBA	1692	1874-1544calBCE(3400±40BP,Beta-195318)	Spain	39.5268	-0.509749	979277	PASS(Xcontam=[0.005,0.016])	Spain_EBA
I4559	M	Spain_EBA	1600	1700-1500BCE	Spain	41.2916	1.0638	358175	PASS	Spain_EBA
I4560	F	Spain_EBA	1600	1700-1500BCE	Spain	41.2916	1.0638	871169	PASS	Spain_EBA
I4561	F	Spain_EBA	1600	1700-1500BCE	Spain	41.2916	1.0638	894637	PASS	Spain_EBA
I4562	F	Spain_EBA	1664	1741-1613calBCE(3375±20BP,PSUAMS-3191)	Spain	41.2916	1.0638	714863	PASS	Spain_EBA
I6470	M	Spain_EBA	1659	1746-1540calBCE(3375±35BP,Poz-49177)	Spain	42.7251	3.84239	687251	PASS	Spain_EBA
I6618	M	Spain_EBA	1785	1880-1691calBCE(3458±24BP,MAMS-32475)	Spain	40.22	-3.76	491332	PASS	Spain_EBA
I8136	F	Spain_EBA	1476	1534-1422calBCE(3216±33BP,Ua-39408)	Spain	37.7263	-2.5141	580533	PASS	Spain_EBA
I8144	F	Spain_EBA	1730	1876-1622calBCE(3426±34BP,Ua-39403)	Spain	37.7263	-2.5141	106105	PASS	Spain_EBA
VAD001	M	Spain_EBA	1691	1872-1547calBCE(3400±35BP,Ua-36345)	Spain	42.44	-2.8867	570346	PASS	Spain_EBA
VAD002	M	Spain_EBA	1700	1900-1500BCE	Spain	42.44	-2.8867	96050	PASS	Spain_EBA
VAD003	F	Spain_EBA	1700	1900-1500BCE	Spain	42.44	-2.8867	33922	PASS	Spain_EBA
VAD004	M	Spain_EBA	1700	1900-1500BCE	Spain	42.44	-2.8867	280199	PASS	Spain_EBA
VAD005	M	Spain_EBA	1640	1740-1539calBCE(3360±30BP,Beta-479535)	Spain	42.44	-2.8867	391791	PASS	Spain_EBA
I4329	F	Spain_EBA_Mallorca	2383	2468-2294calBCE(3900±30BP,KIA-30020)	Spain	39.505	3.30198	270140	PASS	Spain_EBA_Mallorca
ElMiron_d	F	Spain_ElMiron	16825	16898-16747calBCE(15460±40BP,MAMS-14585)	Spain	43.26	-3.45	627275	PASS	Spain_ElMiron
CHA001_merged	M	Spain_EN	5177	5308-5051calBCE(6230±45BP,GrA-26912)	Spain	42.2151	-0.138457	340922	PASS(literature)	Spain_EN		Neolithic_Europe_pooled
CHA002_merged	M	Spain_EN	5177	5302-5061calBCE(6227±28BP,MAMS-29127)	Spain	42.2151	-0.138457	142913	PASS(literature)	Spain_EN		Neolithic_Europe_pooled
CHA003_merged	M	Spain_EN	5125	5302-4991calBCE(6180±54BP,D-AMS-015821)	Spain	42.2151	-0.138457	378467	PASS(literature)	Spain_EN		Neolithic_Europe_pooled
CHA004.A0102	F	Spain_EN	4470	4545-4367calBCE(5645±31BP,MAMS-28128)	Spain	42.2151	-0.138457	64546	PASS(literature)	Spain_EN		Neolithic_Europe_pooled
FUC003_merged	M	Spain_EN	5069	5209-4947calBCE(6120±30BP,UGA-7565)	Spain	42.3856	-3.73489	437381	PASS(literature)	Spain_EN		Neolithic_Europe_pooled
I0409	F	Spain_EN	5260	5312-5212calBCE(6280±25BP,MAMS-16159)	Spain	42.5	0.5	511453	PASS	Spain_EN		Neolithic_Europe_pooled
I0410	M	Spain_EN	5156	5298-5057calBCE(6217±25BP,MAMS-16161)	Spain	42.5	0.5	521870	PASS	Spain_EN		Neolithic_Europe_pooled
I0412	M	Spain_EN	5227	5309-5073calBCE(6249±28BP,MAMS-16164)	Spain	42.5	0.5	983710	PASS(Xcontam=0.005)	Spain_EN		Neolithic_Europe_pooled
I0413	F	Spain_EN	5193	5304-5065calBCE(6234±28BP,MAMS-16166)	Spain	42.5	0.5	638681	PASS	Spain_EN		Neolithic_Europe_pooled
I1972	F	Spain_EN	4753	4836-4687calBCE(5880±30BP,Beta-366569)	Spain	42.6282	-3.11649	363549	PASS	Spain_EN		Neolithic_Europe_pooled
I2199	F	Spain_EN	5119	5214-5015calBCE(6170±30BP,Beta-438208)	Spain	42.6282	-3.11649	323000	PASS	Spain_EN		Neolithic_Europe_pooled
atp005.SG	M	Spain_EN.SG	5119	5214-5015calBCE(6170±30BP,Beta-368283)	Spain	42.3527	-3.51832	77694	PASS(literature)	Spain_EN.SG		Neolithic_Europe_pooled
CB13.SG	F	Spain_EN.SG	5395	5474-5318calBCE(6410±30BP,Beta-384724)	Spain	41.37	1.89	717337	PASS	Spain_EN.SG		Neolithic_Europe_pooled
mur.SG	M	Spain_EN.SG	5177	5299-5066calBCE(6226±20BP,wk-40844)	Spain	37.5422	-4.30388	1078491	PASS(literature)	Spain_EN.SG		Neolithic_Europe_pooled
TOR.6.SG	F	Spain_EN.SG	4950	5100-4800BCE	Spain	..	..	184336	PASS(literature)	Spain_EN.SG		Neolithic_Europe_pooled
TOR.8.SG	F	Spain_EN.SG	4950	5100-4800BCE	Spain	..	..	97251	PASS(literature)	Spain_EN.SG		Neolithic_Europe_pooled
I0585	M	Spain_HG	5861	5982-5741calBCE(6980±50BP,Beta-226472)	Spain	42.911	-5.3778	976082	PASS(Xcontam=0.004)	Spain_HG
LaBrana1_published.SG	M	Spain_HG_published.SG	5861	5982-5741calBCE(6980±50BP,Beta-226472)	Spain	42.911	-5.3778	1079840	PASS(literature)	Spain_HG_published.SG
Chan.SG	F	Spain_HG.SG	7159	7320-7054calBCE(8155±42BP,Ua-13398/Ua-38115)	Spain	42.7344	-7.03054	1036284	PASS(literature)	Spain_HG.SG
I8570	M	Spain_LBA	1150	1300-1000BCE	Spain	40.1391	0.1054	236532	PASS	Spain_LBA		Spain_BA_merged
I8571_d	M	Spain_LBA	1400	1800-1000BCE	Spain	40.1425	0.109167	18847	PASS	Spain_LBA		Spain_BA_merged
I2469_published	F	Spain_LBA_published	876	971-813calBCE(2740±30BP,Beta-299308)	Spain	42.57	-2.62	92984	PASS	Spain_LBA_published
I8571_published	M	Spain_LBA_published	1400	1800-1000BCE	Spain	40.1391	0.1054	36813	PASS(damage.ss.half=0.047)	Spain_LBA_published
c40331.SG	M	Spain_LN.SG	3680	3765-3636calBCE(4900±30BP,Beta-424648)	Spain	37.455	-4.33238	235515	PASS(literature)	Spain_LN.SG		Neolithic_Europe_pooled
san216.SG	M	Spain_LN.SG	3707	3779-3647calBCE(4940±30BP,Beta-424654)	Spain	42.3171	0.364418	161245	PASS(literature)	Spain_LN.SG		Neolithic_Europe_pooled
I12208	F	Spain_MBA	1300	1400-1200BCE	Spain	41.4584	-5.2872	860198	PASS	Spain_MBA		Spain_BA_merged
I12209	M	Spain_MBA	1300	1400-1200BCE	Spain	41.4584	-5.2872	899574	PASS	Spain_MBA		Spain_BA_merged
I2472	M	Spain_MBA	1478	1533-1427calBCE(3220±30BP,Beta-299309)	Spain	42.57	-2.62	145526	PASS	Spain_MBA		Spain_BA_merged
I3493	F	Spain_MBA	1351	1422-1281calBCE(3090±25BP,PSUAMS-2072)	Spain	40.8586	-5.3518	288946	PASS	Spain_MBA		Spain_BA_merged
I4420_all	F	Spain_MBA_Formentera_all	1798	1879-1697BCE(3466±16BP)[R_combine:(3454±26BP,D-AMS018425);(3473±20BP,MAMS-22647)]	Spain	38.6866	1.42121	754945	PASS	Spain_MBA_Formentera_all
I2470_published	M	Spain_MBA_published	1325	1412-1227calBCE(3060±30BP,Beta-299307)	Spain	42.57	-2.62	408097	PASS	Spain_MBA_published
ELT002_merged	M	Spain_MLN	3803	3941-3660calBCE(5008±23BP,MAMS-16160)	Spain	42.5	0.5	831758	PASS(literature)	Spain_MLN
ELT006_merged	M	Spain_MLN	3859	3949-3715calBCE(5035±23BP,MAMS-16165)	Spain	42.5	0.5	716426	PASS(literature)	Spain_MLN
I0405	M	Spain_MLN	3750	3900-3600BCE	Spain	41.2522	-2.32622	321750	PASS	Spain_MLN
I0406	M	Spain_MLN	3750	3900-3600BCE	Spain	41.2522	-2.32622	724111	PASS(Xcontam=0.009)	Spain_MLN
I0407	F	Spain_MLN	3750	3900-3600BCE	Spain	41.2522	-2.32622	552221	PASS	Spain_MLN
I10277	M	Spain_MLN	2950	3400-2500BCE	Spain	41.4391	1.5733	421166	PASS	Spain_MLN
I10278	M	Spain_MLN	2950	3400-2500BCE	Spain	41.4391	1.5733	397387	PASS(damage.ds.half=0.038)	Spain_MLN
I10280	M	Spain_MLN	2950	3400-2500BCE	Spain	41.4391	1.5733	310520	PASS	Spain_MLN
I10283	M	Spain_MLN	2950	3400-2500BCE	Spain	41.4391	1.5733	132283	PASS	Spain_MLN
I10284	M	Spain_MLN	2950	3400-2500BCE	Spain	41.4391	1.5733	114410	PASS	Spain_MLN
I10285	F	Spain_MLN	2950	3400-2500BCE	Spain	41.4391	1.5733	292840	PASS	Spain_MLN
I10286	M	Spain_MLN	2950	3400-2500BCE	Spain	41.4391	1.5733	36208	PASS	Spain_MLN
I11248	M	Spain_MLN	3100	3500-2700BCE	Spain	43.0866	-2.2154	829527	PASS(damage.ds.half=0.0415)	Spain_MLN
I11249	M	Spain_MLN	3100	3500-2700BCE	Spain	43.0866	-2.2154	727030	PASS(damage.ds.half=0.0435)	Spain_MLN
I11300	F	Spain_MLN	3100	3500-2700BCE	Spain	43.0866	-2.2154	62908	PASS	Spain_MLN
I11301	F	Spain_MLN	3100	3500-2700BCE	Spain	43.0866	-2.2154	521706	PASS	Spain_MLN
I11303	F	Spain_MLN	2950	3400-2500BCE	Spain	41.4391	1.5733	70137	PASS	Spain_MLN
I11305	M	Spain_MLN	2950	3400-2500BCE	Spain	41.4391	1.5733	497661	PASS(damage.ds.half=0.047)	Spain_MLN
I11306	F	Spain_MLN	2950	3400-2500BCE	Spain	41.4391	1.5733	426351	PASS(damage.ds.half=0.047)	Spain_MLN
I3214	M	Spain_MLN	3250	3400-3100BCE	Spain	43.4102	-5.98496	36188	PASS(mtmatchmax=0.963-1)	Spain_MLN
I7547	F	Spain_MLN	4000	4300-3700BCE	Spain	36.445	-6.21	65285	PASS(mtcontam=[0.942,0.976])	Spain_MLN
I7549	F	Spain_MLN	4000	4300-3700BCE	Spain	36.445	-6.21	264076	PASS	Spain_MLN
I7550	F	Spain_MLN	4150	4700-3600BCE	Spain	36.445	-6.21	638374	PASS	Spain_MLN
I7594	F	Spain_MLN	3440	3520-3360calBCE(MAMS-16356)	Spain	38.7025	-0.48631	173731	PASS	Spain_MLN
I7598	M	Spain_MLN	3500	3630-3370calBCE(MAMS-16346)	Spain	38.7025	-0.48631	385031	PASS	Spain_MLN
I7600	F	Spain_MLN	3675	4000-3350BCE	Spain	38.7025	-0.48631	318896	PASS	Spain_MLN
I7601	M	Spain_MLN	3590	3660-3520calBCE(MAMS-16354)	Spain	38.7025	-0.48631	174720	PASS	Spain_MLN
I7602	M	Spain_MLN	3100	3500-2700BCE	Spain	43.0858	-2.2512	618920	PASS	Spain_MLN
I7603	M	Spain_MLN	3100	3500-2700BCE	Spain	43.0858	-2.2512	563473	PASS	Spain_MLN
I7604	M	Spain_MLN	3100	3500-2700BCE	Spain	43.0858	-2.2512	698628	PASS(Xcontam=[0.007,0.02])	Spain_MLN
I7605	M	Spain_MLN	3100	3500-2700BCE	Spain	43.0858	-2.2512	378078	PASS	Spain_MLN
I7606	M	Spain_MLN	3100	3500-2700BCE	Spain	43.0858	-2.2512	831931	PASS	Spain_MLN
I7642	M	Spain_MLN	2834	2907-2761calBCE(MAMS-16338)	Spain	38.7025	-0.48631	620981	PASS	Spain_MLN
I7643	M	Spain_MLN	3835	3960-3710calBCE(MAMS-16344)	Spain	38.7025	-0.48631	152222	PASS	Spain_MLN
I7644	M	Spain_MLN	3510	3640-3380calBCE(MAMS-16353)	Spain	38.7025	-0.48631	343965	PASS	Spain_MLN
I7645	M	Spain_MLN	3770	3990-3550calBCE(MAMS-16340)	Spain	38.7025	-0.48631	33669	PASS(mtcontam=[0.933,0.975])	Spain_MLN
I7646	F	Spain_MLN	3670	3710-3630calBCE(MAMS-16339)	Spain	38.7025	-0.48631	135922	PASS	Spain_MLN
I7647	M	Spain_MLN	3695	4050-3340calBCE(MAMS-16335)	Spain	38.7025	-0.48631	23864	PASS(damage.ds.half=0.041,mtcontam=[0.94,0.967])	Spain_MLN
I8134	F	Spain_MLN	4150	4700-3600BCE	Spain	36.445	-6.21	663508	PASS	Spain_MLN
I8567	M	Spain_MLN	3400	3500-3300BCE	Spain	38.7623	-0.586981	159270	PASS	Spain_MLN
I8568	F	Spain_MLN	3437	3496-3355calBCE(4615±20BP,PSUAMS-4432)	Spain	38.7623	-0.586981	418579	PASS(damage.ds.half=0.038)	Spain_MLN
I10287_published	M	Spain_MLN_published	2950	3400-2500BCE	Spain	41.4391	1.5733	597074	PASS	Spain_MLN_published
I11304_published	M	Spain_MLN_published	2950	3400-2500BCE	Spain	41.4391	1.5733	68113	PASS	Spain_MLN_published
I3273_published	F	Spain_MLN_published	3453	3606-3363calBCE(4670±40BP,Beta-288935)	Spain	42.57	-2.55	129454	PASS	Spain_MLN_published
I7679_published	F	Spain_MLN_published	4000	4300-3700BCE	Spain	36.445	-6.21	35201	PASS	Spain_MLN_published
LD1174.SG	F	Spain_MN.SG	2516	2578-2459calBCE(3989±30BP,Beta-441391)	Spain	37.4061	-4.41639	913135	PASS(literature)	Spain_MN.SG		Neolithic_Europe_pooled
BAL003.A0101	M	Spain_UP_Azilian	9958	10727-9272calBCE(10195±255BP,Ua-34298)	Spain	42.0853	1.60168	19549	PASS(literature)	Spain_UP_Azilian
BAL051_merged	M	Spain_UP_Azilian	11065	11446-10772calBCE(11095±195BP,Ua-34297)	Spain	42.0853	1.60168	335886	PASS(literature)	Spain_UP_Azilian
ans003.SG	F	Sweden_Ansarve_Megalithic.SG	3332	3525-3097calBCE(4595±65BP,Ua-3783;4560±30BP,Beta-432256)	Sweden	57.509	18.14	111450	PASS(literature)	Sweden_Ansarve_Megalithic.SG
ans005.SG	F	Sweden_Ansarve_Megalithic.SG	3417	3500-3130calBCE(4640±70BP,Ua-3785;4580±30BP,Beta-432257)	Sweden	57.509	18.14	91661	PASS(literature)	Sweden_Ansarve_Megalithic.SG
ans008.SG	M	Sweden_Ansarve_Megalithic.SG	3204	3342-3031calBCE(4480±31BP,Ua-45398)	Sweden	57.509	18.14	878569	PASS(literature)	Sweden_Ansarve_Megalithic.SG
ans014.SG	M	Sweden_Ansarve_Megalithic.SG	3161	3336-2937calBCE(4450±30BP,Beta-402962)	Sweden	57.509	18.14	930508	PASS(literature)	Sweden_Ansarve_Megalithic.SG
ans016.SG	M	Sweden_Ansarve_Megalithic.SG	2755	2879-2631calBCE(4160±30BP,Beta-402963)	Sweden	57.509	18.14	148525	PASS(literature)	Sweden_Ansarve_Megalithic.SG
ans017.SG	M	Sweden_Ansarve_Megalithic.SG	3103	3328-2924calBCE(4430±30BP,Beta-402965)	Sweden	57.509	18.14	1109883	PASS(literature)	Sweden_Ansarve_Megalithic.SG
RISE175.SG	M	Sweden_BA.SG	1283	1396-1131calBCE(3025±30BP,OxA-28998)	Sweden	55.397	13.6	111000	PASS(literature)	Sweden_BA.SG
RISE207.SG	M	Sweden_BA.SG	1394	1495-1301calBCE(3130±27BP,OxA-29651)	Sweden	55.997	14.104	19669	PASS(literature)	Sweden_BA.SG
RISE210.SG	F	Sweden_BA.SG	1362	1436-1286calBCE(3105±28BP,OxA-29654)	Sweden	55.997	14.104	50468	PASS(literature)	Sweden_BA.SG
ber1M.SG	M	Sweden_BAC.SG	2533	2622-2467calBCE(4020±30BP,Beta-423305)	Sweden	58.4158	15.6253	987701	PASS(literature)	Sweden_BAC.SG
ber2F.SG	F	Sweden_BAC.SG	2542	2625-2469calBCE(4030±30BP,Beta-423306)	Sweden	58.4158	15.6253	233422	PASS(literature)	Sweden_BAC.SG
oll007.SG	F	Sweden_BAC.SG	2667	2859-2497calBCE(4090±30BP,Beta-417630)	Sweden	56.0147	14.068	669883	PASS(literature)	Sweden_BAC.SG
RISE94.SG	M	Sweden_BattleAxe.SG	2537	2623-2468calBCE(4025±30BP,OxA-29033)	Sweden	56.025	14.233	607380	PASS(literature)	Sweden_BattleAxe.SG
StoraForvar11.SG	M	Sweden_HG.SG	5415	5557-5230calBCE(6459±70BP,Ua-45742)	Sweden	57.285	17.971	103086	PASS(literature)	Sweden_HG.SG		WHG_pooled
oll009.SG	M	Sweden_Late_N.SG	1837	1931-1749calBCE(3520±30BP,Beta-417631)	Sweden	56.0147	14.068	390640	PASS(literature)	Sweden_Late_N.SG
oll010.SG	F	Sweden_Late_N.SG	1754	1879-1632calBCE(3440±30BP,Beta-417632)	Sweden	56.0147	14.068	132466	PASS(literature)	Sweden_Late_N.SG
RISE179.SG	M	Sweden_LN.SG	1893	2015-1774calBCE(3556±28BP,OxA-29193)	Sweden	55.397	13.6	50109	PASS(literature)	Sweden_LN.SG
RISE97.SG	F	Sweden_LN.SG	1945	2030-1830calBCE(3590±29BP,OxA-28986)	Sweden	55.557	13.059	561162	PASS(literature)	Sweden_LN.SG
RISE98.SG	M	Sweden_LN.SG	2132	2278-2032calBCE(3736±32BP,OxA-28987)	Sweden	55.381	13.445	1089349	PASS(literature)	Sweden_LN.SG
Olsund	M	Sweden_LNBA	2356	2573-2140calBCE	Sweden	61.658	17.004	699257	PASS(literature)	Sweden_LNBA
SBj.SG	M	Sweden_Mesolithic.SG	6821	7013-6629calBCE	Sweden	57.792	18.538	342434	PASS(literature)	Sweden_Mesolithic.SG
SF12.SG	F	Sweden_Mesolithic.SG	6945	7083-6807calBCE	Sweden	57.285	17.971	1116314	PASS(literature)	Sweden_Mesolithic.SG
SF9.SG	F	Sweden_Mesolithic.SG	7194	7350-7038calBCE	Sweden	57.285	17.971	813050	PASS(literature)	Sweden_Mesolithic.SG
I0011	F	Sweden_Motala_HG	5614	5721-5484calBCE(6701±64BP,Ua-42116)	Sweden	58.535	15.046	621320	PASS	Sweden_Motala_HG
I0012	M	Sweden_Motala_HG	5648	5715-5569calBCE(6734±30BP,Ua-51722)	Sweden	58.535	15.046	787312	PASS(Xcontam=0.004)	Sweden_Motala_HG
I0014	F	Sweden_Motala_HG	5736	5885-5624calBCE(6842±68BP,Ua-42118)	Sweden	58.535	15.046	739313	PASS	Sweden_Motala_HG
I0015	M	Sweden_Motala_HG	5760	5967-5627calBCE(6863±75BP,Ua-42120)	Sweden	58.535	15.046	600144	PASS	Sweden_Motala_HG
I0017	M	Sweden_Motala_HG	5674	5722-5628calBCE(6773±30BP,Ua-51723)	Sweden	58.535	15.046	920441	PASS(Xcontam=0.004)	Sweden_Motala_HG
MotalaAA	F	Sweden_Motala_HG	5649	5724-5563calBCE(6735±44BP,Ua-42645)	Sweden	58.535	15.046	56448	PASS(literature)	Sweden_Motala_HG
I0017.SG	M	Sweden_Motala_HG.SG	5674	5722-5628calBCE(6773±30BP,Ua-51723)	Sweden	58.535	15.046	1046565	PASS(literature)	Sweden_Motala_HG.SG
ajv54.SG	M	Sweden_PWC.SG	2899	3008-2783calBCE(4280±30BP,Beta-423308)	Sweden	57.2811	18.1691	419024	PASS(literature)	Sweden_PWC.SG
Ajvide52.SG	M	Sweden_PWC.SG	2750	2900-2600BCE	Sweden	57.287	18.206	108357	PASS(literature)	Sweden_PWC.SG
Ajvide53.SG	F	Sweden_PWC.SG	2750	2900-2600BCE	Sweden	57.287	18.206	29365	PASS(literature)	Sweden_PWC.SG
Ajvide58.SG	M	Sweden_PWC.SG	2750	2900-2600BCE	Sweden	57.287	18.206	1043030	PASS(literature)	Sweden_PWC.SG
Ajvide70.SG	M	Sweden_PWC.SG	2750	2900-2600BCE	Sweden	57.287	18.206	181989	PASS(literature)	Sweden_PWC.SG
Kvarlov5164	F	Sweden_TRB_MN	3796	3945-3647calBCE	Sweden	61.6585	17.0037	374093	PASS(literature)	Sweden_TRB_MN		Neolithic_Europe_pooled
Gokhem2.SG	F	Sweden_TRB_MN.SG	2978	3086-2907calBCE(4368±27BP,UBA-14087)	Sweden	58.174	13.408	739545	PASS(literature)	Sweden_TRB_MN.SG		Neolithic_Europe_pooled
Gokhem4.SG	M	Sweden_TRB_MN.SG	2974	3092-2887calBCE(4341±44BP,AA-R-10235)	Sweden	58.174	13.408	38838	PASS(literature)	Sweden_TRB_MN.SG		Neolithic_Europe_pooled
Gokhem5.SG	F	Sweden_TRB_MN.SG	3134	3331-2930calBCE(4440±30BP,Beta-368294)	Sweden	58.174	13.408	22806	PASS(literature)	Sweden_TRB_MN.SG		Neolithic_Europe_pooled
I5755	M	Switzerland_BellBeaker	2225	2500-1950BCE	Switzerland	46.2317	7.35124	119998	PASS	Switzerland_BellBeaker
I5757	M	Switzerland_BellBeaker	2225	2500-1950BCE	Switzerland	46.2317	7.35124	74999	PASS	Switzerland_BellBeaker
I5759	F	Switzerland_BellBeaker	2225	2500-1950BCE	Switzerland	46.2317	7.35124	121137	PASS	Switzerland_BellBeaker
MX193	F	Switzerland_EBA_1	2137	2283-2030calBCE(3738±37BP,BE-7446.1.1)	Switzerland	47.255	8.2158	524524	PASS	Switzerland_EBA_1
RA54	F	Switzerland_EBA_1	2548	2660-2468calBCE(4035±30BP, ETH-44203)	Switzerland	47.1936	8.122	123020	PASS	Switzerland_EBA_1
TU904(SX17)	F	Switzerland_EBA_1	2394	2467-2302calBCE(3906±21BP,BE-8017.1.1)	Switzerland	47.45	9.292	190194	PASS	Switzerland_EBA_1
TU876(SX10)	F	Switzerland_EBA_1	2600	2750-2450BCE	Switzerland	47.2266	8.81844	403366	PASS	Switzerland_EBA_1
TU908(SX21)	F	Switzerland_EBA_1	2377	2461-2295calBCE(3885±21BP,BE-8012.1.1)	Switzerland	47.45	9.292	575318	PASS	Switzerland_EBA_1
TU910(SX22)	F	Switzerland_EBA_1	2999	3092-2920calBCE(4394±21BP,BE-8013.1.1)	Switzerland	47.45	9.292	538862	PASS	Switzerland_EBA_1
TU914(SX26)	F	Switzerland_EBA_1	2372	2461-2291calBCE(3880±21BP,BE-8019.1.1)	Switzerland	47.45	9.292	473395	PASS	Switzerland_EBA_1
MX188	M	Switzerland_EBA_2	2449	2566-2345calBCE(3947±21BP,BE-7995.1.1)	Switzerland	47.255	8.2158	653999	PASS	Switzerland_EBA_2
MX189	F	Switzerland_EBA_2	2108	2199-2035calBCE(3721±20BP,BE-7986.1.1)	Switzerland	47.255	8.2158	505361	PASS	Switzerland_EBA_2
MX191	M	Switzerland_EBA_2	2573	2837-2472calBCE(4050±30BP, ETH-44196.2)	Switzerland	47.255	8.2158	613577	PASS	Switzerland_EBA_2
MX196	F	Switzerland_EBA_2	2545	2627-2470calBCE(4034±29BP, ETH-44195.1)	Switzerland	47.255	8.2158	571769	PASS	Switzerland_EBA_2
MX197	F	Switzerland_EBA_2	2401	2557-2293calBCE(3921±34BP,BE-7985.1.1)	Switzerland	47.255	8.2158	553262	PASS	Switzerland_EBA_2
MX198	F	Switzerland_EBA_2	2559	2861-2342calBCE(4015±65BP, ETH-17371)	Switzerland	47.255	8.2158	551547	PASS	Switzerland_EBA_2
MX199	F	Switzerland_EBA_2	2285	2454-2147calBCE(3829±35BP,BE-7998.1.1)	Switzerland	47.255	8.2158	601979	PASS	Switzerland_EBA_2
MX298	M	Switzerland_EBA_2	2511	2622-2349calBCE(3988±39BP,BE-8022.1.1)	Switzerland	47.45	9.292	18842	PASS	Switzerland_EBA_2
RA64	M	Switzerland_EBA_2	2149	2274-2041calBCE(3746±20BP,BE-7994.1.1)	Switzerland	47.5878	8.29332	481488	PASS	Switzerland_EBA_2
TU905(SX18)	F	Switzerland_EBA_2	82	172calBCE-12calCE(2071±33BP,BE-8016.1.1)	Switzerland	47.45	9.292	600119	PASS	Switzerland_EBA_2
TU907(SX20)	M	Switzerland_EBA_2	1626	1733-1542calBCE(3351±20BP,BE-8015.1.1)	Switzerland	47.45	9.292	634330	PASS	Switzerland_EBA_2
TU911(SX23)	F	Switzerland_EBA_2	1812	1882-1746calBCE(3487±20BP,BE-8018.1.1)	Switzerland	47.45	9.292	530918	PASS	Switzerland_EBA_2
Aes10	F	Switzerland_LN	2883	2912-2784calBCE(4256±23BP,BE-9179.1.1)	Switzerland	47.4654	7.60169	360088	PASS	Switzerland_LN
Aes13	M	Switzerland_LN	2952	3013-2900calBCE(4337±23BP,BE-9182.1.1)	Switzerland	47.4654	7.60169	537538	PASS	Switzerland_LN
Aes14	M	Switzerland_LN	2947	3012-2897calBCE(4332±23BP,BE-9183.1.1)	Switzerland	47.4654	7.60169	472696	PASS	Switzerland_LN
Aes16	F	Switzerland_LN	2992	3091-2916calBCE(4387±23BP,BE-9184.1.1)	Switzerland	47.4654	7.60169	169960	PASS	Switzerland_LN
Aes17	M	Switzerland_LN	2928	3011-2888calBCE(4316±24BP,BE-9185.1.1)	Switzerland	47.4654	7.60169	557118	PASS	Switzerland_LN
Aes18	F	Switzerland_LN	2888	2916-2786calBCE(4263±24BP,BE-9186.1.1)	Switzerland	47.4654	7.60169	608565	PASS	Switzerland_LN
Aes1	M	Switzerland_LN	2989	3090-2916calBCE(4385±23BP,BE-8673.1.1)	Switzerland	47.4654	7.60169	469049	PASS	Switzerland_LN
Aes20	M	Switzerland_LN	2892	2917-2876calBCE(4269±24BP,BE-9188.1.1)	Switzerland	47.4654	7.60169	535197	PASS	Switzerland_LN
Aes21	M	Switzerland_LN	2875	3100-2650BCE	Switzerland	47.4654	7.60169	538942	PASS	Switzerland_LN
Aes22	M	Switzerland_LN	2790	2892-2677calBCE(4199±23BP,BE-9190.1.1)	Switzerland	47.4654	7.60169	462688	PASS	Switzerland_LN
Aes23	M	Switzerland_LN	2772	2885-2669calBCE(4178±23BP,BE-9191.1.1)	Switzerland	47.4654	7.60169	592112	PASS	Switzerland_LN
Aes24	M	Switzerland_LN	2889	2915-2874calBCE(4264±23BP,BE-9192.1.1)	Switzerland	47.4654	7.60169	561041	PASS	Switzerland_LN
Aes2	F	Switzerland_LN	2935	3011-2892calBCE(4322±23BP,BE-9177.1.1)	Switzerland	47.4654	7.60169	333913	PASS	Switzerland_LN
Aes3	F	Switzerland_LN	2969	3075-2906calBCE(4359±23BP,BE-8674.1.1)	Switzerland	47.4654	7.60169	557698	PASS	Switzerland_LN
Aes4	M	Switzerland_LN	3020	3098-2921calBCE(4405±23BP,BE-8675.1.1)	Switzerland	47.4654	7.60169	517273	PASS	Switzerland_LN
Aes5	F	Switzerland_LN	2956	3016-2901calBCE(4341±23BP,BE-8676.1.1)	Switzerland	47.4654	7.60169	463753	PASS	Switzerland_LN
Aes8	F	Switzerland_LN	2901	2921-2881calBCE(4286±23BP,BE-9178.1.1)	Switzerland	47.4654	7.60169	477740	PASS	Switzerland_LN
Aes9	F	Switzerland_LN	2898	2917-2881calBCE(4280±23BP,BE-8679.1.1)	Switzerland	47.4654	7.60169	367780	PASS	Switzerland_LN
MX150	M	Switzerland_LN	3214	3350-3101calBCE(4508±23BP,BE-7999)	Switzerland	47.2621	7.65984	186510	PASS	Switzerland_LN
MX182	M	Switzerland_LN	3208	3341-3032calBCE(4480±27BP,MAMS-27569)	Switzerland	47.2621	7.65984	351236	PASS	Switzerland_LN
MX184	F	Switzerland_LN	3000	3400-2600BCE	Switzerland	47.2621	7.65984	408366	PASS	Switzerland_LN
MX203	F	Switzerland_LN	3000	3400-2600BCE	Switzerland	47.2621	7.65984	139872	PASS	Switzerland_LN
MX204	M	Switzerland_LN	3000	3400-2600BCE	Switzerland	47.2621	7.65984	336051	PASS	Switzerland_LN
MX209	M	Switzerland_LN	3000	3400-2600BCE	Switzerland	47.2621	7.65984	335476	PASS	Switzerland_LN
MX210	M	Switzerland_LN	3000	3400-2600BCE	Switzerland	47.2621	7.65984	649999	PASS	Switzerland_LN
MX211	M	Switzerland_LN	3042	3264-2923calBCE(4415±21BP,BE-8003.1.1)	Switzerland	47.2621	7.65984	502883	PASS	Switzerland_LN
MX212	M	Switzerland_LN	3215	3341-3095calBCE(4489±22BP,BE-10421.1.1)	Switzerland	47.2621	7.65984	341172	PASS	Switzerland_LN
MX213	M	Switzerland_LN	3175	3365-2928calBCE(4482±72BP,BE-5458.1.1)	Switzerland	47.2621	7.65984	407617	PASS	Switzerland_LN
RA42	F	Switzerland_LN	3215	3341-3098calBCE(4493±21BP,BE-8005.1.1)	Switzerland	47.2621	7.65984	150490	PASS	Switzerland_LN
RA43	F	Switzerland_LN	3172	3331-3019calBCE(4452±21BP,BE-8006.1.1)	Switzerland	47.2621	7.65984	33785	PASS	Switzerland_LN
RA44	F	Switzerland_LN	2878	2913-2779calBCE(4253±24BP,BE-8007.1.1)	Switzerland	47.2621	7.65984	189841	PASS	Switzerland_LN
RA45	F	Switzerland_LN	3025	3098-2924calBCE(4408±21BP,BE-8008.1.1)	Switzerland	47.2621	7.65984	191349	PASS	Switzerland_LN
RA57	F	Switzerland_LN	2856	2906-2706calBCE(4236±21BP,BE-7989.1.1)	Switzerland	47.3122	7.3843	385459	PASS	Switzerland_LN
RA58	M	Switzerland_LN	2915	3010-2884calBCE(4308±21BP,BE-7992.1.1)	Switzerland	47.3122	7.3843	332683	PASS	Switzerland_LN
RA59.Furtwangler	F	Switzerland_LN	2880	2898-2861calBCE	Switzerland	47.3122	7.3843	272324	PASS	Switzerland_LN
RA61	M	Switzerland_LN	2854	2906-2706calBCE(4235±21BP,BE-7988.1.1)	Switzerland	47.3122	7.3843	520717	PASS	Switzerland_LN
RA62	M	Switzerland_LN	2903	2923-2883calBCE(4293±21BP,BE-7990.1.1)	Switzerland	47.3122	7.3843	540054	PASS	Switzerland_LN
TU875(SX9)	F	Switzerland_LN	4388	4445-4341calBCE(5537±22BP,BE-7984.1.1)	Switzerland	47.0117	7.25054	503922	PASS	Switzerland_LN
TU877(SX11)	F	Switzerland_LN	4405	4455-4355calBCE(5587±22BP,BE-8011.1.1)	Switzerland	47.0117	7.25054	722899	PASS	Switzerland_LN
I4910	F	Tajikistan_C_Sarazm	3576	3634-3522calBCE(4765±20BP,PSUAMS-2624)	Tajikistan	39.5072	67.4608	783119	PASS	Tajikistan_C_Sarazm		Iran_N_pooled
I1583.DG	M	Turkey_N.DG	6323	6424-6233calBCE(7460±50BP,Poz-82231)	Turkey	40.3037	29.6085	1159219	PASS(Xcontam=[0.006,0.012])	Turkey_N.DG
I1583.SG	M	Turkey_N.SG	6323	6424-6233calBCE(7460±50BP,Poz-82231)	Turkey	40.3037	29.6085	1172838	PASS(Xcontam=[0.006,0.012])	Turkey_N.SG
I12478	F	Turkmenistan_C_Geoksyur	3100	3400-2800BCE	Turkmenistan	37.1907	61.0343	77744	PASS	Turkmenistan_C_Geoksyur		Iran_N_pooled
I12479	F	Turkmenistan_C_Geoksyur	3100	3400-2800BCE	Turkmenistan	37.1907	61.0343	80692	PASS(mtcontam=0.969)	Turkmenistan_C_Geoksyur		Iran_N_pooled
I12480	F	Turkmenistan_C_Geoksyur	3100	3400-2800BCE	Turkmenistan	37.1907	61.0343	477405	PASS	Turkmenistan_C_Geoksyur		Iran_N_pooled
I12481	M	Turkmenistan_C_Geoksyur	3100	3400-2800BCE	Turkmenistan	37.1907	61.0343	489463	PASS	Turkmenistan_C_Geoksyur		Iran_N_pooled
I12482	M	Turkmenistan_C_Geoksyur	3100	3400-2800BCE	Turkmenistan	37.1907	61.0343	235342	PASS	Turkmenistan_C_Geoksyur		Iran_N_pooled
I12483	F	Turkmenistan_C_Geoksyur	3100	3400-2800BCE	Turkmenistan	37.1907	61.0343	346633	PASS	Turkmenistan_C_Geoksyur		Iran_N_pooled
I12485	F	Turkmenistan_C_Geoksyur	3100	3400-2800BCE	Turkmenistan	37.1907	61.0343	758188	PASS	Turkmenistan_C_Geoksyur		Iran_N_pooled
I12486	U	Turkmenistan_C_Geoksyur	3100	3400-2800BCE	Turkmenistan	37.1907	61.0343	772457	PASS	Turkmenistan_C_Geoksyur		Iran_N_pooled
I12487	M	Turkmenistan_C_Geoksyur	3100	3400-2800BCE	Turkmenistan	37.1907	61.0343	436355	PASS	Turkmenistan_C_Geoksyur		Iran_N_pooled
I8503	F	Turkmenistan_C_Geoksyur	3100	3400-2800BCE	Turkmenistan	37.1907	61.0343	148535	PASS	Turkmenistan_C_Geoksyur		Iran_N_pooled
I8504	M	Turkmenistan_C_Geoksyur	3013	3096-2919calBCE(4400±25BP,PSUAMS-3986)	Turkmenistan	37.1907	61.0343	364312	PASS	Turkmenistan_C_Geoksyur		Iran_N_pooled
I8510	F	Turkmenistan_C_Geoksyur	3213	3346-3092calBCE(4490±25BP,PSUAMS-3987)	Turkmenistan	37.1907	61.0343	343931	PASS	Turkmenistan_C_Geoksyur		Iran_N_pooled
I8524	M	Turkmenistan_C_Geoksyur	3100	3400-2800BCE	Turkmenistan	37.1907	61.0343	218844	PASS(mtcontam=[0.932,0.972])	Turkmenistan_C_Geoksyur		Iran_N_pooled
I8526	M	Turkmenistan_C_Geoksyur	3100	3400-2800BCE	Turkmenistan	37.1907	61.0343	43754	PASS	Turkmenistan_C_Geoksyur		Iran_N_pooled
I8527	M	Turkmenistan_C_Geoksyur	3100	3400-2800BCE	Turkmenistan	37.1907	61.0343	33138	PASS	Turkmenistan_C_Geoksyur		Iran_N_pooled
I8528	F	Turkmenistan_C_Geoksyur	3100	3400-2800BCE	Turkmenistan	37.1907	61.0343	29440	PASS	Turkmenistan_C_Geoksyur		Iran_N_pooled
I8529	M	Turkmenistan_C_Geoksyur	3100	3400-2800BCE	Turkmenistan	37.1907	61.0343	109739	PASS	Turkmenistan_C_Geoksyur		Iran_N_pooled
I8530	F	Turkmenistan_C_Geoksyur	3100	3400-2800BCE	Turkmenistan	37.1907	61.0343	145415	PASS(mtcontam=[0.885,0.975])	Turkmenistan_C_Geoksyur		Iran_N_pooled
I8532	F	Turkmenistan_C_Geoksyur	3100	3400-2800BCE	Turkmenistan	37.1907	61.0343	112575	PASS	Turkmenistan_C_Geoksyur		Iran_N_pooled
I12484_published	F	Turkmenistan_C_Geoksyur_published	3150	3500-2800BCE	Turkmenistan	37.1907	61.0343	124924	PASS	Turkmenistan_C_Geoksyur_published
I4259	F	Turkmenistan_C_Parkhai	3071	3315-2928calBCE(4425±20BP,PSUAMS-2799)	Turkmenistan	38.348	56.2454	677966	PASS	Turkmenistan_C_Parkhai		Iran_N_pooled
I4634	F	Turkmenistan_C_Parkhai	3048	3312-2920calBCE(4415±25BP,PSUAMS-3757)	Turkmenistan	38.348	56.2454	781276	PASS	Turkmenistan_C_Parkhai		Iran_N_pooled
I4635	F	Turkmenistan_C_Parkhai	3500	3700-3300BCE	Turkmenistan	38.348	56.2454	782514	PASS	Turkmenistan_C_Parkhai		Iran_N_pooled
I6669	F	Turkmenistan_C_Parkhai	2974	3081-2907calBCE(4365±25BP,PSUAMS-2950)	Turkmenistan	38.348	56.2454	769168	PASS	Turkmenistan_C_Parkhai		Iran_N_pooled
I10410	F	Turkmenistan_Gonur_BA_1	1800	1900-1700BCE	Turkmenistan	38.2123	62.0344	249248	PASS	Turkmenistan_Gonur_BA_1
I10411	M	Turkmenistan_Gonur_BA_1	2250	2300-2200BCE	Turkmenistan	38.2123	62.0344	233376	PASS	Turkmenistan_Gonur_BA_1
I11042	M	Turkmenistan_Gonur_BA_1	2275	2300-2250BCE	Turkmenistan	38.2123	62.0344	19125	PASS	Turkmenistan_Gonur_BA_1
I1781	M	Turkmenistan_Gonur_BA_1	1882	2014-1771calBCE(3550±30BP,PSUAMS-2065)	Turkmenistan	38.2123	62.0344	312044	PASS	Turkmenistan_Gonur_BA_1
I1782	F	Turkmenistan_Gonur_BA_1	2213	2289-2141calBCE(3785±20BP,PSUAMS-2309)	Turkmenistan	38.2123	62.0344	239217	PASS	Turkmenistan_Gonur_BA_1
I1784	M	Turkmenistan_Gonur_BA_1	2110	2204-2027calBCE(3720±30BP,Poz-83485)	Turkmenistan	38.2123	62.0344	662584	PASS	Turkmenistan_Gonur_BA_1
I1787	F	Turkmenistan_Gonur_BA_1	2073	2140-1977calBCE(3680±20BP,PSUAMS-2310)	Turkmenistan	38.2123	62.0344	29359	PASS	Turkmenistan_Gonur_BA_1
I1788	F	Turkmenistan_Gonur_BA_1	1997	2130-1896calBCE(3630±30BP,PSUAMS-2066)	Turkmenistan	38.2123	62.0344	281189	PASS	Turkmenistan_Gonur_BA_1
I1790	F	Turkmenistan_Gonur_BA_1	2044	2135-1953calBCE(3660±20BP,PSUAMS-2311)	Turkmenistan	38.2123	62.0344	198651	PASS	Turkmenistan_Gonur_BA_1
I1793	F	Turkmenistan_Gonur_BA_1	2088	2195-2027calBCE(3700±20BP,PSUAMS-2312)	Turkmenistan	38.2123	62.0344	113140	PASS	Turkmenistan_Gonur_BA_1
I2085	M	Turkmenistan_Gonur_BA_1	1931	2020-1882calBCE(3580±20BP,PSUAMS-2313)	Turkmenistan	38.2123	62.0344	141334	PASS	Turkmenistan_Gonur_BA_1
I2087	M	Turkmenistan_Gonur_BA_1	2101	2197-2034calBCE(3715±20BP,PSUAMS-2335)	Turkmenistan	38.2123	62.0344	73668	PASS	Turkmenistan_Gonur_BA_1
I2116	F	Turkmenistan_Gonur_BA_1	1966	2123-1830calBCE(3605±35BP,Poz-83490)	Turkmenistan	38.2123	62.0344	317154	PASS	Turkmenistan_Gonur_BA_1
I2121	F	Turkmenistan_Gonur_BA_1	2129	2204-2038calBCE(3735±20BP,PSUAMS-2314)	Turkmenistan	38.2123	62.0344	230253	PASS	Turkmenistan_Gonur_BA_1
I2125	F	Turkmenistan_Gonur_BA_1	2061	2138-1973calBCE(3670±20BP,PSUAMS-2315)	Turkmenistan	38.2123	62.0344	83003	PASS	Turkmenistan_Gonur_BA_1
I2128	M	Turkmenistan_Gonur_BA_1	2106	2199-2035calBCE(3720±20BP,PSUAMS-2316)	Turkmenistan	38.2123	62.0344	35446	PASS(mtmatchmax=0.951-0.98)	Turkmenistan_Gonur_BA_1
I6119	M	Turkmenistan_Gonur_BA_1	2025	2133-1946calBCE(3650±20BP,PSUAMS-2840)	Turkmenistan	38.2123	62.0344	51113	PASS	Turkmenistan_Gonur_BA_1
I6217	F	Turkmenistan_Gonur_BA_1	2189	2286-2064calBCE(3770±20BP,PSUAMS-2806)	Turkmenistan	38.2123	62.0344	15952	PASS	Turkmenistan_Gonur_BA_1
I2123	F	Turkmenistan_Gonur_BA_2	2261	2451-2141calBCE(3815±35BP,Poz-83491)	Turkmenistan	38.2123	62.0344	314905	PASS	Turkmenistan_Gonur_BA_2
ILK002	M	Ukraine_EBA_GlobularAmphora	2784	2889-2675calBCE(4192±22BP,MAMS-30073)	Ukraine	49.5578	27.6886	926361	PASS	Ukraine_EBA_GlobularAmphora
I5884_published	M	Ukraine_EBA_published	2785	2886-2680BCE(4189±17BP)[R_combine:(4195±20BP,PSUAMS-2828);(4175±30BP,PSUAMS-7830)]	Ukraine	48.9142	33.7649	597090	PASS(literature)	Ukraine_EBA_published
I2105	F	Ukraine_EBA_Yamnaya	2900	3300-2500BCE	Ukraine	48.2204	37.1461	802473	PASS	Ukraine_EBA_Yamnaya		Pooled_early_Steppe_pastoralists
I3141_published	F	Ukraine_EBA_Yamnaya_published	2900	3300-2500BCE	Ukraine	48.2204	37.1461	45365	PASS(literature)	Ukraine_EBA_Yamnaya		Pooled_early_Steppe_pastoralists
I4110	F	Ukraine_Eneolithic	3498	3629-3377calBCE(4725±25BP,UCIAMS-186349)	Ukraine	48.9142	33.7649	580868	PASS	Ukraine_Eneolithic
I5882	F	Ukraine_Eneolithic	3055	3308-2925calBCE(4420±20BP,PSUAMS-2826)	Ukraine	48.9142	33.7649	399798	PASS	Ukraine_Eneolithic
I2110	M	Ukraine_Eneolithic_Trypillia	3747	3911-3650calBCE(4976±33BP,OxA-26203)	Ukraine	48.7225	25.8808	164691	PASS	Ukraine_Eneolithic_Trypillia		Neolithic_Europe_pooled
I1926	M	Ukraine_Eneolithic_Trypillia_published	3807	3982-3632calBCE[unionoftwodates:3763-3632calBCE(4890±30BP,Beta-432808);3982-3653calBCE(4985±30BP,OxA-25991)]	Ukraine	48.7225	25.8808	219791	PASS	Ukraine_Eneolithic_Trypillia
I3151_published	M	Ukraine_Eneolithic_Trypillia_published	3800	4000-3600BCE	Ukraine	48.7225	25.8808	34031	PASS(literature,mtcontam=[0.948,0.968])	Ukraine_Eneolithic_Trypillia
I2111_published	M	Ukraine_Eneolithic_Trypillian_published	3672	3765-3543calBCE(4888±32BP,OxA-26204)	Ukraine	48.7225	25.8808	62041	PASS(literature,mtcontam=[0.962,0.978])	Ukraine_Eneolithic_Trypillia
ILK001	M	Ukraine_Globular_Amphora	2823	2900-2701calBCE(4221±22BP,MAMS-30072)	Ukraine	49.5578	27.6886	900165	PASS	Ukraine_Globular_Amphora		Neolithic_Europe_pooled
ILK003	F	Ukraine_Globular_Amphora	2831	2901-2703calBCE(4225±22BP,MAMS-30074)	Ukraine	49.5578	27.6886	869552	PASS	Ukraine_Globular_Amphora		Neolithic_Europe_pooled
I1737_published	F	Ukraine_Mesolithic_published	8408	8543-8299calBCE(9200±35BP,PSUAMS-2394)	Ukraine	47.4342	35.2764	77982	PASS	Ukraine_Mesolithic_published
I5885_published	F	Ukraine_Mesolithic_published	6149	6392-5921calBCE(7270±110BP,OxA-6161)	Ukraine	48.9142	33.7649	163110	PASS	Ukraine_Mesolithic_published
I1732	F	Ukraine_N	5268	5372-5134calBCE(6300±40BP,Poz-81130)	Ukraine	48.1333	35.0833	733086	PASS	Ukraine_N
I1734	M	Ukraine_N	7209	7451-7056calBCE(8190±60BP,Poz-81129)	Ukraine	47.4342	35.2764	764467	PASS	Ukraine_N
I1736	F	Ukraine_N	6160	6242-6072calBCE(7320±40BP,Poz-81154)	Ukraine	47.4342	35.2764	650136	PASS	Ukraine_N
I1738	M	Ukraine_N	5398	5475-5320calBCE(6420±40BP,Poz-81153)	Ukraine	48.1333	35.0833	725220	PASS(Xcontam=[0.005,0.013])	Ukraine_N
I3714	M	Ukraine_N	5150	5500-4800BCE	Ukraine	47.9543	35.3893	118718	PASS	Ukraine_N
I3715	M	Ukraine_N	5576	5636-5483calBCE(6655±35BP,PSUAMS-1907)	Ukraine	47.9543	35.3893	466974	PASS	Ukraine_N
I3717	M	Ukraine_N	5292	5371-5216calBCE(6330±35BP,PSUAMS-1908)	Ukraine	48.9142	33.7649	496612	PASS	Ukraine_N
I3718	M	Ukraine_N	5267	5359-5212calBCE(6300±35BP,PSUAMS-1909)	Ukraine	48.9142	33.7649	496968	PASS	Ukraine_N
I4111	F	Ukraine_N	4643	4725-4542calBCE(5795±35BP,PSUAMS-1910)	Ukraine	48.9142	33.7649	728256	PASS	Ukraine_N
I4114	M	Ukraine_N	5400	5474-5324calBCE(6420±35BP,PSUAMS-1911)	Ukraine	48.9142	33.7649	592049	PASS	Ukraine_N
I5870	M	Ukraine_N	5413	5475-5331calBCE(6430±25BP,PSUAMS-2684)	Ukraine	47.9543	35.3893	214705	PASS	Ukraine_N
I5875	M	Ukraine_N	5145	5295-5053calBCE(6210±25BP,PSUAMS-2810)	Ukraine	48.9142	33.7649	444315	PASS	Ukraine_N
I5883	M	Ukraine_N	5098	5209-4998calBCE(6140±25BP,PSUAMS-2827)	Ukraine	48.9142	33.7649	166148	PASS	Ukraine_N
I5890	M	Ukraine_N	5142	5291-5058calBCE(6210±20BP,PSUAMS-2830)	Ukraine	48.9142	33.7649	294663	PASS	Ukraine_N
I5892	M	Ukraine_N	5119	5301-4952calBCE(6175±60BP,OxA-6162)	Ukraine	48.9142	33.7649	117491	PASS	Ukraine_N
I3712_published	M	Ukraine_N_published	5427	5512-5376calBCE(6490±25BP,PSUAMS-2300)	Ukraine	47.9543	35.3893	56730	PASS(literature)	Ukraine_N_published
I3713_published	M	Ukraine_N_published	4992	5201-4905calBCE(6080±25BP,PSUAMS-2301)	Ukraine	47.9543	35.3893	53024	PASS(literature)	Ukraine_N_published
I3716_published	M	Ukraine_N_published	5397	5473-5320calBCE(6410±25BP,PSUAMS-2302)	Ukraine	47.9543	35.3893	95143	PASS(missingXcontamestimate)	Ukraine_N_published
I4112_published	M	Ukraine_N_published	5150	5500-4500BCE	Ukraine	48.9142	33.7649	54682	PASS(literature)	Ukraine_N_published
I5868_published	M	Ukraine_N_published	5363	5471-5231calBCE(6385±25BP,PSUAMS-2807)	Ukraine	47.9543	35.3893	20747	PASS(literature)	Ukraine_N_published
I5872_published	M	Ukraine_N_published	5424	5481-5374calBCE(6485±25BP,PSUAMS-2808)	Ukraine	47.9543	35.3893	97167	PASS(literature)	Ukraine_N_published
I5873_published	F	Ukraine_N_published	5384	5472-5315calBCE(6400±25BP,PSUAMS-2809)	Ukraine	47.9543	35.3893	21944	PASS(literature)	Ukraine_N_published
I5881_published	M	Ukraine_N_published	5127	5215-5052calBCE(6190±20BP,PSUAMS-2825)	Ukraine	48.9142	33.7649	71101	PASS(literature)	Ukraine_N_published
I5886_published	M	Ukraine_N_published	5262	5313-5214calBCE(6290±25BP,PSUAMS-2829)	Ukraine	48.9142	33.7649	81249	PASS(literature)	Ukraine_N_published
I5889_published	F	Ukraine_N_published	5038	5314-4727calBCE(6110±120BP,OxA-5031)	Ukraine	48.9142	33.7649	50686	PASS(literature)	Ukraine_N_published
I5957_published	M	Ukraine_N_published	5337	5470-5221calBCE(6365±30BP,PSUAMS-3981)	Ukraine	47.9543	35.3893	76993	PASS(literature)	Ukraine_N_published
I6133_published	F	Ukraine_N_published	5250	6500-4000BCE	Ukraine	47.9543	35.3893	40050	PASS(literature)	Ukraine_N_published
I1917	F	Ukraine_Ozera_EBA_Yamnaya	3005	3096-2913calBCE(4390±30BP,Beta-432809)	Ukraine	48.9912	33.9505	602225	PASS(missingscreeningmetrics)	Ukraine_Ozera_EBA_Yamnaya
I2574_published	F	Wales_MBA_published	1327	1417-1226calBCE(3065±36BP,SUERC-62072)	GreatBritain	53.33	-3.78	77807	PASS	Wales_MBA_published
I6754	M	Wales_Mesolithic	7630	7739-7536calBCE(8597±54BP,UBA-32282)	GreatBritain	51.6325	-4.6929	353903	PASS(mtcontam=[0.952,0.97])	Wales_Mesolithic
SB460A3_lib.SG	M	Wales_Mesolithic.SG	7630	7739-7536calBCE(8597±54BP,UBA-32282)	GreatBritain	51.6325	-4.6929	313099	PASS(literature)	Wales_Mesolithic.SG
I3023	M	Wales_N	3350	3750-2950BCE	GreatBritain	52.0349	-3.19357	122277	PASS	Wales_N
I3033	F	Wales_N	3583	3700-3518calBCE(4819±42BP,UBA-32284)	GreatBritain	51.6325	-4.6929	99459	PASS(batch.flag,mtcontam=[0.939,0.958])	Wales_N
I5358	F	Wales_N	2968	3076-2902calBCE(4354±27BP,OxA-17562)	GreatBritain	53.0587	-3.24509	241663	PASS	Wales_N
I5359	M	Wales_N	3650	4000-3300BCE	GreatBritain	51.4514	-3.30787	531741	PASS	Wales_N
I3033_all.SG	F	Wales_N_all.SG	3583	3700-3518calBCE(4819±42BP,UBA-32284)	GreatBritain	51.6325	-4.6929	111477	PASS(literature)	Wales_N_all.SG
SB415A_lib.SG	U	Wales_N.SG	3350	3750-2950BCE	GreatBritain	52.0349	-3.19357	99815	PASS(literature)	Wales_N.SG
SB462A2_lib.SG	F	Wales_N.SG	3583	3700-3518calBCE(4819±42BP,UBA-32284)	GreatBritain	51.6325	-4.6929	79361	PASS(literature)	Wales_N.SG
SB568A_lib.SG	F	Wales_N.SG	2826	2911-2697calBCE(4233±32BP,OxA-12741)	GreatBritain	53.1146	-4.13021	86067	PASS(literature)	Wales_N.SG
SB570A_lib.SG	F	Wales_N.SG	2968	3076-2902calBCE(4354±27BP,OxA-17562)	GreatBritain	53.0587	-3.24509	211584	PASS(literature)	Wales_N.SG
SB573A_lib.SG	M	Wales_N.SG	3650	4000-3300BCE	GreatBritain	51.4514	-3.30819	472225	PASS(literature)	Wales_N.SG
SB577A_lib.SG	F	Wales_N.SG	3250	4000-2500BCE	GreatBritain	53.3098	-3.37263	119193	PASS(literature)	Wales_N.SG
I3025	F	England_Mesolithic	7307	7476-7085calBCE(8270±45BP,OxA-23812)	GreatBritain	50.4682	-3.50307	85566	PASS	WHG		WHG_pooled
I6745	F	England_Mesolithic	8596	8751-8433calBCE(9340±50BP,OxA-34338)	GreatBritain	51.3247	-2.75325	89618	PASS	WHG		WHG_pooled
I6767	M	England_Mesolithic	8330	8615-7966calBCE(9100±100BP,OxA-814)	GreatBritain	51.2817	-2.76575	777238	PASS(mtmatchmax=0.95-0.985)	WHG		WHG_pooled
I3025.SG	F	England_Mesolithic.SG	7307	7476-7085calBCE(8270±45BP,OxA-23812)	GreatBritain	50.4682	-3.50307	84473	PASS(literature)	WHG		WHG_pooled
SB343C3_lib.SG	F	England_Mesolithic.SG	8596	8751-8433calBCE(9340±50BP,OxA-34338)	GreatBritain	51.3247	-2.75325	74513	PASS(literature)	WHG		WHG_pooled
BerryAuBac	M	France_BerryAuBac	5287	5368-5216calBCE(6325±35BP,SacA-5455)	France	49.24	3.54	56613	PASS(manual.QC)	WHG		WHG_pooled
BerryAuBac_published	M	France_BerryAuBac_published	5287	5368-5216calBCE(6325±35BP,SacA-5455)	France	49.24	3.54	51841	PASS(manual.QC)	WHG		WHG_pooled
Chaudardes1_published_d	M	France_Chaudardes_published	6268	6400-6086calBCE(7400±60BP,GrA-28268)	France	49.24	3.46	87199	PASS(manual.QC)	WHG		WHG_pooled
Iboussieres25-1	M	France_Iboussieres25_1	9725	10050-9400BCE	France	44.29	4.46	77062	PASS(manual.QC)	WHG		WHG_pooled
Iboussieres31-2	M	France_Iboussieres31_2	9725	10050-9400BCE	France	44.29	4.46	80100	PASS(manual.QC)	WHG		WHG_pooled
Ranchot88_published_d	F	France_Ranchot88_published	8184	8290-7968calBCE(8985±40BP,GrA-38019)	France	47.91	5.43	385069	PASS(manual.QC)	WHG		WHG_pooled
Rochedane_published	M	France_Rochedane_published	11077	11207-10955calBCE(11120±50BP,GrA-41739)	France	47.21	6.45	222935	PASS(manual.QC)	WHG		WHG_pooled
Falkenstein	M	Germany_Falkenstein	7211	7472-7042calBCE(8185±80BP,ETH-7615)	Germany	48.06	9.04	181262	PASS(manual.QC)	WHG		WHG_pooled
Falkenstein_published_d	M	Germany_Falkenstein_published	7211	7472-7042calBCE(8185±80BP,ETH-7615)	Germany	48.06	9.04	60409	PASS(manual.QC)	WHG		WHG_pooled
BDB001	F	Germany_Mesolithic	6650	7100-6200BCE	Germany	51.3	12.07	803839	PASS(literature)	WHG		WHG_pooled
BOT004	M	Germany_Mesolithic	5600	5750-5450BCE	Germany	51.31	11.4	33519	PASS(literature)	WHG		WHG_pooled
BOT005	F	Germany_Mesolithic	5598	5701-5486calBCE(6685±38BP,OxA-27248)	Germany	51.31	11.4	83640	PASS(literature)	WHG		WHG_pooled
I2158_published	F	Italy_Sicily_HG_OrienteC_published	10050	12350-7750BCE	Italy	37.9333	12.3333	61547	PASS(literaturemtcontam=[0.951,0.972])	WHG		WHG_pooled
I0001	M	Luxembourg_Loschbour	6075	6221-5986calBCE(7205±50BP,OxA-7738)	Luxembourg	49.81	6.4	464995	PASS	WHG		WHG_pooled
Loschbour_published.DG	M	Luxembourg_Loschbour_published.DG	6075	6221-5986calBCE(7205±50BP,OxA-7738)	Luxembourg	49.81	6.4	1139327	PASS(literature)	WHG		WHG_pooled
I3065.SG	F	Scotland_Mesolithic_all.SG	4340	4444-4255calBCE(5492±36BP,SUERC-69249)	GreatBritain	56.0116	-6.24002	26094	PASS(literature)	WHG		WHG_pooled
Canes.SG	F	Spain_HG.SG	5139	5299-5011calBCE(6197±45BP,OxA-7148/AA-5294)	Spain	43.355	-4.71668	804993	PASS(literature)	WHG		WHG_pooled
Bichon.SG	M	Switzerland_Bichon.SG	11748	11850-11579calBCE(11855±50BP,OxA-27763)	Switzerland	47.1	6.87	1176132	PASS(literature)	WHG		WHG_pooled
Villabruna	M	Italy_North_Villabruna_HG	12071	12268-11851calBCE(12140±70BP,KIA-27004)	Italy	46.15	12.21	902419	PASS	WHG
I4436	M	Latvia_MN_o2	4159	4318-4051calBCE(5335±30BP,PSUAMS-2233)	Latvia	56.2833	25.1333	751632	PASS(Xcontam=[0.005,0.012])			EHG_pooled
I4435	F	Latvia_MN_o3	4022	4214-3958calBCE(5210±30BP,PSUAMS-2232)	Latvia	56.2833	25.1333	729122	PASS			EHG_pooled
I4554	F	Latvia_MN_o3	3996	4048-3951calBCE(5180±30BP,PSUAMS-2237)	Latvia	56.2833	25.1333	722665	PASS			EHG_pooled
AY2001	F	Russia_Steppe_Maikop_o2	3447	3514-3360BCE(4636±27BP)[R_combine:(4480±50BP,GIN-11811);(4698±32BP,OxA-16182)]	Russia	45.6883	43.2646	815593	PASS(literature)			EHG_pooled

## Sheet: Supplementary File 1B
Supplementary File 1B: Estimated dates of admixture for population mixture events during the European Holocene
Population	n	Analysis group	Average age of samples (BCE)	Reference populations used in DATES	DATES_mean (generations)	DATES_SE (generations)	Zscore	DATES_mean (BCE)	DATES_SE (BCE)
Norway_Mesolithic.SG	2	European Mesolithic HG	7414	WHG / EHG	101	47	2	10242	1316
Sweden_Mesolithic.SG	3	European Mesolithic HG	6987	WHG / EHG	113	28	4	10151	784
Sweden_Motala_HG	6	European Mesolithic HG	5680	WHG / EHG	80	16	5	7920	448
Latvia_MN_Comb_Ware.SG	1 ^	European Mesolithic HG	4093	WHG / EHG	188	94	2	9357	2632
Latvia_HG	16	European Mesolithic HG	5727	WHG / EHG	68	8	9	7631	224
Lithuania_EMN_Narva	6	European Mesolithic HG	4444	WHG / EHG	110	19	6	7524	532
Latvia_MN	2	European Mesolithic HG	4168	WHG / EHG	115	24	5	7388	672
Iron_Gates	33	European Mesolithic HG	6728	WHG / EHG	89	15	6	9220	420
Hungary_Koros	2 ^	European Mesolithic HG	5680	WHG / EHG	103	30	3	8564	840
Ukraine_N	15	European Mesolithic HG	5419	WHG / EHG	81	22	4	7687	616
Early_Anatolian_farmers	9	Early Anatolian Neolithic farmers	8071	(WHG_pooled+Levant_N) / Iran_N_pooled	101	23	4	10899	644
Iran_HajjiFiruz_C	3	Iran Chalcolithic farmers	5906	Iran_N / Anatolian_farmers	62	25	2	7642	700
Iran_C_SehGabi	4	Iran Chalcolithic farmers	4267	Iran_N / Anatolian_farmers	50	14	4	5667	392
Balkans_N	12	Neolithic Europe	5541	WHG_pooled /Anatolian_farmers	18	6	3	6045	168
Balkans_C	11*	Neolithic Europe	4302	WHG_pooled /Anatolian_farmers	29	9	3	5114	252
Hungary_MN_ALPc_Esztar	2	Neolithic Europe	5100	WHG_pooled /Anatolian_farmers	34	7	5	6052	196
Hungary_MN_ALPc	6	Neolithic Europe	5129	WHG_pooled /Anatolian_farmers	26	4	7	5857	112
Hungary_MN_ALPc_Szakalhat	3	Neolithic Europe	5100	WHG_pooled /Anatolian_farmers	25	8	3	5800	224
Hungary_MN_ALPc.SG	2^	Neolithic Europe	5108	WHG_pooled /Anatolian_farmers	21	9	2	5696	252
Hungary_MN_ALPc_Bukk	1	Neolithic Europe	5127	WHG_pooled /Anatolian_farmers	19	3	6	5659	84
Hungary_MN_ALBK_Szakalhat	2	Neolithic Europe	5100	WHG_pooled /Anatolian_farmers	20	3	6	5660	84
Hungary_MN_LBK	6	Neolithic Europe	5084	WHG_pooled /Anatolian_farmers	19	7	2	5616	196
Hungary_MN_ALPc_Tiszadob	6	Neolithic Europe	5081	WHG_pooled /Anatolian_farmers	17	2	7	5557	56
Hungary_MN_ALPc_Bukk.SG	1	Neolithic Europe	5127	WHG_pooled /Anatolian_farmers	15	3	5	5547	84
Hungary_EarlyC_Tiszapolgar_Bodrogkeresztur_published	1	Neolithic Europe	4323	WHG_pooled /Anatolian_farmers	42	14	3	5499	392
Hungary_LN_Tisza	4	Neolithic Europe	4750	WHG_pooled /Anatolian_farmers	25	7	4	5450	196
Hungary_LN_Sopot	5	Neolithic Europe	4912	WHG_pooled /Anatolian_farmers	18	7	2	5416	196
Hungary_LN_Lengyel	6	Neolithic Europe	4592	WHG_pooled /Anatolian_farmers	29	6	5	5404	168
Hungary_EarlyC_Tiszapolgar	3	Neolithic Europe	4250	WHG_pooled /Anatolian_farmers	38	17	2	5314	476
Hungary_MN	1	Neolithic Europe	4136	WHG_pooled /Anatolian_farmers	32	5	7	5032	140
Hungary_LateC_Protoboleraz	2	Neolithic Europe	3718	WHG_pooled /Anatolian_farmers	45	9	5	4978	252
Hungary_Hunyadihalom_MCHA	1	Neolithic Europe	4060	WHG_pooled /Anatolian_farmers	31	6	5	4928	168
Hungary_Baden_LateCA.SG	1	Neolithic Europe	3069	WHG_pooled /Anatolian_farmers	57	22	3	4665	616
Hungary_LateC_Baden	10	Neolithic Europe	3192	WHG_pooled /Anatolian_farmers	49	9	5	4564	252
Czech_N	2	Neolithic Europe	4408	WHG_pooled /Anatolian_farmers	43	6	7	5612	168
Czech_Baalberge	1	Neolithic Europe	3600	WHG_pooled /Anatolian_farmers	57	21	3	5196	588
Czech_Megalithic.SG	1	Neolithic Europe	4825	WHG_pooled /Anatolian_farmers	10	4	3	5105	112
Austria_EN_LBK	8	Neolithic Europe	5031	WHG_pooled /Anatolian_farmers	18	2	8	5535	56
Germany_EN_LBK_Stuttgart_published.DG	1^	Neolithic Europe	5218	WHG_pooled /Anatolian_farmers	24	5	4	5890	140
Germany_EN_LBK	53	Neolithic Europe	5117	WHG_pooled /Anatolian_farmers	17	3	6	5593	84
Germany_N_published	1	Neolithic Europe	4450	WHG_pooled /Anatolian_farmers	19	4	5	4982	112
Germany_MN_Baalberge	3	Neolithic Europe	3650	WHG_pooled /Anatolian_farmers	47	8	6	4966	224
Germany_Blatterhohle_MN	1*	Neolithic Europe	3384	WHG_pooled /Anatolian_farmers	16	4	4	3832	112
Poland_TRB.SG	2	Neolithic Europe	3513	WHG_pooled /Anatolian_farmers	43	10	4	4717	280
Poland_Ksiaznice_GAC.SG	3	Neolithic Europe	2944	WHG_pooled /Anatolian_farmers	62	10	6	4680	280
Poland_Globular_Amphora	5	Neolithic Europe	2983	WHG_pooled /Anatolian_farmers	49	8	6	4355	224
Poland_Sandomierz_GAC.SG	2	Neolithic Europe	2812	WHG_pooled /Anatolian_farmers	42	16	3	3988	448
Poland_Koszyce_GAC.SG	6	Neolithic Europe	2826	WHG_pooled /Anatolian_farmers	41	6	6	3974	168
Poland_Mierzanowice_GAC.SG	1	Neolithic Europe	2775	WHG_pooled /Anatolian_farmers	39	16	2	3867	448
Ukraine_Eneolithic_Trypillia	4	Neolithic Europe	3747	WHG_pooled /Anatolian_farmers	61	13	5	5455	364
Ukraine_Globular_Amphora	2	Neolithic Europe	2827	WHG_pooled /Anatolian_farmers	38	7	5	3891	196
France_GrandEst_EN.SG	2 ^	Neolithic Europe	5078	WHG_pooled /Anatolian_farmers	48	9	5	6422	252
France_EN	2 ⊢	Neolithic Europe	5411	WHG_pooled /Anatolian_farmers	6	1	6	5579	28
France_HautsDeFrance_MN.SG	2	Neolithic Europe	4333	WHG_pooled /Anatolian_farmers	44	12	4	5565	336
France_EN_MN	4 ⊳	Neolithic Europe	4852	WHG_pooled /Anatolian_farmers	23	2	12	5496	56
France_MN	40* °	Neolithic Europe	4507	WHG_pooled /Anatolian_farmers	30	1	25	5347	28
France_Alsace_Lingolsheim_MN	2	Neolithic Europe	4681	WHG_pooled /Anatolian_farmers	15	6	3	5101	168
France_GrandEst_MN.SG	10	Neolithic Europe	4213	WHG_pooled /Anatolian_farmers	29	2	14	5025	56
France_EN_PEN_B	1	Neolithic Europe	5409	WHG_pooled /Anatolian_farmers	6	1	5	5577	28
France_EN_PEN_A	2	Neolithic Europe	5412	WHG_pooled /Anatolian_farmers	6	1	5	5580	28
France_MN_GRG	22 ^	Neolithic Europe	4522	WHG_pooled /Anatolian_farmers	35	2	19	5502	56
France_ENMN_LBR_A	4	Neolithic Europe	4852	WHG_pooled /Anatolian_farmers	23	2	12	5496	56
France_MN_FLR	9	Neolithic Europe	4386	WHG_pooled /Anatolian_farmers	34	3	12	5338	84
France_MN_OBN_A	4	Neolithic Europe	4758	WHG_pooled /Anatolian_farmers	15	3	5	5178	84
France_MN_OBN_C	5	Neolithic Europe	4626	WHG_pooled /Anatolian_farmers	19	5	4	5158	140
France_MN_PRI	3^	Neolithic Europe	4223	WHG_pooled /Anatolian_farmers	32	7	4	5119	196
France_MN_OBN_B	2	Neolithic Europe	4627	WHG_pooled /Anatolian_farmers	14	3	5	5019	84
Italy_N.SG	8 ^	Neolithic Europe	5575	WHG_pooled /Anatolian_farmers	20	7	3	6135	196
Italy_Sardinia_N	12	Neolithic Europe	3909	WHG_pooled /Anatolian_farmers	72	18	4	5925	504
Italy_C.SG	3	Neolithic Europe	3632	WHG_pooled /Anatolian_farmers	63	11	6	5396	308
Italy_Sicily_MN	2*	Neolithic Europe	4845	WHG_pooled /Anatolian_farmers	19	4	5	5377	112
Italy_C_BA.SG	3	Neolithic Europe	2106	WHG_pooled /Anatolian_farmers	60	10	6	3786	280
Spain_EN	11	Neolithic Europe	5066	WHG_pooled /Anatolian_farmers	21	4	6	5654	112
Spain_EN.SG	5	Neolithic Europe	5118	WHG_pooled /Anatolian_farmers	16	4	4	5566	112
Gibraltar_EN	1	Neolithic Europe	5000	WHG_pooled /Anatolian_farmers	15	7	2	5420	196
Spain_LN.SG	2	Neolithic Europe	3694	WHG_pooled /Anatolian_farmers	47	10	5	5010	280
Spain_MLN	37*	Neolithic Europe	3371	WHG_pooled /Anatolian_farmers	55	4	12	4911	112
Spain_C	71	Neolithic Europe	2605	WHG_pooled /Anatolian_farmers	69	5	14	4537	140
Spain_C.SG	6	Neolithic Europe	2865	WHG_pooled /Anatolian_farmers	64	6	11	4657	168
Spain_MN.SG	1	Neolithic Europe	2516	WHG_pooled /Anatolian_farmers	74	20	4	4588	560
Portugal_MN.SG	4*	Neolithic Europe	3555	WHG_pooled /Anatolian_farmers	77	8	10	5711	224
Portugal_C	14	Neolithic Europe	2821	WHG_pooled /Anatolian_farmers	84	9	9	5173	252
Portugal_LN_C.SG	3	Neolithic Europe	2667	WHG_pooled /Anatolian_farmers	59	16	4	4319	448
Ireland_EN.SG	4	Neolithic Europe	3781	WHG_pooled /Anatolian_farmers	50	6	8	5181	168
Ireland_EN_MN.SG	5	Neolithic Europe	3616	WHG_pooled /Anatolian_farmers	54	5	11	5128	140
Ireland_N.SG	2	Neolithic Europe	3016	WHG_pooled /Anatolian_farmers	72	24	3	5032	672
Ireland_LN.SG	5	Neolithic Europe	2797	WHG_pooled /Anatolian_farmers	65	9	8	4617	252
Scotland_Megalithic.SG	4	Neolithic Europe	3287	WHG_pooled /Anatolian_farmers	62	14	4	5023	392
Scotland_N	28*	Neolithic Europe	3289	WHG_pooled /Anatolian_farmers	59	4	16	4941	112
England_N.SG	15*	Neolithic Europe	3507	WHG_pooled /Anatolian_farmers	54	4	14	5019	112
England_N	15*	Neolithic Europe	3431	WHG_pooled /Anatolian_farmers	61	5	11	5139	140
Sweden_TRB_MN	1	Neolithic Europe	3796	WHG_pooled /Anatolian_farmers	54	25	2	5308	700
Sweden_TRB_MN.SG	3	Neolithic Europe	3029	WHG_pooled /Anatolian_farmers	46	11	4	4317	308
Sweden_Ansarve_Megalithic.SG	5*	Neolithic Europe	3162	WHG_pooled /Anatolian_farmers	40	7	6	4282	196
Russia_Samara_EBA_Yamnaya	10	Early Steppe pastoralists	2934	EHG_pooled / Iran_N_pooled	41	8	5	4082	224
Russia_Afanasievo	19	Early Steppe pastoralists	2847	EHG_pooled / Iran_N_pooled	46	4	12	4135	112
Kazakhstan_EBA_Yamnaya.SG	1	Early Steppe pastoralists	2940	EHG_pooled / Iran_N_pooled	52	13	4	4396	364
Russia_Caucasus_EBA_Yamnaya	3	Early Steppe pastoralists	2941	EHG_pooled / Iran_N_pooled	38	14	3	4005	392
Ukraine_EBA_Yamnaya	2	Early Steppe pastoralists	2900	EHG_pooled / Iran_N_pooled	61	12	5	4608	336
Pooled_early_Steppe_Pastoralists	35	Early Steppe pastoralists	2881	EHG_pooled / Iran_N_pooled	46	3	15	4169	84
Russia_MLBA_Sintashta	34	MLBA Steppe pastoralists	1873	Steppe/ Neolithic_Europe_pooled	47	3	14	3189	84
Russia_Potapovka	1 ^	MLBA Steppe pastoralists	2061	Steppe/ Neolithic_Europe_pooled	39	12	3	3153	336
Russia_Srubnaya	11	MLBA Steppe pastoralists	1638	Steppe/ Neolithic_Europe_pooled	45	4	11	2898	112
Russia_Srubnaya_Alakul.SG	12	MLBA Steppe pastoralists	1710	Steppe/ Neolithic_Europe_pooled	35	5	7	2690	140
Russia_Andronovo.SG	3	MLBA Steppe pastoralists	1625	Steppe/ Neolithic_Europe_pooled	46	4	12	2913	112
Kazakhstan_Maitan_MLBA_Alakul	7	MLBA Steppe pastoralists	1750	Steppe/ Neolithic_Europe_pooled	52	4	14	3206	112
Kazakhstan_MLBA_Aktogai	5	MLBA Steppe pastoralists	1517	Steppe/ Neolithic_Europe_pooled	47	4	11	2833	112
Kazakhstan_MLBA_Kairan	5	MLBA Steppe pastoralists	1724	Steppe/ Neolithic_Europe_pooled	38	9	4	2788	252
Sweden_BattleAxe.SG	0.01	Bronze age Europe	2537	(WHG + Anatolian_farmers)/ (Yamnaya + Afanaseivo)	24	8	3	3209	224
Denmark_MN_B.SG	1	Bronze age Europe	2619	(WHG + Anatolian_farmers)/ (Yamnaya + Afanaseivo)	19	3	6	3151	84
Estonia_CordedWare.SG	3	Bronze age Europe	2539	(WHG + Anatolian_farmers)/ (Yamnaya + Afanaseivo)	14	6	2	2931	168
Czech_CordedWare	7	Bronze age Europe	2409	(WHG + Anatolian_farmers)/ (Yamnaya + Afanaseivo)	17	2	7	2885	56
Germany_CordedWare	11	Bronze age Europe	2340	(WHG + Anatolian_farmers)/ (Yamnaya + Afanaseivo)	26	13	2	3068	364
Poland_CWC.SG	5*	Bronze age Europe	2733	(WHG + Anatolian_farmers)/ (Yamnaya + Afanaseivo)	10	4	2	3013	112
Poland_Southeast_CordedWare.SG	13	Bronze age Europe	2373	(WHG + Anatolian_farmers)/ (Yamnaya + Afanaseivo)	21	6	3	2961	168
Poland_Southeast_CordedWare_MC.SG	1 ^	Bronze age Europe	2287	(WHG + Anatolian_farmers)/ (Yamnaya + Afanaseivo)	8	3	3	2511	84
Lithuania_LN	3 ^	Bronze age Europe	2672	(WHG + Anatolian_farmers)/ (Yamnaya + Afanaseivo)	30	8	4	3512	224
Spain_EBA_Mallorca	1	Bronze age Europe	2383	(WHG + Anatolian_farmers)/ (Yamnaya + Afanaseivo)	29	7	4	3195	196
France_BellBeaker	7	Bronze age Europe	2215	(WHG + Anatolian_farmers)/ (Yamnaya + Afanaseivo)	18	4	4	2719	112
Italy_North_BellBeaker	3	Bronze age Europe	2062	(WHG + Anatolian_farmers)/ (Yamnaya + Afanaseivo)	16	7	2	2510	196
Switzerland_BellBeaker	3	Bronze age Europe	2225	(WHG + Anatolian_farmers)/ (Yamnaya + Afanaseivo)	17	8	2	2701	224
Germany_SouthernGermany_Anselfingen_EBA	1	Bronze age Europe	2296	(WHG + Anatolian_farmers)/ (Yamnaya + Afanaseivo)	21	9	2	2884	252
Germany_BellBeaker	44	Bronze age Europe	2282	(WHG + Anatolian_farmers)/ (Yamnaya + Afanaseivo)	20	2	9	2842	56
Germany_Lech_BellBeaker	8	Bronze age Europe	2305	(WHG + Anatolian_farmers)/ (Yamnaya + Afanaseivo)	15	5	3	2725	140
Germany_BenzigerodeHeimburg_LN	2	Bronze age Europe	2199	(WHG + Anatolian_farmers)/ (Yamnaya + Afanaseivo)	16	7	2	2647	196
Netherlands_BellBeaker	9	Bronze age Europe	2065	(WHG + Anatolian_farmers)/ (Yamnaya + Afanaseivo)	34	5	7	3017	140
Netherlands_BA	2	Bronze age Europe	1760	(WHG + Anatolian_farmers)/ (Yamnaya + Afanaseivo)	25	5	5	2460	140
Czech_EBA	7	Bronze age Europe	2127	(WHG + Anatolian_farmers)/ (Yamnaya + Afanaseivo)	30	5	6	2967	140
Czech_BellBeaker	35	Bronze age Europe	2227	(WHG + Anatolian_farmers)/ (Yamnaya + Afanaseivo)	16	2	10	2675	56
Hungary_EBA_BellBeaker	11	Bronze age Europe	2331	(WHG + Anatolian_farmers)/ (Yamnaya + Afanaseivo)	22	4	6	2947	112
Hungary_EBA_Protonagyrev	2	Bronze age Europe	2206	(WHG + Anatolian_farmers)/ (Yamnaya + Afanaseivo)	16	7	2	2654	196
Poland_BellBeaker	7	Bronze age Europe	2177	(WHG + Anatolian_farmers)/ (Yamnaya + Afanaseivo)	13	4	3	2541	112
Poland_ChopiceVeseleCulture	2	Bronze age Europe	2172	(WHG + Anatolian_farmers)/ (Yamnaya + Afanaseivo)	25	8	3	2872	224
England_C_EBA	25	Bronze age Europe	1904	(WHG + Anatolian_farmers)/ (Yamnaya + Afanaseivo)	29	5	5	2716	140
England_BellBeaker	19	Bronze age Europe	2155	(WHG + Anatolian_farmers)/ (Yamnaya + Afanaseivo)	18	2	10	2659	56
Scotland_C_EBA	6	Bronze age Europe	1883	(WHG + Anatolian_farmers)/ (Yamnaya + Afanaseivo)	31	5	7	2751	140
Germany_EBA_Unetice	5*	Bronze age Europe	2013	(WHG + Anatolian_farmers)/ (Yamnaya + Afanaseivo)	42	19	2	3189	532
Germany_SouthernGermany_Singen_EBA	9*	Bronze age Europe	1926	(WHG + Anatolian_farmers)/ (Yamnaya + Afanaseivo)	34	4	9	2878	112
Balkans_MBA	2	Bronze age Europe	1564	(WHG + Anatolian_farmers)/ (Yamnaya + Afanaseivo)	49	11	4	2936	308
Balkans_LBA	1 ^	Bronze age Europe	1689	(WHG + Anatolian_farmers)/ (Yamnaya + Afanaseivo)	42	11	4	2865	308
France_GrandEst_EBA.SG	7	Bronze age Europe	1838	(WHG + Anatolian_farmers)/ (Yamnaya + Afanaseivo)	37	11	3	2874	308
Czech_BA_Veterov_1	1	Bronze age Europe	1072	(WHG + Anatolian_farmers)/ (Yamnaya + Afanaseivo)	72	17	4	3088	476
Hungary_LBA_Kyjatice	1	Bronze age Europe	908	(WHG + Anatolian_farmers)/ (Yamnaya + Afanaseivo)	110	33	3	3988	924
Hungary_EBA_Mako	1	Bronze age Europe	2076	(WHG + Anatolian_farmers)/ (Yamnaya + Afanaseivo)	18	9	2	2580	252
Switzerland_EBA_2	12	Bronze age Europe	2092	(WHG + Anatolian_farmers)/ (Yamnaya + Afanaseivo)	19	4	4	2624	112
Italy_Sicily_EBA	9	Bronze age Europe	2004	(WHG + Anatolian_farmers)/ (Yamnaya + Afanaseivo)	30	11	3	2844	308
Italy_Sardinia_IA_2	1	Bronze age Europe	626	(WHG + Anatolian_farmers)/ (Yamnaya + Afanaseivo)	71	20	4	2614	560
Spain_BA_merged	10	Bronze age Europe	1388	(WHG + Anatolian_farmers)/ (Yamnaya + Afanaseivo)	40	16	3	2508	448
Portugal_MBA.SG	4	Bronze age Europe	1599	(WHG + Anatolian_farmers)/ (Yamnaya + Afanaseivo)	94	22	4	4231	616
Latvia_BA	10	Bronze age Europe	586	(WHG + Anatolian_farmers)/ (Yamnaya + Afanaseivo)	69	8	8	2518	224
Estonia_BA.SG	14	Bronze age Europe	923	(WHG + Anatolian_farmers)/ (Yamnaya + Afanaseivo)	78	12	7	3107	336
Sweden_LN.SG	2*	Bronze age Europe	1990	(WHG + Anatolian_farmers)/ (Yamnaya + Afanaseivo)	47	15	3	3306	420
Sweden_Late_N.SG	2	Bronze age Europe	1796	(WHG + Anatolian_farmers)/ (Yamnaya + Afanaseivo)	27	5	5	2552	140
Denmark_LN_BA.SG	1	Bronze age Europe	1888	(WHG + Anatolian_farmers)/ (Yamnaya + Afanaseivo)	78	15	5	4072	420
Denmark_LBA.SG	1	Bronze age Europe	662	(WHG + Anatolian_farmers)/ (Yamnaya + Afanaseivo)	103	31	3	3546	868
Scotland_MBA	4	Bronze age Europe	1346	(WHG + Anatolian_farmers)/ (Yamnaya + Afanaseivo)	56	9	6	2914	252
Scotland_LBA	5	Bronze age Europe	880	(WHG + Anatolian_farmers)/ (Yamnaya + Afanaseivo)	56	12	5	2448	336
England_MBA	8	Bronze age Europe	1361	(WHG + Anatolian_farmers)/ (Yamnaya + Afanaseivo)	56	6	10	2929	168
England_LBA	2	Bronze age Europe	1107	(WHG + Anatolian_farmers)/ (Yamnaya + Afanaseivo)	53	15	3	2591	420
