# Supplementary material for: The spatiotemporal patterns of major human admixture events during the European Holocene
Source: eLife. 2022 May 30;11:e77625. doi: 10.7554/eLife.77625 (PMC9293011; doi:10.7554/eLife.77625)
Supplement: Supplementary file 2. — (A) Modeling population admixture of hunter-gatherer (HG) groups using qpAdm in ADMIXTOOLS. (B) D-statistics to assess the affinity of Mesolithic HG groups to western hunter-gatherers (WHGs) or Anatolian farmers. (C) Modeling population admixture of Near Eastern farmers using qpAdm in ADMIXTOOLS. (D) Modeling population admixture of Neolithic European groups using qpAdm in ADMIXTOOLS. (E) Modeling population admixture of Neolithic European groups per individual using qpAdm in ADMIXTOOLS. (F) D-statistics to explore the affinity of the target groups to Steppe pastoralists or Anatolian farmers. (G) Modeling population admixture of Early Steppe pastoralists groups using qpAdm in ADMIXTOOLS. (H) Genetic distance (FST) in early Steppe pastoralists groups. (I) Modeling population admixture of Bronze Age groups using qpAdm in ADMIXTOOLS. (J) Modeling population admixture of Bronze Age groups per individual using qpAdm in ADMIXTOOLS. (K) Modeling population admixture of middle to late Bronze Age (MLBA) Steppe pastoralists groups. Age groups using qpAdm in ADMIXTOOLS. [file elife-77625-supp2.xlsx]

## Sheet: Table A qpAdm Mesolithic HG
Table A: qpAdm analysis of Mesolithic hunter-gatherers.
Sources: WHG and EHG
Outgroups: Model-A with seven outgroups (O7: Mbuti Pygmies, Ethiopian Mota, Russian Ust’ Ishim HG, Russian Mal’ta HG, Papuan, Onge, and Han)
Target	Region	WHG	EHG	SE_WHG	SE_EHG	p-value	Alternate models
Norway_Mesolithic.SG	Scandinavia	0.25	0.75	0.059	0.059	0.433
Norway_N_HG.SG	Scandinavia	0.267	0.733	0.07	0.07	0.113
Sweden_HG.SG	Scandinavia	0.875	0.125	0.132	0.132	0.215
Sweden_Motala_HG	Scandinavia	0.438	0.562	0.041	0.041	0.325
Sweden_Mesolithic.SG	Scandinavia	0.48	0.52	0.05	0.05	0.372
Estonia_EMN_Narva	Baltic sea region	0.476	0.524	0.068	0.068	0.649
Estonia_MN_CCC	Baltic sea region	0.24	0.76	0.083	0.083	0.004
Estonia_N_CombCeramic.SG	Baltic sea region	0.172	0.828	0.09	0.09	0.846
Latvia_HG	Baltic sea region	0.604	0.396	0.031	0.031	0.622
Latvia_MN	Baltic sea region	0.606	0.394	0.053	0.053	0.71
Latvia_MN_Comb_Ware.SG	Baltic sea region	0.054	0.946	0.071	0.071	0.721
Lithuania_EMN_Narva	Baltic sea region	0.797	0.203	0.038	0.038	0.411
Lithuania_Mesolithic	Baltic sea region	0.903	0.097	0.068	0.068	0.722
Ukraine_N	Central Europe	0.428	0.572	0.031	0.031	0.533
Hungary_Koros	Central Europe	0.936	0.064	0.061	0.061	0.077
Iron Gates	Central Europe	0.85	0.15	0.029	0.029	0.272	0.638 ± 0.109 WHG; 0.224 ± 0.043 EHG ; 0.138 ± 0.072 Anatolian HG (p-value: 0.926236)
Note: p-values < 0.05 shown in red highlight models that were a poor fit.

## Sheet: Table B  D-statistics to assess
Table B: D-statistics to assess the affinity of Mesolithic HG groups to WHG or Anatolian farmers
Statistic: D(Mbuti, target, WHG, Anatolian farmers) where target = Mesolithic hunter-gatherers.
Target	D-score (Z-score)	Target closer to WHG or Anatolian farmer
Norway_Mesolithic.SG	-0.1028 (-32.043)	WHG
Norway_N_HG.SG	-0.1023 (-27.869)	WHG
Sweden_HG.SG	-0.0805 (-17.809)	WHG
Sweden_Motala_HG	-0.1253 (-42.481)	WHG
Sweden_Mesolithic.SG	-0.1243 (-43.667)	WHG
Estonia_EMN_Narva	-0.1265 (-38.037)	WHG
Estonia_MN_CCC	-0.0895 (-26.438)	WHG
Estonia_N_CombCeramic.SG	-0.0922 (-21.145)	WHG
Latvia_HG	-0.1515 (-60.979)	WHG
Latvia_MN	-0.1367 (-44.476)	WHG
Latvia_MN_Comb_Ware.SG	-0.0857 (-24.305)	WHG
Lithuania_EMN_Narva	-0.1564 (-56.820)	WHG
Lithuania_Mesolithic	-0.1738 (-46.433)	WHG
Ukraine_N	-0.0989 (-40.671)	WHG
Hungary_Koros	-0.1593 (-46.340)	WHG
IronGates	-0.1526 (-60.960)	WHG

## Sheet: Table C qpAdm Near East farmers
Table C: qpAdm analysis of Near Eastern farmers
Outgroups: O7: Mbuti Pygmies, Ethiopian Mota, Russian Ust’ Ishim HG, Russian Mal’ta HG, Papuan, Onge, and Han
A. Early Anatolian farmers
Target	Outgroups	AHG	Iran_N	SE AHG	SE_Iran_N	p-value
Early Anatolian farmers	O7, WHG and EHG	0.891	0.109	0.044	0.044	0.964802
B. Hajji_Firuz_C
Target	Outgroups	Iran_C_Seh Gabi	Anatolian farmers	SE Iran_Seh_Gabi	SE Anatolian farmers	p-value
Hajji_Firuz_C	O7 and EHG	0.705	0.295	0.055	0.105	0.105
C. Iran_C_SehGabi
Target	Outgroups	Iran_N	Anatolian farmers	SE Iran_N	SE Anatolian farmers	p-value
Iran_C_SehGabi	O7, EHG and Levant HG	0.653	0.347	0.069	0.069	0.595

## Sheet: Table D qpadm_Neolithic_Europe
Table D: qpAdm analysis of Neolithic European groups using two-way mixture model
Sources: WHG and Anatolian_farmers
Outgroups: O7 (Mbuti Pygmies, Ethiopian Mota, Russian Ust’ Ishim HG, Russian Mal’ta HG, Papuan, Onge, and Han) and Italy North Villabruna HG
Target	WHG	Anatolian_farmers	SE_WHG	SE_Anatolian farmers	p-value	comment	Alternate models (including additional sources EHG or GoyetQ2 HG)
France_HautsDeFrance_EN.SG	-0.047	1.047	0.035	0.035	0.168755
Hungary_EN_Starcevo*	0.006	0.994	0.027	0.027	0.668265
Germany_EN_LBK_Stuttgart_published.DG	0.008	0.992	0.019	0.019	0.685344
Italy_N.SG	0.008	0.992	0.009	0.009	0.125884
France_GrandEst_EN.SG	0.023	0.977	0.022	0.022	0.170116
Hungary_MN_Vinca	0.025	0.975	0.018	0.018	0.881488
Balkans_EN	0.03	0.97	0.009	0.009	0.108375
Hungary_MN_ALPc.SG	0.036	0.964	0.021	0.021	0.448226
Hungary_MN_LBK	0.039	0.961	0.011	0.011	0.0613592
Balkans_MN	0.042	0.958	0.012	0.012	0.145737
Balkans_N	0.043	0.957	0.009	0.009	0.382579
Czech_Megalithic.SG	0.046	0.954	0.022	0.022	0.779397
Hungary_MN_ALPc_published.SG	0.051	0.949	0.035	0.035	0.684691
Austria_EN_LBK	0.058	0.942	0.009	0.009	0.633538
Hungary_LN_Sopot	0.059	0.941	0.016	0.016	0.0681623
Germany_EN_LBK	0.06	0.94	0.007	0.007	0.052383
Hungary_MN_LBK.SG	0.065	0.935	0.021	0.021	0.303828
Czech_N	0.071	0.929	0.015	0.015	0.278779
Balkans_C*	0.079	0.921	0.01	0.01	0.727805
Hungary_Baden_LateCA.SG	0.079	0.921	0.021	0.021	0.076259
Poland_BKG.SG	0.083	0.917	0.01	0.01	0.011961	p-value<0.05
Hungary_EarlyC_Tiszapolgar	0.085	0.915	0.017	0.017	0.948109
Hungary_LN_Lengyel	0.086	0.914	0.013	0.013	0.013		0.075 ± 0.027 WHG; 0.897 ± 0.075 ANF ; 0.029 ± 0.095 GoyetQ2 (P-value: 0.156787)
Hungary_LN_Tisza	0.088	0.912	0.016	0.016	0.806843
Spain_EN.SG	0.093	0.907	0.014	0.014	0.648056
Spain_EN	0.095	0.905	0.01	0.01	0.547808
Hungary_C_Balaton_Lasinja	0.099	0.901	0.014	0.014	0.0195264	p-value<0.05
Germany_N_published	0.104	0.896	0.036	0.036	0.62313
Hungary_MN_ALPc_published	0.105	0.895	0.022	0.022	0.182371
Hungary_MN_ALPc_Szatmar*	0.106	0.894	0.049	0.049	0.550262
Hungary_MN_ALPc_Szakalhat	0.113	0.887	0.017	0.017	0.0978237
Hungary_MN_ALPc_Esztar	0.115	0.885	0.032	0.032	0.646162
Hungary_MN_ALPc_Tiszadob	0.117	0.883	0.013	0.013	0.262168
France_MN_OBN_C	0.119	0.881	0.012	0.012	0.632808
Hungary_MN_ALPc	0.119	0.881	0.011	0.011	0.251252
France_Alsace_Lingolsheim_MN	0.125	0.875	0.018	0.018	0.101472
Italy_C.SG	0.125	0.875	0.013	0.013	0.0685969
Italy_North_Remedello_C.SG	0.125	0.875	0.031	0.031	0.636735
Ukraine_Eneolithic_Trypillia	0.125	0.875	0.019	0.019	0.297002
France_HautsDeFrance_LN.SG#	0.126	0.874	0.037	0.037	1.74783e-08	p-value<0.05	0.018 ± 0.040 WHG ;0.514 ± 0.064 ANF ; 0.468 ± 0.071 EHG (P-value: 0.543455)
Hungary_MN_ALPc_Bukk	0.129	0.871	0.022	0.022	0.571367
Hungary_EarlyC_Tiszapolgar_Bodrogkeresztur_published	0.13	0.87	0.022	0.022	0.0114972	p-value<0.05	0.109 ± 0.023 WHG ; 0.795 ± 0.038 ANF ; 0.096 ± 0.041 EHG (P-value: 0.0529547)
Hungary_MN	0.131	0.869	0.021	0.021	0.233747
Italy_Sicily_MN*	0.131	0.869	0.016	0.016	0.238701
Hungary_MN_ALPc_Bukk.SG	0.132	0.868	0.038	0.038	0.843825
France_Occitanie_MN.SG	0.136	0.864	0.025	0.025	0.842571
Hungary_LateC_Protoboleraz	0.137	0.863	0.016	0.016	0.285235
Hungary_MN_ALBK_Szakalhat	0.137	0.863	0.02	0.02	0.767736
Hungary_LateC_Baden	0.14	0.86	0.009	0.009	0.155937
Italy_C_BA.SG	0.142	0.858	0.016	0.016	0.142611
France_MN_FLR	0.143	0.857	0.01	0.01	0.210921
France_GrandEst_MN.SG	0.147	0.853	0.011	0.011	0.557052
Spain_MN.SG	0.153	0.847	0.021	0.021	0.0945507
Poland_TRB.SG	0.157	0.843	0.016	0.016	0.393547
Germany_MN_Esperstedt	0.158	0.842	0.022	0.022	0.194186
Hungary_Hunyadihalom_MCHA	0.161	0.839	0.024	0.024	0.215654
France_MN_GRG	0.163	0.837	0.008	0.008	0.008		0.152 ± 0.016 WHG ; 0.822 ± 0.043 ANF ; 0.026 ± 0.055 GoyetQ2 (P-value: 0.187328)
France_MN* °	0.164	0.836	0.007	0.007	0.182366
Portugal_LN_C.SG	0.166	0.834	0.014	0.014	0.0569705
Germany_MN_Salzmuende	0.169	0.831	0.032	0.032	0.905843
Gibraltar_EN	0.171	0.829	0.025	0.025	0.206888
Ireland_EN.SG	0.174	0.826	0.013	0.013	0.2376
Ireland_N.SG	0.176	0.824	0.021	0.021	0.141453
Italy_Sardinia_N	0.178	0.822	0.011	0.011	0.552178
France_MN_PRI	0.18	0.82	0.018	0.018	0.018		0.153 ± 0.043 WHG ;0.738 ± 0.133 ANF ;0.11 ± 0.167 GoyetQ2 (P-value: 0.0984565)
Ireland_EN_MN.SG	0.18	0.82	0.012	0.012	0.012		0.178 ± 0.025 WHG ; 0.799 ± 0.072 ANF ;0.023 ± 0.091 GoyetQ2 (P-value: 0.128338)
Ireland_LN.SG	0.181	0.819	0.011	0.011	0.457605
Portugal_MN.SG*	0.184	0.816	0.013	0.013	0.130362
Spain_C.SG	0.188	0.812	0.013	0.013	0.237236
Czech_Baalberge	0.193	0.807	0.023	0.023	0.863384
Ireland_MN.SG	0.199	0.801	0.007	0.007	0.00450741	p-value<0.05
Poland_Mierzanowice_GAC.SG	0.2	0.8	0.026	0.026	0.441136
Wales_N	0.2	0.8	0.017	0.017	0.0146157	p-value<0.05
France_Occitanie_LN.SG	0.204	0.796	0.028	0.028	0.771809
Scotland_Megalithic.SG	0.206	0.794	0.017	0.017	0.0983855
Poland_Koszyce_GAC.SG	0.21	0.79	0.01	0.01	0.293467
Germany_MN_Baalberge	0.212	0.788	0.019	0.019	0.48793
Poland_Ksiaznice_GAC.SG	0.212	0.788	0.016	0.016	0.131648
Poland_Sandomierz_GAC.SG	0.212	0.788	0.019	0.019	0.863205
Sweden_Ansarve_Megalithic.SG*	0.214	0.786	0.015	0.015	0.108089
Spain_LN.SG	0.217	0.783	0.023	0.023	0.0725571
Portugal_C	0.219	0.781	0.009	0.009	0.249823
Switzerland_LN	0.222	0.778	0.007	0.007	0.00441524	p-value<0.05
England_N.SG*	0.226	0.774	0.008	0.008	0.0960895
Sweden_TRB_MN.SG	0.226	0.774	0.021	0.021	0.0958018
France_EN_MN ⊳	0.227	0.773	0.013	0.013	0.30544
France_ENMN_LBR_A	0.227	0.773	0.013	0.013	0.30544
England_N*	0.237	0.763	0.009	0.009	0.112381
Scotland_N*	0.239	0.761	0.007	0.007	0.0557603
Spain_MLN	0.24	0.76	0.007	0.007	0.007		0.225 ± 0.012 WHG ; 0.716 ± 0.037 ANF ; 0.059 ± 0.046 GoyetQ2 (P-value: 0.524214)
Poland_Globular_Amphora	0.241	0.759	0.014	0.014	0.705322
Spain_C	0.241	0.759	0.007	0.007	0.244444
Ukraine_Globular_Amphora	0.241	0.759	0.017	0.017	0.135072
France_MN_OBN_A	0.242	0.758	0.013	0.013	0.954562
Sweden_TRB_MN	0.242	0.758	0.022	0.022	0.400861
France_HautsDeFrance_MN.SG	0.248	0.752	0.022	0.022	0.298945
France_EN_PEN_A	0.253	0.747	0.018	0.018	0.331281
Ukraine_Eneolithic#	0.32	0.68	0.021	0.021	1.10614e-18	p-value<0.05	0.224 ± 0.021 WHG ; 0.451 ± 0.030 ANF ; 0.325 ± 0.033 EHG (P-value: 0.433755)
France_ENMN_LBR_B	0.364	0.636	0.025	0.025	0.546786
France_EN ⊢	0.397	0.603	0.018	0.018	0.381616
France_MN_OBN_B	0.398	0.602	0.022	0.022	0.64812
Sweden_PWC.SG*#	0.456	0.544	0.076	0.076	0.0994498
France_EN_PEN_B	0.479	0.521	0.024	0.024	0.763257
Germany_Blatterhohle_MN*	0.531	0.469	0.039	0.039	0.296277
* marked target groups are pooled based on best fitting qpadm per single samples. Details of samples excluded for this analysis are shown in Table S9.
# marked groups show higher affinity to Steppe pastoralists groups compared to Anatolian Farmers evaluated using D-statistics, hence excluded for admixture dating.
° France_MN samples are sub divided per region - France_MN_GRG, France_MN_OBN_A, France_MN_OBN_B, France_MN_OBN_C, France_MN_PRI
⊳ France_EN_MN samples are sub divided into regions- France_ENMN_LBR_A and France_ENMN_LBR_B
⊢ France_EN samples are sub divided into regions- France_EN_PEN_A and France_EN_PEN_B

## Sheet: Table E qpAdm_Neolithic-perIND
Table E: qpAdm analysis of Neolithic European groups per individual.
Sources: WHG and Anatolian_farmers
Outgroups: O7 (Mbuti Pygmies, Ethiopian Mota, Russian Ust’ Ishim HG, Russian Mal’ta HG, Papuan, Onge, and Han) and Italy North Villabruna HG
a) Analysis per-individual								b) Group-wise analysis after excluding outliers detected in (a)
Group	Instance ID	WHG	Anatolian _farmers	SE_WHG	SE_Anatolian_farmers	p-value		Group	Instance ID	WHG	Anatolian_farmers	SE_WHG	SE_Anatolian_farmers	p-value
Balkans_C	I4089	0.072	0.928	0.021	0.021	0.183141		Balkans_C	ANI152, ANI159-ANI181, I2427, I0785, I0781, I4088, I4089, I2423, I2425, I2526, I2792	0.079	0.921	0.01	0.01	0.727805
Balkans_C	ANI152	0.071	0.929	0.066	0.066	0.244331		Balkans_EN	I1131, I2532, I5072	0.03	0.97	0.012	0.012	0.108375
Balkans_C	I2423	0.082	0.918	0.023	0.023	0.943406		England_N	I2605, I3005, I5366, I5374, I6750, I6751, I6753, I6757, I6759, I6760, I6761, I2606, I0519, I0520, I0518	0.237	0.763	0.009	0.009	0.112381
Balkans_C	I2424	0.078	0.922	0.021	0.021	0.0424231		England_N.SG	SB338B2_lib.SG, SB379D2_lib.SG, I5374.SG, I3040.SG, SB603A_lib.SG, I6746.SG, I6750.SG, I6751.SG, I6753.SG, I6755.SG, I6757.SG, I6759.SG, I6760.SG, I6761.SG, I6762.SG	0.226	0.774	0.008	0.008	0.0960895
Balkans_C	I2425	0.103	0.897	0.028	0.028	0.39241		France_MN	FLR001, FLR002, FLR003, FLR005, FLR007, FLR010, FLR013, FLR014, GRG003, GRG008, GRG015, GRG016, GRG019, GRG021, GRG022, GRG023, GRG025, GRG027, GRG028, GRG032, GRG035, GRG043, GRG047, GRG049, GRG050, GRG052, GRG056, GRG057, OBN002, OBN004, OBN005, OBN006, OBN007, OBN008, OBN009, OBN010, OBN011, PRI001, PRI005, PRI006	0.164	0.836	0.007	0.007	0.182366
Balkans_C	I2430	0.053	0.947	0.021	0.021	0.00626113		Germany_Blatterhohle_MN	I1594	0.531	0.469	0.039	0.039	0.296277
Balkans_C	I2526	0.029	0.971	0.022	0.022	0.864989		Hungary_MN_ALPc_Szatmar	I2382	0.106	0.894	0.049	0.049	0.550262
Balkans_C	I2792	0.047	0.953	0.029	0.029	0.204929		Hungary_EN_Starcevo	I1876	0.006	0.994	0.027	0.027	0.668265
Balkans_C	ANI160	0.07	0.93	0.047	0.047	0.0103681		Italy_Sicily_MN	I4065, I4064	0.131	0.869	0.016	0.016	0.238701
Balkans_C	ANI159-ANI181	0.104	0.896	0.023	0.023	0.194688		Portugal_MN.SG	LugarCanto42.SG, LugarCanto44.SG, LugarCanto45.SG, LU339.SG	0.184	0.816	0.013	0.013	0.130362
Balkans_C	I2427	0.067	0.933	0.021	0.021	0.575248		Scotland_N	I7554, I2980, I2988, I3136, I3138, I2977, I2978, I3133, I2979, I3134, I2630, I2631, I2633, I2635, I2637, I2650, I2651, I2659, I2932, I2933, I2934, I2935, I3085, I5370, I5371, I6764, I6766, I2657	0.239	0.761	0.007	0.007	0.0557603
Balkans_C	I2431	0.076	0.924	0.02	0.02	0.0144931		Sweden_Ansarve_Megalithic.SG	ans003.SG, ans005.SG, ans008.SG, ans014.SG, ans016.SG	0.214	0.786	0.015	0.015	0.108089
Balkans_C	I0785	0.012	0.988	0.044	0.044	0.362349		Sweden_Late_N.SG	oll010.SG	0.174	0.826	0.037	0.037	0.290479
Balkans_C	I0781	0.011	0.989	0.023	0.023	0.0703861		Sweden_PWC.SG	Ajvide53.SG	0.456	0.544	0.076	0.076	0.0994498
Balkans_C	I4088	0.107	0.893	0.02	0.02	0.329601
Balkans_EN	I0633	-0.016	1.016	0.021	0.021	0.49383	infeasible
Balkans_EN	I0634	-0.025	1.025	0.019	0.019	0.37554	infeasible
Balkans_EN	I1131	0.041	0.959	0.021	0.021	0.286262
Balkans_EN	I2532	0.026	0.974	0.021	0.021	0.195013
Balkans_EN	I2533	0	1	0.02	0.02	0.31409	infeasible
Balkans_EN	I4918	0.083	0.917	0.021	0.021	0.0269007
Balkans_EN	I5071	0.014	0.986	0.022	0.022	0.0292351
Balkans_EN	I5072	0.009	0.991	0.02	0.02	0.274887
England_N	I6757	0.25	0.75	0.022	0.022	0.699851
England_N	I2605	0.223	0.777	0.023	0.023	0.0504399
England_N	I6759	0.22	0.78	0.021	0.021	0.868793
England_N	I6760	0.197	0.803	0.023	0.023	0.353886
England_N	I6761	0.241	0.759	0.023	0.023	0.584651
England_N	I2606	0.247	0.753	0.023	0.023	0.76022
England_N	I0519	0.226	0.774	0.04	0.04	0.414855
England_N	I0520	0.326	0.674	0.084	0.084	0.981525
England_N	I0518	0.08	0.92	0.053	0.053	0.195546
England_N	I3005	0.265	0.735	0.023	0.023	0.341712
England_N	I5366	0.196	0.804	0.023	0.023	0.263572
England_N	I5374	0.248	0.752	0.055	0.055	0.978835
England_N	I6746	0.254	0.746	0.022	0.022	0.0239464
England_N	I6747	0.241	0.759	0.022	0.022	0.0398859
England_N	I6750	0.209	0.791	0.023	0.023	0.595556
England_N	I6751	0.246	0.754	0.023	0.023	0.646704
England_N	I6753	0.218	0.782	0.023	0.023	0.182905
England_N.SG	I6751.SG	0.233	0.767	0.022	0.022	0.351013
England_N.SG	SB338B2_lib.SG	0.259	0.741	0.024	0.024	0.277654
England_N.SG	I6753.SG	0.218	0.782	0.022	0.022	0.24814
England_N.SG	I6755.SG	0.215	0.785	0.024	0.024	0.653916
England_N.SG	I6757.SG	0.248	0.752	0.022	0.022	0.784833
England_N.SG	I6759.SG	0.23	0.77	0.022	0.022	0.832604
England_N.SG	I6760.SG	0.173	0.827	0.022	0.022	0.303125
England_N.SG	I6761.SG	0.232	0.768	0.023	0.023	0.692909
England_N.SG	I6762.SG	0.234	0.766	0.023	0.023	0.423664
England_N.SG	SB379D2_lib.SG	0.215	0.785	0.025	0.025	0.312189
England_N.SG	I5374.SG	0.238	0.762	0.057	0.057	0.997778
England_N.SG	I3040.SG	0.257	0.743	0.033	0.033	0.11014
England_N.SG	SB603A_lib.SG	0.204	0.796	0.023	0.023	0.321013
England_N.SG	I5387.SG	0.215	0.785	0.025	0.025	0.0377552
England_N.SG	I6746.SG	0.234	0.766	0.022	0.022	0.0763366
England_N.SG	I6747.SG	0.23	0.77	0.022	0.022	0.0219173
England_N.SG	I6750.SG	0.225	0.775	0.023	0.023	0.663469
France_MN	GRG003	0.166	0.834	0.023	0.023	0.249213
France_MN	FLR001	0.226	0.774	0.013	0.013	0.566698
France_MN	GRG008	0.193	0.807	0.023	0.023	0.138667
France_MN	GRG015	0.163	0.837	0.023	0.023	0.734775
France_MN	GRG016	0.153	0.847	0.021	0.021	0.0565609
France_MN	GRG018	0.147	0.853	0.024	0.024	0.0104166
France_MN	GRG019	0.161	0.839	0.022	0.022	0.104185
France_MN	GRG021	0.168	0.832	0.023	0.023	0.320055
France_MN	GRG022	0.184	0.816	0.023	0.023	0.147028
France_MN	GRG023	0.2	0.8	0.025	0.025	0.439084
France_MN	GRG025	0.154	0.846	0.022	0.022	0.878072
France_MN	GRG027	0.167	0.833	0.022	0.022	0.219202
France_MN	FLR002	0.175	0.825	0.024	0.024	0.258609
France_MN	GRG028	0.152	0.848	0.022	0.022	0.402915
France_MN	GRG032	0.132	0.868	0.023	0.023	0.6523
France_MN	GRG035	0.165	0.835	0.022	0.022	0.9975
France_MN	GRG041	0.143	0.857	0.024	0.024	0.0470117
France_MN	GRG043	0.119	0.881	0.022	0.022	0.629167
France_MN	GRG047	0.135	0.865	0.026	0.026	0.21415
France_MN	GRG049	0.152	0.848	0.04	0.04	0.366891
France_MN	GRG050	0.221	0.779	0.025	0.025	0.194876
France_MN	GRG052	0.155	0.845	0.023	0.023	0.518736
France_MN	GRG056	0.165	0.835	0.026	0.026	0.62675
France_MN	FLR003	0.136	0.864	0.023	0.023	0.913564
France_MN	GRG057	0.185	0.815	0.023	0.023	0.0700145
France_MN	OBN002	0.233	0.767	0.025	0.025	0.238914
France_MN	OBN004	0.108	0.892	0.023	0.023	0.0528444
France_MN	OBN005	0.228	0.772	0.025	0.025	0.349215
France_MN	OBN006	0.159	0.841	0.024	0.024	0.859946
France_MN	OBN007	0.117	0.883	0.022	0.022	0.581449
France_MN	OBN008	0.245	0.755	0.022	0.022	0.614715
France_MN	OBN009	0.075	0.925	0.021	0.021	0.739435
France_MN	OBN010	0.239	0.761	0.024	0.024	0.564131
France_MN	OBN011	0.132	0.868	0.023	0.023	0.75886
France_MN	FLR004	0.159	0.841	0.022	0.022	0.00742534
France_MN	PRI001	0.16	0.84	0.023	0.023	0.0592878
France_MN	PRI005	0.182	0.818	0.042	0.042	0.793309
France_MN	PRI006	0.224	0.776	0.026	0.026	0.0950569
France_MN	FLR005	0.111	0.889	0.022	0.022	0.21749
France_MN	FLR007	0.143	0.857	0.022	0.022	0.825839
France_MN	FLR010	0.18	0.82	0.026	0.026	0.832936
France_MN	FLR013	0.148	0.852	0.025	0.025	0.596482
France_MN	FLR014	0.113	0.887	0.024	0.024	0.210488
Germany_Blatterhohle_MN	I1593	0.422	0.578	0.025	0.025	0.0397003
Germany_Blatterhohle_MN	I1594	0.531	0.469	0.039	0.039	0.296277
Hungary_MN_ALPc_Szatmar	I2380	0.09	0.91	0.021	0.021	0.0451417
Hungary_MN_ALPc_Szatmar	I2382	0.106	0.894	0.049	0.049	0.550262
Hungary_EN_Starcevo	I0174	0.01	0.99	0.03	0.03	0.03991
Hungary_EN_Starcevo	I1876	0.006	0.994	0.027	0.027	0.668265
Hungary_EN_Starcevo	I1880	-0.007	1.007	0.019	0.019	0.394788	infeasible
Italy_Sicily_MN	I4062	0.098	0.902	0.021	0.021	0.01031
Italy_Sicily_MN	I4065	0.163	0.837	0.022	0.022	0.0545192
Italy_Sicily_MN	I4063	0.117	0.883	0.02	0.02	0.0371324
Italy_Sicily_MN	I4064	0.093	0.907	0.021	0.021	0.482858
Portugal_MN.SG	LugarCanto41.SG	0.206	0.794	0.024	0.024	0.0450953
Portugal_MN.SG	LugarCanto42.SG	0.188	0.812	0.021	0.021	0.172508
Portugal_MN.SG	LugarCanto44.SG	0.201	0.799	0.021	0.021	0.484587
Portugal_MN.SG	LugarCanto45.SG	0.209	0.791	0.043	0.043	0.211414
Portugal_MN.SG	LD270.SG	0.173	0.827	0.022	0.022	0.021844
Portugal_MN.SG	LU339.SG	0.166	0.834	0.021	0.021	0.352908
Scotland_N	I3133	0.222	0.778	0.023	0.023	0.616488
Scotland_N	I7554	0.205	0.795	0.021	0.021	0.577631
Scotland_N	I2979	0.197	0.803	0.022	0.022	0.268731
Scotland_N	I3134	0.264	0.736	0.023	0.023	0.524614
Scotland_N	I2630	0.238	0.762	0.022	0.022	0.774071
Scotland_N	I2631	0.202	0.798	0.022	0.022	0.588843
Scotland_N	I2633	0.255	0.745	0.022	0.022	0.16338
Scotland_N	I2635	0.222	0.778	0.023	0.023	0.192913
Scotland_N	I2637	0.215	0.785	0.023	0.023	0.182237
Scotland_N	I2650	0.249	0.751	0.023	0.023	0.804747
Scotland_N	I2651	0.218	0.782	0.022	0.022	0.287508
Scotland_N	I2659	0.25	0.75	0.023	0.023	0.388355
Scotland_N	I2634	0.246	0.754	0.024	0.024	0.00990657
Scotland_N	I2932	0.259	0.741	0.022	0.022	0.249718
Scotland_N	I2933	0.269	0.731	0.022	0.022	0.905899
Scotland_N	I2934	0.226	0.774	0.022	0.022	0.391298
Scotland_N	I2935	0.21	0.79	0.02	0.02	0.657122
Scotland_N	I3085	0.217	0.783	0.023	0.023	0.968645
Scotland_N	I5370	0.204	0.796	0.05	0.05	0.474817
Scotland_N	I5371	0.26	0.74	0.027	0.027	0.778773
Scotland_N	I6764	0.217	0.783	0.026	0.026	0.480893
Scotland_N	I6766	0.213	0.787	0.023	0.023	0.758371
Scotland_N	I2657	0.217	0.783	0.033	0.033	0.0853387
Scotland_N	I2636	0.242	0.758	0.023	0.023	0.00798827
Scotland_N	I2980	0.202	0.798	0.022	0.022	0.118453
Scotland_N	I2988	0.217	0.783	0.022	0.022	0.979055
Scotland_N	I3136	0.205	0.795	0.023	0.023	0.245173
Scotland_N	I3138	0.239	0.761	0.022	0.022	0.250577
Scotland_N	I2977	0.262	0.738	0.021	0.021	0.0566978
Scotland_N	I2978	0.259	0.741	0.022	0.022	0.0564809
Spain_MLN	I7643	0.172	0.828	0.032	0.032	0.0175583
Spain_MLN	I0405	0.198	0.802	0.027	0.027	0.0657891
Spain_MLN	I7644	0.216	0.784	0.025	0.025	0.663747
Spain_MLN	I7646	0.245	0.755	0.034	0.034	0.766692
Spain_MLN	I7647	0.26	0.74	0.069	0.069	0.69813
Spain_MLN	I7645	0.136	0.864	0.062	0.062	0.784828
Spain_MLN	I7547	0.199	0.801	0.045	0.045	0.232305
Spain_MLN	I7601	0.173	0.827	0.031	0.031	0.66196
Spain_MLN	I7606	0.294	0.706	0.023	0.023	0.324266
Spain_MLN	I7642	0.211	0.789	0.022	0.022	0.21138
Spain_MLN	I7604	0.267	0.733	0.023	0.023	0.00186486
Spain_MLN	I10277	0.242	0.758	0.024	0.024	0.283186
Spain_MLN	I0407	0.187	0.813	0.023	0.023	0.0640328
Spain_MLN	I10278	0.2	0.8	0.025	0.025	0.990525
Spain_MLN	I10280	0.201	0.799	0.026	0.026	0.966302
Spain_MLN	I10283	0.246	0.754	0.034	0.034	0.756978
Spain_MLN	I10284	0.288	0.712	0.034	0.034	0.321273
Spain_MLN	I10285	0.291	0.709	0.027	0.027	0.113221
Spain_MLN	I10286	0.344	0.656	0.061	0.061	0.41127
Spain_MLN	I7594	0.169	0.831	0.031	0.031	0.762497
Spain_MLN	I7598	0.131	0.869	0.024	0.024	0.926541
Spain_MLN	I8567	0.212	0.788	0.031	0.031	0.0231016
Spain_MLN	I8568	0.216	0.784	0.025	0.025	0.0861437
Spain_MLN	I0406	0.222	0.778	0.023	0.023	0.0505791
Spain_MLN	I3214	0.175	0.825	0.065	0.065	0.25897
Spain_MLN	I11300	0.294	0.706	0.045	0.045	0.885286
Spain_MLN	I11301	0.255	0.745	0.023	0.023	0.737905
Spain_MLN	I11306	0.278	0.722	0.024	0.024	0.248727
Spain_MLN	I11305	0.182	0.818	0.023	0.023	0.450163
Spain_MLN	I11303	0.207	0.793	0.043	0.043	0.794231
Spain_MLN	I8134	0.218	0.782	0.022	0.022	0.14014
Spain_MLN	I11249	0.264	0.736	0.023	0.023	0.0095955
Spain_MLN	I11248	0.306	0.694	0.024	0.024	0.11681
Spain_MLN	ELT002_merged	0.237	0.763	0.022	0.022	0.765737
Spain_MLN	I7549	0.189	0.811	0.028	0.028	0.374071
Spain_MLN	ELT006_merged	0.258	0.742	0.022	0.022	0.086129
Spain_MLN	I7550	0.287	0.713	0.024	0.024	0.205341
Spain_MLN	I7600	0.179	0.821	0.027	0.027	0.92635
Spain_MLN	I7602	0.32	0.68	0.025	0.025	0.470233
Spain_MLN	I7603	0.256	0.744	0.023	0.023	0.993476
Spain_MLN	I7605	0.247	0.753	0.027	0.027	0.656547
Sweden_Ansarve_Megalithic.SG	ans003.SG	0.23	0.77	0.038	0.038	0.10681
Sweden_Ansarve_Megalithic.SG	ans005.SG	0.165	0.835	0.043	0.043	0.183742
Sweden_Ansarve_Megalithic.SG	ans008.SG	0.222	0.778	0.022	0.022	0.157914
Sweden_Ansarve_Megalithic.SG	ans014.SG	0.203	0.797	0.023	0.023	0.165147
Sweden_Ansarve_Megalithic.SG	ans016.SG	0.249	0.751	0.034	0.034	0.137516
Sweden_Ansarve_Megalithic.SG	ans017.SG	0.242	0.758	0.023	0.023	0.0141752
Sweden_Late_N.SG	oll009.SG	0.244	0.756	0.03	0.03	2.53857e-05
Sweden_Late_N.SG	oll010.SG	0.174	0.826	0.037	0.037	0.290479
Sweden_PWC.SG	Ajvide52.SG	0.431	0.569	0.042	0.042	0.0161907
Sweden_PWC.SG	Ajvide53.SG	0.456	0.544	0.076	0.076	0.0994498
Sweden_PWC.SG	Ajvide58.SG	0.49	0.51	0.024	0.024	6.97373e-14
Sweden_PWC.SG	Ajvide70.SG	0.55	0.45	0.037	0.037	1.72615e-05
Sweden_PWC.SG	ajv54.SG	0.503	0.497	0.028	0.028	0.00114495

## Sheet: Table F Dstats_Neolithic
Table F: D-statistics to explore the affinity of the target groups to Anatolian Farmers or Steppe pastoralists
Statistic: D(Mbuti, target, Anatolian_farmers, Steppe_pastoralists) with target= Neolithic Europe and Steppe pastoralists = Russia_Samara_EBA_Yamnaya
Target	D-score (Z-score)	Target closer to Anatolian farmers/Steppe pastoralists
Austria_EN_LBK	-0.0615 (-31.193)	Anatolian_farmers
Balkans_N	-0.0509 (-27.068)	Anatolian_farmers
Balkans_EN	-0.0656 (-34.319)	Anatolian_farmers
Balkans_MN	-0.0647 (-30.478)	Anatolian_farmers
Balkans_C*	-0.0605 (-31.215)	Anatolian_farmers
Czech_Baalberge	-0.0479 (-17.579)	Anatolian_farmers
Czech_Megalithic.SG	-0.0548 (-19.028)	Anatolian_farmers
Czech_N	-0.0604 (-26.919)	Anatolian_farmers
France_Alsace_Lingolsheim_MN	-0.0579 (-23.316)	Anatolian_farmers
France_EN	-0.0311 (-12.436)	Anatolian_farmers
France_EN_MN	-0.0473 (-22.478)	Anatolian_farmers
France_GrandEst_EN.SG	-0.0613 (-20.553)	Anatolian_farmers
France_GrandEst_MN.SG	-0.0501 (-25.136)	Anatolian_farmers
France_HautsDeFrance_EN.SG	-0.0595 (-13.572)	Anatolian_farmers
France_HautsDeFrance_LN.SG	0.0359 (8.660)	Steppe_pastoralists
France_HautsDeFrance_MN.SG	-0.0466 (-16.559)	Anatolian_farmers
France_MN*	-0.0509 (-28.817)	Anatolian_farmers
France_Occitanie_LN.SG	-0.0435 (-12.909)	Anatolian_farmers
France_Occitanie_MN.SG	-0.0453 (-14.743)	Anatolian_farmers
Germany_N_published	-0.0602 (-15.214)	Anatolian_farmers
Germany_EN_LBK	-0.0602 (-33.448)	Anatolian_farmers
Germany_EN_LBK_Stuttgart_published.DG	-0.0544 (-21.357)	Anatolian_farmers
Germany_MN_Baalberge	-0.0453 (-17.976)	Anatolian_farmers
Germany_Blatterhohle_MN*	-0.0201 (-7.786)	Anatolian_farmers
Germany_MN_Esperstedt	-0.0496 (-18.583)	Anatolian_farmers
Germany_MN_Salzmuende	-0.0456 (-12.366)	Anatolian_farmers
Gibraltar_EN	-0.0512 (-15.921)	Anatolian_farmers
Hungary_Baden_LateCA.SG	-0.0449 (-15.908)	Anatolian_farmers
Hungary_C_Balaton_Lasinja	-0.0544 (-25.066)	Anatolian_farmers
Hungary_EarlyC_Tiszapolgar	-0.0567 (-24.192)	Anatolian_farmers
Hungary_EarlyC_Tiszapolgar_Bodrogkeresztur_published	-0.0545 (-20.902)	Anatolian_farmers
Hungary_EN_Starcevo*	-0.0644 (-27.525)	Anatolian_farmers
Hungary_Hunyadihalom_MCHA	-0.0515 (-18.337)	Anatolian_farmers
Hungary_LateC_Baden	-0.0522 (-27.860)	Anatolian_farmers
Hungary_LateC_Protoboleraz	-0.0438 (-18.946)	Anatolian_farmers
Hungary_LN_Lengyel	-0.0582 (-28.678)	Anatolian_farmers
Hungary_LN_Sopot	-0.0600 (-25.526)	Anatolian_farmers
Hungary_LN_Tisza	-0.0537 (-23.567)	Anatolian_farmers
Hungary_MN	-0.0533 (-19.764)	Anatolian_farmers
Hungary_MN_ALBK_Szakalhat	-0.0551 (-19.667)	Anatolian_farmers
Hungary_MN_ALPc	-0.0553 (-27.884)	Anatolian_farmers
Hungary_MN_ALPc_Bukk	-0.0519 (-18.455)	Anatolian_farmers
Hungary_MN_ALPc_Bukk.SG	-0.0477 (-10.353)	Anatolian_farmers
Hungary_MN_ALPc_Esztar	-0.0515 (-12.890)	Anatolian_farmers
Hungary_MN_ALPc_published	-0.0563 (-20.225)	Anatolian_farmers
Hungary_MN_ALPc_published.SG	-0.0491 (-12.774)	Anatolian_farmers
Hungary_MN_ALPc.SG	-0.0547 (-19.441)	Anatolian_farmers
Hungary_MN_ALPc_Szakalhat	-0.0526 (-21.189)	Anatolian_farmers
Hungary_MN_ALPc_Szatmar*	-0.0583 (-21.158)	Anatolian_farmers
Hungary_MN_ALPc_Tiszadob	-0.0554 (-26.300)	Anatolian_farmers
Hungary_MN_LBK	-0.0629 (-29.152)	Anatolian_farmers
Hungary_MN_LBK.SG	-0.0502 (-18.773)	Anatolian_farmers
Hungary_MN_Vinca	-0.0608 (-24.135)	Anatolian_farmers
Italy_C_BA.SG	-0.0497 (-22.322)	Anatolian_farmers
Italy_C.SG	-0.0520 (-24.004)	Anatolian_farmers
Italy_North_Remedello_C.SG	-0.0464 (-12.943)	Anatolian_farmers
Italy_N.SG	-0.0578 (-30.081)	Anatolian_farmers
Italy_Sardinia_N	-0.0526 (-25.449)	Anatolian_farmers
Italy_Sicily_MN*	-0.0555 (-27.425)	Anatolian_farmers
Poland_Globular_Amphora	-0.0411 (-18.072)	Anatolian_farmers
Poland_Koszyce_GAC.SG	-0.0382 (-19.208)	Anatolian_farmers
Poland_Ksiaznice_GAC.SG	-0.0379 (-16.698)	Anatolian_farmers
Poland_Mierzanowice_GAC.SG	-0.0407 (-13.155)	Anatolian_farmers
Poland_Sandomierz_GAC.SG	-0.0409 (-17.121)	Anatolian_farmers
Poland_BKG.SG	-0.0514 (-26.710)	Anatolian_farmers
Poland_TRB.SG	-0.0457 (-20.222)	Anatolian_farmers
Portugal_C	-0.0424 (-22.473)	Anatolian_farmers
Portugal_LN_C.SG	-0.0406 (-18.313)	Anatolian_farmers
Portugal_MN.SG*	-0.0420 (-21.104)	Anatolian_farmers
England_N*	-0.0461 (-25.691)	Anatolian_farmers
Scotland_Megalithic.SG	-0.0452 (-19.078)	Anatolian_farmers
Scotland_N*	-0.0463 (-25.780)	Anatolian_farmers
Wales_N	-0.0446 (-19.590)	Anatolian_farmers
Ireland_EN_MN.SG	-0.0463 (-23.317)	Anatolian_farmers
Ireland_EN.SG	-0.0451 (-22.033)	Anatolian_farmers
Ireland_LN.SG	-0.0434 (-21.817)	Anatolian_farmers
Ireland_MN.SG	-0.0450 (-25.436)	Anatolian_farmers
Ireland_N.SG	-0.0445 (-16.160)	Anatolian_farmers
Spain_C	-0.0429 (-24.089)	Anatolian_farmers
Spain_C.SG	-0.0399 (-19.062)	Anatolian_farmers
Spain_EN	-0.0559 (-28.747)	Anatolian_farmers
Spain_EN.SG	-0.0525 (-23.430)	Anatolian_farmers
Spain_LN.SG	-0.0453 (-15.317)	Anatolian_farmers
Spain_MLN	-0.0442 (-24.748)	Anatolian_farmers
Spain_MN.SG	-0.0412 (-15.207)	Anatolian_farmers
Sweden_Ansarve_Megalithic.SG*	-0.0378 (-17.732)	Anatolian_farmers
Sweden_Late_N.SG*	0.0066 (2.229)	Steppe_pastoralists
Sweden_PWC.SG*	0.0239 (9.914)	Steppe_pastoralists
Sweden_TRB_MN	-0.0433 (-15.543)	Anatolian_farmers
Sweden_TRB_MN.SG	-0.0381 (-14.265)	Anatolian_farmers
Switzerland_LN	-0.0461 (-25.260)	Anatolian_farmers
Ukraine_Eneolithic	0.0211 (8.426)	Steppe_pastoralists
Ukraine_Eneolithic_Trypillia	-0.0405 (-15.827)	Anatolian_farmers
Ukraine_Globular_Amphora	-0.0411 (-17.508)	Anatolian_farmers

## Sheet: Table G Early Steppepastoralist
Table G: qpAdm analysis of Early Steppe pastoralists.
Sources: EHG_pooled and Iran_N_pooled
Outgroups: O7 (Mbuti Pygmies, Ethiopian Mota, Russian Ust’ Ishim HG, Russian Mal’ta HG, Papuan, Onge, and Han)
Target	EHG pooled	Iran_N_pooled	SE_EHG_pooled	SE_Iran_N_pooled	p-value
Russia_Samara_EBA_Yamnaya	0.643	0.357	0.024	0.024	0.055
Russia_Afanasievo	0.658	0.342	0.021	0.021	0.285
Ukraine_EBA_Yamnaya	0.664	0.336	0.055	0.055	0.6989
Ukraine_Ozera_EBA_Yamnaya	0.399	0.601	0.058	0.058	0.538
Russia_Caucasus_EBA_Yamnaya	0.567	0.433	0.039	0.039	0.099
Kazakhstan_EBA_Yamnaya.SG	0.708	0.292	0.054	0.054	0.362
Hungary_LateC_EBA_Baden_Yamnaya	-0.142	1.142	0.042	0.042	0.252
Russia_Kalmykia_EBA_Yamnaya.SG	0.633	0.367	0.035	0.035	0.035
Note: p-values < 0.05 shown in red highlight models that were a poor fit.

## Sheet: Table H Fst in Steppe groups
Table H: Genetic distance (FST) in early Steppe pastoralists groups.
	Russia_Afanasievo	Kazakhstan_EBA_Yamnaya.SG;	Russia_Caucasus_EBA_Yamnaya	Russia_Samara_EBA_Yamnaya	Ukraine_EBA_Yamnaya	Ukraine_Ozera_EBA_Yamnaya
Russia_Afanasievo	0	0	0.004	0.006	0	0
Kazakhstan_EBA_Yamnaya.SG;	0	0	0	0	0	0
Russia_Caucasus_EBA_Yamnaya	0.004	0	0	0.003	-0.005	0
Russia_Samara_EBA_Yamnaya	0.006	0	0.003	0	0.003	0
Ukraine_EBA_Yamnaya	0	0	-0.005	0.003	0	0
Ukraine_Ozera_EBA_Yamnaya	0	0	0	0	0	0
Note: We performed smartpca using the option inbreed: YES to estimate FST across groups.

## Sheet: Table I qpAdm_Bronze Age
Table I: qpAdm analysis of Bronze Age groups using three-way mixture model
Sources: HG (WHG), Anatolian_farmers (Turkey_N), Steppe_pastoralists (Russia_Samara_EBA_Yamnaya)
Outgroups: O7 (Mbuti Pygmies, Ethiopian Mota, Russian Ust’ Ishim HG, Russian Mal’ta HG, Papuan, Onge, and Han) and Italy North Villabruna HG
Target	WHG	Anatolian_farmers	Steppe_ pastoralists	SE_WHG	SE_Anatolian_ farmers	SE_Steppe_ pastoralists	p-value	comment	#Fit using two source groups: WHG + ANF (excluding Steppe pastoralists)
Balkans_EBA	0.134	0.697	0.169	0.013	0.042	0.041	0.874433
Balkans_LBA	0.058	0.04	0.901	0.022	0.069	0.071	0.626873
Balkans_MBA	0.073	0.601	0.326	0.016	0.069	0.051	0.330408
Czech_BA_Veterov_1	0.126	0.31	0.564	0.02	0.067	0.069	0.663095
Czech_BellBeaker	0.15	0.363	0.487	0.007	0.022	0.023	0.128509
Czech_CordedWare	0.083	0.229	0.688	0.01	0.032	0.034	0.0613908
Czech_EarlySlav.SG	0.165	0.143	0.692	0.052	0.174	0.173	0.766567
Czech_EBA	0.144	0.269	0.587	0.011	0.034	0.035	0.0887376
Czech_EBA_Protounetice	0.141	0.444	0.416	0.037	0.122	0.126	0.789348		0.169WHG + 0.831ANF; p-value (0.061308)
Czech_EBA_Unetice	0.12	0.255	0.625	0.02	0.071	0.071	0.202571
France_Alsace_Lingolsheim_EBA	0.158	0.374	0.469	0.024	0.078	0.078	0.121283
France_BellBeaker	0.146	0.35	0.505	0.012	0.038	0.038	0.0963452
France_GrandEst_EBA.SG	0.122	0.378	0.5	0.013	0.047	0.046	0.138787
France_GrandEst_LBA.SG	0.102	0.442	0.456	0.037	0.114	0.117	0.571243
France_Occitanie_EBA.SG	0.12	0.431	0.45	0.024	0.074	0.074	0.144301
France_Occitanie_EMBA.SG	0.134	0.721	0.145	0.026	0.089	0.089	0.695462		0.139WHG + 0.861ANF; p-value (0.482718)
France_Occitanie_MBA.SG	0.164	0.656	0.179	0.043	0.125	0.124	0.449343		0.171WHG + 0.829ANF; p-value (0.30737)
Germany_BA.SG	0.103	0.551	0.346	0.036	0.115	0.116	0.702109		0.122WHG + 0.878ANF; p-value (0.114077)
Germany_BellBeaker	0.135	0.375	0.49	0.007	0.023	0.023	0.116236
Germany_BellBeaker_published	0.128	0.375	0.498	0.019	0.064	0.065	0.34991
Germany_BenzigerodeHeimburg_LN	0.116	0.365	0.519	0.021	0.066	0.067	0.124207
Germany_CordedWare	0.084	0.177	0.74	0.012	0.039	0.04	0.944063
Germany_CordedWare_Tauber	0.05	0.378	0.572	0.033	0.13	0.129	0.827316
Germany_CordedWare.SG*	0.113	0.356	0.531	0.056	0.161	0.165	0.384853
Germany_EBA_Unetice*	0.151	0.278	0.571	0.014	0.044	0.045	0.216561
Germany_LBA_Halberstadt_published	0.17	0.458	0.372	0.022	0.065	0.067	0.379956
Germany_Lech_BellBeaker	0.118	0.25	0.633	0.015	0.052	0.053	0.177423
Germany_Lech_EBA	0.128	0.452	0.42	0.008	0.028	0.029	0.0197364	p-value<0.05
Germany_Lech_MBA	0.121	0.527	0.351	0.017	0.062	0.062	0.0472954	p-value<0.05
Germany_LN_Alberstedt	0.126	0.275	0.599	0.022	0.065	0.068	0.645955
Germany_LN_Karsdorf	0.044	0	0.956	0.034	0.11	0.11	0.470214
Germany_SouthernGermany_Anselfingen_EBA	0.129	0.234	0.637	0.027	0.096	0.096	0.153288
Germany_SouthernGermany_Singen_EBA*	0.161	0.404	0.434	0.011	0.034	0.036	0.0893175
Hungary_EBA_BellBeaker	0.134	0.526	0.339	0.008	0.027	0.027	0.0734976
Hungary_EBA_Mako	0.268	0.349	0.382	0.023	0.071	0.073	0.332262
Hungary_EBA_Protonagyrev	0.139	0.63	0.231	0.02	0.062	0.063	0.64988
Hungary_LBA_Kyjatice	0.184	0.558	0.258	0.022	0.071	0.07	0.237291
Hungary_Maros_EBA.SG	0.008	0.813	0.179	0.019	0.061	0.059	0.489525
Hungary_MBA_Vatya.SG*	0.079	0.648	0.273	0.021	0.072	0.073	0.0819234
Switzerland_BellBeaker	0.114	0.528	0.358	0.023	0.065	0.066	0.678125
Switzerland_EBA_1*	0.171	0.801	0.028	0.023	0.078	0.079	0.394797		0.177WHG + 0.823ANF; p-value (0.605096)
Switzerland_EBA_2	0.135	0.341	0.524	0.009	0.03	0.031	0.687842
Italy_North_BellBeaker	0.12	0.743	0.137	0.015	0.044	0.043	0.417072
Italy_North_Remedello_EBA.SG	0.109	0.959	-0.068	0.03	0.1	0.101	0.180133	infeasible	0.100WHG + 0.900ANF; p-value (0.219594)
Italy_Sardinia_BA_Nuragic*	0.147	0.796	0.057	0.011	0.033	0.034	0.105735
Italy_Sardinia_EBA_Nuragic	0.176	0.748	0.076	0.022	0.067	0.067	0.0444446	p-value<0.05	0.179WHG + 0.821ANF; p-value (0.0529216)
Italy_Sardinia_EBA*	0.184	0.756	0.06	0.011	0.035	0.035	0.100521
Italy_Sardinia_LBA	0.17	0.785	0.045	0.012	0.034	0.034	0.103798		0.173WHG + 0.827ANF; p-value (0.119435)
Italy_Sardinia_LBA_published	0.242	0.593	0.165	0.055	0.185	0.18	0.398896		0.243WHG + 0.757ANF; p-value (0.387372)
Italy_Sardinia_LBA	0.17	0.785	0.045	0.012	0.034	0.034	0.103798
Italy_Sardinia_C_MonteClaro	0.18	0.843	-0.023	0.013	0.041	0.041	0.95844	infeasible	0.178 WHG + 0.822ANF; p-value (0.963289)
Italy_Sardinia_C	0.139	0.895	-0.034	0.012	0.038	0.038	0.0707065	infeasible	0.138 WHG + 0.862ANF; p-value (0.0809887)
Italy_Sardinia_IA_2	0.077	0.777	0.146	0.022	0.066	0.068	0.116624
Italy_Sicily_BellBeaker_published	0.127	0.893	-0.019	0.069	0.315	0.324	0.252885	infeasible	0.133WHG + 0.867ANF; p-value (0.379853)
Sicily_EBA	0.186	1.082	-0.268	0.104	0.537	0.575	0.616221	infeasible
Italy_Sicily_EBA	0.104	0.792	0.104	0.011	0.033	0.034	0.17286
Italy_Sicily_LBA	0.072	0.813	0.115	0.013	0.043	0.043	0.695127		0.077WHG + 0.923ANF; p-value (0.156377)
Netherlands_BA	0.167	0.356	0.477	0.016	0.05	0.052	0.310591
Netherlands_BellBeaker	0.146	0.269	0.585	0.011	0.033	0.034	0.591606
Poland_BellBeaker	0.144	0.364	0.491	0.014	0.045	0.046	0.100511
Poland_ChopiceVeseleCulture	0.116	0.248	0.636	0.017	0.052	0.053	0.122336
Poland_CordedWare_ProtoUnetice.SG	0.123	0.62	0.258	0.037	0.122	0.13	0.0396362	p-value<0.05
Poland_CWC.SG*	0.113	0.184	0.703	0.014	0.045	0.045	0.324273
Poland_EBA	0.205	0.243	0.552	0.022	0.066	0.067	0.107052
Poland_EBA_Unetice.SG	0.076	0.459	0.466	0.017	0.052	0.052	0.568374
Poland_Southeast_BellBeaker.SG*	0.119	0.428	0.453	0.026	0.087	0.088	0.684699
Poland_Southeast_CordedWare_MC.SG	0.024	0.084	0.891	0.051	0.183	0.192	0.552984
Poland_Southeast_CordedWare.SG	0.033	0.201	0.766	0.011	0.038	0.038	0.195927
Portugal_EBA	0.181	0.811	0.008	0.031	0.102	0.106	0.255365		0.181WHG + 0.819ANF; p-value (0.337659)
Portugal_MBA	0.124	0.569	0.307	0.065	0.268	0.28	0.680452		0.139WHG + 0.861ANF; p-value (0.619)
Portugal_MBA.SG	0.14	0.653	0.207	0.013	0.04	0.041	0.21719
Portugal_LBA	0.139	0.59	0.271	0.049	0.179	0.186	0.441681		0.163WHG + 0.837ANF; p-value (0.346449)
Gibraltar_EBA	0.188	0.574	0.238	0.023	0.073	0.075	0.654826
Spain_EBA	0.196	0.606	0.198	0.007	0.023	0.023	0.020748	p-value<0.05
Spain_EBA_Mallorca	0.182	0.513	0.305	0.026	0.083	0.087	0.732585
Spain_MBA_Formentera_all	0.166	0.718	0.117	0.021	0.07	0.073	0.0940871		0.175WHG + 0.825ANF; p-value (0.0578598)
Spain_BA_merged	0.175	0.622	0.203	0.011	0.033	0.034	0.310107
Latvia_BA	0.242	0.163	0.595	0.011	0.036	0.037	0.403322
Latvia_LN_CordedWare	0.016	-0.033	1.017	0.026	0.094	0.098	0.627256	p-value<0.05
Latvia_LN_CordedWare.SG	0.017	-0.092	1.075	0.034	0.119	0.121	0.560036	p-value<0.05
Lithuania_BA	0.19	0.229	0.581	0.02	0.062	0.063	0.399221
Lithuania_LBA.SG	0.284	0.454	0.262	0.113	0.26	0.324	0.468507		0.346WHG + 0.654ANF; p-value (0.512831)
Lithuania_LN	0.018	0.063	0.919	0.016	0.052	0.053	0.0911372
Estonia_BA.SG	0.192	0.202	0.606	0.012	0.04	0.04	0.0784863
Estonia_CordedWare	0.077	0.409	0.514	0.026	0.078	0.076	0.0476413	p-value<0.05
Estonia_CordedWare.SG	0.065	0.365	0.57	0.015	0.05	0.05	0.56485
Estonia_CWC.SG	0.076	0.309	0.615	0.022	0.069	0.071	0.0364042	p-value<0.05
Denmark_BA.SG	0.073	0.47	0.457	0.035	0.118	0.124	0.254557
Denmark_LBA.SG	0.087	0.602	0.311	0.041	0.138	0.137	0.19851
Denmark_LN_BA.SG	0.174	0.496	0.329	0.033	0.107	0.113	0.197893
Denmark_LN.SG*	0.034	0.384	0.582	0.085	0.311	0.287	0.71339
Denmark_MN_B.SG	0.105	0.475	0.42	0.027	0.087	0.088	0.111037
Norway_LN_BA.SG	0.26	-0.449	1.189	0.025	0.078	0.083	0.343942	infeasible
Sweden_BA.SG	0.132	0.561	0.307	0.029	0.092	0.096	0.645937		0.156WHG + 0.844ANF; p-value (0.0508899)
Sweden_BAC.SG	0.089	0.324	0.587	0.016	0.052	0.052	0.0769796
Sweden_BattleAxe.SG%	0.067	0.435	0.497	0.023	0.078	0.08	0.00915798	p-value<0.05
Sweden_Late_N.SG	0.205	0.436	0.359	0.024	0.069	0.07	0.679227
Sweden_LN.SG*	0.148	0.488	0.364	0.022	0.071	0.071	0.256165
Sweden_LNBA	0.089	0.226	0.685	0.023	0.074	0.077	0.0165802	p-value<0.05
Scotland_BellBeaker	0.15	0.327	0.523	0.017	0.051	0.051	0.774809
Scotland_C_EBA	0.16	0.283	0.557	0.013	0.041	0.041	0.626107
Scotland_MBA	0.146	0.353	0.501	0.012	0.04	0.041	0.591568
Scotland_LBA	0.165	0.336	0.5	0.012	0.041	0.042	0.348212
England_BellBeaker	0.141	0.28	0.579	0.008	0.024	0.025	0.202207
England_C_EBA	0.135	0.327	0.538	0.009	0.027	0.028	0.415747
England_MBA	0.153	0.295	0.552	0.009	0.031	0.031	0.0537071
England_LBA	0.129	0.374	0.497	0.018	0.057	0.059	0.203018
Wales_MBA_published	0.084	0.113	0.803	0.042	0.133	0.143	0.553401
England_C_EBA	0.135	0.327	0.538	0.009	0.027	0.028	0.415747
* target groups were based on significant qpadm per each individual. Details of samples excluded for this analysis are shown in Table S9
# qpadm best using two sources WHG + Anatolian Farmer (not requiring Steppe pastoralists) so these samples are excluded from dating analysis
% This sample was used for DATES analysis even when the p-value <0.05
-- indicates that the 95% CI of ancestry proportion includes 0

## Sheet: Table J qpAdm_BronzeAge-perIND
Table J: qpAdm analysis of Neolithic Bronze Age groups per individual.
ourgroups : O7 (Mbuti Pygmies, Ethiopian Mota, Russian Ust’ Ishim HG, Russian Mal’ta HG, Papuan, Onge, and Han) and Italy North Villabruna HG
a) Analysis per individual											b) Group-wise analysis after excluding outliers detected in (a)
Group	Instance ID	WHG	Anatolian_farmers	Steppe_pastoralists	SE_WHG	SE_Anatolian_farmers	SE_Steppe_ pastoralists	p-value	Comment		Group	Instance ID	WHG	Anatolian_farmers	Steppe_pastoralists	SE_WHG	SE_Anatolian_farmers	SE_Steppe_ pastoralists	p-value	comment
Denmark_LN.SG	RISE42.SG	0.034	0.384	0.582	0.085	0.311	0.287	0.71339			Denmark_LN.SG	RISE42.SG	0.034	0.384	0.582	0.085	0.311	0.287	0.71339
Denmark_LN.SG	RISE71.SG	0.098	0.523	0.379	0.029	0.11	0.111	0.00442495			Germany_CordedWare.SG	RISE435.SG	0.113	0.356	0.531	0.056	0.161	0.165	0.384853
Estonia_CordedWare	Kunila2	0.077	0.409	0.514	0.026	0.078	0.076	0.0476413			Germany_EBA_Unetice	I0115,I0117,I0804,I0803,I0116	0.151	0.278	0.571	0.014	0.044	0.045	0.216561
Estonia_CWC.SG	EKA1.SG	0.076	0.309	0.615	0.022	0.069	0.071	0.0364042			Germany_SouthernGermany_Singen_EBA	MX252,MX254,MX256,MX257,MX258,MX270,MX277,MX279,MX280	0.161	0.404	0.434	0.011	0.034	0.036	0.0893175
Germany_CordedWare.SG	RISE434.SG	0.019	0.319	0.661	0.04	0.144	0.152	0.0366611			Italy_C_BA.SG	R22.SG, R29.SG	0.152	0.825	0.023	0.018	0.056	0.057	0.0659643
Germany_CordedWare.SG	RISE435.SG	0.113	0.356	0.531	0.056	0.161	0.165	0.384853			Italy_Sardinia_BA_Nuragic	ORC003,ORC004,ORC005,ORC006,ORC007,SUA003	0.147	0.796	0.057	0.011	0.033	0.034	0.105735
Germany_CordedWare.SG	RISE436.SG	0.024	0.152	0.824	0.054	0.162	0.169	0.00867599			Italy_Sardinia_EBA	I3743,S1250,S1252,ISB001,PJU002,SUA007,SUC007,SUC009	0.184	0.756	0.06	0.011	0.035	0.035	0.100521
Germany_CordedWare.SG	RISE446.SG	-0.02	0.243	0.777	0.034	0.116	0.12	0.317453	infeasible		Poland_CWC.SG	RISE1.SG,N45.SG,N49.SG,poz44.SG,poz81.DG	0.113	0.184	0.703	0.014	0.045	0.045	0.324273
Germany_EBA_Unetice	I0115	0.146	0.202	0.652	0.025	0.08	0.081	0.973052			Poland_Southeast_BellBeaker.SG	Pcw270.SG, pcw280.SG	0.119	0.428	0.453	0.026	0.087	0.088	0.684699
Germany_EBA_Unetice	I0117	0.16	0.226	0.613	0.022	0.067	0.067	0.261409			Sweden_LN.SG	RISE97.SG, RISE179.SG	0.148	0.488	0.364	0.022	0.071	0.071	0.256165
Germany_EBA_Unetice	I0804	0.041	0.546	0.413	0.05	0.15	0.161	0.619893			Switzerland_EBA_1	RA54, TU904(SX17)	0.171	0.801	0.028	0.023	0.078	0.079	0.394797
Germany_EBA_Unetice	I0803	0.112	0.333	0.556	0.031	0.1	0.101	0.177015
Germany_EBA_Unetice	I0164	0.125	0.259	0.616	0.022	0.07	0.073	0.00660041
Germany_EBA_Unetice	I0116	0.157	0.375	0.467	0.023	0.07	0.071	0.623929
Germany_Lech_EBA	AITI_77B_d	0.13	1.054	-0.184	0.078	0.284	0.301	0.374092	infeasible
Germany_Lech_EBA	AITI_119	0.09	0.548	0.362	0.023	0.078	0.079	0.122855
Germany_Lech_EBA	AITI_78	0.158	0.388	0.454	0.022	0.065	0.067	0.0732316
Germany_Lech_EBA	AITI_92_d	0.126	0.289	0.585	0.042	0.162	0.168	0.264745
Germany_Lech_EBA	AITI_95_d	0.135	0.674	0.191	0.03	0.1	0.101	0.196732
Germany_Lech_EBA	AITI_98	0.111	0.507	0.381	0.024	0.075	0.075	0.398599
Germany_Lech_EBA	OBKR_117_d	0.135	0.303	0.562	0.045	0.16	0.16	0.851718
Germany_Lech_EBA	OBKR_2_d	0.122	0.824	0.054	0.065	0.23	0.252	0.635694
Germany_Lech_EBA	OBKR_50_d	0.218	0.518	0.264	0.032	0.1	0.102	0.480011
Germany_Lech_EBA	OBKR_66_d	0.188	0.492	0.32	0.069	0.226	0.228	0.29789
Germany_Lech_EBA	OBKR_67_d	0.09	0.541	0.369	0.058	0.238	0.243	0.661089
Germany_Lech_EBA	OBKR_80	0.134	0.403	0.463	0.021	0.068	0.067	0.848591
Germany_Lech_EBA	AITI_2	0.116	0.38	0.504	0.021	0.068	0.072	0.280536
Germany_Lech_EBA	OBKR_93_d	0.025	0.802	0.173	0.074	0.263	0.276	0.702444
Germany_Lech_EBA	OBKR_9A_d	0.131	0.32	0.549	0.044	0.125	0.131	0.551557
Germany_Lech_EBA	POST_28	0.136	0.483	0.381	0.024	0.074	0.074	0.248281
Germany_Lech_EBA	POST_35_d	0.163	0.335	0.502	0.03	0.1	0.103	0.942764
Germany_Lech_EBA	POST_99_d	0.106	0.292	0.602	0.023	0.075	0.075	0.150747
Germany_Lech_EBA	UNTA58_153	0.159	0.52	0.321	0.029	0.1	0.103	0.675164
Germany_Lech_EBA	UNTA85_1412	0.101	0.463	0.437	0.028	0.078	0.082	0.667095
Germany_Lech_EBA	WEHR_1192SkB_d	0.163	0.65	0.187	0.066	0.268	0.275	0.928773
Germany_Lech_EBA	WEHR_1586_d	0.105	0.516	0.379	0.025	0.082	0.083	0.683637
Germany_Lech_EBA	AITI_36	-0.008	0.321	0.687	0.079	0.259	0.267	0.0850842	infeasible
Germany_Lech_EBA	AITI_40	0.086	0.514	0.399	0.029	0.101	0.108	0.0118868
Germany_Lech_EBA	AITI_43	0.121	0.595	0.283	0.02	0.068	0.068	0.674567
Germany_Lech_EBA	AITI_50	0.091	0.238	0.671	0.027	0.088	0.091	0.141203
Germany_Lech_EBA	AITI_65adult_d	0.051	0.682	0.268	0.042	0.152	0.151	0.580516
Germany_Lech_EBA	AITI_66_d	0.102	0.6	0.298	0.028	0.097	0.1	0.146026
Germany_Lech_EBA	AITI_72	0.123	0.585	0.292	0.021	0.072	0.072	0.297598
Germany_Lech_MBA	OTTM_142_d	0.102	0.481	0.417	0.048	0.151	0.149	0.683171
Germany_Lech_MBA	OTTM_151ind1_d	0.164	0.577	0.259	0.057	0.17	0.18	0.894001
Germany_Lech_MBA	OTTM_151ind2_d	0.122	0.513	0.365	0.028	0.09	0.091	0.716085
Germany_Lech_MBA	OTTM_154	0.02	0.382	0.598	0.06	0.178	0.19	0.610714
Germany_Lech_MBA	OTTM_156	0.114	0.64	0.246	0.032	0.114	0.112	0.411861
Germany_Lech_MBA	OTTM_165_d	0.201	0.306	0.493	0.086	0.383	0.355	0.0514954
Germany_Lech_MBA	OTTM_87_d	0.185	0.654	0.161	0.047	0.163	0.166	0.389851
Germany_SouthernGermany_Singen_EBA	MX288	0.189	0.328	0.482	0.021	0.072	0.074	0.014075
Germany_SouthernGermany_Singen_EBA	MX252	0.143	0.549	0.308	0.025	0.078	0.081	0.212354
Germany_SouthernGermany_Singen_EBA	MX254	0.164	0.365	0.471	0.023	0.067	0.07	0.31236
Germany_SouthernGermany_Singen_EBA	MX256	0.099	0.594	0.307	0.05	0.142	0.155	0.444957
Germany_SouthernGermany_Singen_EBA	MX257	0.16	0.411	0.429	0.024	0.074	0.075	0.61055
Germany_SouthernGermany_Singen_EBA	MX258	0.157	0.485	0.358	0.029	0.097	0.1	0.969103
Germany_SouthernGermany_Singen_EBA	MX270	0.196	0.428	0.377	0.025	0.083	0.086	0.887506
Germany_SouthernGermany_Singen_EBA	MX277	0.108	0.672	0.22	0.023	0.076	0.078	0.526351
Germany_SouthernGermany_Singen_EBA	MX279	0.14	0.142	0.718	0.026	0.078	0.082	0.951461
Germany_SouthernGermany_Singen_EBA	MX280	0.171	0.26	0.569	0.022	0.071	0.074	0.116252
Italy_C_BA.SG	R22.SG	0.153	0.813	0.034	0.023	0.075	0.075	0.296681
Italy_C_BA.SG	R27.SG	0.131	0.976	-0.107	0.025	0.076	0.077	0.761547	infeasible
Italy_C_BA.SG	R29.SG	0.129	0.871	0	0.024	0.077	0.077	0.270213
Italy_North_Remedello_EBA.SG_1	RISE486.SG	0.109	0.959	-0.068	0.03	0.1	0.101	0.180133	infeasible
Italy_Sardinia_BA_Nuragic	SUA006	0.186	0.741	0.073	0.025	0.082	0.082	0.0475664
Italy_Sardinia_BA_Nuragic	ORC001	0.164	0.923	-0.087	0.021	0.065	0.065	0.230651	infeasible
Italy_Sardinia_BA_Nuragic	ORC003	0.088	0.836	0.076	0.021	0.065	0.066	0.678034
Italy_Sardinia_BA_Nuragic	ORC004	0.128	0.847	0.025	0.024	0.07	0.072	0.876229
Italy_Sardinia_BA_Nuragic	ORC005	0.139	0.772	0.089	0.021	0.066	0.067	0.215094
Italy_Sardinia_BA_Nuragic	ORC006	0.152	0.793	0.055	0.021	0.065	0.066	0.665482
Italy_Sardinia_BA_Nuragic	ORC007	0.195	0.757	0.048	0.021	0.059	0.061	0.52193
Italy_Sardinia_BA_Nuragic	ORC008	0.171	0.839	-0.01	0.021	0.067	0.068	0.0140732	infeasible
Italy_Sardinia_BA_Nuragic	ORC009	0.166	0.852	-0.018	0.022	0.066	0.066	0.450176	infeasible
Italy_Sardinia_BA_Nuragic	SUA003	0.168	0.725	0.106	0.029	0.098	0.097	0.831977
Italy_Sardinia_EBA	SUA005	0.163	0.989	-0.152	0.062	0.202	0.21	0.110197	infeasible
Italy_Sardinia_EBA	I3743	0.186	0.745	0.069	0.022	0.066	0.065	0.691252
Italy_Sardinia_EBA	SUA007	0.168	0.777	0.055	0.028	0.09	0.092	0.312746
Italy_Sardinia_EBA	SUC001	0.162	0.801	0.038	0.022	0.069	0.07	0.0199214
Italy_Sardinia_EBA	SUC003	0.182	0.849	-0.031	0.021	0.067	0.068	0.42599	infeasible
Italy_Sardinia_EBA	SUC004	0.187	0.91	-0.097	0.022	0.07	0.072	0.704869	infeasible
Italy_Sardinia_EBA	SUC005	0.209	0.778	0.013	0.022	0.068	0.068	0.0409306
Italy_Sardinia_EBA	SUC006	0.14	0.944	-0.084	0.022	0.066	0.068	0.349348	infeasible
Italy_Sardinia_EBA	SUC007	0.215	0.681	0.104	0.022	0.07	0.07	0.0711466
Italy_Sardinia_EBA	SUC009	0.178	0.794	0.028	0.023	0.065	0.066	0.0817399
Italy_Sardinia_EBA	S1249	0.117	1.031	-0.148	0.037	0.121	0.121	0.747176	infeasible
Italy_Sardinia_EBA	S1250	0.185	0.697	0.118	0.053	0.166	0.169	0.417174
Italy_Sardinia_EBA	S1252	0.179	0.783	0.038	0.024	0.075	0.077	0.392194
Italy_Sardinia_EBA	S1253	0.249	1.283	-0.532	0.066	0.187	0.205	0.850833	infeasible
Italy_Sardinia_EBA	ISB001	0.136	0.781	0.082	0.021	0.068	0.068	0.167322
Italy_Sardinia_EBA	LON001	0.174	0.891	-0.065	0.021	0.069	0.068	0.638669	infeasible
Italy_Sardinia_EBA	PJU002	0.247	0.74	0.013	0.035	0.108	0.111	0.61521
Italy_Sardinia_EBA	SUA002	0.165	0.842	-0.007	0.021	0.071	0.07	0.00211708	infeasible
Italy_Sardinia_EBA_Nuragic	ISC001	0.176	0.748	0.076	0.022	0.067	0.067	0.0444446
Norway_LN_BA.SG	VK531.SG	0.26	-0.449	1.189	0.025	0.078	0.083	0.343942	infeasible
Poland_CordedWare_ProtoUnetice.SG	RISE431.SG	0.123	0.62	0.258	0.037	0.122	0.13	0.0396362
Poland_CWC.SG	RISE1.SG	0.079	0.366	0.555	0.091	0.356	0.326	0.783491
Poland_CWC.SG	N44.SG	0.029	0.218	0.753	0.021	0.073	0.074	0.00285218
Poland_CWC.SG	N45.SG	0.074	0.276	0.649	0.022	0.068	0.071	0.349524
Poland_CWC.SG	N47.SG	0.224	0.233	0.543	0.023	0.065	0.066	0.0283401
Poland_CWC.SG	N49.SG	0.221	0.189	0.59	0.023	0.069	0.069	0.691272
Poland_CWC.SG	poz44.SG	0.007	0.039	0.953	0.052	0.21	0.219	0.0733455
Poland_CWC.SG	poz81.SG	0.017	0.045	0.938	0.023	0.074	0.075	0.170743
Poland_Southeast_BellBeaker.SG_1	pcw260.SG	0.081	0.489	0.43	0.022	0.077	0.079	0.0111482
Poland_Southeast_BellBeaker.SG_2	pcw270.SG	0.129	0.508	0.363	0.047	0.149	0.145	0.555723
Poland_Southeast_BellBeaker.SPWCG_3	pcw280.SG	0.119	0.388	0.493	0.03	0.104	0.106	0.832656
Sicily_EBA	I4383	0.186	1.082	-0.268	0.104	0.537	0.575	0.616221	infeasible
Spain_EBA	I3756	0.172	0.612	0.216	0.023	0.073	0.075	0.991514
Spain_EBA	I1310	0.201	0.555	0.244	0.025	0.081	0.082	0.0815572
Spain_EBA	I1836	0.149	0.563	0.289	0.027	0.075	0.077	0.347984
Spain_EBA	I1840	0.174	0.595	0.231	0.021	0.068	0.07	0.350901
Spain_EBA	I4562	0.203	0.529	0.268	0.022	0.068	0.069	0.665165
Spain_EBA	I6470	0.21	0.659	0.131	0.021	0.067	0.068	0.24644
Spain_EBA	I6618	0.196	0.69	0.114	0.023	0.072	0.073	0.477244
Spain_EBA	I3484	0.149	0.855	-0.004	0.043	0.151	0.148	0.675708	infeasible
Spain_EBA	I3997	0.2	0.675	0.125	0.021	0.066	0.067	0.657005
Spain_EBA	I4559	0.189	0.575	0.236	0.025	0.079	0.08	0.874228
Spain_EBA	I4560	0.152	0.567	0.281	0.022	0.066	0.067	0.289907
Spain_EBA	I4561	0.177	0.554	0.269	0.023	0.064	0.067	0.128049
Spain_EBA	I1977	0.231	0.424	0.345	0.035	0.112	0.113	0.399816
Spain_EBA	I8136	0.18	0.504	0.317	0.023	0.075	0.075	0.286717
Spain_EBA	I8144	0.193	0.58	0.226	0.037	0.142	0.144	0.0111566
Spain_EBA	I2471	0.188	0.63	0.182	0.031	0.093	0.092	0.519214
Spain_EBA	I3492	0.195	0.479	0.326	0.033	0.121	0.12	0.36115
Spain_EBA	I1312_d	0.186	0.67	0.144	0.032	0.108	0.111	0.00140101
Spain_EBA	I1313_d	0.198	0.467	0.334	0.026	0.087	0.087	0.0051754
Spain_EBA	VAD001	0.186	0.608	0.206	0.024	0.073	0.076	0.0296234
Spain_EBA	VAD002	0.14	0.711	0.15	0.039	0.133	0.13	0.34596
Spain_EBA	VAD003	0.29	0.597	0.113	0.063	0.19	0.189	0.303519
Spain_EBA	VAD004	0.159	0.815	0.026	0.027	0.085	0.087	0.0301656
Spain_EBA	I3485	0.228	0.686	0.086	0.023	0.07	0.071	0.341122
Spain_EBA	VAD005	0.205	0.733	0.062	0.024	0.078	0.079	0.261073
Spain_EBA	I12855	0.241	0.533	0.226	0.076	0.293	0.318	0.34383
Spain_EBA	I12809	0.16	0.591	0.249	0.05	0.197	0.205	0.0603644
Spain_EBA	I3486	0.088	0.675	0.237	0.056	0.185	0.195	0.865233
Spain_EBA	I3487	0.244	0.691	0.065	0.04	0.129	0.13	0.413484
Spain_EBA	I3488	0.066	0.697	0.237	0.041	0.145	0.15	0.966066
Spain_EBA	I3490	0.217	0.633	0.15	0.028	0.087	0.091	0.351727
Spain_EBA	I3491	0.12	0.795	0.085	0.039	0.134	0.139	0.359392
Spain_EBA	I3494	0.222	0.6	0.178	0.021	0.071	0.073	0.101698
Sweden_BattleAxe.SG	RISE94.SG	0.067	0.435	0.497	0.023	0.078	0.08	0.00915798
Sweden_LNBA	Olsund	0.089	0.226	0.685	0.023	0.074	0.077	0.0165802
Sweden_LN.SG	RISE97.SG	0.151	0.498	0.351	0.023	0.076	0.076	0.229499
Sweden_LN.SG	RISE98.SG	0.117	0.314	0.569	0.022	0.069	0.071	0.0362479
Sweden_LN.SG	RISE179.SG	0.121	0.275	0.604	0.054	0.158	0.151	0.880792
Switzerland_EBA_1	MX193	0.239	0.784	-0.023	0.022	0.069	0.07	0.754189	infeasible
Switzerland_EBA_1	RA54	0.205	0.739	0.056	0.032	0.116	0.116	0.805346
Switzerland_EBA_1	TU876(SX10)	0.18	0.878	-0.058	0.023	0.076	0.077	0.428172	infeasible
Switzerland_EBA_1	TU904(SX17)	0.161	0.814	0.025	0.029	0.103	0.101	0.129912
Switzerland_EBA_1	TU908(SX21)	0.126	0.856	0.018	0.023	0.072	0.073	0.0264804
Switzerland_EBA_1	TU910(SX22)	0.157	0.904	-0.061	0.023	0.072	0.073	0.938376	infeasible
Switzerland_EBA_1	TU914(SX26)	0.182	0.843	-0.026	0.024	0.073	0.072	0.625149	infeasible

[truncated: 1 more sheets: Table K MLBA Steppe Pastoralist]
