# Supplementary figures and images for: The spatiotemporal patterns of major human admixture events during the European Holocene
Source: eLife journal article supplement (doi:10.7554/elife.77625), 2022-05-30

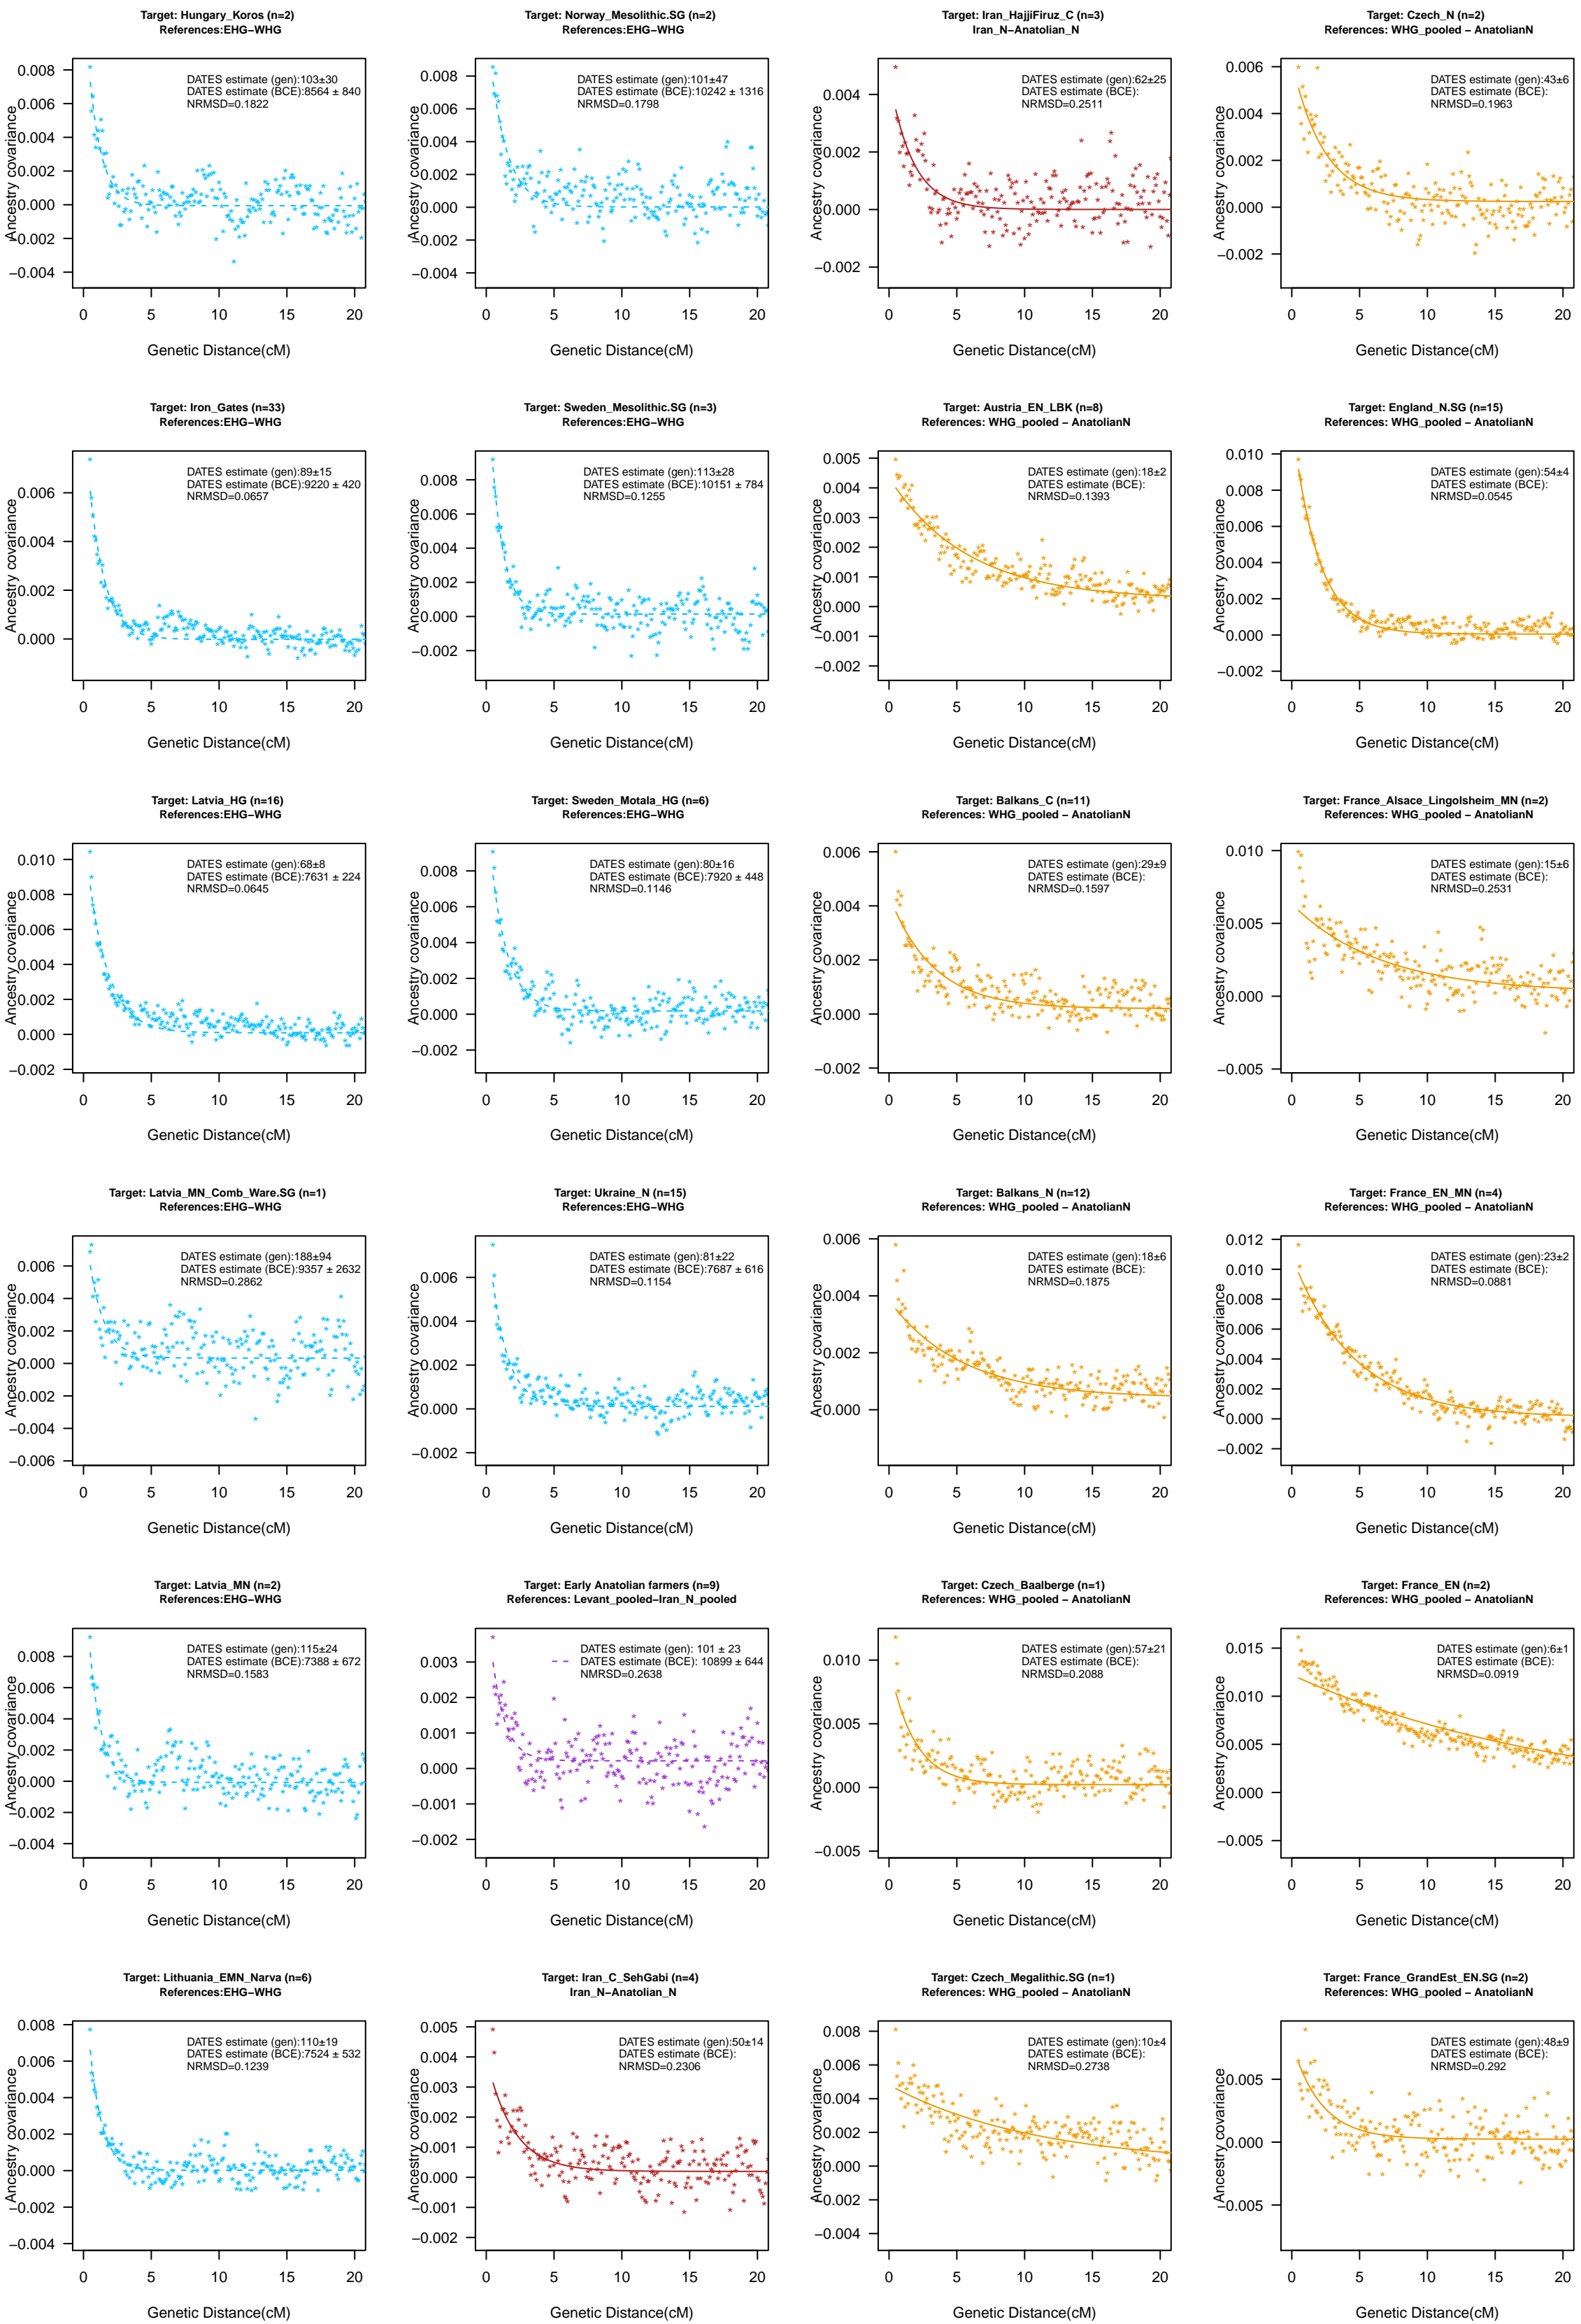

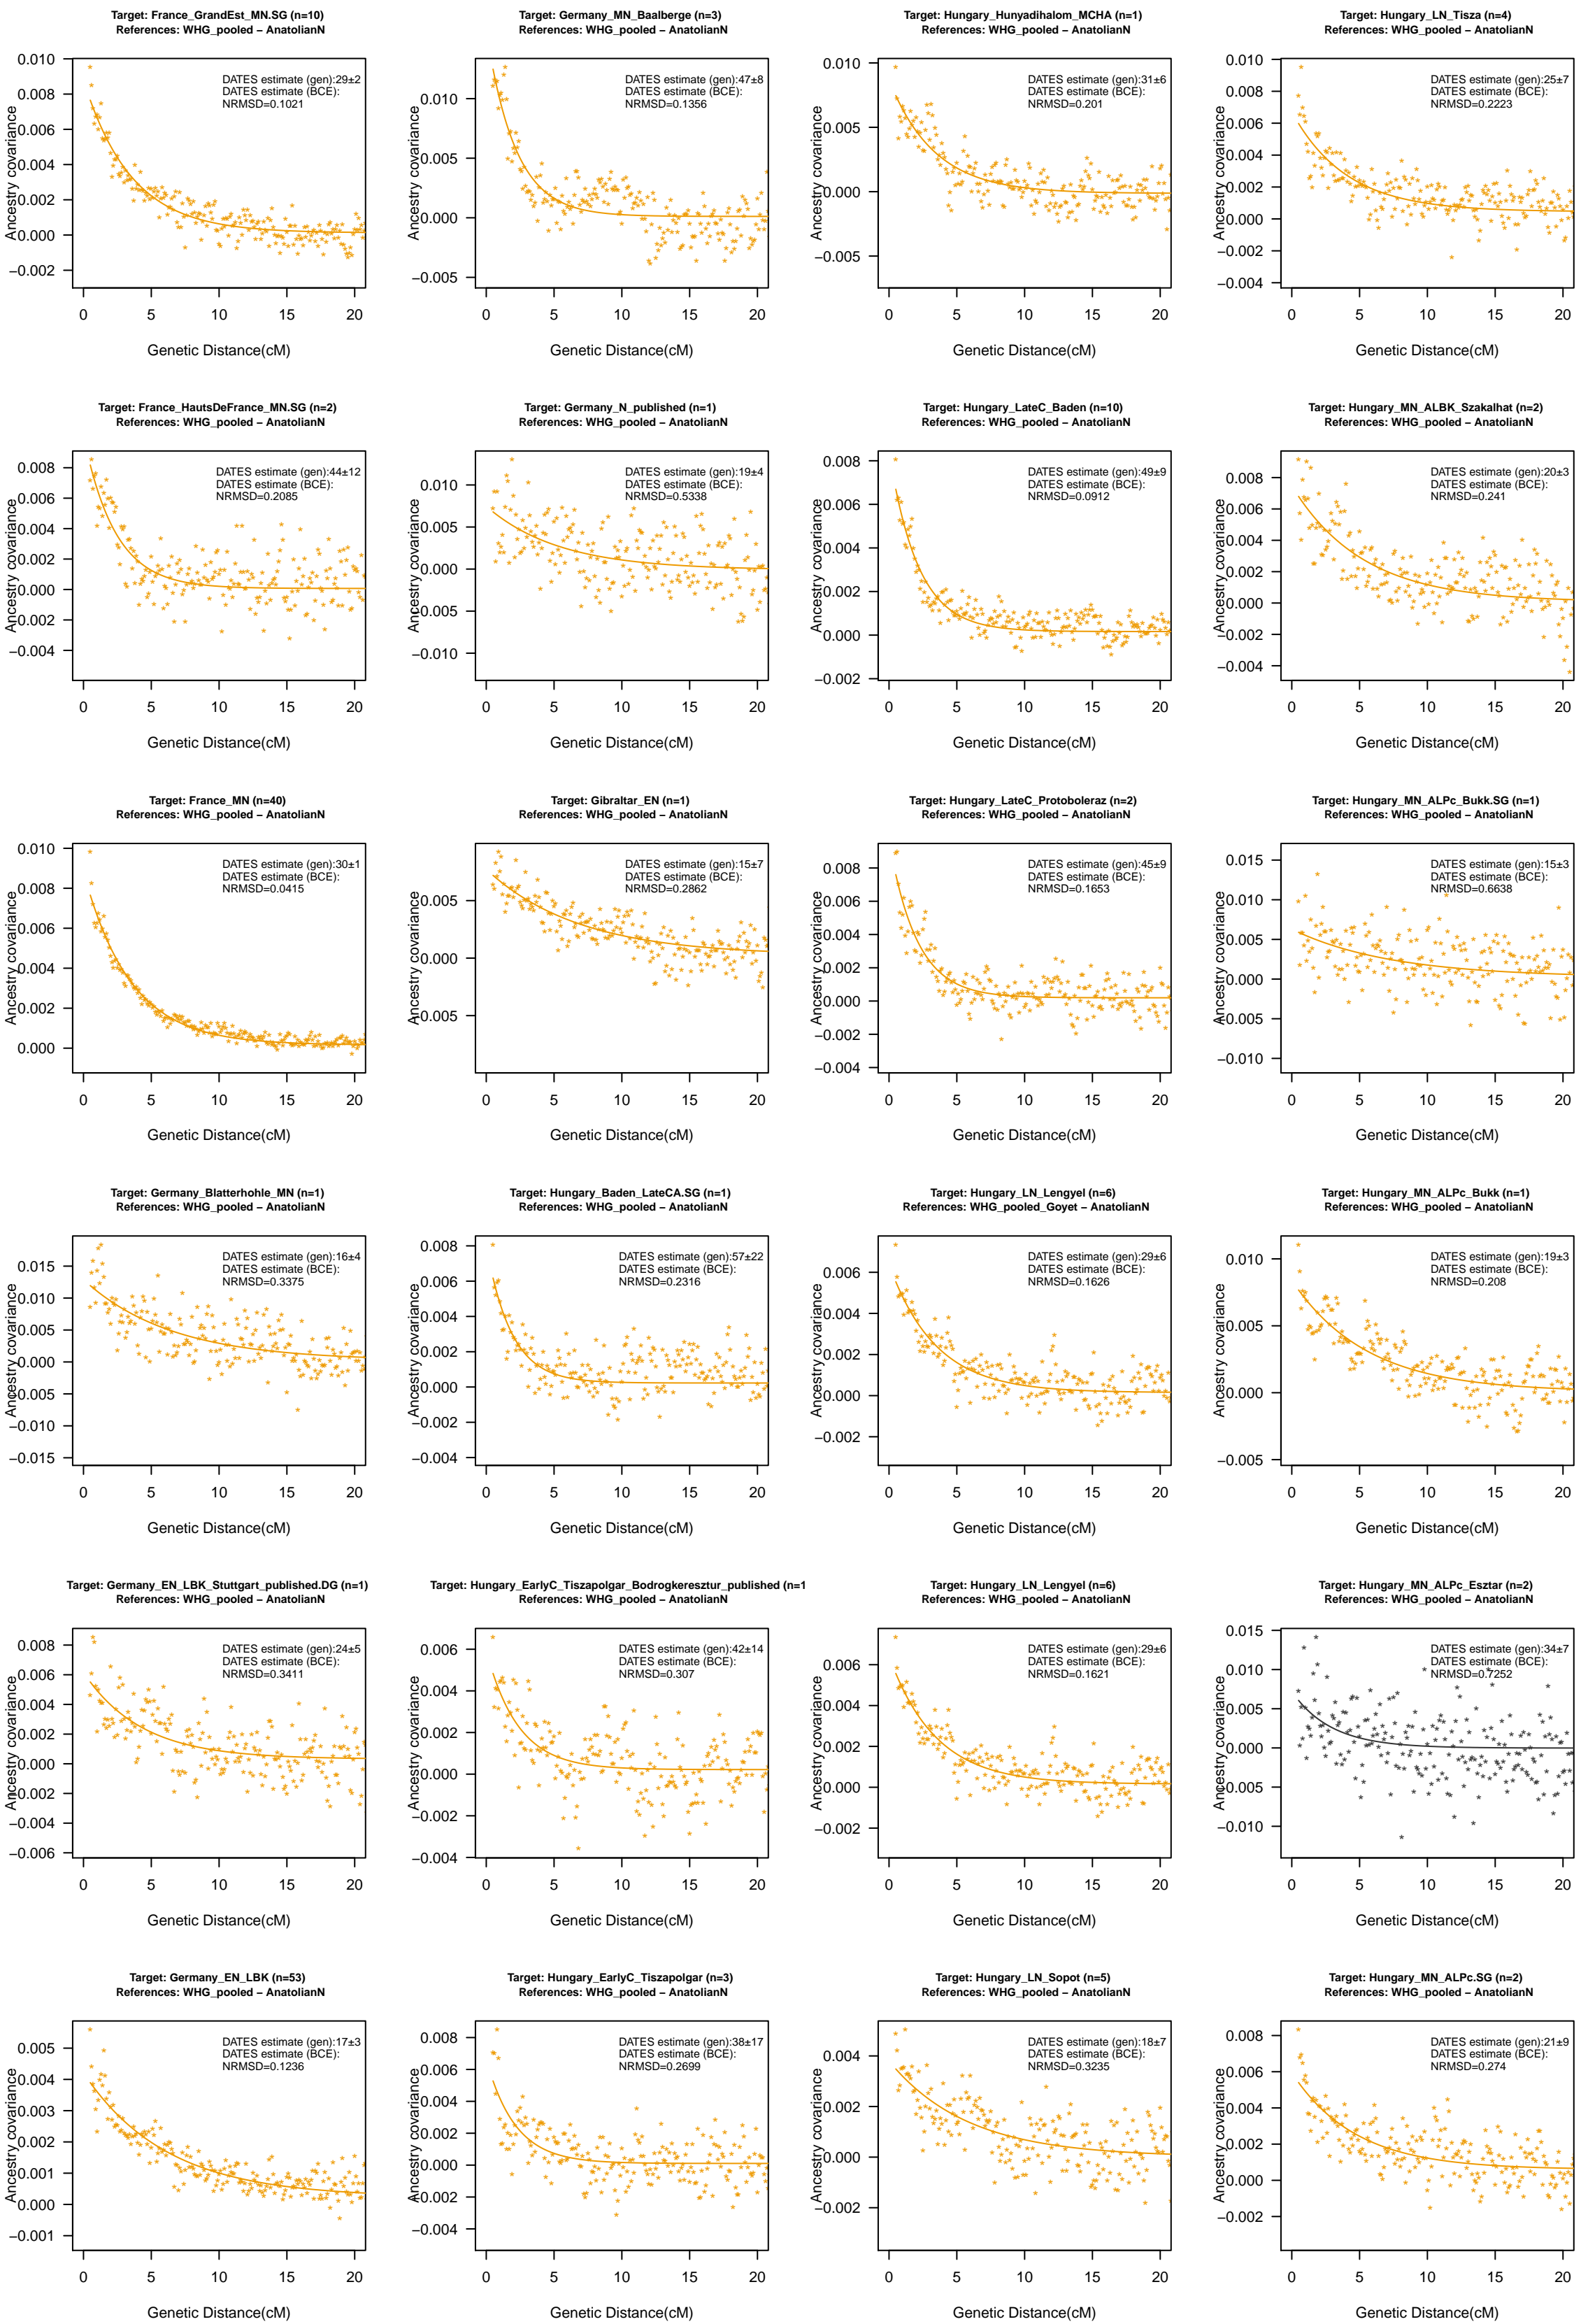

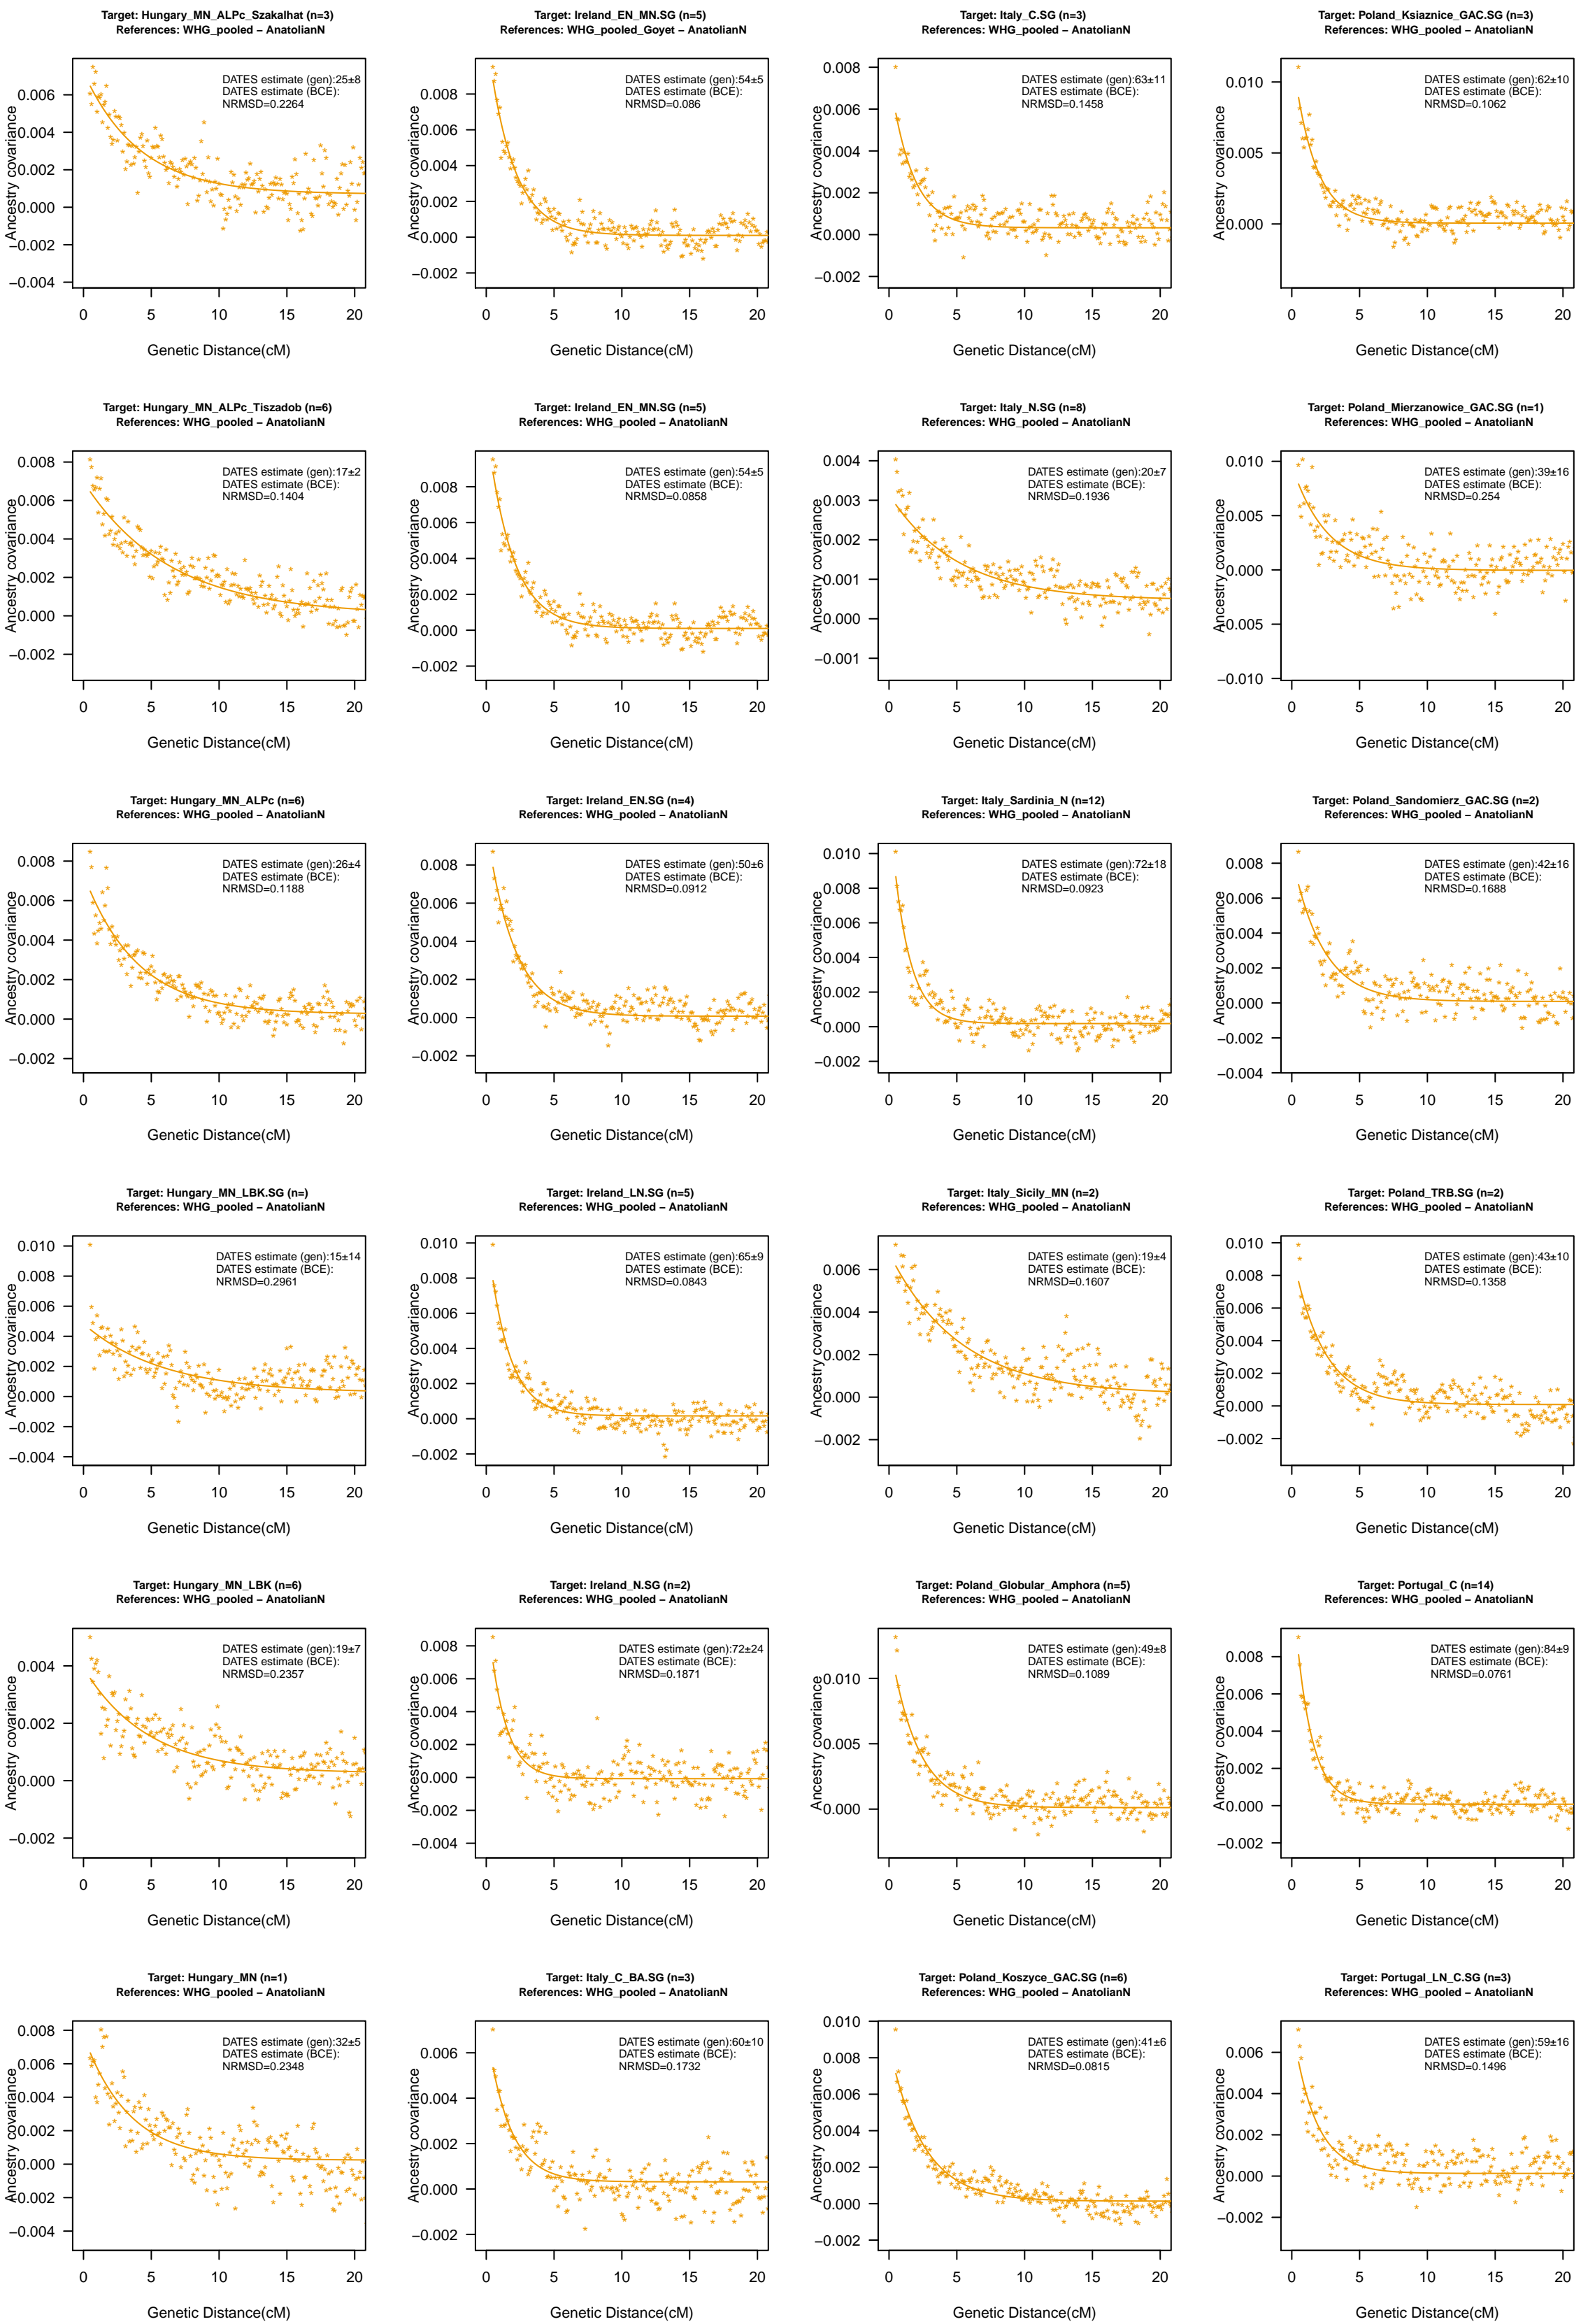

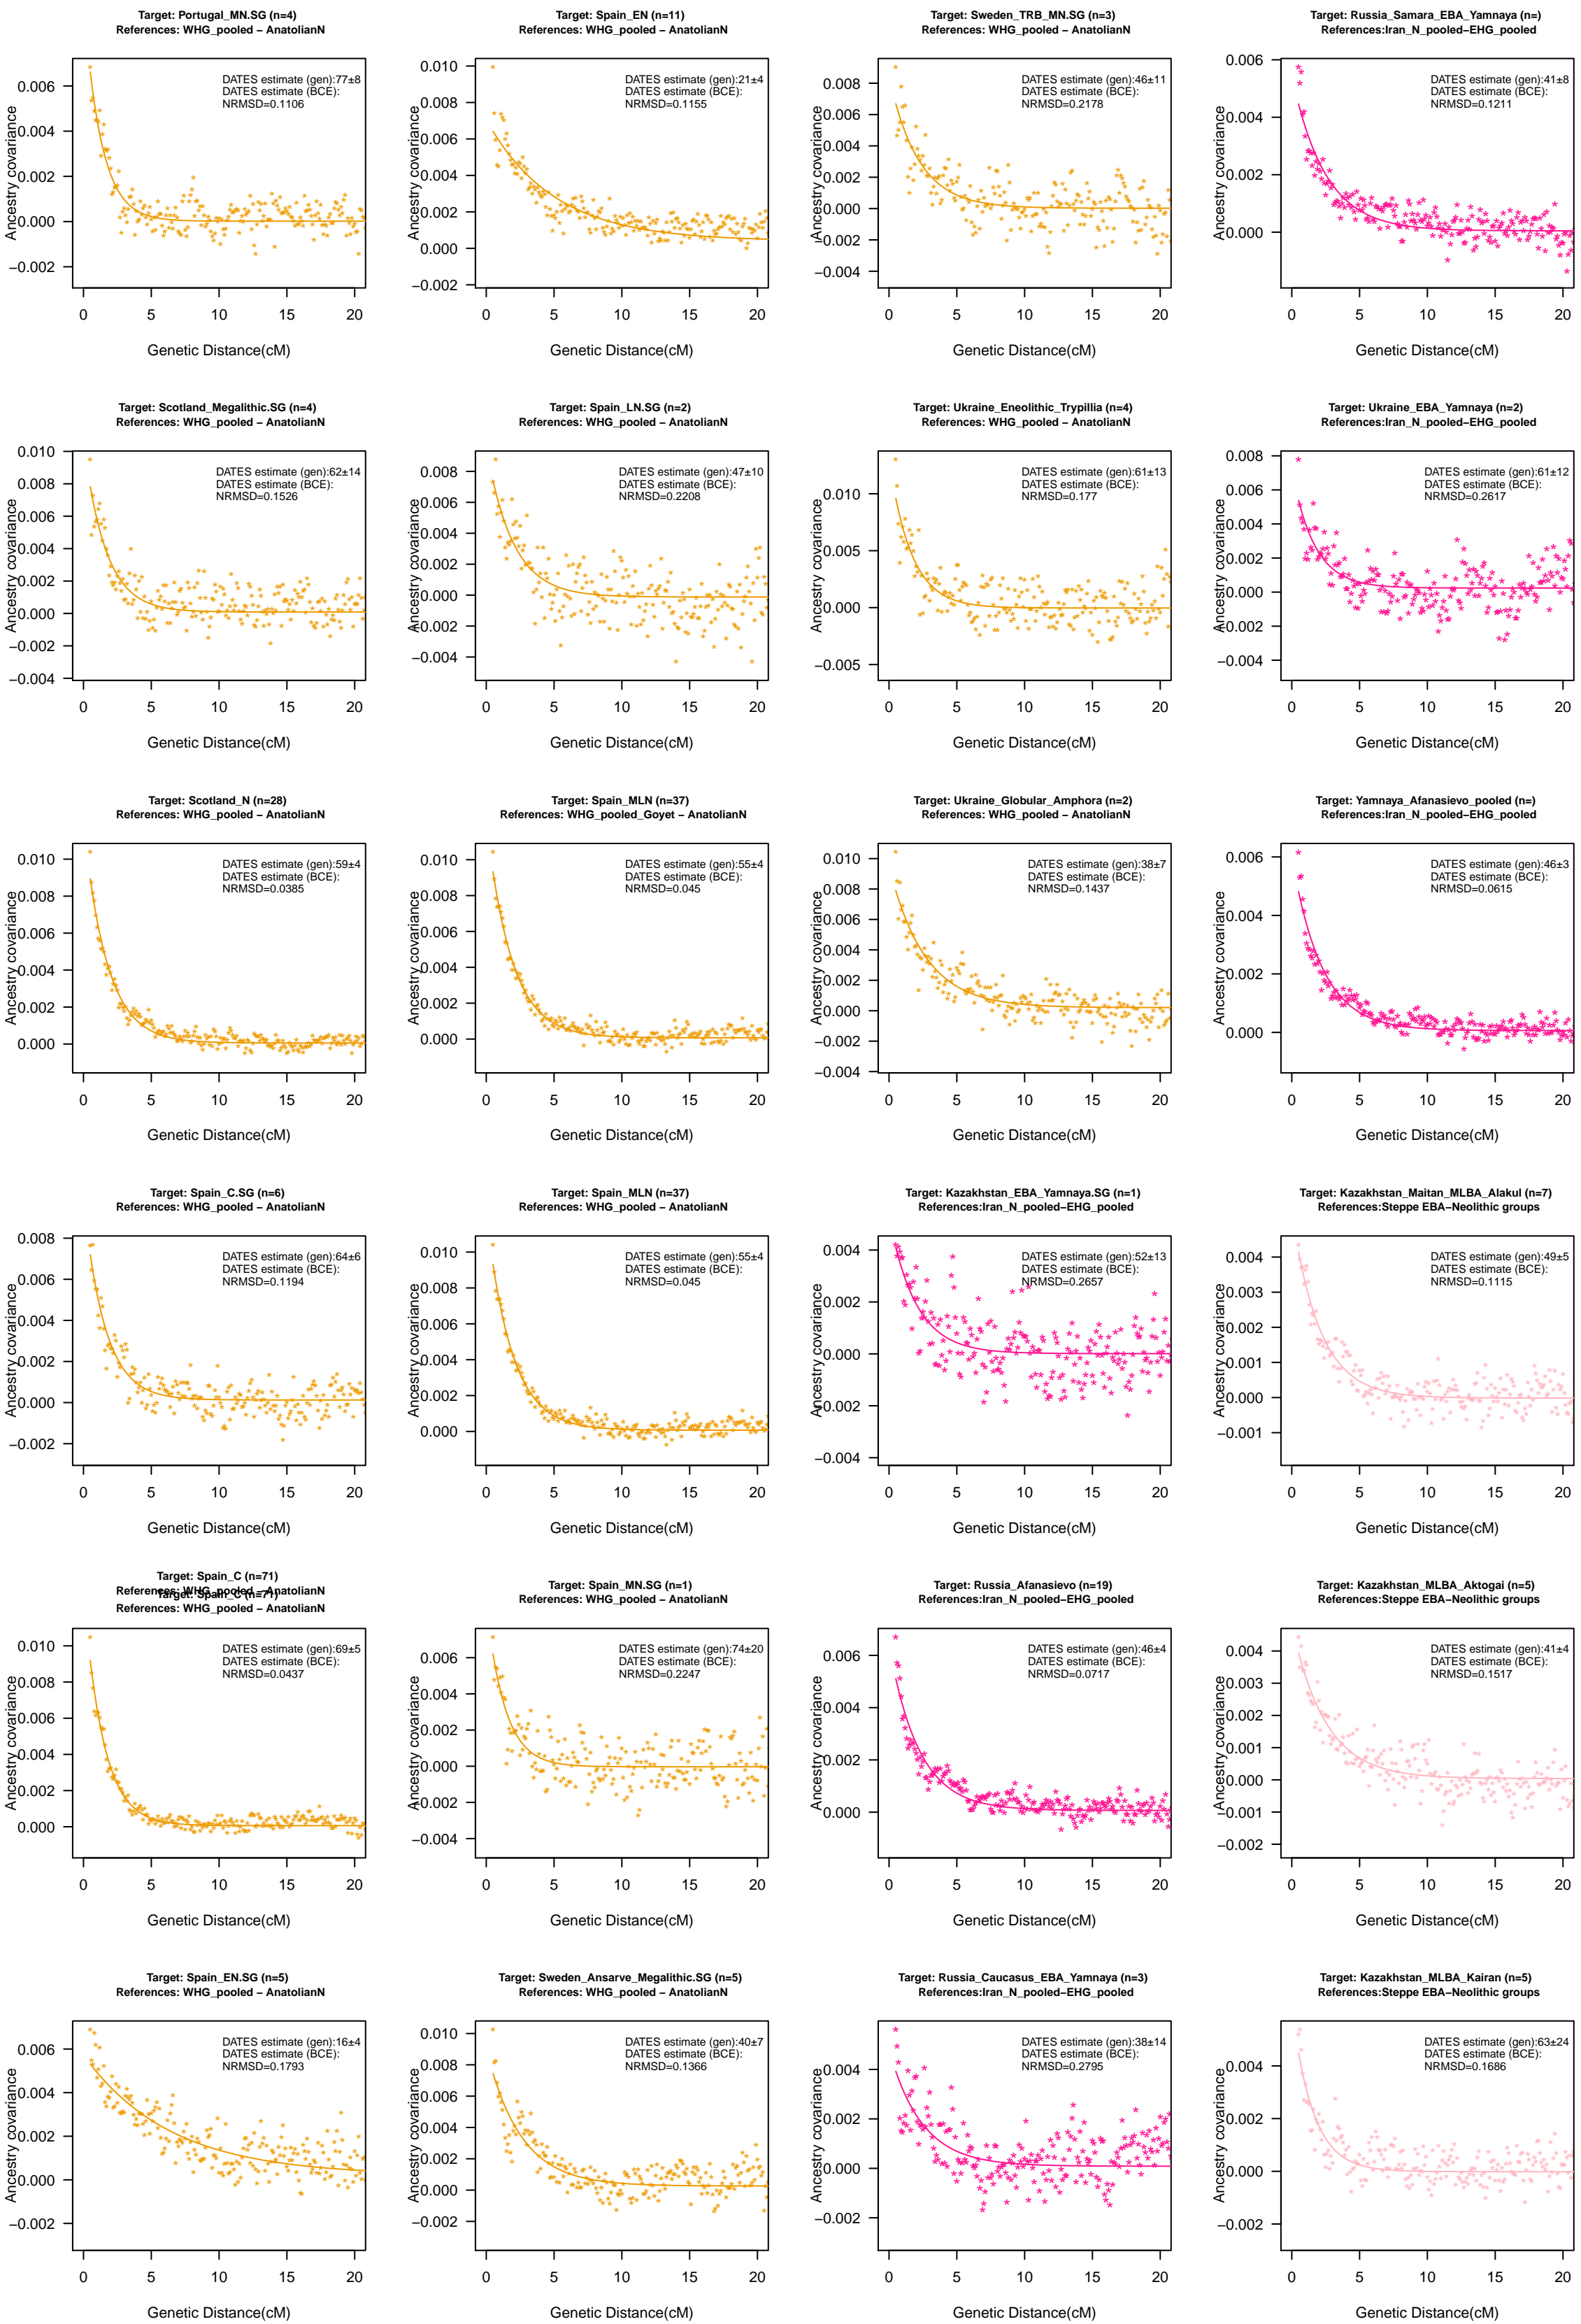



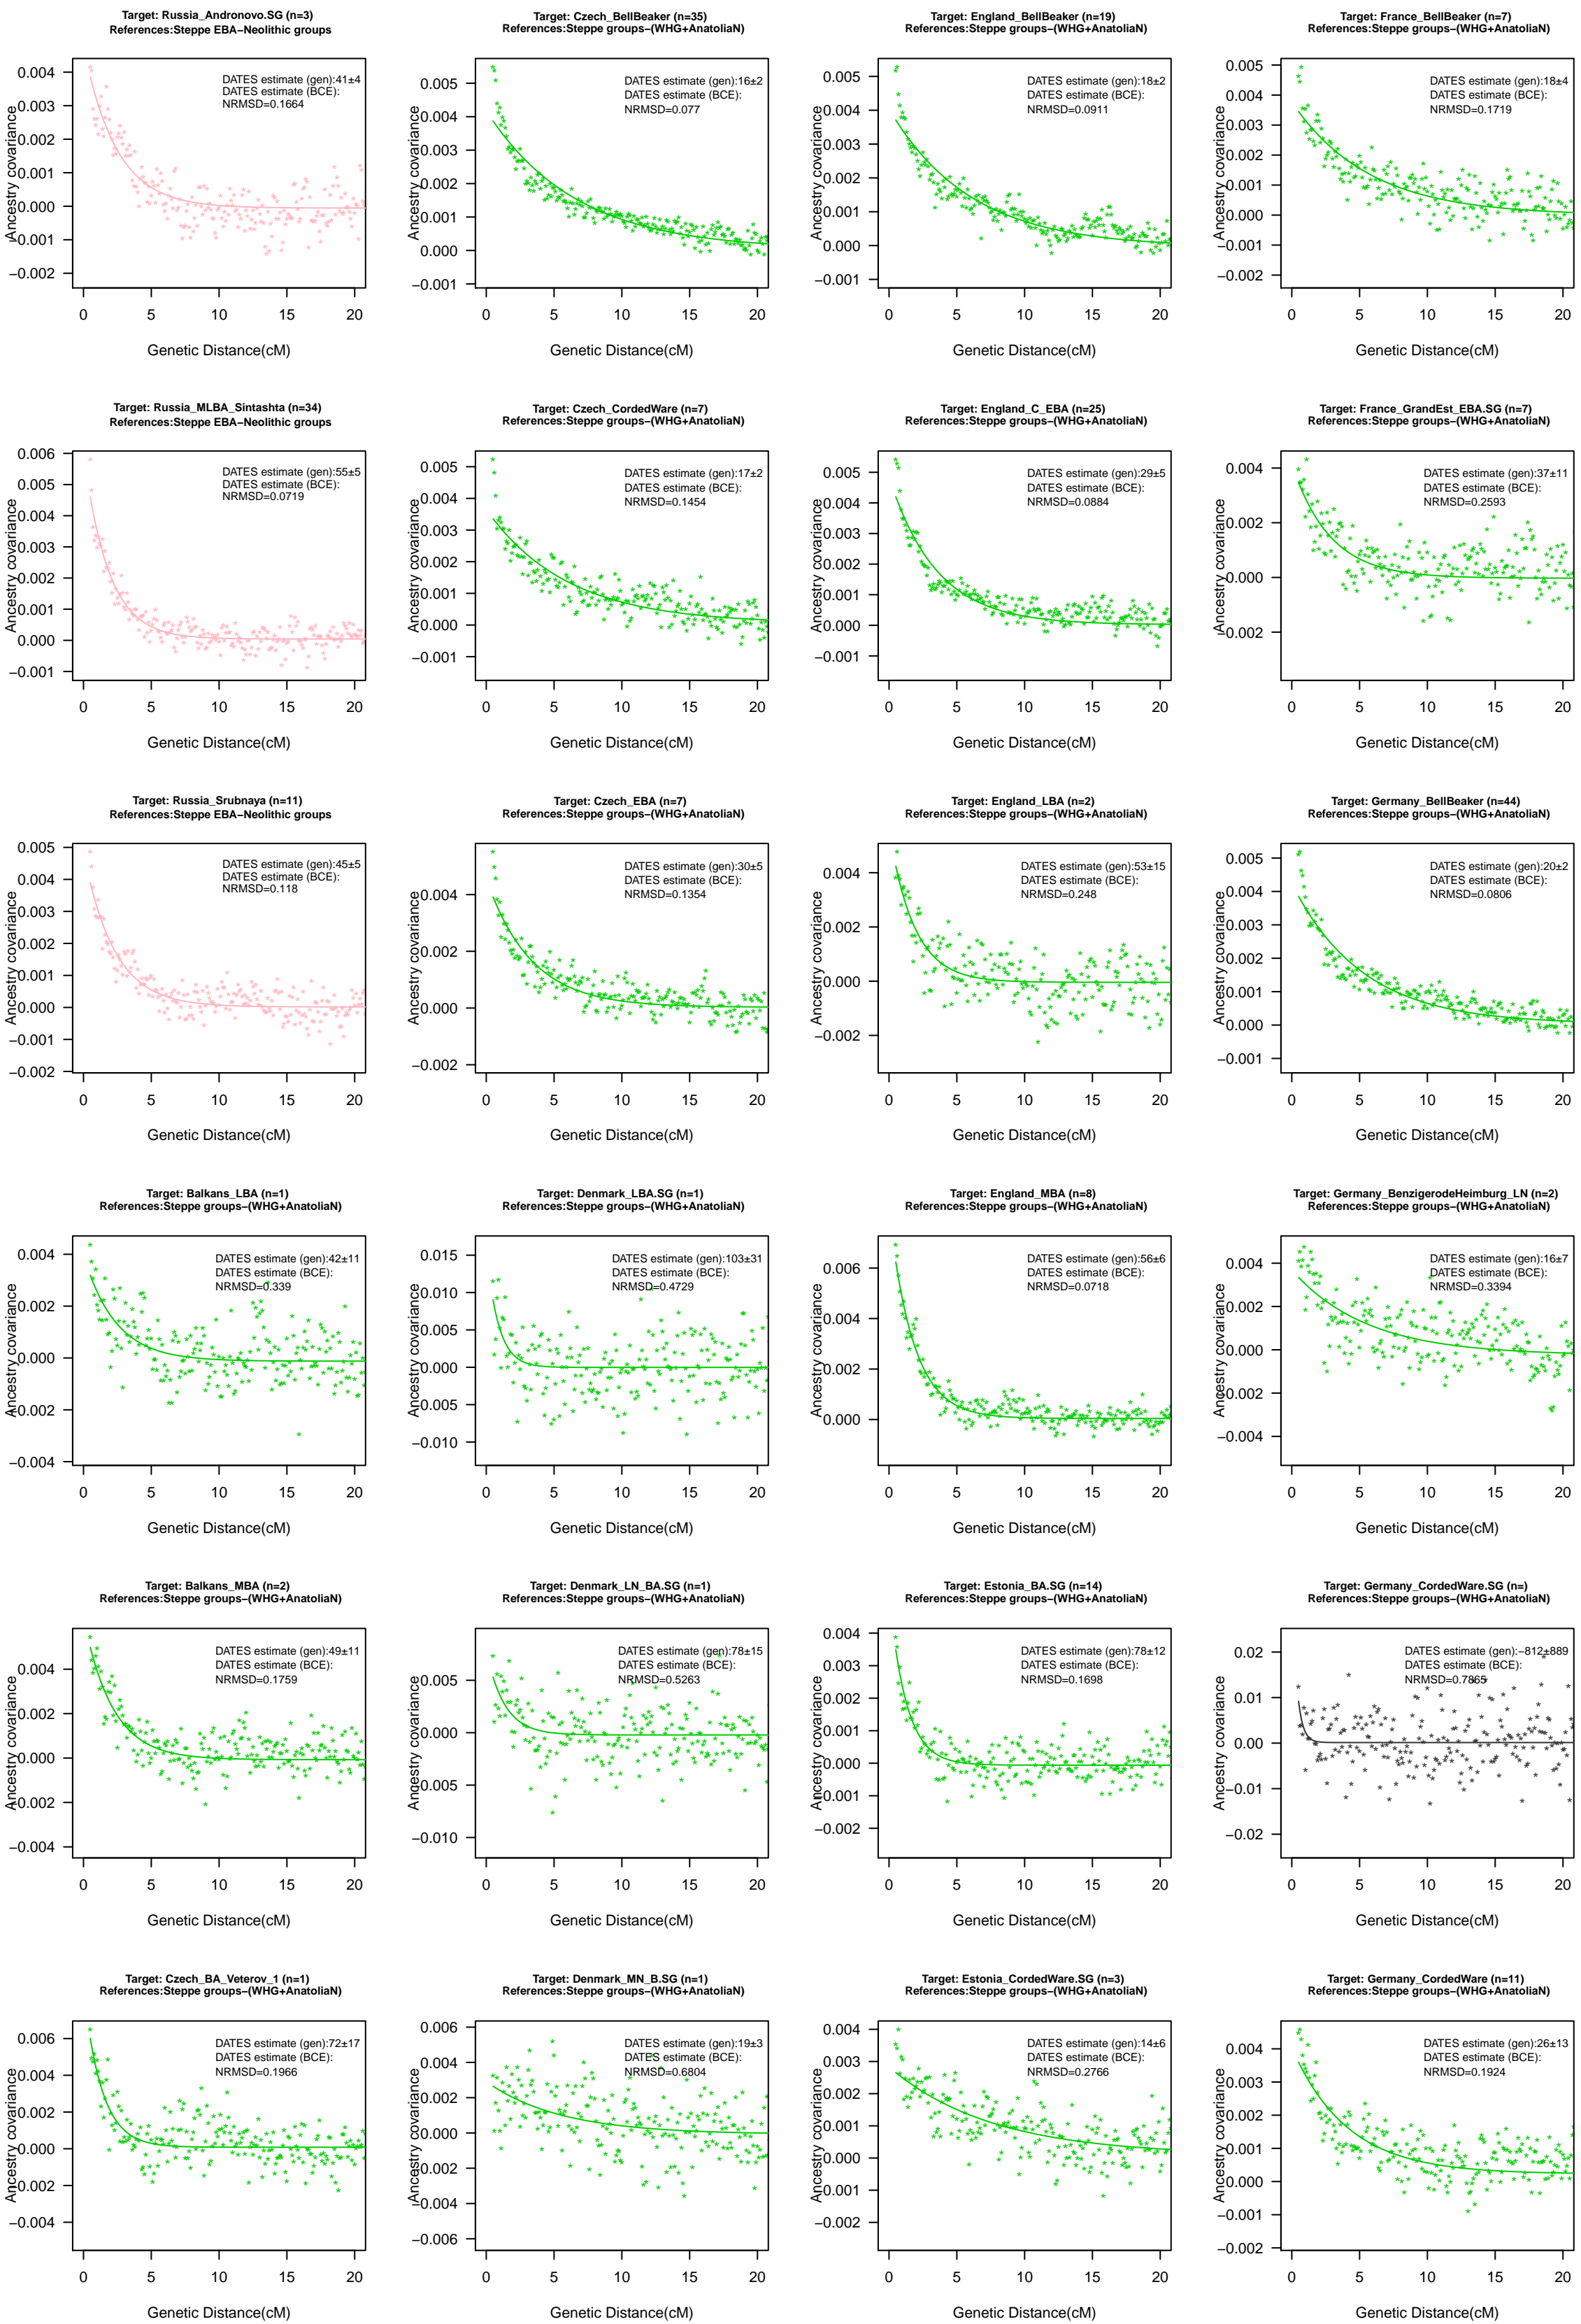

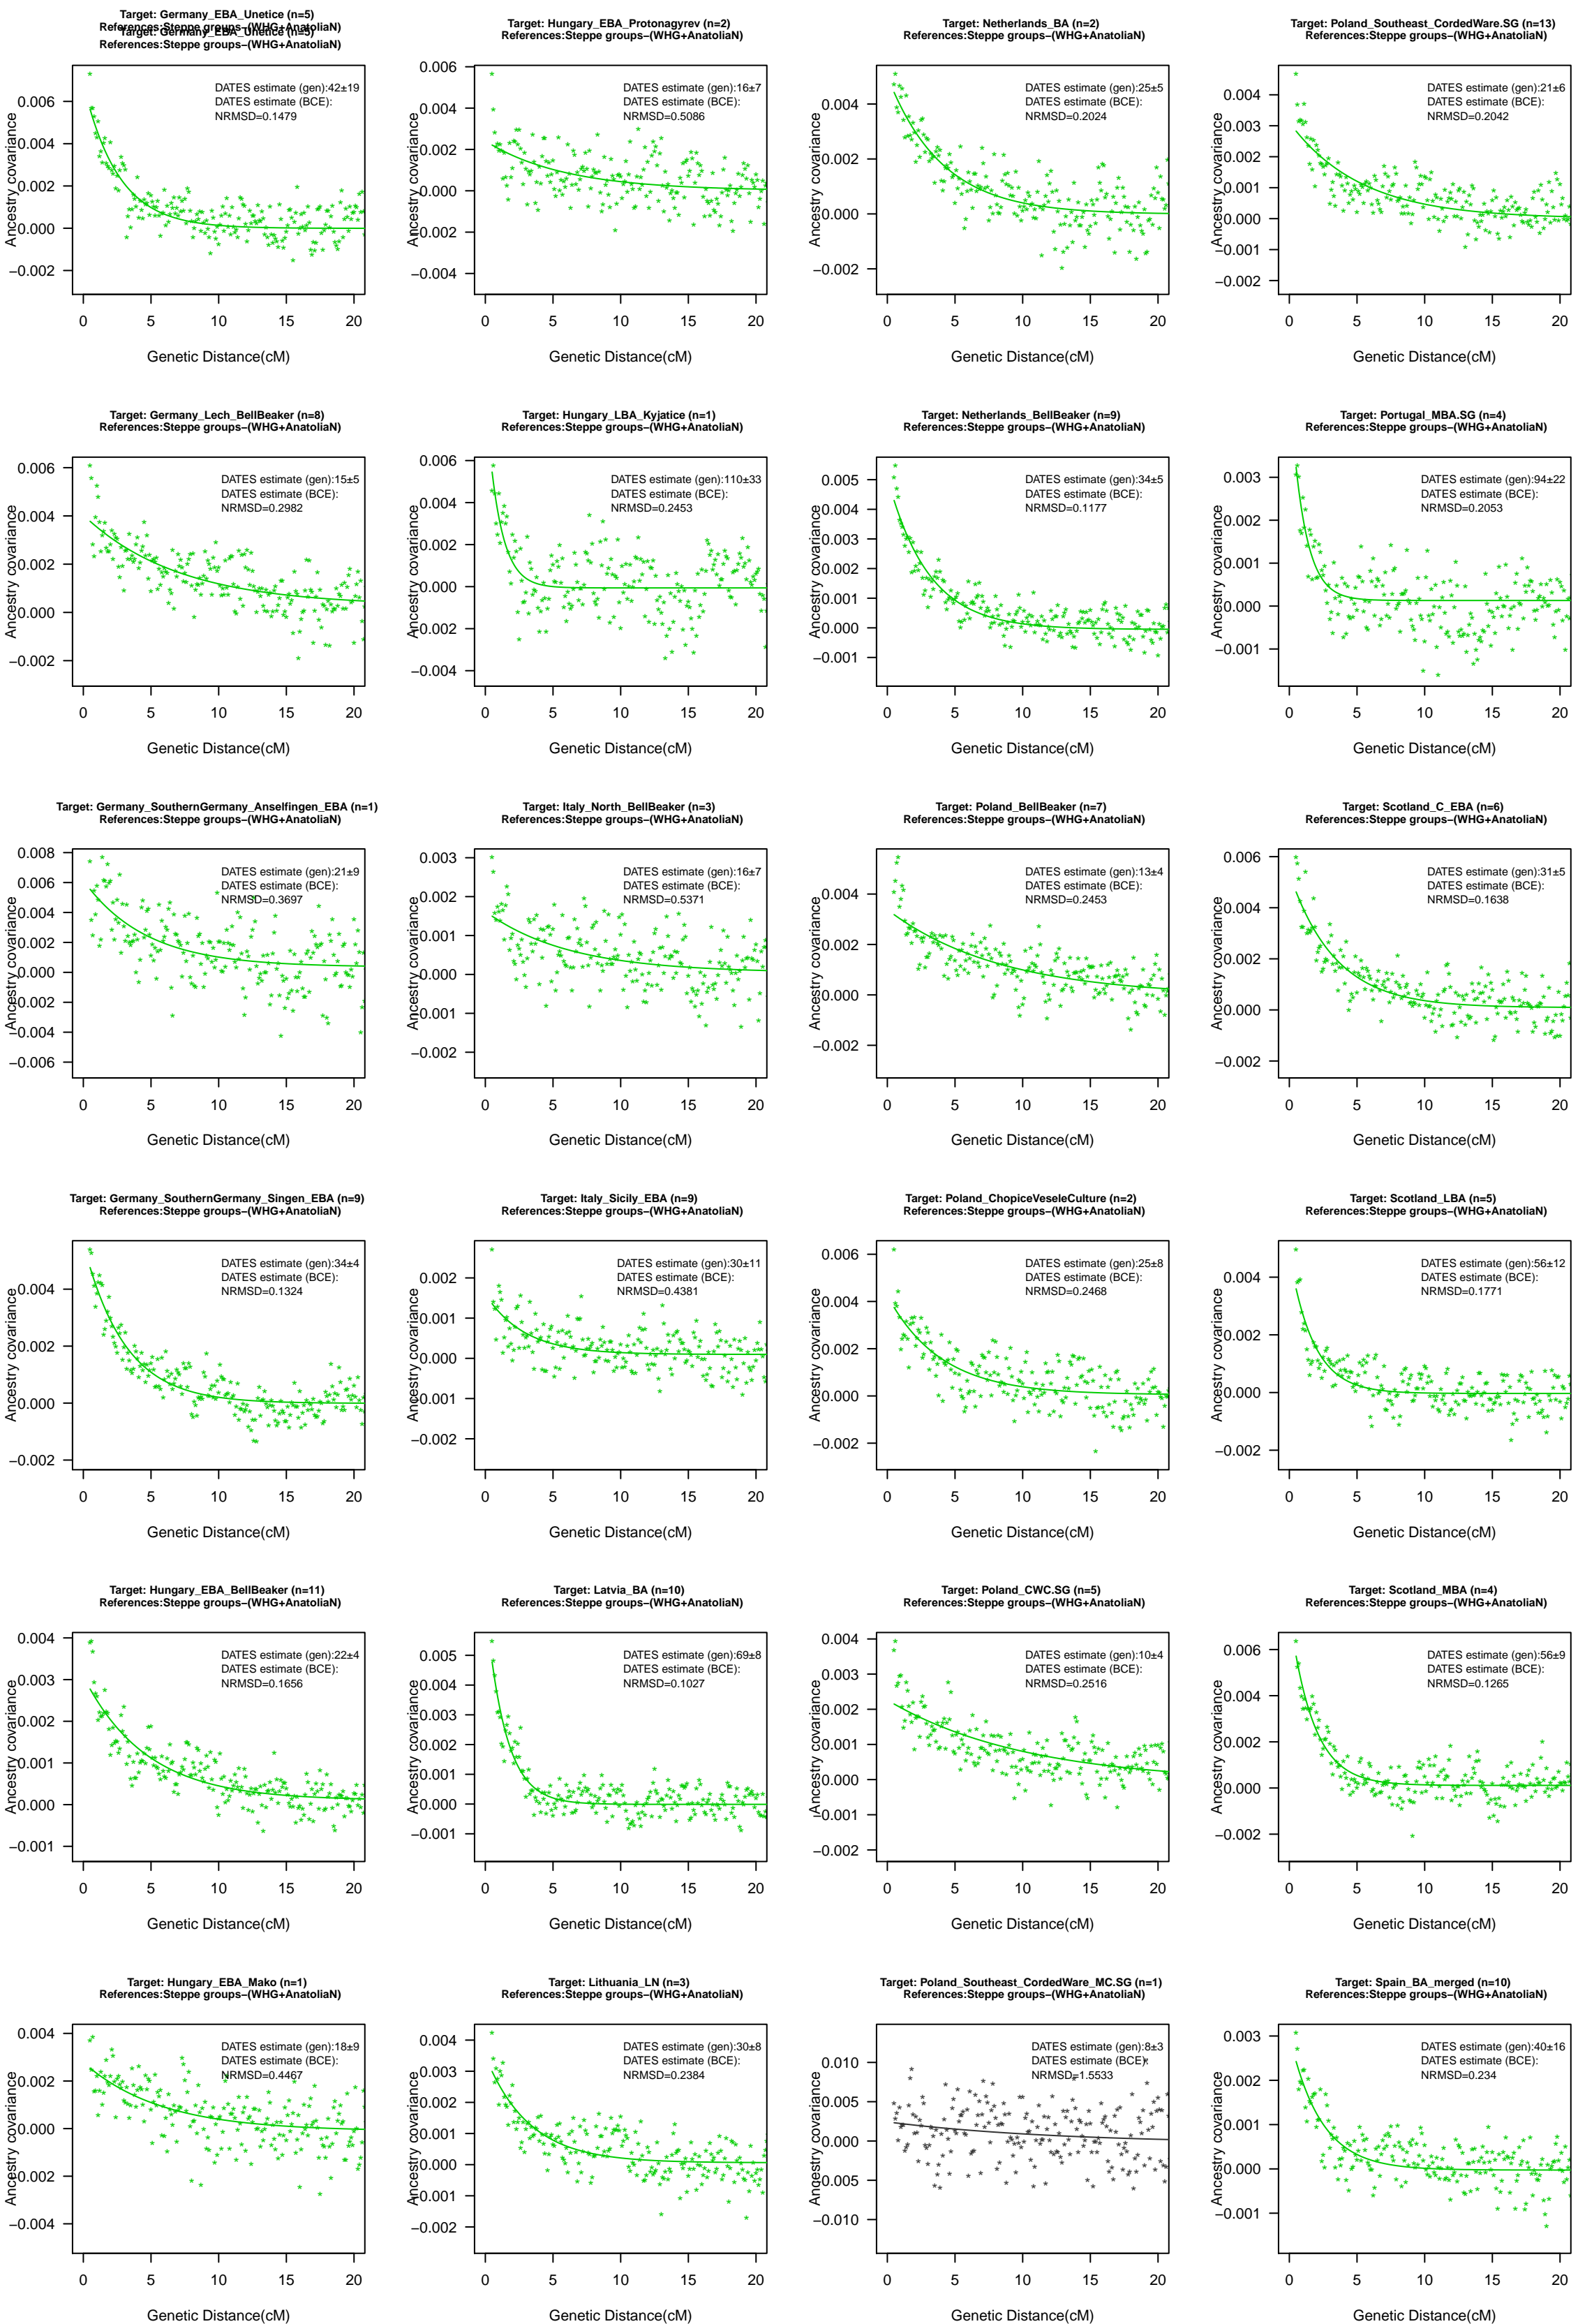

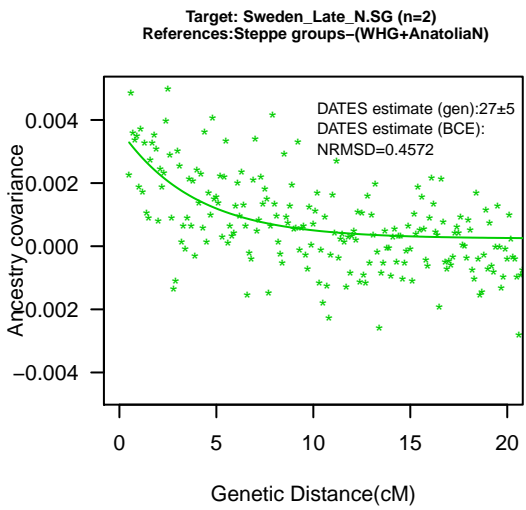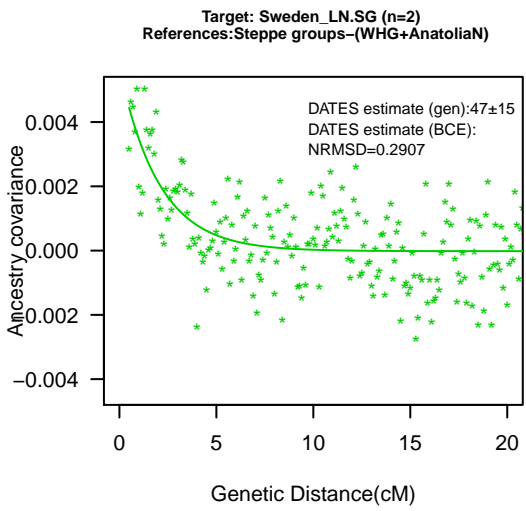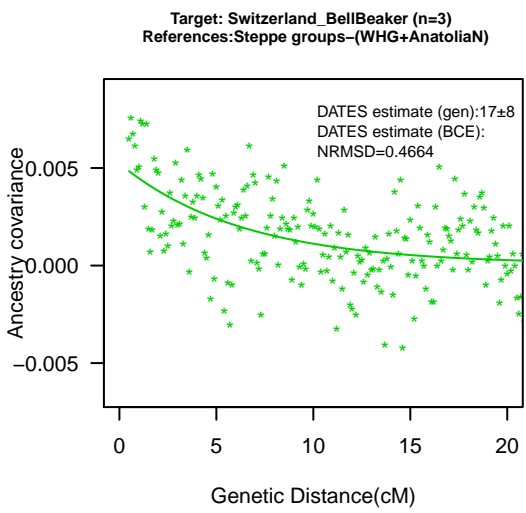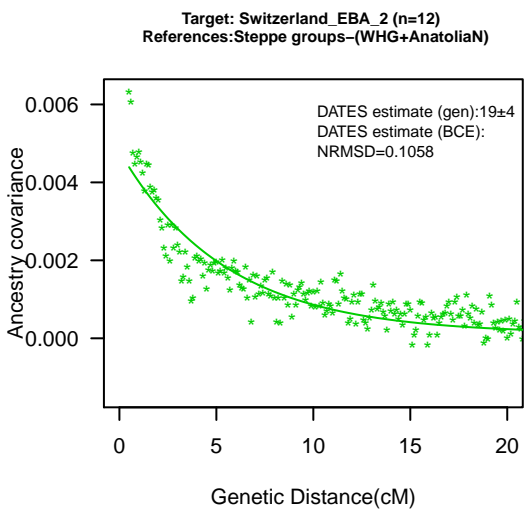

Supplement: supp [file elife_poa_e77625_Figure_3_figure_supplement_1.pdf › elife_poa_e77625_Figure_3_figure_supplement_1.pdf]
